# Supplementary material for: Genome-Wide Association Study Identifies New Risk Loci for Progression of Schistosomiasis Among the Chinese Population
Source: Front Cell Infect Microbiol. 2022 Apr 12;12:871545. doi: 10.3389/fcimb.2022.871545 (PMC9039613; doi:10.3389/fcimb.2022.871545)
Supplement: Supplementary file 2 [file Table_1.xlsx]

## Sheet: Table S1
Supplementary Table S1. Genomic loci associated with schistosomiasis serum levels of hyaluronic acid in 637 independent individuals.
Note: Summary statistics were generated using linear regression models of SNP associations with hyaluronic acid measures in individual cohorts. Independent lead SNPs are defined by r2 < .1; distinct genomic loci are >250kb apart. Bonferroni-corrected two-tailed P value threshold for significance = 5E-08, a suggested P value thredshold for significance = 1E-05. IndSigSNPs=independent (r2 < .6) SNP…
GenomicLocus	rsID	chr	pos	p	start	end	nSNPs	nGWASSNPs	nIndSigSNPs	IndSigSNPs	nLeadSNPs	LeadSNPs
1	rs106520	3	124376653	6.491e-06	124352070	124376653	2	2	1	rs106520	1	rs106520
2	rs11247975	4	1165130	9.013e-06	1075271	1179213	28	27	1	rs11247975	1	rs11247975
3	rs17020797	4	94497853	7.911e-06	94490109	94537120	45	45	1	rs17020797	1	rs17020797
4	rs60934439	5	131639843	2.876e-06	131631494	131742228	26	26	1	rs60934439	1	rs60934439
5	rs6902848	6	18144430	2.615e-06	18144430	18190957	29	29	1	rs6902848	1	rs6902848
6	rs5884297	7	53130770	8.646e-06	53130770	53167864	6	6	1	rs5884297	1	rs5884297
7	rs10809696	9	12104635	3.074e-06	12100971	12213613	16	15	1	rs10809696	1	rs10809696
8	10:1513971	10	1513971	6.098e-06	1513971	1513971	1	1	1	10:1513971	1	10:1513971
9	rs983360	11	38648413	1.815e-06	38616629	38714926	105	24	3	rs983360	1	rs983360
10	12:5750791	12	5750791	2.877e-06	5750791	5804167	10	10	1	12:5750791	1	12:5750791
11	rs77694734	12	114607545	2.74e-06	114471920	114607545	64	64	2	rs77694734	1	rs77694734
12	rs61536991	12	117791580	6.79e-06	117781391	117791580	8	8	1	rs61536991	1	rs61536991
13	rs1072605	13	40165059	3.264e-06	40093984	40183893	48	40	3	rs1072605	1	rs1072605
14	rs17091769	14	57066908	7.436e-06	57029172	57114986	109	109	1	rs17091769	1	rs17091769
15	rs34486793	14	98645310	1.415e-08	98644581	98655131	9	9	2	rs34486793	1	rs34486793
16	rs9949754	18	21800298	8.313e-07	21800298	21800299	2	2	1	rs9949754	1	rs9949754
17	rs6111234	20	16646941	4.489e-06	16645332	16660162	14	13	1	rs6111234	1	rs6111234
18	rs62205791	20	56325452	6.52e-07	56324085	56325452	3	2	1	rs62205791	1	rs62205791
19	rs112307230	21	41983168	3.967e-06	41935135	41987879	66	66	1	rs112307230	1	rs112307230

## Sheet: Table S2
Supplementary Table S2. SNPs in the genomic loci associated with schistosomiasis serum levels of hyaluronic acid in GWAS analysis of 637 independent individuals.
Note: Associated genomic loci were defined by all SNPs in LD (r2>0.6) with an independent significant (P < 1e-5) SNP. CADD: Combined Annotation Dependent Depletion score; RDB: Regulome DB score; MAF: effect allele frequency; MAF: Regression coefficient.
GenomicLocus	rsID	chr	pos	non_effect_allele	effect_allele	MAF	gwasP	beta	se	r2	IndSigSNP	nearestGene	dist	func	CADD	RDB	minChrState	commonChrState	posMapFilt	eqtlMapFilt	ciMapFilt
1	rs621260	3	124352070	T	C	0.2113	2.358e-05	0.161	0.03778	0.912937	rs106520	KALRN	0	intronic	2.775	NA	4	15	1	1	1
1	rs106520	3	124376653	A	G	0.2133	6.491e-06	0.1743	0.03831	1	rs106520	KALRN	0	intronic	15.69	5	4	15	1	1	1
2	rs2290407	4	1075271	C	T	0.3284	0.0002127	0.1392	0.03737	0.841265	rs11247975	RNF212	0	intronic	0.144	NA	5	14	1	1	1
2	GSA-rs28717061	4	1078172	G	A	0.3294	0.0002127	0.1392	0.03737	0.837877	rs11247975	RNF212	0	intronic	0.042	5	5	14	1	1	1
2	rs17164229	4	1078596	C	T	0.3294	0.0001976	0.1402	0.03743	0.837877	rs11247975	RNF212	0	intronic	1.21	5	5	14	1	1	1
2	rs79053889	4	1083307	G	A	0.3294	4.986e-05	0.1531	0.03749	0.837877	rs11247975	RNF212	0	intronic	1.2	6	5	15	1	1	1
2	rs17164235	4	1084061	C	T	0.3294	5.627e-05	0.1521	0.03751	0.837877	rs11247975	RNF212	0	intronic	0.554	7	5	15	1	1	1
2	rs62296477	4	1107478	C	T	0.3264	6.013e-05	0.1534	0.03796	0.932132	rs11247975	RP11-20I20.2	0	ncRNA_exonic	7.446	4	1	10	1	1	1
2	rs11510471	4	1107776	G	C	0.3313	9.852e-05	0.1495	0.03813	0.920112	rs11247975	RP11-20I20.2	0	ncRNA_intronic	3.567	2b	1	14	1	1	1
2	rs4974591	4	1113161	G	A	0.3294	1.84e-05	0.1612	0.03735	0.953173	rs11247975	RP11-20I20.2:TMED11P	0:0	ncRNA_intronic	14.49	7	5	14	1	1	1
2	rs6826705	4	1122634	G	A	0.3264	1.217e-05	0.1644	0.03727	0.965789	rs11247975	RP11-20I20.2:TMED11P	0:0	ncRNA_intronic	6.664	6	5	14	1	1	1
2	rs4368552	4	1128054	T	C	0.3304	1.84e-05	0.1612	0.03735	0.957667	rs11247975	TMED11P	0	ncRNA_intronic	2.369	7	1	14	1	1	1
2	rs2127908	4	1128925	T	C	0.3304	1.84e-05	0.1612	0.03735	0.957667	rs11247975	TMED11P	0	ncRNA_intronic	0.187	1f	1	14	1	1	1
2	rs4974627	4	1129975	G	C	0.3304	1.319e-05	0.1644	0.03743	0.957667	rs11247975	TMED11P	0	ncRNA_intronic	1.16	1f	1	14	1	1	1
2	rs13132174	4	1133382	C	G	0.3254	1.217e-05	0.1644	0.03727	0.978557	rs11247975	TMED11P	0	ncRNA_intronic	2.563	6	5	14	1	1	1
2	exm2265814	4	1135350	G	A	0.3254	1.361e-05	0.1632	0.03723	0.978557	rs11247975	TMED11P	0	ncRNA_intronic	14.07	6	5	14	1	1	1
2	rs4974562	4	1138137	T	C	0.3452	7.84e-05	0.1522	0.03826	0.905871	rs11247975	TMED11P	0	ncRNA_intronic	3.268	7	5	14	1	1	1
2	rs4974563	4	1138153	T	C	0.3423	6.526e-05	0.1538	0.03824	0.91757	rs11247975	TMED11P	0	ncRNA_intronic	6.658	7	5	14	1	1	1
2	rs4974564	4	1138334	A	G	0.3264	1.217e-05	0.1644	0.03727	0.982842	rs11247975	TMED11P	0	ncRNA_intronic	1.742	7	5	14	1	1	1
2	rs4974630	4	1138518	C	T	0.3631	NA	NA	NA	0.840788	rs11247975	TMED11P	0	ncRNA_intronic	3.315	7	5	14	1	0	1
2	rs35637542	4	1140414	A	G	0.3284	6.506e-05	0.1515	0.03768	0.965839	rs11247975	TMED11P	0	ncRNA_intronic	3.557	7	5	14	1	1	1
2	rs28569895	4	1142318	A	T	0.3403	0.0001953	0.1435	0.03829	0.911551	rs11247975	TMED11P	0	ncRNA_intronic	1.208	5	5	15	1	1	1
2	rs750305	4	1143908	A	G	0.3413	0.0001758	0.1446	0.03831	0.915769	rs11247975	TMED11P	0	ncRNA_intronic	0.3	NA	5	14	1	1	1
2	rs34839222	4	1144123	A	ACT	0.3403	0.0001555	0.1454	0.03821	0.919655	rs11247975	TMED11P	0	ncRNA_intronic	1.532	NA	5	15	1	1	1
2	rs963598	4	1147333	A	C	0.3254	5.722e-05	0.1515	0.03738	0.978557	rs11247975	TMED11P:AC092535.3	0:0	ncRNA_exonic	4.244	5	1	14	1	1	1
2	rs2279279	4	1164277	G	C	0.3234	9.111e-06	0.1669	0.0373	0.995684	rs11247975	SPON2	0	exonic	18.65	5	2	13	1	1	1
2	rs11247975	4	1165130	T	G	0.3244	9.013e-06	0.1669	0.03728	1	rs11247975	SPON2	0	exonic	7.876	NA	1	13	1	1	1
2	rs878323	4	1169813	T	G	0.3234	3.381e-05	0.1576	0.03773	0.995684	rs11247975	SPON2	0	intronic	1.436	5	5	14	1	1	1
2	rs12505896	4	1171863	T	C	0.3244	2.01e-05	0.1662	0.03866	0.95735	rs11247975	SPON2	0	intronic	0.501	5	1	14	1	1	1
2	rs7659624	4	1179213	T	C	0.3194	0.0001757	0.1456	0.03856	0.978745	rs11247975	SPON2	0	intronic	0.972	6	5	15	1	1	1
3	rs35170469	4	94490109	A	G	0.1161	2.941e-05	0.1569	0.03729	0.815903	rs17020797	GRID2	0	intronic	2.676	5	9	15	1	0	1
3	rs34393004	4	94491226	T	C	0.1171	2.135e-05	0.16	0.03736	0.808163	rs17020797	GRID2	0	intronic	2.682	7	14	15	1	0	1
3	rs78034928	4	94491539	T	C	0.09821	1.119e-05	0.1655	0.03737	0.978259	rs17020797	GRID2	0	intronic	1.336	7	14	15	1	0	1
3	rs72670645	4	94494796	A	G	0.09623	9.113e-06	0.1676	0.03745	1	rs17020797	GRID2	0	intronic	5.285	6	14	15	1	0	1
3	rs995908	4	94495759	T	C	0.1171	2.489e-05	0.1591	0.03746	0.808163	rs17020797	GRID2	0	intronic	0.517	7	9	15	1	0	1
3	rs13148050	4	94496809	A	T	0.1151	2.338e-05	0.1599	0.03751	0.823763	rs17020797	GRID2	0	intronic	2.991	7	14	15	1	0	1
3	rs17020797	4	94497853	T	G	0.09623	7.911e-06	0.1688	0.03748	1	rs17020797	GRID2	0	intronic	7.743	7	14	15	1	0	1
3	rs17355116	4	94497926	A	G	0.1151	1.554e-05	0.1639	0.03763	0.823763	rs17020797	GRID2	0	intronic	3.288	6	14	15	1	0	1
3	rs72670648	4	94499628	A	G	0.08036	6.249e-05	0.1515	0.03759	0.763065	rs17020797	GRID2	0	intronic	7.745	6	14	15	1	0	1
3	rs72670651	4	94500857	G	C	0.08036	6.249e-05	0.1515	0.03759	0.763065	rs17020797	GRID2	0	intronic	0.794	6	9	15	1	0	1
3	rs17020800	4	94501093	C	G	0.07937	6.249e-05	0.1515	0.03759	0.774306	rs17020797	GRID2	0	intronic	0.163	7	9	15	1	0	1
3	rs72670655	4	94508501	A	G	0.07937	6.087e-05	0.1515	0.03752	0.752829	rs17020797	GRID2	0	intronic	2.039	6	14	15	1	0	1
3	rs35269749	4	94510275	G	A	0.09722	0.0001741	0.1421	0.03762	0.608646	rs17020797	GRID2	0	intronic	0.61	7	14	15	1	0	1
3	rs368593460	4	94510904	T	C	0.07837	6.087e-05	0.1515	0.03752	0.764075	rs17020797	GRID2	0	intronic	1.932	7	14	15	1	0	1
3	rs62320412	4	94511018	G	C	0.09722	4.497e-05	0.1557	0.03788	0.608646	rs17020797	GRID2	0	intronic	1.321	7	14	15	1	0	1
3	rs367665506	4	94511060	G	T	0.09722	3.687e-05	0.1569	0.03775	0.608646	rs17020797	GRID2	0	intronic	1.275	6	14	15	1	0	1
3	rs371840871	4	94511147	T	C	0.07837	6.533e-05	0.1511	0.03758	0.764075	rs17020797	GRID2	0	intronic	1.698	6	14	15	1	0	1
3	rs373592883	4	94512255	T	C	0.07837	6.533e-05	0.1511	0.03758	0.764075	rs17020797	GRID2	0	intronic	2.535	7	14	15	1	0	1
3	4:94512297	4	94512297	G	A	0.09821	0.0001249	0.1453	0.03763	0.601051	rs17020797	GRID2	0	intronic	1.372	NA	14	15	1	0	1
3	rs77311391	4	94513094	C	G	0.09821	0.0001249	0.1453	0.03763	0.601051	rs17020797	GRID2	0	intronic	1.161	6	14	15	1	0	1
3	rs147921627	4	94513952	C	G	0.07837	6.087e-05	0.1515	0.03752	0.764075	rs17020797	GRID2	0	intronic	0.872	7	9	15	1	0	1
3	rs369800509	4	94514113	A	C	0.07837	6.087e-05	0.1515	0.03752	0.764075	rs17020797	GRID2	0	intronic	1.719	7	9	15	1	0	1
3	rs143780748	4	94514874	G	C	0.07837	6.087e-05	0.1515	0.03752	0.721514	rs17020797	GRID2	0	intronic	0.205	6	9	15	1	0	1
3	4:94515719	4	94515719	G	A	0.07738	6.087e-05	0.1515	0.03752	0.775588	rs17020797	GRID2	0	intronic	0.301	NA	9	15	1	0	1
3	rs142012662	4	94515836	G	A	0.07738	6.087e-05	0.1515	0.03752	0.775588	rs17020797	GRID2	0	intronic	0.452	7	9	15	1	0	1
3	rs141010710	4	94517622	G	T	0.0754	6.706e-05	0.1509	0.03761	0.755282	rs17020797	GRID2	0	intronic	4.547	6	9	15	1	0	1
3	rs67004210	4	94518636	G	A	0.0754	6.706e-05	0.1509	0.03761	0.755282	rs17020797	GRID2	0	intronic	2.171	7	9	15	1	0	1
3	rs59459811	4	94521393	A	T	0.07738	7.731e-05	0.1504	0.0378	0.732501	rs17020797	GRID2	0	intronic	0.036	6	9	15	1	0	1
3	rs58200946	4	94521813	C	T	0.0744	6.533e-05	0.1511	0.03758	0.744955	rs17020797	GRID2	0	intronic	0.487	NA	7	15	1	0	1
3	rs58107339	4	94522365	T	A	0.0754	6.249e-05	0.1513	0.03754	0.755282	rs17020797	GRID2	0	intronic	11.62	7	9	15	1	0	1
3	rs56201865	4	94523546	G	T	0.0754	6.533e-05	0.1511	0.03758	0.755282	rs17020797	GRID2	0	intronic	1.634	5	9	15	1	0	1
3	rs61633568	4	94524342	C	G	0.07937	5.957e-05	0.1521	0.03762	0.752829	rs17020797	GRID2	0	intronic	1.29	7	9	15	1	0	1
3	rs57482846	4	94525157	T	C	0.07738	5.957e-05	0.1521	0.03762	0.732501	rs17020797	GRID2	0	intronic	7.227	7	9	15	1	0	1
3	rs72670671	4	94525405	A	T	0.0754	6.087e-05	0.1515	0.03752	0.755282	rs17020797	GRID2	0	intronic	2.662	7	9	15	1	0	1
3	rs72670672	4	94525784	G	C	0.0754	6.087e-05	0.1515	0.03752	0.755282	rs17020797	GRID2	0	intronic	9.098	7	9	15	1	0	1
3	rs58147051	4	94527841	A	T	0.07738	5.957e-05	0.1521	0.03762	0.732501	rs17020797	GRID2	0	intronic	11.56	5	15	15	1	0	1
3	rs66791763	4	94528473	T	C	0.07738	5.957e-05	0.1521	0.03762	0.732501	rs17020797	GRID2	0	intronic	8.437	6	15	15	1	0	1
3	rs1435475	4	94528760	G	A	0.07738	5.548e-05	0.1524	0.03756	0.732501	rs17020797	GRID2	0	intronic	11.71	6	15	15	1	0	1
3	rs72670675	4	94528930	G	A	0.07738	5.402e-05	0.1526	0.03753	0.732501	rs17020797	GRID2	0	intronic	11.84	7	15	15	1	0	1
3	rs147879742	4	94533000	A	G	0.07639	6.087e-05	0.1515	0.03752	0.743754	rs17020797	GRID2	0	intronic	3.342	7	15	15	1	0	1
3	rs13111971	4	94535386	T	C	0.07738	5.402e-05	0.1526	0.03753	0.732501	rs17020797	GRID2	0	intronic	1.911	7	15	15	1	0	1
3	rs199912622	4	94535470	GC	G	0.07738	5.402e-05	0.1526	0.03753	0.732501	rs17020797	GRID2	0	intronic	1.325	NA	15	15	1	0	1
3	rs72670677	4	94535797	G	A	0.0754	6.087e-05	0.1515	0.03752	0.755282	rs17020797	GRID2	0	intronic	5.293	6	15	15	1	0	1
3	rs72670682	4	94536884	G	A	0.0754	8.064e-05	0.1486	0.03744	0.755282	rs17020797	GRID2	0	intronic	8.117	6	9	15	1	0	1
3	rs16996403	4	94537120	A	G	0.07639	8.064e-05	0.1486	0.03744	0.743754	rs17020797	GRID2	0	intronic	8.405	7	9	15	1	0	1
4	rs76030196	5	131631494	C	A	0.09821	0.001326	0.1212	0.03759	0.746751	rs60934439	SLC22A4	0	intronic	6.328	4	1	2	1	1	1
4	rs60934439	5	131639843	A	G	0.129	2.876e-06	0.181	0.03831	1	rs60934439	SLC22A4	0	intronic	8.815	4	4	15	1	1	1
4	rs78721012	5	131641726	A	G	0.09821	0.0009947	0.1245	0.03765	0.746751	rs60934439	SLC22A4	0	intronic	9.831	3a	5	15	1	1	1
4	rs3792881	5	131645105	C	T	0.09821	0.001394	0.1209	0.03766	0.746751	rs60934439	SLC22A4	0	intronic	2.847	5	5	15	1	1	1
4	rs75539158	5	131648592	C	T	0.09821	0.001394	0.1209	0.03766	0.746751	rs60934439	SLC22A4:AC034220.3	0:0	ncRNA_intronic	3.857	6	4	5	1	1	1
4	rs3792884	5	131651261	A	G	0.09821	0.001394	0.1209	0.03766	0.746751	rs60934439	SLC22A4:AC034220.3	0:0	ncRNA_intronic	2.237	4	3	5	1	1	1
4	rs150191101	5	131674707	T	C	0.1002	0.0007722	0.127	0.0376	0.728468	rs60934439	SLC22A4:AC034220.3	0:0	ncRNA_intronic	1.567	7	4	5	1	1	1
4	rs77318058	5	131696983	T	C	0.09821	0.0007078	0.1277	0.03752	0.746751	rs60934439	AC034220.3	0	ncRNA_intronic	6.108	7	4	5	1	1	1
4	rs10515456	5	131699669	G	A	0.09821	0.0007078	0.1277	0.03752	0.746751	rs60934439	AC034220.3	0	ncRNA_intronic	1.488	5	2	5	1	1	1
4	rs75817769	5	131707365	A	G	0.09821	0.0007078	0.1277	0.03752	0.746751	rs60934439	SLC22A5	0	intronic	6.241	2b	1	7	1	1	1
4	rs34741321	5	131717423	G	A	0.09821	0.0007078	0.1277	0.03752	0.746751	rs60934439	SLC22A5	0	intronic	4.363	3a	4	5	1	1	1
4	rs78399358	5	131719696	C	G	0.09821	0.0007078	0.1277	0.03752	0.746751	rs60934439	SLC22A5	0	intronic	1.424	5	4	5	1	1	1
4	rs274555	5	131722951	T	C	0.1062	0.0001941	0.1422	0.03793	0.648272	rs60934439	SLC22A5	0	intronic	6.832	1f	2	7	1	1	1
4	rs274554	5	131724950	C	T	0.09821	0.0006801	0.1281	0.0375	0.712527	rs60934439	SLC22A5	0	intronic	0.92	NA	2	5	1	1	1
4	rs274553	5	131725832	C	G	0.09821	0.0006801	0.1281	0.0375	0.712527	rs60934439	SLC22A5	0	intronic	3.066	4	2	5	1	1	1
4	rs274552	5	131727346	C	G	0.09821	0.0006801	0.1281	0.0375	0.712527	rs60934439	SLC22A5	0	intronic	3.596	5	4	5	1	1	1
4	rs274551	5	131727680	C	T	0.09821	0.0006801	0.1281	0.0375	0.712527	rs60934439	SLC22A5	0	intronic	0.026	2b	4	5	1	1	1
4	rs274549	5	131729118	C	A	0.09821	0.0006801	0.1281	0.0375	0.712527	rs60934439	SLC22A5	0	intronic	1.628	NA	4	4	1	1	1
4	rs60522531	5	131730052	C	CA	0.09821	0.0006801	0.1281	0.0375	0.712527	rs60934439	SLC22A5	0	UTR3	1.493	NA	4	4	1	1	1
4	rs274548	5	131730807	C	T	0.09821	0.0006801	0.1281	0.0375	0.712527	rs60934439	SLC22A5	0	UTR3	9.327	NA	4	5	1	1	1
4	rs144261584	5	131730923	AC	A	0.09821	0.0006801	0.1281	0.0375	0.712527	rs60934439	SLC22A5	0	UTR3	0.872	NA	4	5	1	0	1
4	rs274547	5	131731304	T	A	0.09821	0.0006801	0.1281	0.0375	0.712527	rs60934439	SLC22A5	0	UTR3	15.24	7	4	5	1	1	1
4	rs372458245	5	131737560	CAGCACATCAAAA	C	0.09821	0.0006801	0.1281	0.0375	0.712527	rs60934439	SLC22A5	6253	intergenic	10.69	NA	5	15	1	1	1
4	rs4705941	5	131740448	C	T	0.09821	0.0006679	0.1284	0.03755	0.712527	rs60934439	C5orf56	5879	intergenic	0.061	6	5	15	1	1	1
4	rs2897160	5	131741498	T	C	0.09821	0.0006801	0.1281	0.0375	0.712527	rs60934439	C5orf56	4829	intergenic	3.042	4	5	15	1	1	1
4	rs6596075	5	131742228	C	G	0.09821	0.0006801	0.1281	0.0375	0.712527	rs60934439	C5orf56	4099	intergenic	1.381	1f	5	15	1	1	1
5	rs6902848	6	18144430	T	A	0.119	2.615e-06	0.1763	0.03718	1	rs6902848	TPMT	0	intronic	6.854	6	4	5	1	1	1
5	6:18146039	6	18146039	T	C	0.12	4.047e-06	0.1728	0.03716	0.990021	rs6902848	TPMT	0	intronic	6.932	6	4	5	1	1	1
5	rs72839188	6	18146673	C	T	0.12	4.047e-06	0.1728	0.03716	0.990021	rs6902848	TPMT	0	intronic	2.15	6	4	5	1	1	1
5	kgp4387526	6	18152421	G	A	0.1071	0.0002034	0.1401	0.03748	0.86345	rs6902848	TPMT	0	intronic	0.376	6	5	5	1	1	1
5	rs146172059	6	18158286	C	T	0.119	0.0003709	0.1355	0.03785	0.864152	rs6902848	KDM1B	0	intronic	6.626	6	5	5	1	1	1
5	rs12664350	6	18161817	C	T	0.119	0.002751	0.1145	0.03807	0.864152	rs6902848	KDM1B	0	intronic	12.82	2b	4	4	1	1	1
5	rs12664844	6	18163516	C	T	0.119	0.003546	0.1111	0.03796	0.864152	rs6902848	KDM1B	0	intronic	0.178	7	4	4	1	1	1
5	rs12665237	6	18164552	C	G	0.119	0.003546	0.1111	0.03796	0.864152	rs6902848	KDM1B	0	intronic	0.148	7	4	4	1	1	1
5	rs55801031	6	18166260	T	A	0.1438	0.03793	0.07955	0.03824	0.690202	rs6902848	KDM1B	0	intronic	0.16	3a	4	5	1	1	1
5	rs138907444	6	18174085	C	T	0.1429	0.03793	0.07955	0.03824	0.681062	rs6902848	KDM1B	0	intronic	1.317	7	4	5	1	1	1
5	rs140242930	6	18174473	C	CT	0.1419	0.03859	0.07936	0.03828	0.656954	rs6902848	KDM1B	0	intronic	0.803	NA	4	5	1	0	1
5	rs112230930	6	18176718	C	G	0.1429	0.04426	0.07637	0.03789	0.665964	rs6902848	KDM1B	0	intronic	2.696	4	4	5	1	1	1
5	rs143343282	6	18176795	C	A	0.1429	0.04426	0.07637	0.03789	0.665964	rs6902848	KDM1B	0	intronic	0.521	7	4	5	1	1	1
5	rs147981051	6	18176796	C	A	0.1429	0.04426	0.07637	0.03789	0.665964	rs6902848	KDM1B	0	intronic	5.384	7	4	5	1	1	1
5	rs58600716	6	18177411	T	C	0.1429	0.04546	0.07577	0.0378	0.665964	rs6902848	KDM1B	0	intronic	6.374	6	2	5	1	1	1
5	rs67711903	6	18178480	AT	A	0.1419	0.03976	0.07775	0.03773	0.656954	rs6902848	KDM1B	0	intronic	0.578	NA	5	5	1	1	1
5	rs6904025	6	18178858	G	A	0.1419	0.03976	0.07775	0.03773	0.656954	rs6902848	KDM1B	0	intronic	6.421	6	5	5	1	1	1
5	rs6927693	6	18179110	A	G	0.1419	0.03976	0.07775	0.03773	0.656954	rs6902848	KDM1B	0	intronic	8	5	2	5	1	1	1
5	rs60761025	6	18179270	T	A	0.1419	0.03976	0.07775	0.03773	0.656954	rs6902848	KDM1B	0	intronic	3.334	5	2	5	1	1	1
5	6:18180005	6	18180005	C	T	0.1419	0.04322	0.07638	0.03771	0.656954	rs6902848	KDM1B	0	intronic	6.404	6	2	5	1	1	1
5	rs58897247	6	18180584	T	G	0.1419	0.04322	0.07638	0.03771	0.656954	rs6902848	KDM1B	0	intronic	9.676	7	2	5	1	1	1
5	rs12664214	6	18181345	C	T	0.1419	0.04322	0.07638	0.03771	0.656954	rs6902848	KDM1B	0	intronic	0.214	6	4	5	1	1	1
5	rs12665749	6	18181374	A	G	0.1419	0.04322	0.07638	0.03771	0.656954	rs6902848	KDM1B	0	intronic	10.74	6	4	5	1	1	1
5	6:18181638	6	18181638	T	C	0.1419	0.04322	0.07638	0.03771	0.656954	rs6902848	KDM1B	0	intronic	0.681	7	4	5	1	1	1
5	rs12207405	6	18181764	A	G	0.1419	0.04322	0.07638	0.03771	0.656954	rs6902848	KDM1B	0	intronic	3.77	7	4	5	1	1	1
5	rs12208906	6	18181892	T	C	0.1429	0.04322	0.07638	0.03771	0.651035	rs6902848	KDM1B	0	intronic	0.959	5	4	5	1	1	1
5	rs72840608	6	18186591	A	G	0.1429	0.04049	0.07753	0.03777	0.665964	rs6902848	KDM1B	0	intronic	0.572	4	2	5	1	1	1
5	rs70974710	6	18190383	GAAAA	GAAA	0.1438	0.02957	0.08259	0.03787	0.64519	rs6902848	KDM1B	0	intronic	NA	NA	4	5	1	0	1
5	rs9477664	6	18190957	C	T	0.1438	0.03832	0.07844	0.03779	0.663898	rs6902848	KDM1B	0	intronic	2.152	6	4	5	1	1	1
6	rs5884297	7	53130770	T	G	0.08433	8.646e-06	0.1732	0.03859	1	rs5884297	POM121L12	26152	intergenic	0.728	5	7	15	0	0	1
6	rs73698780	7	53130775	T	G	0.1131	7.193e-05	0.1564	0.03911	0.685492	rs5884297	POM121L12	26157	intergenic	1.525	5	7	15	0	0	1
6	rs1174756	7	53137595	T	C	0.08631	0.0001441	0.1458	0.03811	0.900096	rs5884297	POM121L12	32977	intergenic	0.266	5	9	15	0	0	1
6	rs1153882	7	53152169	G	A	0.0873	0.0001955	0.1424	0.038	0.891344	rs5884297	POM121L12	47551	intergenic	1.557	7	9	15	0	0	1
6	rs7782134	7	53154944	C	T	0.0873	0.0001922	0.1426	0.03801	0.891344	rs5884297	POM121L12	50326	intergenic	2.013	6	8	15	0	0	1
6	rs4947420	7	53167864	C	T	0.08631	7.753e-05	0.1489	0.03742	0.878138	rs5884297	POM121L12	63246	intergenic	0.354	3a	7	15	0	0	1
7	rs1348744	9	12100971	T	A	0.2202	3.573e-05	0.1568	0.03766	0.872456	rs10809696	RP11-74C3.1	0	ncRNA_intronic	3.283	7	5	15	1	0	1
7	rs1348742	9	12101436	G	A	0.2163	2.388e-05	0.1597	0.03752	0.856392	rs10809696	RP11-74C3.1	0	ncRNA_intronic	1.178	NA	5	9	1	0	1
7	rs10809696	9	12104635	G	A	0.1954	3.074e-06	0.1766	0.0375	1	rs10809696	RP11-74C3.1	0	ncRNA_intronic	7.615	7	9	15	1	0	1
7	rs11515183	9	12107758	A	G	0.2232	2.92e-05	0.1588	0.03772	0.835331	rs10809696	RP11-74C3.1	0	ncRNA_intronic	1.821	7	9	15	1	0	1
7	rs79198774	9	12109569	C	A	0.1349	0.003404	0.1107	0.03765	0.654005	rs10809696	RP11-74C3.1	0	ncRNA_intronic	5.13	5	9	15	1	0	1
7	rs10960487	9	12122223	T	G	0.2183	1.413e-05	0.1634	0.03734	0.804114	rs10809696	RP11-74C3.1	0	ncRNA_intronic	2.574	6	9	15	1	0	1
7	rs60793136	9	12131156	TTCTTTC	T	0.2163	1.819e-05	0.1619	0.03748	0.810339	rs10809696	RP11-74C3.1	0	ncRNA_intronic	8.978	NA	9	15	1	0	1
7	rs10960493	9	12131415	A	C	0.248	6.699e-05	0.1507	0.03754	0.659023	rs10809696	RP11-74C3.1	0	ncRNA_intronic	7.495	7	9	15	1	0	1
7	rs2382320	9	12144158	C	T	0.2143	5.519e-05	0.153	0.03766	0.760414	rs10809696	RP11-74C3.1	0	ncRNA_intronic	1.009	6	9	15	1	0	1
7	rs17174901	9	12163015	A	T	0.1379	0.002377	0.1149	0.03767	0.608623	rs10809696	RP11-74C3.1	3867	intergenic	0.452	5	5	15	1	0	1
7	rs10809719	9	12199536	C	A	0.2212	0.000166	0.1453	0.03834	0.771422	rs10809696	RP11-74C3.1	40388	intergenic	0.474	6	5	15	0	0	1
7	rs13286322	9	12200828	A	T	0.2222	6.551e-05	0.1553	0.03863	0.766959	rs10809696	RP11-74C3.1	41680	intergenic	0.101	5	7	15	0	0	1
7	rs10960522	9	12202003	T	G	0.2242	6.675e-05	0.1547	0.03852	0.760061	rs10809696	RP11-74C3.1	42855	intergenic	0.616	5	5	15	0	0	1
7	rs10960525	9	12205729	G	C	0.2212	0.0003413	0.1399	0.03883	0.747266	rs10809696	RP11-74C3.1	46581	intergenic	0.378	6	9	15	0	0	1
7	rs12352297	9	12209664	C	A	0.2173	0.0001387	0.1505	0.03923	0.72664	rs10809696	RP11-74C3.1	50516	intergenic	2.775	7	9	15	0	0	1
7	rs2382347	9	12213613	A	G	0.2143	NA	NA	NA	0.724186	rs10809696	RP11-74C3.1	54465	intergenic	4.944	NA	7	15	0	0	1
8	10:1513971	10	1513971	A	G	0.03274	6.098e-06	0.1702	0.03731	1	10:1513971	ADARB2	0	intronic	4.671	7	5	15	1	0	1
9	rs112029242	11	38616629	A	C	0.1905	2.75e-06	0.1798	0.03798	0.866454	rs983360	RP11-277K23.1	23184	intergenic	2.247	3a	5	15	0	0	1
9	rs79375628	11	38616999	A	G	0.1905	2.75e-06	0.1798	0.03798	0.866454	rs983360	RP11-277K23.1	22814	intergenic	2.874	5	5	15	0	0	1
9	rs111757012	11	38617128	A	G	0.1905	2.75e-06	0.1798	0.03798	0.866454	rs983360	RP11-277K23.1	22685	intergenic	4.878	5	5	15	0	0	1
9	rs112639269	11	38617585	C	T	0.1905	3.124e-06	0.1786	0.03795	0.866454	rs983360	RP11-277K23.1	22228	intergenic	0.996	7	5	15	0	0	1
9	rs10837021	11	38618259	T	C	0.4444	NA	NA	NA	0.813189	rs983360	RP11-277K23.1	21554	intergenic	2.012	7	5	15	0	1	1
9	rs1481298	11	38619003	T	C	0.4454	NA	NA	NA	0.817531	rs983360	RP11-277K23.1	20810	intergenic	0.674	6	5	15	0	1	1
9	rs1481299	11	38619007	A	G	0.4454	NA	NA	NA	0.817531	rs983360	RP11-277K23.1	20806	intergenic	0.193	7	5	15	0	1	1
9	rs1038254	11	38619740	G	T	0.4454	NA	NA	NA	0.817531	rs983360	RP11-277K23.1	20073	intergenic	4.062	6	5	15	0	1	1
9	rs7925751	11	38622343	C	A	0.4454	NA	NA	NA	0.817531	rs983360	RP11-277K23.1	17470	intergenic	0.558	6	14	15	0	1	1
9	rs4755497	11	38622409	G	A	0.4454	NA	NA	NA	0.817531	rs983360	RP11-277K23.1	17404	intergenic	2.181	6	14	15	0	1	1
9	rs11034878	11	38623019	C	A	0.4454	NA	NA	NA	0.817531	rs983360	RP11-277K23.1	16794	intergenic	7.836	5	9	15	0	1	1
9	rs11034883	11	38626431	G	T	0.4454	NA	NA	NA	0.817531	rs983360	RP11-277K23.1	13382	intergenic	4.359	7	9	15	0	1	1
9	rs7123927	11	38626924	G	C	0.4454	NA	NA	NA	0.817531	rs983360	RP11-277K23.1	12889	intergenic	1.427	6	9	15	0	1	1
9	rs7124095	11	38627101	G	A	0.4454	NA	NA	NA	0.817531	rs983360	RP11-277K23.1	12712	intergenic	2.761	6	9	15	0	1	1
9	rs2127963	11	38627409	A	G	0.4454	NA	NA	NA	0.817531	rs983360	RP11-277K23.1	12404	intergenic	2.118	6	9	15	0	1	1
9	rs11034885	11	38630643	G	A	0.4464	NA	NA	NA	0.82104	rs983360	RP11-277K23.1	9170	intergenic	3.002	7	9	15	1	1	1
9	rs10501203	11	38635440	T	A	0.4464	NA	NA	NA	0.82104	rs983360	RP11-277K23.1	4373	intergenic	5.125	6	9	15	1	1	1
9	rs4756453	11	38642229	G	A	0.4018	NA	NA	NA	0.973766	rs983360	RP11-277K23.1	0	ncRNA_intronic	5.603	6	9	15	1	1	1
9	rs7126186	11	38645537	T	C	0.4018	NA	NA	NA	0.973766	rs983360	RP11-277K23.1	0	ncRNA_intronic	1.383	7	15	15	1	1	1
9	rs7126493	11	38645671	A	G	0.4018	NA	NA	NA	0.973766	rs983360	RP11-277K23.1	0	ncRNA_intronic	2.888	7	15	15	1	1	1
9	rs67432071	11	38647780	G	GA	0.4018	NA	NA	NA	0.973766	rs983360	RP11-277K23.1	0	ncRNA_intronic	0.072	NA	15	15	1	1	1
9	rs10742435	11	38647805	G	A	0.4018	NA	NA	NA	0.973766	rs983360	RP11-277K23.1	0	ncRNA_intronic	1.331	6	15	15	1	1	1
9	rs2054583	11	38648159	A	G	0.4008	NA	NA	NA	0.97003	rs983360	RP11-277K23.1	0	ncRNA_intronic	0.099	NA	15	15	1	1	1
9	rs983360	11	38648413	G	T	0.1845	1.815e-06	0.1847	0.03832	1	rs983360	RP11-277K23.1	0	ncRNA_intronic	0.844	NA	15	15	1	0	1
9	rs1825117	11	38649083	C	T	0.4018	NA	NA	NA	0.973766	rs983360	RP11-277K23.1	0	ncRNA_intronic	0.519	NA	15	15	1	1	1
9	rs1600734	11	38650892	G	A	0.4018	NA	NA	NA	0.973766	rs983360	RP11-277K23.1	0	ncRNA_intronic	4.346	NA	9	15	1	1	1
9	rs6485009	11	38653588	A	G	0.4018	NA	NA	NA	0.973766	rs983360	RP11-277K23.1	0	ncRNA_intronic	0.379	7	9	15	1	1	1
9	rs1842611	11	38655243	G	A	0.4028	NA	NA	NA	0.969862	rs983360	RP11-277K23.1	0	ncRNA_intronic	0.009	NA	9	15	1	1	1
9	rs1600732	11	38659006	G	T	0.3403	NA	NA	NA	0.752833	rs983360	RP11-277K23.1	0	ncRNA_intronic	1.755	NA	9	15	1	1	1
9	rs1600731	11	38660762	T	C	0.3413	NA	NA	NA	0.748705	rs983360	RP11-277K23.1	0	ncRNA_intronic	2.656	NA	9	15	1	1	1
9	rs2861287	11	38662902	T	A	0.4028	NA	NA	NA	0.969862	rs983360	RP11-277K23.1	0	ncRNA_intronic	3.723	7	9	15	1	1	1
9	rs2861288	11	38663035	A	C	0.4464	NA	NA	NA	0.82021	rs983360	RP11-277K23.1	0	ncRNA_intronic	0.935	7	9	15	1	1	1
9	rs2861289	11	38663186	C	G	0.3413	NA	NA	NA	0.748705	rs983360	RP11-277K23.1	0	ncRNA_intronic	0.819	7	9	15	1	1	1
9	rs1585962	11	38664557	C	T	0.4028	NA	NA	NA	0.969862	rs983360	RP11-277K23.1	0	ncRNA_intronic	2.982	NA	9	15	1	1	1
9	rs1585961	11	38664589	G	A	0.3413	NA	NA	NA	0.748705	rs983360	RP11-277K23.1	0	ncRNA_intronic	3.351	NA	9	15	1	1	1
9	rs10837028	11	38664978	T	G	0.4028	NA	NA	NA	0.969862	rs983360	RP11-277K23.1	0	ncRNA_intronic	0.19	6	9	15	1	1	1
9	rs1481287	11	38665072	G	A	0.4028	NA	NA	NA	0.969862	rs983360	RP11-277K23.1	0	ncRNA_intronic	3.823	NA	9	15	1	1	1
9	rs1481285	11	38665276	C	A	0.3413	NA	NA	NA	0.748705	rs983360	RP11-277K23.1	0	ncRNA_intronic	1.063	NA	9	15	1	1	1
9	rs7105885	11	38665637	T	C	0.4028	NA	NA	NA	0.969862	rs983360	RP11-277K23.1	0	ncRNA_intronic	0.043	7	9	15	1	1	1
9	rs1481284	11	38666036	C	T	0.4028	NA	NA	NA	0.969862	rs983360	RP11-277K23.1	0	ncRNA_intronic	4.342	NA	9	15	1	1	1
9	rs1154677	11	38666768	G	T	0.4028	NA	NA	NA	0.969862	rs983360	RP11-277K23.1	0	ncRNA_intronic	7.24	NA	9	15	1	1	1
9	rs1481282	11	38667388	T	G	0.3413	NA	NA	NA	0.748705	rs983360	RP11-277K23.1	0	ncRNA_intronic	0.367	NA	9	15	1	1	1
9	rs1552113	11	38667899	A	G	0.4028	NA	NA	NA	0.969862	rs983360	RP11-277K23.1	0	ncRNA_exonic	0.314	NA	7	15	1	1	1
9	rs1383742	11	38670256	T	C	0.4028	NA	NA	NA	0.969862	rs983360	RP11-64I17.1	0	ncRNA_intronic	1.59	NA	7	15	1	1	1
9	rs1383741	11	38670343	C	T	0.3413	NA	NA	NA	0.748705	rs983360	RP11-64I17.1	0	ncRNA_exonic	3.572	NA	7	15	1	1	1
9	rs2199986	11	38671526	A	G	0.3532	NA	NA	NA	0.776135	rs983360	RP11-64I17.1	0	ncRNA_intronic	0.92	NA	5	15	1	0	1
9	rs2199985	11	38671650	C	A	0.3452	NA	NA	NA	0.730454	rs983360	RP11-64I17.1	0	ncRNA_intronic	1.412	NA	5	15	1	0	1
9	rs7112593	11	38671958	C	G	0.4028	NA	NA	NA	0.969862	rs983360	RP11-64I17.1	0	ncRNA_intronic	0.875	7	5	15	1	1	1
9	rs11034905	11	38673443	A	G	0.2887	NA	NA	NA	0.623568	rs983360	RP11-64I17.1	0	ncRNA_intronic	4.706	7	5	15	1	1	1
9	rs3736130	11	38674299	A	G	0.2887	NA	NA	NA	0.623568	rs983360	RP11-64I17.1	0	ncRNA_intronic	3.336	NA	5	15	1	1	1
9	rs3736129	11	38674332	G	A	0.4028	NA	NA	NA	0.969862	rs983360	RP11-64I17.1	0	ncRNA_intronic	0.452	NA	5	15	1	1	1
9	rs3736128	11	38674440	T	C	0.2887	NA	NA	NA	0.623568	rs983360	RP11-64I17.1	0	ncRNA_intronic	1.843	NA	5	15	1	1	1
9	rs3736127	11	38674480	G	A	0.2887	NA	NA	NA	0.623568	rs983360	RP11-64I17.1	0	ncRNA_intronic	5.852	NA	5	15	1	1	1
9	rs535341244	11	38674506	CT	C	0.0009921	NA	NA	NA	0.623568	rs983360	RP11-64I17.1	0	ncRNA_intronic	0.113	NA	5	15	1	0	1
9	rs3736126	11	38674506	CT	TT	0.2887	NA	NA	NA	0.623568	rs983360	RP11-64I17.1	0	NA	NA	NA	5	15	1	0	1
9	rs1038263	11	38674871	C	T	0.2887	NA	NA	NA	0.623568	rs983360	RP11-64I17.1	0	ncRNA_intronic	1.546	NA	5	15	1	1	1
9	rs1038262	11	38674986	A	G	0.2887	NA	NA	NA	0.623568	rs983360	RP11-64I17.1	0	ncRNA_intronic	0.453	NA	5	15	1	0	1
9	rs1038261	11	38675076	A	T	0.2857	NA	NA	NA	0.618979	rs983360	RP11-64I17.1	0	ncRNA_intronic	8.049	6	5	15	1	0	1
9	rs1038260	11	38675107	T	C	0.2857	NA	NA	NA	0.618979	rs983360	RP11-64I17.1	0	ncRNA_intronic	0.188	NA	5	15	1	0	1
9	rs1038259	11	38675114	A	C	0.2857	NA	NA	NA	0.618979	rs983360	RP11-64I17.1	0	ncRNA_intronic	0.997	NA	5	15	1	0	1
9	rs7111521	11	38675327	C	T	0.4028	NA	NA	NA	0.969862	rs983360	RP11-64I17.1	0	ncRNA_intronic	1.991	4	5	15	1	1	1
9	rs73445248	11	38675644	T	C	0.2887	NA	NA	NA	0.623568	rs983360	RP11-64I17.1	0	ncRNA_intronic	2.23	5	7	15	1	1	1
9	rs2291206	11	38676191	A	G	0.2887	NA	NA	NA	0.623568	rs983360	RP11-64I17.1	0	ncRNA_intronic	1.292	NA	9	15	1	1	1
9	rs2291204	11	38676579	C	A	0.2887	NA	NA	NA	0.623568	rs983360	RP11-64I17.1	0	ncRNA_exonic	7.079	NA	9	15	1	1	1
9	rs2291203	11	38676665	G	A	0.2887	NA	NA	NA	0.623568	rs983360	RP11-64I17.1	0	ncRNA_exonic	8.266	NA	9	15	1	1	1
9	rs12282372	11	38677990	C	T	0.2887	NA	NA	NA	0.623568	rs983360	RP11-64I17.1	0	ncRNA_intronic	1.798	6	9	15	1	1	1
9	rs12290743	11	38678168	T	G	0.4028	NA	NA	NA	0.969862	rs983360	RP11-64I17.1	0	ncRNA_intronic	7.527	6	9	15	1	1	1
9	rs12270561	11	38678213	A	G	0.2887	NA	NA	NA	0.623568	rs983360	RP11-64I17.1	0	ncRNA_intronic	5.175	7	9	15	1	1	1
9	rs12283968	11	38678267	G	A	0.2887	NA	NA	NA	0.623568	rs983360	RP11-64I17.1	0	ncRNA_intronic	3.962	6	9	15	1	1	1
9	rs12283976	11	38678350	G	A	0.2887	NA	NA	NA	0.623568	rs983360	RP11-64I17.1	0	ncRNA_intronic	9.586	6	9	15	1	1	1
9	rs11034907	11	38678710	C	T	0.2887	NA	NA	NA	0.623568	rs983360	RP11-64I17.1	0	ncRNA_intronic	0.149	5	9	15	1	1	1
9	rs11034908	11	38678727	C	T	0.2887	NA	NA	NA	0.623568	rs983360	RP11-64I17.1	0	ncRNA_intronic	3.046	5	9	15	1	1	1
9	rs36059706	11	38679263	G	GC	0.4028	NA	NA	NA	0.969862	rs983360	RP11-64I17.1	0	ncRNA_intronic	0.757	NA	15	15	1	0	1
9	rs10837030	11	38679547	A	G	0.4028	NA	NA	NA	0.969862	rs983360	RP11-64I17.1	0	ncRNA_intronic	0.837	6	15	15	1	1	1
9	rs1383738	11	38680183	A	G	0.4097	NA	NA	NA	0.94407	rs983360	RP11-64I17.1	0	ncRNA_intronic	4.459	NA	15	15	1	1	1
9	rs1354429	11	38681306	T	C	0.2897	NA	NA	NA	0.619976	rs983360	RP11-64I17.1	0	ncRNA_intronic	0.083	7	15	15	1	1	1
9	rs1354430	11	38681358	C	A	0.4097	NA	NA	NA	0.94407	rs983360	RP11-64I17.1	0	ncRNA_intronic	0.376	6	15	15	1	1	1
9	rs1354431	11	38681481	G	C	0.2897	NA	NA	NA	0.619976	rs983360	RP11-64I17.1	0	ncRNA_intronic	0.32	7	15	15	1	1	1
9	rs11394909	11	38681624	CA	C	0.4097	NA	NA	NA	0.94407	rs983360	RP11-64I17.1	0	ncRNA_intronic	2.389	NA	15	15	1	1	1
9	rs767686	11	38682553	T	G	0.4097	NA	NA	NA	0.94407	rs983360	RP11-64I17.1	0	ncRNA_intronic	1.184	NA	9	15	1	1	1
9	rs1383737	11	38682749	G	T	0.2897	NA	NA	NA	0.619976	rs983360	RP11-64I17.1	0	ncRNA_intronic	2.538	NA	9	15	1	1	1
9	rs1026835	11	38684761	T	C	0.4524	NA	NA	NA	0.79218	rs983360	RP11-64I17.1	0	ncRNA_intronic	3.137	NA	15	15	1	1	1
9	rs1383736	11	38685218	G	T	0.4524	NA	NA	NA	0.79218	rs983360	RP11-64I17.1	0	ncRNA_intronic	0.405	NA	9	15	1	1	1
9	rs2861291	11	38687043	C	A	0.4524	NA	NA	NA	0.79218	rs983360	RP11-64I17.1	0	ncRNA_intronic	1.949	6	15	15	1	0	1
9	rs72399850	11	38687050	TAC	T	0.4921	NA	NA	NA	0.664073	rs983360	RP11-64I17.1	0	ncRNA_intronic	0.403	NA	15	15	1	0	1
9	rs2861292	11	38687367	A	G	0.4554	NA	NA	NA	0.783736	rs983360	RP11-64I17.1	0	ncRNA_intronic	1.608	7	9	15	1	1	1
9	rs10437637	11	38688814	C	G	0.1845	0.0001009	0.1514	0.03866	0.873075	rs983360	RP11-64I17.1	0	ncRNA_intronic	0.252	7	7	15	1	0	1
9	rs10837031	11	38691135	T	C	0.1855	0.000121	0.1494	0.0386	0.86804	rs983360	RP11-64I17.1	0	ncRNA_intronic	0.697	6	9	15	1	0	1
9	rs4756458	11	38694810	G	A	0.1825	0.0002784	0.1401	0.03831	0.873786	rs983360	RP11-64I17.1	0	ncRNA_intronic	1.715	6	9	15	1	0	1
9	rs4756459	11	38695623	G	T	0.1825	0.0002784	0.1401	0.03831	0.873786	rs983360	RP11-64I17.1	0	ncRNA_intronic	0.948	6	9	15	1	0	1
9	rs1825115	11	38696903	G	T	0.1825	0.0002784	0.1401	0.03831	0.873786	rs983360	RP11-64I17.1	1111	intergenic	2.701	7	9	15	1	0	1
9	rs1481281	11	38698255	G	C	0.1815	0.0002784	0.1401	0.03831	0.878996	rs983360	RP11-64I17.1	2463	intergenic	0.517	5	9	15	1	0	1
9	rs1995497	11	38699583	T	A	0.1815	0.0002784	0.1401	0.03831	0.878996	rs983360	RP11-64I17.1	3791	intergenic	6.739	6	9	15	1	0	1
9	rs10501206	11	38699830	G	A	0.1815	0.0002784	0.1401	0.03831	0.878996	rs983360	RP11-64I17.1	4038	intergenic	10.78	5	9	15	1	0	1
9	rs10501207	11	38699994	G	A	0.1815	0.0002784	0.1401	0.03831	0.878996	rs983360	RP11-64I17.1	4202	intergenic	2.395	3a	9	15	1	0	1
9	rs10742437	11	38700909	G	C	0.1815	0.0002784	0.1401	0.03831	0.878996	rs983360	RP11-64I17.1	5117	intergenic	0.148	7	9	15	1	0	1
9	rs5791248	11	38701690	C	CA	0.1815	0.0002784	0.1401	0.03831	0.878996	rs983360	RP11-64I17.1	5898	intergenic	1.034	NA	9	15	1	0	1
9	rs7108257	11	38702842	G	T	0.1815	0.0002784	0.1401	0.03831	0.878996	rs983360	RP11-64I17.1	7050	intergenic	1.44	7	7	15	1	0	1
9	rs1910581	11	38703627	A	G	0.1815	0.0002784	0.1401	0.03831	0.878996	rs983360	RP11-64I17.1	7835	intergenic	0.412	NA	9	15	1	0	1
9	rs10768402	11	38709271	G	A	0.1815	0.0003243	0.1385	0.03831	0.866699	rs983360	RP11-64I17.1	13479	intergenic	5.56	7	14	15	0	0	1
9	rs4551738	11	38711817	G	A	0.1815	0.0003241	0.1386	0.03833	0.866699	rs983360	RP11-64I17.1	16025	intergenic	1.493	5	7	15	0	0	1
9	rs7480528	11	38712251	T	C	0.1815	0.0003241	0.1386	0.03833	0.866699	rs983360	RP11-64I17.1	16459	intergenic	1.721	5	7	15	0	0	1
9	rs1585965	11	38714559	T	C	0.1806	0.0003245	0.1384	0.03827	0.860541	rs983360	RP11-64I17.1	18767	intergenic	0.173	NA	5	15	0	0	1
9	rs1585964	11	38714648	T	G	0.1806	0.0003245	0.1384	0.03827	0.860541	rs983360	RP11-64I17.1	18856	intergenic	1.838	NA	5	15	0	0	1
9	rs1600736	11	38714926	A	G	0.1796	0.0003293	0.1381	0.03824	0.854417	rs983360	RP11-64I17.1	19134	intergenic	1.683	NA	9	15	0	0	1
10	12:5750791	12	5750791	T	C	0.1409	2.877e-06	0.1758	0.03724	1	12:5750791	ANO2	0	intronic	2.63	NA	5	15	1	0	1
10	rs2110166	12	5751342	C	T	0.1002	1.602e-05	0.1623	0.03733	0.712604	12:5750791	ANO2	0	intronic	1.301	7	5	15	1	0	1
10	rs76738883	12	5751818	T	C	0.1002	1.882e-05	0.1615	0.03745	0.712604	12:5750791	ANO2	0	intronic	4.811	6	5	15	1	0	1
10	rs12578184	12	5753010	G	C	0.1002	2.093e-05	0.1603	0.03739	0.712604	12:5750791	ANO2	0	intronic	0.71	6	5	15	1	0	1
10	rs17194568	12	5755517	C	T	0.1012	0.000269	0.1382	0.03772	0.718701	12:5750791	ANO2	0	intronic	0.399	7	5	15	1	0	1
10	rs75634927	12	5768444	G	T	0.08829	0.005707	0.1055	0.03803	0.627357	12:5750791	ANO2	0	intronic	1.603	5	5	15	1	0	1
10	rs7397902	12	5769595	A	G	0.09028	0.005707	0.1055	0.03803	0.638829	12:5750791	ANO2	0	intronic	4.008	4	5	15	1	0	1
10	rs3782624	12	5793570	G	A	0.125	0.03726	0.07901	0.03785	0.669366	12:5750791	ANO2	0	intronic	0.569	6	5	15	1	0	1
10	rs12580433	12	5800576	G	A	0.125	0.03898	0.07799	0.0377	0.669366	12:5750791	ANO2	0	intronic	0.562	5	5	15	1	0	1
10	rs4930785	12	5804167	G	A	0.1339	0.02723	0.08355	0.03775	0.633702	12:5750791	ANO2	0	intronic	0.849	5	5	15	1	0	1
11	rs56342226	12	114471920	T	C	0.07143	0.003071	0.1126	0.03788	0.607711	rs1001563	RP11-100F15.1	43017	intergenic	6.664	5	5	14	0	0	1
11	rs12423257	12	114474146	A	G	0.07143	0.004246	0.1086	0.03785	0.607711	rs1001563	RP11-100F15.1	40791	intergenic	1.93	5	5	14	0	0	1
11	rs113478793	12	114474602	C	T	0.07143	0.004246	0.1086	0.03785	0.607711	rs1001563	RP11-100F15.1	40335	intergenic	2.459	6	5	14	0	0	1
11	rs73210943	12	114487161	T	C	0.07242	0.005563	0.1052	0.03781	0.622485	rs1001563	RP11-100F15.1	27776	intergenic	1.581	7	5	15	0	0	1
11	rs17496984	12	114487582	T	C	0.07242	0.005583	0.1053	0.03786	0.622485	rs1001563	RP11-100F15.1	27355	intergenic	0.463	6	5	15	0	0	1
11	rs60771132	12	114489956	C	T	0.08333	0.0008861	0.1261	0.03774	0.713409	rs1001563	RP11-100F15.1	24981	intergenic	2.529	6	5	15	0	0	1
11	rs1076530	12	114492860	C	T	0.07837	0.0001915	0.1413	0.03765	0.792423	rs1001563	RP11-100F15.1	22077	intergenic	1.539	NA	9	15	0	1	1
11	rs1076532	12	114492958	A	T	0.07837	0.0001915	0.1413	0.03765	0.792423	rs1001563	RP11-100F15.1	21979	intergenic	1.519	3a	9	15	0	1	1
11	rs12423354	12	114493812	G	A	0.07837	0.0001222	0.1461	0.0378	0.792423	rs1001563	RP11-100F15.1	21125	intergenic	1.036	7	9	15	0	1	1
11	rs56372764	12	114495500	C	A	0.0873	0.0001854	0.1422	0.03781	0.700117	rs1001563	RP11-100F15.1	19437	intergenic	2.2	7	9	15	0	0	1
11	rs113534037	12	114498485	T	C	0.07837	0.0001194	0.1463	0.03777	0.792423	rs1001563	RP11-100F15.1	16452	intergenic	4.771	7	9	15	0	1	1
11	rs147067695	12	114499870	AG	A	0.07738	6.677e-05	0.1513	0.03768	0.803931	rs1001563	RP11-100F15.1	15067	intergenic	0.458	NA	5	15	0	1	1
11	rs141898949	12	114502609	T	TC	0.0744	1.496e-05	0.1632	0.03741	0.868983	rs1001563	RP11-100F15.1	12328	intergenic	0.592	NA	5	15	0	1	1
11	rs73210947	12	114503054	C	G	0.07639	1.601e-05	0.1627	0.03743	0.843795	rs1001563	RP11-100F15.1	11883	intergenic	1.132	5	5	15	0	1	1
11	rs149926298	12	114503230	G	A	0.07341	9.904e-06	0.1663	0.03733	0.852912	rs1001563	RP11-100F15.1	11707	intergenic	1.099	7	5	15	0	1	1
11	rs112650143	12	114503517	G	T	0.07341	9.904e-06	0.1663	0.03733	0.852912	rs1001563	RP11-100F15.1	11420	intergenic	0.887	6	5	15	0	1	1
11	rs59656855	12	114503542	G	A	0.07341	9.904e-06	0.1663	0.03733	0.852912	rs1001563	RP11-100F15.1	11395	intergenic	1.263	6	5	15	0	1	1
11	rs57888163	12	114503552	T	G	0.0754	1.065e-05	0.1658	0.03735	0.827809	rs1001563	RP11-100F15.1	11385	intergenic	1.769	6	5	15	0	1	1
11	rs58080911	12	114503927	A	G	0.07341	9.904e-06	0.1663	0.03733	0.852912	rs1001563	RP11-100F15.1	11010	intergenic	1.617	7	5	15	0	1	1
11	rs58237523	12	114504467	C	G	0.07341	9.904e-06	0.1663	0.03733	0.852912	rs1001563	RP11-100F15.1	10470	intergenic	0.677	6	5	15	0	1	1
11	rs73192906	12	114505789	A	T	0.07143	5.296e-05	0.1526	0.0375	0.909252	rs1001563	RP11-100F15.1	9148	intergenic	1.927	6	5	15	1	1	1
11	rs115141202	12	114508981	A	G	0.0744	1.496e-05	0.1632	0.03741	0.868983	rs1001563	RP11-100F15.1	5956	intergenic	4.097	7	5	15	1	1	1
11	rs17425172	12	114513770	G	A	0.09425	6.478e-05	0.1521	0.03781	0.646958	rs1001563	RP11-100F15.1	1167	intergenic	2.014	7	9	15	1	1	1
11	rs17497081	12	114514334	T	C	0.09425	6.478e-05	0.1521	0.03781	0.646958	rs1001563	RP11-100F15.1	603	upstream	0.896	6	9	15	1	1	1
11	rs73192910	12	114515119	G	A	0.0744	1.496e-05	0.1632	0.03741	0.868983	rs1001563	RP11-100F15.1	0	ncRNA_exonic	0.584	6	9	15	1	1	1
11	rs17425235	12	114516751	A	G	0.07639	1.601e-05	0.1627	0.03743	0.843795	rs1001563	RP11-100F15.1	0	ncRNA_intronic	4.719	7	9	15	1	1	1
11	rs12423389	12	114518268	G	A	0.0744	1.513e-05	0.1633	0.03744	0.868983	rs1001563	RP11-100F15.2	0	ncRNA_intronic	3.98	5	9	15	1	1	1
11	rs79785069	12	114519398	A	G	0.07341	5.617e-05	0.1522	0.03752	0.882061	rs1001563	RP11-100F15.2	0	ncRNA_intronic	2.81	7	13	15	1	1	1
11	rs12426484	12	114519782	C	A	0.07143	5.296e-05	0.1526	0.0375	0.909252	rs1001563	RP11-100F15.2	0	ncRNA_intronic	1.256	6	9	15	1	1	1
11	rs57619808	12	114520656	A	C	0.07341	5.617e-05	0.1522	0.03752	0.882061	rs1001563	RP11-100F15.2	0	ncRNA_intronic	0.336	7	9	15	1	1	1
11	rs147687094	12	114521617	AT	A	0.07242	5.296e-05	0.1526	0.0375	0.89548	rs1001563	RP11-100F15.2	0	ncRNA_intronic	0.671	NA	14	15	1	0	1
11	rs146371914	12	114523881	A	T	0.07341	5.617e-05	0.1522	0.03752	0.882061	rs1001563	RP11-100F15.2	0	ncRNA_intronic	4.796	7	14	15	1	1	1
11	rs73192969	12	114527795	G	A	0.07341	3.202e-05	0.1578	0.03766	0.882061	rs1001563	RP11-100F15.2	0	ncRNA_intronic	1.282	7	7	15	1	1	1
11	rs1037746	12	114529445	T	C	0.07143	2.986e-05	0.1583	0.03764	0.909252	rs1001563	RP11-100F15.2	0	ncRNA_intronic	0.797	6	7	15	1	1	1
11	rs60602378	12	114531129	C	T	0.07143	2.839e-05	0.1588	0.03765	0.909252	rs1001563	RP11-100F15.2	0	ncRNA_intronic	9.347	5	5	15	1	1	1
11	rs17497206	12	114537940	T	C	0.06944	4.389e-05	0.1554	0.03777	0.937912	rs1001563	RP11-100F15.2	0	ncRNA_intronic	5.124	5	9	15	1	1	1
11	rs144668017	12	114545782	TC	T	0.06944	5.063e-05	0.1538	0.03769	0.937912	rs1001563	RP11-100F15.2	0	ncRNA_intronic	2.419	NA	9	15	1	0	1
11	rs58851701	12	114551077	C	A	0.07044	5.799e-05	0.1528	0.03774	0.923391	rs1001563	RP11-100F15.2	0	ncRNA_intronic	1.105	6	9	15	1	1	1
11	rs16943717	12	114553600	C	A	0.06944	5.219e-05	0.1535	0.03769	0.937912	rs1001563	RP11-100F15.2	2305	intergenic	1.767	6	8	15	1	1	1
11	rs76600346	12	114554588	C	T	0.07044	5.27e-05	0.1536	0.03772	0.923391	rs1001563	RP11-100F15.2	3293	intergenic	2.169	7	5	15	1	1	1
11	rs12422801	12	114555103	T	A	0.07044	5.27e-05	0.1536	0.03772	0.923391	rs1001563	RP11-100F15.2	3808	intergenic	2.659	6	5	15	1	1	1
11	rs2384377	12	114559469	A	G	0.06944	5.219e-05	0.1535	0.03769	0.937912	rs1001563	RP11-100F15.2	8174	intergenic	0.658	7	7	15	1	1	1
11	rs73192974	12	114560043	C	T	0.06944	5.219e-05	0.1535	0.03769	0.937912	rs1001563	RP11-100F15.2	8748	intergenic	3.375	4	7	15	1	1	1
11	rs58602244	12	114561854	G	T	0.06845	4.175e-05	0.1553	0.03762	0.952832	rs1001563	RP11-100F15.2	10559	intergenic	0.266	5	7	15	0	0	1
11	rs144068949	12	114562409	TAAG	T	0.06944	0.0001517	0.144	0.03777	0.937912	rs1001563	RP11-100F15.2	11114	intergenic	1.536	NA	7	15	0	0	1
11	rs74332069	12	114565426	C	T	0.06944	0.0001517	0.144	0.03777	0.937912	rs1001563	RP11-100F15.2	14131	intergenic	0.383	6	9	15	0	1	1
11	rs11066957	12	114565591	C	T	0.06944	0.0001729	0.1433	0.03794	0.937912	rs1001563	RP11-100F15.2	14296	intergenic	0.822	6	9	15	0	1	1
11	rs1920587	12	114566926	C	T	0.07143	0.0001237	0.1461	0.03782	0.939667	rs1001563	RP11-100F15.2	15631	intergenic	0.523	NA	9	15	0	1	1
11	rs73192980	12	114567386	C	T	0.07044	0.0001517	0.144	0.03777	0.954209	rs1001563	RP11-100F15.2	16091	intergenic	0.281	5	9	15	0	1	1
11	rs73192981	12	114568239	G	A	0.07044	0.0001517	0.144	0.03777	0.954209	rs1001563	RP11-100F15.2	16944	intergenic	3.247	5	9	15	0	1	1
11	rs4140701	12	114570036	C	A	0.07044	0.0001517	0.144	0.03777	0.954209	rs1001563	RP11-100F15.2	18741	intergenic	2.919	5	9	15	0	1	1
11	rs4140702	12	114570047	C	T	0.06944	4.175e-05	0.1553	0.03762	0.969145	rs1001563	RP11-100F15.2	18752	intergenic	0.846	7	9	15	0	0	1
11	rs2042859	12	114570460	T	A	0.07044	0.0001517	0.144	0.03777	0.954209	rs1001563	RP11-100F15.2	19165	intergenic	0.827	7	9	15	0	1	1
11	rs1001563	12	114574473	G	A	0.06746	5.159e-06	0.1733	0.03768	1	rs1001563	RP11-100F15.2	23178	intergenic	9.383	5	5	15	0	0	1
11	rs61508403	12	114575326	T	C	0.06944	4.175e-05	0.1553	0.03762	0.969145	rs1001563	RP11-100F15.2	24031	intergenic	0.441	7	5	15	0	0	1
11	rs10492335	12	114579563	T	C	0.06944	0.0001517	0.144	0.03777	0.937912	rs1001563	RP11-100F15.2	28268	intergenic	0.05	7	5	15	0	0	1
11	rs73192989	12	114580187	G	T	0.06845	4.175e-05	0.1553	0.03762	0.952832	rs1001563	RP11-100F15.2	28892	intergenic	0.769	4	7	15	0	0	1
11	rs1920583	12	114580521	T	C	0.06944	0.0001581	0.1437	0.0378	0.937912	rs1001563	RP11-100F15.2	29226	intergenic	4.262	NA	7	15	0	0	1
11	rs5801027	12	114582994	AC	A	0.06944	0.0001517	0.144	0.03777	0.937912	rs1001563	RP11-100F15.2	31699	intergenic	0.469	NA	9	15	0	0	1
11	rs741637	12	114583442	C	T	0.06944	0.0001517	0.144	0.03777	0.937912	rs1001563	RP11-100F15.2	32147	intergenic	0.002	5	9	15	0	0	1
11	rs35564848	12	114588010	T	TA	0.06944	0.0001517	0.144	0.03777	0.937912	rs1001563	RP11-100F15.2	36715	intergenic	1.127	NA	9	15	0	0	1
11	rs12424067	12	114591143	G	A	0.07044	0.0001517	0.144	0.03777	0.923391	rs1001563	RP11-100F15.2	39848	intergenic	1.631	5	7	15	0	0	1
11	rs1019727	12	114603814	G	C	0.07044	2.91e-05	0.1588	0.0377	0.923391	rs1001563	RP11-100F15.2	52519	intergenic	0.25	7	5	15	0	0	1
11	rs77694734	12	114607545	G	T	0.06647	2.74e-06	0.1817	0.03837	1	rs77694734	RP11-100F15.2	56250	intergenic	0.006	3a	9	15	0	0	1
12	rs482555	12	117781391	T	C	0.4028	0.0001541	0.1451	0.0381	0.756887	rs61536991	NOS1	0	intronic	0.734	3a	5	15	1	1	1
12	rs527590	12	117781918	C	T	0.4008	0.0002214	0.1418	0.03817	0.75714	rs61536991	NOS1	0	intronic	4.058	6	5	15	1	1	1
12	rs10850814	12	117785048	T	C	0.4187	0.001155	-0.1231	0.03771	0.600698	rs61536991	NOS1	0	intronic	0.184	6	5	15	1	1	1
12	kgp10922873	12	117786105	G	A	0.4196	0.001129	-0.1226	0.03749	0.601759	rs61536991	NOS1	0	intronic	3.748	7	5	15	1	1	1
12	rs4766845	12	117787554	G	T	0.4058	0.0004971	0.1315	0.03756	0.809587	rs61536991	NOS1	0	intronic	2.552	7	5	15	1	1	1
12	kgp9621787	12	117788240	C	T	0.4058	0.0004478	0.132	0.03742	0.809587	rs61536991	NOS1	0	intronic	8.172	4	5	15	1	1	1
12	rs4767532	12	117790932	C	T	0.4097	0.0004131	0.133	0.03746	0.822138	rs61536991	NOS1	0	intronic	0.599	7	5	14	1	1	1
12	rs61536991	12	117791580	G	GT	0.4563	6.79e-06	0.1689	0.03722	1	rs61536991	NOS1	0	intronic	1.266	NA	5	14	1	1	1
13	rs35876028	13	40093984	GA	G	0.1101	8.252e-06	0.1724	0.03833	0.618014	rs1072605	LHFP	0	intronic	0.563	NA	5	15	1	0	1
13	rs9532392	13	40100591	C	T	0.1141	2.42e-05	0.1612	0.03789	0.645983	rs1072605	LHFP	0	intronic	0.011	6	5	15	1	0	1
13	rs7317222	13	40103767	G	T	0.1141	2.243e-05	0.1613	0.03775	0.645983	rs1072605	LHFP	0	intronic	0.618	6	5	15	1	0	1
13	rs75050013	13	40103981	G	A	0.1141	2.1e-05	0.1618	0.03775	0.645983	rs1072605	LHFP	0	intronic	1.042	6	5	15	1	0	1
13	rs150608152	13	40109981	T	TA	0.1131	1.681e-05	0.1635	0.03769	0.65268	rs1072605	LHFP	0	intronic	2.282	NA	5	15	1	0	1
13	rs61954148	13	40112897	C	T	0.1151	2.083e-05	0.1607	0.03747	0.657653	rs1072605	LHFP	0	intronic	1.436	7	5	15	1	0	1
13	rs74046534	13	40115591	C	T	0.1141	2.321e-05	0.1594	0.03738	0.664388	rs1072605	LHFP	0	intronic	3.186	5	5	15	1	0	1
13	rs7334762	13	40116928	C	G	0.1141	2.321e-05	0.1594	0.03738	0.664388	rs1072605	LHFP	0	intronic	0.629	5	5	15	1	0	1
13	rs61432896	13	40117711	T	C	0.1141	1.408e-05	0.1632	0.03727	0.664388	rs1072605	LHFP	0	intronic	0.765	7	5	15	1	0	1
13	rs56213801	13	40117762	T	G	0.1141	1.408e-05	0.1632	0.03727	0.664388	rs1072605	LHFP	0	intronic	0.009	7	5	15	1	0	1
13	rs74046537	13	40117976	T	C	0.1151	1.07e-05	0.1657	0.03732	0.657653	rs1072605	LHFP	0	intronic	4.596	5	4	15	1	0	1
13	rs74046538	13	40118600	C	A	0.1141	1.366e-05	0.1633	0.03724	0.664388	rs1072605	LHFP	0	intronic	1.009	5	4	15	1	0	1
13	rs74046541	13	40120997	G	A	0.1141	1.332e-05	0.1633	0.03721	0.664388	rs1072605	LHFP	0	intronic	4.549	5	5	15	1	0	1
13	rs138507776	13	40122220	TAGG	T	0.1141	2.667e-05	0.1573	0.03718	0.664388	rs1072605	LHFP	0	intronic	0.861	NA	5	15	1	0	1
13	rs74046546	13	40125882	T	C	0.1131	1.185e-05	0.1642	0.03719	0.67123	rs1072605	LHFP	0	intronic	7.397	5	4	15	1	0	1
13	rs978136	13	40126462	T	C	0.1111	3.864e-06	0.174	0.03734	0.666394	rs1072605	LHFP	0	intronic	4.401	NA	2	15	1	0	1
13	rs57628663	13	40132611	T	C	0.1121	1.011e-05	0.1658	0.03724	0.659483	rs1072605	LHFP	0	intronic	1.523	6	5	15	1	0	1
13	rs74046552	13	40134364	G	T	0.1141	1.428e-05	0.1629	0.03723	0.645983	rs1072605	LHFP	0	intronic	3.626	5	5	15	1	0	1
13	rs74046553	13	40135032	A	G	0.1141	1.422e-05	0.163	0.03727	0.645983	rs1072605	LHFP	0	intronic	0.381	7	4	15	1	0	1
13	rs74046554	13	40135273	C	T	0.1121	1.18e-05	0.1644	0.03723	0.659483	rs1072605	LHFP	0	intronic	1.053	6	4	15	1	0	1
13	rs74046555	13	40135547	T	C	0.1121	1.18e-05	0.1644	0.03723	0.659483	rs1072605	LHFP	0	intronic	7.469	6	4	15	1	0	1
13	rs74046556	13	40136216	C	A	0.1121	1.18e-05	0.1644	0.03723	0.659483	rs1072605	LHFP	0	intronic	3.169	5	5	15	1	0	1
13	rs7983392	13	40137419	A	G	0.1121	1.007e-05	0.166	0.03728	0.659483	rs1072605	LHFP	0	intronic	5.267	5	5	15	1	0	1
13	rs7985865	13	40137573	G	A	0.1121	1.007e-05	0.166	0.03728	0.659483	rs1072605	LHFP	0	intronic	10.08	5	5	15	1	0	1
13	rs202121408	13	40137786	CAG	TAG	0.1121	2.904e-05	0.1576	0.03741	0.659483	rs1072605	LHFP	0	intronic	NA	NA	5	15	1	0	1
13	rs61956463	13	40138394	T	C	0.1121	1.007e-05	0.166	0.03728	0.659483	rs1072605	LHFP	0	intronic	9.442	6	5	15	1	0	1
13	rs61956464	13	40139570	T	C	0.1131	1.217e-05	0.1649	0.03738	0.65268	rs1072605	LHFP	0	intronic	15.17	5	1	15	1	0	1
13	rs7985820	13	40141267	A	T	0.1121	9.556e-06	0.1665	0.03729	0.659483	rs1072605	LHFP	0	intronic	4.779	4	5	15	1	0	1
13	rs61956467	13	40145868	G	A	0.1111	3.92e-06	0.1758	0.03775	0.666394	rs1072605	LHFP	0	intronic	0.507	6	2	15	1	0	1
13	rs74044105	13	40146191	C	A	0.1121	4.576e-06	0.1734	0.0375	0.659483	rs1072605	LHFP	0	intronic	6.024	5	2	15	1	0	1
13	rs56103901	13	40147054	G	A	0.1111	8.871e-06	0.1692	0.03776	0.666394	rs1072605	LHFP	0	intronic	12.9	5	5	15	1	0	1
13	rs17060288	13	40149387	T	C	0.09325	0.0004137	0.133	0.03745	0.889356	rs1072605	LHFP	0	intronic	3.104	6	4	15	1	1	1
13	rs7333551	13	40151920	G	C	0.09524	0.0002657	0.1387	0.03782	0.891298	rs1072605	LHFP	0	intronic	3.844	7	4	15	1	1	1
13	rs71423201	13	40158110	G	A	0.09425	7.291e-05	0.1515	0.03793	0.926893	rs1072605	LHFP	0	intronic	0.231	4	1	15	1	1	1
13	rs12853787	13	40158373	A	T	0.09425	5.475e-05	0.1541	0.03794	0.926893	rs1072605	LHFP	0	intronic	4.251	6	1	15	1	0	1
13	rs4551908	13	40158444	T	C	0.09425	0.0003116	0.1382	0.03812	0.926893	rs1072605	LHFP	0	intronic	1.737	5	4	15	1	1	1
13	rs1548273	13	40159629	A	G	0.09425	0.0002412	0.1404	0.03803	0.926893	rs1072605	LHFP	0	intronic	2.295	3a	5	15	1	1	1
13	rs4567589	13	40160541	A	G	0.1488	NA	NA	NA	0.958508	rs1072605	LHFP	0	intronic	2.994	3a	5	15	1	0	1
13	rs2324348	13	40162979	G	A	0.09325	4.557e-05	0.1561	0.03801	0.937044	rs1072605	LHFP	0	intronic	0.499	6	4	15	1	1	1
13	rs9548835	13	40164648	T	A	0.1448	NA	NA	NA	0.991557	rs1072605	LHFP	0	intronic	5.351	5	4	15	1	0	1
13	rs1072605	13	40165059	C	T	0.08829	3.264e-06	0.179	0.0381	1	rs1072605	LHFP	0	intronic	0.478	NA	4	15	1	0	1
13	rs34490304	13	40165286	A	G	0.0873	4.453e-06	0.1766	0.03813	0.986749	rs1072605	LHFP	0	intronic	1.83	6	4	15	1	0	1
13	rs9576870	13	40168051	C	T	0.1478	NA	NA	NA	0.966618	rs1072605	LHFP	0	intronic	3.989	7	5	15	1	0	1
13	rs9548838	13	40168459	C	T	0.1498	NA	NA	NA	0.950497	rs1072605	LHFP	0	intronic	2.763	5	5	15	1	0	1
13	rs9566462	13	40169423	C	T	0.1498	NA	NA	NA	0.950497	rs1072605	LHFP	0	intronic	1.822	7	4	15	1	0	1
13	rs33999589	13	40169843	G	GA	0.1498	NA	NA	NA	0.950497	rs1072605	LHFP	0	intronic	0.114	NA	4	15	1	0	1
13	rs3764073	13	40179199	T	C	0.09028	NA	NA	NA	0.803283	rs1072605	LHFP	1533	intergenic	1.396	7	5	15	1	0	1
13	rs76133373	13	40183893	A	T	0.08433	NA	NA	NA	0.798371	rs1072605	LHFP	6227	intergenic	17.05	6	5	15	1	0	1
14	rs151082476	14	57029172	C	T	0.1002	0.0001942	0.1455	0.0388	0.702686	rs17091769	TMEM260	0	intronic	4.359	6	9	14	1	0	1
14	rs12050187	14	57033445	C	T	0.1161	0.005993	0.1078	0.0391	0.609758	rs17091769	TMEM260	0	intronic	0.102	7	9	14	1	0	1
14	rs77241405	14	57042239	C	T	0.1022	0.0004491	0.1355	0.0384	0.727524	rs17091769	TMEM260	0	intronic	1.133	7	13	15	1	0	1
14	rs139484122	14	57042345	G	A	0.1012	0.0004491	0.1355	0.0384	0.715069	rs17091769	TMEM260	0	intronic	6.668	7	13	15	1	0	1
14	rs78700500	14	57044121	C	T	0.1002	0.0009734	0.1278	0.03857	0.723578	rs17091769	TMEM260	0	intronic	4.979	5	13	15	1	0	1
14	rs79555451	14	57044860	C	T	0.1012	0.0007893	0.1303	0.03862	0.715069	rs17091769	TMEM260	0	intronic	1.425	4	1	15	1	0	1
14	rs76241424	14	57046351	A	G	0.08532	0.0001982	0.1433	0.03828	0.947602	rs17091769	TMEM260	0	UTR5	9.65	4	1	1	1	0	1
14	rs76846944	14	57046866	C	T	0.08532	0.0001743	0.1442	0.03818	1	rs17091769	TMEM260	0	intronic	2.807	2b	1	1	1	0	1
14	rs80331354	14	57046913	C	G	0.08532	0.0002811	0.1395	0.03817	1	rs17091769	TMEM260	0	intronic	3.398	3a	1	1	1	0	1
14	rs77358454	14	57048535	T	G	0.1012	0.005196	0.1065	0.03799	0.80469	rs17091769	TMEM260	0	intronic	2.464	7	1	5	1	0	1
14	rs2184299	14	57049114	A	G	0.08532	0.0004851	0.1335	0.03806	1	rs17091769	TMEM260	0	intronic	4.658	NA	1	5	1	0	1
14	rs4901700	14	57050221	A	G	0.08532	0.0004704	0.1337	0.03803	1	rs17091769	TMEM260	0	intronic	7.422	7	5	5	1	0	1
14	rs17091747	14	57051348	G	A	0.08532	0.0004704	0.1337	0.03803	1	rs17091769	TMEM260	0	intronic	0.21	5	5	5	1	0	1
14	rs17091748	14	57051491	C	G	0.08532	0.0004704	0.1337	0.03803	1	rs17091769	TMEM260	0	intronic	4.963	6	5	5	1	0	1
14	rs17091751	14	57053233	A	G	0.08532	0.0004704	0.1337	0.03803	1	rs17091769	TMEM260	0	intronic	0.317	6	4	5	1	0	1
14	rs78318221	14	57055927	C	T	0.08532	0.0004615	0.1338	0.038	1	rs17091769	TMEM260	0	intronic	0.583	7	4	5	1	0	1
14	rs17091756	14	57056605	A	G	0.1012	0.004978	0.1069	0.03792	0.80469	rs17091769	TMEM260	0	intronic	16.57	6	4	5	1	0	1
14	rs17091757	14	57058346	T	G	0.08532	0.000441	0.1342	0.03798	1	rs17091769	TMEM260	0	intronic	9.657	6	4	5	1	0	1
14	rs17091760	14	57059380	T	G	0.1022	0.004737	0.1072	0.03783	0.79568	rs17091769	TMEM260	0	intronic	7.009	6	4	5	1	0	1
14	rs17091764	14	57062167	G	C	0.1012	0.001819	0.1181	0.03771	0.80469	rs17091769	TMEM260	0	intronic	0.761	6	4	5	1	0	1
14	rs138715134	14	57063287	C	G	0.1012	0.0001972	0.1403	0.03746	0.80469	rs17091769	TMEM260	0	intronic	1.423	7	4	5	1	0	1
14	rs10483673	14	57065610	A	C	0.1012	0.0001972	0.1403	0.03746	0.80469	rs17091769	TMEM260	0	intronic	0.372	6	4	5	1	0	1
14	rs78816527	14	57066060	T	C	0.1012	0.0001972	0.1403	0.03746	0.80469	rs17091769	TMEM260	0	intronic	1.878	7	4	5	1	0	1
14	rs17091769	14	57066908	C	T	0.08532	7.436e-06	0.1695	0.0375	1	rs17091769	TMEM260	0	intronic	0.662	7	4	5	1	0	1
14	rs17091770	14	57066930	C	T	0.08532	7.477e-06	0.1695	0.03753	1	rs17091769	TMEM260	0	intronic	0.342	6	4	5	1	0	1
14	rs17091771	14	57067466	C	G	0.1012	0.0001762	0.1414	0.03746	0.80469	rs17091769	TMEM260	0	intronic	2.507	7	4	5	1	0	1
14	rs78236881	14	57068589	C	T	0.08532	7.436e-06	0.1695	0.0375	1	rs17091769	TMEM260	0	intronic	1.823	6	5	5	1	0	1
14	rs79238317	14	57068613	C	T	0.08532	7.436e-06	0.1695	0.0375	1	rs17091769	TMEM260	0	intronic	2.098	7	5	5	1	0	1
14	rs17091777	14	57068679	C	T	0.08532	7.436e-06	0.1695	0.0375	1	rs17091769	TMEM260	0	intronic	0.792	6	5	5	1	0	1
14	rs111378942	14	57072185	C	CTT	0.1012	0.0004599	0.1323	0.03757	0.80469	rs17091769	TMEM260	0	intronic	4.688	NA	4	5	1	0	1
14	rs190689121	14	57072189	A	G	0.1012	0.0004599	0.1323	0.03757	0.80469	rs17091769	TMEM260	0	intronic	5.354	7	4	5	1	0	1
14	rs10483674	14	57073718	T	A	0.08532	2.313e-05	0.1603	0.0376	1	rs17091769	TMEM260	0	intronic	4.533	5	4	5	1	0	1
14	14:57074336	14	57074336	G	A	0.07738	4.567e-05	0.1564	0.03809	0.895771	rs17091769	TMEM260	0	intronic	0.161	NA	4	5	1	0	1
14	14:57074338	14	57074338	G	A	0.07738	4.567e-05	0.1564	0.03809	0.895771	rs17091769	TMEM260	0	intronic	0.314	NA	4	5	1	0	1
14	14:57074341	14	57074341	T	C	0.07738	4.567e-05	0.1564	0.03809	0.895771	rs17091769	TMEM260	0	intronic	1.26	NA	4	5	1	0	1
14	14:57074343	14	57074343	T	A	0.07738	4.567e-05	0.1564	0.03809	0.895771	rs17091769	TMEM260	0	intronic	2.082	NA	4	5	1	0	1
14	14:57074345	14	57074345	T	C	0.07738	4.567e-05	0.1564	0.03809	0.895771	rs17091769	TMEM260	0	intronic	5.709	NA	4	5	1	0	1
14	14:57074347	14	57074347	C	A	0.07738	4.567e-05	0.1564	0.03809	0.895771	rs17091769	TMEM260	0	intronic	1.377	NA	4	5	1	0	1
14	rs113323366	14	57074430	G	GTA	0.1002	0.0005107	0.131	0.03749	0.810205	rs17091769	TMEM260	0	intronic	0.852	NA	4	5	1	0	1
14	rs76780784	14	57074464	G	T	0.08532	2.791e-05	0.1587	0.0376	1	rs17091769	TMEM260	0	intronic	1.269	7	4	5	1	0	1
14	rs17091796	14	57074806	C	G	0.08532	2.791e-05	0.1587	0.0376	1	rs17091769	TMEM260	0	intronic	10.9	6	4	5	1	0	1
14	rs8018581	14	57076171	A	T	0.1042	0.0004592	0.132	0.03749	0.782408	rs17091769	TMEM260	0	intronic	2.984	7	4	5	1	0	1
14	rs17091799	14	57076262	T	C	0.1012	0.0005107	0.131	0.03749	0.80469	rs17091769	TMEM260	0	intronic	4.894	7	4	5	1	0	1
14	rs77597221	14	57076396	A	C	0.1012	0.0005107	0.131	0.03749	0.80469	rs17091769	TMEM260	0	intronic	0.489	6	4	5	1	0	1
14	rs17091801	14	57076677	T	C	0.1012	0.0005107	0.131	0.03749	0.80469	rs17091769	TMEM260	0	intronic	3.646	5	4	5	1	0	1
14	rs111798540	14	57076985	T	G	0.1042	0.0004592	0.132	0.03749	0.782408	rs17091769	TMEM260	0	intronic	0.797	7	4	5	1	0	1
14	rs199554429	14	57077665	TTTTC	T	0.1012	0.0004474	0.1324	0.0375	0.80469	rs17091769	TMEM260	0	intronic	0.95	NA	4	5	1	0	1
14	rs4901701	14	57077745	C	T	0.1012	0.0005107	0.131	0.03749	0.80469	rs17091769	TMEM260	0	intronic	0.039	6	4	5	1	0	1
14	rs74640655	14	57078165	G	A	0.1002	0.0005107	0.131	0.03749	0.810205	rs17091769	TMEM260	0	intronic	4.759	6	4	5	1	0	1
14	rs112252706	14	57078312	T	C	0.1012	0.0005107	0.131	0.03749	0.80469	rs17091769	TMEM260	0	intronic	0.403	7	4	5	1	0	1
14	rs74244837	14	57079303	T	C	0.1012	0.0005107	0.131	0.03749	0.80469	rs17091769	TMEM260	0	intronic	0.933	6	4	5	1	0	1
14	rs77085246	14	57079495	T	A	0.1012	0.0005107	0.131	0.03749	0.80469	rs17091769	TMEM260	0	intronic	0.937	6	4	5	1	0	1
14	rs17091806	14	57079691	T	C	0.1012	0.0005107	0.131	0.03749	0.80469	rs17091769	TMEM260	0	intronic	2.001	7	4	5	1	0	1
14	rs1055652	14	57080263	C	T	0.1012	0.0005107	0.131	0.03749	0.80469	rs17091769	TMEM260	0	intronic	0.244	6	4	5	1	0	1
14	rs76598125	14	57080509	G	A	0.1012	0.0005107	0.131	0.03749	0.80469	rs17091769	TMEM260	0	intronic	2.182	7	4	5	1	0	1
14	rs17091822	14	57089612	C	G	0.1012	0.0005107	0.131	0.03749	0.80469	rs17091769	TMEM260	0	intronic	1.691	6	4	5	1	0	1
14	rs4898908	14	57090923	A	G	0.1012	0.0003436	0.1351	0.03753	0.80469	rs17091769	TMEM260	0	intronic	4.25	6	4	5	1	0	1
14	rs117363336	14	57091159	T	G	0.1012	0.0002871	0.137	0.03755	0.80469	rs17091769	TMEM260	0	intronic	2.041	7	4	5	1	0	1
14	rs77622310	14	57091720	A	G	0.1012	0.0002871	0.137	0.03755	0.80469	rs17091769	TMEM260	0	intronic	1.568	5	4	5	1	0	1
14	rs2274707	14	57092031	A	T	0.1012	0.0002871	0.137	0.03755	0.80469	rs17091769	TMEM260	0	intronic	1.719	7	4	5	1	0	1
14	rs17091836	14	57093632	T	C	0.08532	3.319e-05	0.1574	0.03764	1	rs17091769	TMEM260	0	intronic	2.803	6	4	5	1	0	1
14	rs76432659	14	57093684	A	G	0.1002	0.0004193	0.1333	0.03758	0.791949	rs17091769	TMEM260	0	intronic	3.746	6	4	5	1	0	1
14	rs71980937	14	57094376	TC	T	0.1032	0.0004116	0.1332	0.03752	0.790988	rs17091769	TMEM260	0	intronic	0.233	NA	4	5	1	0	1
14	rs9635234	14	57094564	A	G	0.1012	0.000448	0.1324	0.03752	0.80469	rs17091769	TMEM260	0	intronic	5.474	7	4	5	1	0	1
14	rs80070578	14	57094922	G	T	0.1002	0.0004689	0.1321	0.03756	0.810205	rs17091769	TMEM260	0	intronic	3.375	6	4	5	1	0	1
14	rs74608756	14	57095129	G	A	0.1002	0.0004835	0.1318	0.03758	0.810205	rs17091769	TMEM260	0	intronic	3.664	6	4	5	1	0	1
14	rs4901703	14	57095527	C	A	0.1002	0.0004885	0.1317	0.03758	0.810205	rs17091769	TMEM260	0	intronic	1.153	7	4	5	1	0	1
14	rs74848235	14	57096657	G	C	0.1012	0.0004885	0.1317	0.03758	0.80469	rs17091769	TMEM260	0	intronic	3.842	7	4	5	1	0	1
14	rs75801596	14	57097623	G	A	0.1012	0.0005361	0.1309	0.03762	0.80469	rs17091769	TMEM260	0	intronic	0.43	4	4	8	1	0	1
14	rs117564289	14	57097742	A	G	0.1012	0.0005361	0.1309	0.03762	0.80469	rs17091769	TMEM260	0	intronic	2.046	4	4	8	1	0	1
14	rs143555183	14	57098209	T	C	0.1012	0.0005361	0.1309	0.03762	0.80469	rs17091769	TMEM260	0	intronic	7.938	6	4	4	1	0	1
14	rs78004730	14	57098903	T	G	0.1012	0.0005361	0.1309	0.03762	0.80469	rs17091769	TMEM260	0	intronic	7.267	7	4	4	1	0	1
14	14:57099976	14	57099976	ATTTT	ATTTTTT	0.1022	0.0006746	0.1285	0.03762	0.79568	rs17091769	TMEM260:RP11-1085N6.2	0:0	ncRNA_exonic	NA	NA	4	4	1	0	1
14	rs17091850	14	57100332	G	A	0.1002	0.0005361	0.1309	0.03762	0.813866	rs17091769	TMEM260:RP11-1085N6.2	0:0	ncRNA_intronic	2.479	5	4	4	1	0	1
14	rs17091851	14	57100449	A	T	0.1002	0.0005361	0.1309	0.03762	0.813866	rs17091769	TMEM260:RP11-1085N6.2	0:0	ncRNA_intronic	4.289	5	4	4	1	0	1
14	rs148263779	14	57100512	T	TCA	0.1002	0.0005361	0.1309	0.03762	0.813866	rs17091769	TMEM260:RP11-1085N6.2	0:0	ncRNA_intronic	1.099	NA	4	4	1	0	1
14	rs7159178	14	57101052	G	T	0.1002	0.0005537	0.1307	0.03766	0.813866	rs17091769	TMEM260:RP11-1085N6.2	0:0	ncRNA_intronic	1.929	6	4	4	1	0	1
14	rs17091854	14	57101126	A	C	0.1002	0.0005361	0.1309	0.03762	0.813866	rs17091769	TMEM260:RP11-1085N6.2	0:0	ncRNA_intronic	5.075	7	4	4	1	0	1
14	rs72711227	14	57102456	C	T	0.1002	0.0005361	0.1309	0.03762	0.813866	rs17091769	TMEM260:RP11-1085N6.2	0:0	ncRNA_intronic	1.853	6	4	4	1	0	1
14	14:57102562	14	57102562	AAT	A	0.1081	0.001015	0.1253	0.03794	0.74486	rs17091769	TMEM260:RP11-1085N6.2	0:0	ncRNA_intronic	8.013	NA	4	4	1	0	1
14	rs17091864	14	57103379	A	G	0.1002	0.000456	0.1326	0.03764	0.813866	rs17091769	TMEM260:RP11-1085N6.2	0:0	ncRNA_intronic	0.714	5	4	4	1	0	1
14	rs72711229	14	57103381	A	G	0.1002	0.000456	0.1326	0.03764	0.813866	rs17091769	TMEM260:RP11-1085N6.2	0:0	ncRNA_intronic	4.327	5	4	4	1	0	1
14	rs72711230	14	57103725	C	T	0.1002	0.000456	0.1326	0.03764	0.813866	rs17091769	TMEM260:RP11-1085N6.2	0:0	ncRNA_intronic	0.679	7	4	4	1	0	1
14	rs72711232	14	57104127	G	A	0.1002	0.0004618	0.1326	0.03767	0.813866	rs17091769	TMEM260:RP11-1085N6.2	0:0	ncRNA_intronic	0.918	5	4	4	1	0	1
14	rs147154694	14	57104571	T	TCCCTGCTATCAAAATCTTAC	0.1002	0.000456	0.1326	0.03764	0.813866	rs17091769	TMEM260:RP11-1085N6.2	0:0	ncRNA_intronic	1.857	NA	4	4	1	0	1
14	rs17091867	14	57104909	A	G	0.1002	0.000456	0.1326	0.03764	0.813866	rs17091769	TMEM260:RP11-1085N6.2	0:0	ncRNA_intronic	5.175	7	4	4	1	0	1
14	rs72711233	14	57105194	C	T	0.1012	0.0005053	0.1317	0.03768	0.80469	rs17091769	TMEM260:RP11-1085N6.2	0:0	ncRNA_intronic	0.428	6	4	4	1	0	1
14	rs72711234	14	57105524	G	A	0.1012	0.0005839	0.13	0.03761	0.80469	rs17091769	TMEM260:RP11-1085N6.2	0:0	ncRNA_intronic	0.05	5	4	4	1	0	1
14	rs17091874	14	57105643	A	G	0.1002	0.000456	0.1326	0.03764	0.813866	rs17091769	TMEM260:RP11-1085N6.2	0:0	ncRNA_intronic	1.637	7	4	4	1	0	1
14	rs55769469	14	57106292	C	T	0.1012	0.000475	0.1323	0.03767	0.80469	rs17091769	TMEM260:RP11-1085N6.2	0:0	ncRNA_intronic	0.549	7	4	4	1	0	1
14	rs56352631	14	57106502	C	T	0.1002	0.000456	0.1326	0.03764	0.813866	rs17091769	TMEM260:RP11-1085N6.2	0:0	ncRNA_intronic	1.625	6	4	4	1	0	1
14	rs55912755	14	57106719	A	G	0.1002	0.000456	0.1326	0.03764	0.813866	rs17091769	TMEM260:RP11-1085N6.2	0:0	ncRNA_intronic	2.654	6	4	4	1	0	1
14	rs201548663	14	57107028	CA	C	0.1002	0.000456	0.1326	0.03764	0.813866	rs17091769	TMEM260:RP11-1085N6.2	0:0	ncRNA_intronic	0.616	NA	4	5	1	0	1
14	rs116956185	14	57107040	T	A	0.1002	0.000456	0.1326	0.03764	0.813866	rs17091769	TMEM260:RP11-1085N6.2	0:0	ncRNA_intronic	1.243	7	4	5	1	0	1
14	rs146410496	14	57107375	G	A	0.1002	0.000456	0.1326	0.03764	0.813866	rs17091769	TMEM260:RP11-1085N6.2	0:0	ncRNA_intronic	0.647	7	4	5	1	0	1
14	rs146737680	14	57107693	A	C	0.08532	4.619e-05	0.1547	0.0377	1	rs17091769	TMEM260:RP11-1085N6.2	0:0	ncRNA_intronic	4.337	6	4	5	1	0	1
14	rs143303053	14	57107750	T	C	0.09921	0.0005326	0.1314	0.03773	0.823211	rs17091769	TMEM260:RP11-1085N6.2	0:0	ncRNA_intronic	0.205	7	4	5	1	0	1
14	14:57107776	14	57107776	C	T	0.0754	0.003691	0.1146	0.0393	0.637755	rs17091769	TMEM260:RP11-1085N6.2	0:0	ncRNA_intronic	0.078	NA	4	5	1	0	1
14	14:57107777	14	57107777	A	G	0.08333	0.001762	0.1219	0.0388	0.626418	rs17091769	TMEM260:RP11-1085N6.2	0:0	ncRNA_intronic	0.122	NA	4	5	1	0	1
14	14:57107778	14	57107778	G	C	0.08333	0.001762	0.1219	0.0388	0.626418	rs17091769	TMEM260:RP11-1085N6.2	0:0	ncRNA_intronic	0.645	NA	4	5	1	0	1
14	rs138910399	14	57108368	A	G	0.1022	0.000456	0.1326	0.03764	0.79568	rs17091769	TMEM260:RP11-1085N6.2	0:0	ncRNA_intronic	2.158	7	5	5	1	0	1
14	rs139807238	14	57108871	C	T	0.1022	0.0004613	0.1326	0.03765	0.79568	rs17091769	TMEM260:RP11-1085N6.2	0:0	ncRNA_intronic	0.544	7	5	5	1	0	1
14	rs138269552	14	57110793	T	G	0.1012	0.0008533	0.126	0.03761	0.80469	rs17091769	TMEM260:RP11-1085N6.2	0:0	ncRNA_intronic	0.491	7	5	5	1	0	1
14	rs4359344	14	57111087	T	G	0.1002	0.0008533	0.126	0.03761	0.813866	rs17091769	TMEM260:RP11-1085N6.2	0:0	ncRNA_intronic	0.403	7	5	5	1	0	1
14	rs139826599	14	57111323	G	A	0.1002	0.0008533	0.126	0.03761	0.813866	rs17091769	TMEM260:RP11-1085N6.2	0:0	ncRNA_intronic	0.469	7	5	5	1	0	1
14	rs4359345	14	57111386	T	A	0.1002	0.0008533	0.126	0.03761	0.813866	rs17091769	TMEM260:RP11-1085N6.2	0:0	ncRNA_intronic	0.519	6	5	5	1	0	1
14	rs148485005	14	57112285	A	G	0.1012	0.0008533	0.126	0.03761	0.80469	rs17091769	TMEM260:RP11-1085N6.2	0:0	ncRNA_intronic	6.86	7	5	5	1	0	1
14	rs371359988	14	57113570	GTT	G	0.1032	0.001111	0.1237	0.03775	0.786832	rs17091769	TMEM260:RP11-1085N6.2	0:0	ncRNA_intronic	5.324	NA	4	5	1	0	1
14	rs140374797	14	57114986	T	TG	0.1002	0.0008533	0.126	0.03761	0.813866	rs17091769	TMEM260:RP11-1085N6.2	0:0	ncRNA_intronic	5.116	NA	4	5	1	0	1
15	rs7149467	14	98644581	A	G	0.4345	6.708e-08	0.2095	0.03831	0.963971	rs34486793	RP11-61O1.1	0	ncRNA_intronic	1.063	5	2	15	1	1	1
15	rs34486793	14	98645310	G	GT	0.4444	1.415e-08	0.2184	0.03797	1	rs34486793	RP11-61O1.1	0	ncRNA_intronic	18.75	NA	5	15	1	1	1
15	rs1963509	14	98646886	G	C	0.3353	0.003112	-0.1151	0.03877	0.673017	rs2008259	RP11-61O1.1	0	ncRNA_intronic	0.844	6	5	15	1	1	1
15	rs2008259	14	98646939	C	T	0.4325	6.781e-08	-0.2072	0.03791	1	rs2008259	RP11-61O1.1	0	ncRNA_intronic	0.483	6	5	15	1	1	1
15	rs1963510	14	98647033	G	A	0.4325	6.781e-08	-0.2072	0.03791	1	rs2008259	RP11-61O1.1	0	ncRNA_intronic	1.796	6	5	15	1	1	1
15	rs1381273	14	98649060	T	C	0.3482	0.001957	-0.1201	0.03862	0.623336	rs2008259	RP11-61O1.1	0	ncRNA_intronic	11.68	3a	2	15	1	1	1
15	rs7160389	14	98650988	C	T	0.3462	0.001304	-0.1243	0.03846	0.623755	rs2008259	RP11-61O1.1	0	ncRNA_intronic	13.23	5	2	15	1	1	1
15	rs12434976	14	98652207	C	A	0.3333	0.001617	-0.1223	0.03862	0.661706	rs2008259	RP11-61O1.1	0	ncRNA_intronic	2.199	5	2	15	1	1	1
15	rs1381274	14	98655131	T	C	0.3333	0.007058	-0.105	0.03883	0.669281	rs2008259	RP11-61O1.1	0	ncRNA_intronic	2.701	5	2	15	1	1	1
16	rs9949754	18	21800298	A	G	0.2946	8.313e-07	0.1859	0.03733	1	rs9949754	OSBPL1A	0	intronic	5.026	7	4	5	1	0	1
16	rs9962319	18	21800299	G	A	0.2946	1.778e-06	0.1793	0.03717	1	rs9949754	OSBPL1A	0	intronic	8.593	7	4	5	1	0	1
17	rs6034566	20	16645332	G	T	0.3452	NA	NA	NA	0.658793	rs6111234	Y_RNA	5953	intergenic	2.702	5	5	15	1	0	1
17	rs6111233	20	16646165	T	C	0.2292	0.001671	0.1233	0.03905	0.619291	rs6111234	Y_RNA	5120	intergenic	1.084	7	7	15	1	0	1
17	rs6111234	20	16646941	G	A	0.3125	4.489e-06	0.1791	0.03867	1	rs6111234	Y_RNA	4344	intergenic	7.019	5	9	15	1	1	1
17	rs6044205	20	16647345	T	C	0.2272	0.0005953	0.134	0.03882	0.645674	rs6111234	Y_RNA	3940	intergenic	1.268	5	9	15	1	0	1
17	rs2104198	20	16653076	C	T	0.3968	0.0001352	0.1458	0.03796	0.690479	rs6111234	Y_RNA	1688	intergenic	2.26	5	9	15	1	1	1
17	rs4597603	20	16653171	T	C	0.3968	0.0001352	0.1458	0.03796	0.690479	rs6111234	Y_RNA	1783	intergenic	1.379	5	9	15	1	1	1
17	20:16653357	20	16653357	T	TCCCA	0.3988	9.607e-05	0.1496	0.03809	0.686368	rs6111234	Y_RNA	1969	intergenic	NA	NA	9	15	1	0	1
17	rs6044212	20	16653508	G	A	0.3978	0.0001062	0.1496	0.03834	0.68917	rs6111234	Y_RNA	2120	intergenic	0.57	6	9	15	1	1	1
17	rs11697128	20	16653591	C	T	0.3988	0.0001192	0.1483	0.03827	0.686368	rs6111234	Y_RNA	2203	intergenic	3.941	7	9	15	1	1	1
17	rs4619686	20	16653807	C	T	0.3968	0.0001342	0.1458	0.03793	0.690479	rs6111234	Y_RNA	2419	intergenic	1.367	6	9	15	1	1	1
17	rs4481061	20	16653862	G	A	0.3958	0.0002885	0.1387	0.03804	0.684618	rs6111234	Y_RNA	2474	intergenic	0.319	6	9	15	1	1	1
17	rs4599186	20	16653964	A	G	0.3978	9.114e-05	0.1492	0.03787	0.687661	rs6111234	Y_RNA	2576	intergenic	0.338	6	9	15	1	1	1
17	rs957641	20	16654110	C	T	0.3948	0.0002784	0.1385	0.03788	0.687457	rs6111234	Y_RNA	2722	intergenic	4.759	NA	9	15	1	1	1
17	rs1885572	20	16660162	A	G	0.2312	0.0009302	0.1278	0.0384	0.623912	rs6111234	RPL7AL3	4590	intergenic	0.763	7	7	15	1	0	1
18	rs62205790	20	56324085	T	C	0.05952	3.93e-05	0.1556	0.03758	0.96252	rs62205791	PMEPA1	37492	intergenic	21.6	2b	1	2	0	1	1
18	rs2865399	20	56325087	G	C	0.05952	NA	NA	NA	1	rs62205791	PMEPA1	38494	intergenic	1.329	3a	5	14	0	1	1
18	rs62205791	20	56325452	A	G	0.05952	6.52e-07	0.1863	0.03706	1	rs62205791	PMEPA1	38859	intergenic	3.456	5	5	15	0	1	1
19	rs146517760	21	41935135	A	AT	0.08036	0.01081	0.0972	0.03802	0.774059	rs112307230	DSCAM	0	intronic	0.615	NA	5	15	1	0	1
19	rs199925147	21	41935444	AAATAT	A	0.07937	0.009996	0.09789	0.03789	0.785117	rs112307230	DSCAM	0	intronic	0.875	NA	5	15	1	0	1
19	rs200431485	21	41935484	TTA	T	0.08036	0.008554	0.1	0.03791	0.774059	rs112307230	DSCAM	0	intronic	0.294	NA	5	15	1	0	1
19	21:41935577	21	41935577	A	G	0.08135	0.01895	0.08935	0.03798	0.764981	rs112307230	DSCAM	0	intronic	1.09	NA	5	15	1	0	1
19	21:41935579	21	41935579	G	T	0.08135	0.01895	0.08935	0.03798	0.764981	rs112307230	DSCAM	0	intronic	0.335	NA	5	15	1	0	1
19	21:41935581	21	41935581	T	A	0.08135	0.01895	0.08935	0.03798	0.764981	rs112307230	DSCAM	0	intronic	0.496	NA	5	15	1	0	1
19	21:41935611	21	41935611	TTATA	T	0.07937	0.009996	0.09789	0.03789	0.785117	rs112307230	DSCAM	0	intronic	0.796	NA	5	15	1	0	1
19	rs199991401	21	41935647	A	ATATGTT	0.07937	0.009996	0.09789	0.03789	0.785117	rs112307230	DSCAM	0	intronic	2.838	NA	5	15	1	0	1
19	rs148835692	21	41935755	TTA	T	0.07937	0.009996	0.09789	0.03789	0.785117	rs112307230	DSCAM	0	intronic	0.912	NA	5	15	1	0	1
19	rs17000004	21	41936222	T	C	0.08036	0.01441	0.09341	0.03807	0.774059	rs112307230	DSCAM	0	intronic	2.127	5	5	15	1	0	1
19	rs73366913	21	41936471	T	C	0.08036	0.01081	0.0972	0.03802	0.774059	rs112307230	DSCAM	0	intronic	2.802	5	5	15	1	0	1
19	rs73366915	21	41936977	T	C	0.08036	0.01081	0.0972	0.03802	0.774059	rs112307230	DSCAM	0	intronic	1.957	6	5	15	1	0	1
19	rs7278084	21	41938892	A	G	0.07937	0.006187	0.1039	0.03784	0.785117	rs112307230	DSCAM	0	intronic	4.806	7	3	15	1	0	1
19	rs73366921	21	41940237	T	C	0.07937	0.006187	0.1039	0.03784	0.785117	rs112307230	DSCAM	0	intronic	3.767	6	3	15	1	0	1
19	rs73366924	21	41941030	T	C	0.07937	0.005823	0.1048	0.03788	0.785117	rs112307230	DSCAM	0	intronic	0.032	5	5	15	1	0	1
19	rs7276773	21	41941338	G	A	0.07937	0.006187	0.1039	0.03784	0.785117	rs112307230	DSCAM	0	intronic	0.045	5	3	15	1	0	1
19	rs7278034	21	41941610	T	C	0.07937	0.006187	0.1039	0.03784	0.785117	rs112307230	DSCAM	0	intronic	0.694	4	3	15	1	0	1
19	rs2410254	21	41942532	A	G	0.07937	0.006187	0.1039	0.03784	0.785117	rs112307230	DSCAM	0	intronic	7.119	7	3	15	1	0	1
19	rs73366935	21	41943214	T	C	0.07937	0.006187	0.1039	0.03784	0.785117	rs112307230	DSCAM	0	intronic	1.695	7	5	15	1	0	1
19	rs73366938	21	41944608	A	T	0.07937	0.006187	0.1039	0.03784	0.785117	rs112307230	DSCAM	0	intronic	0.86	7	5	15	1	0	1
19	rs112295319	21	41945035	C	A	0.07937	0.006187	0.1039	0.03784	0.785117	rs112307230	DSCAM	0	intronic	0.004	6	1	15	1	0	1
19	rs57781386	21	41946993	G	A	0.07937	0.006187	0.1039	0.03784	0.785117	rs112307230	DSCAM	0	intronic	6.781	6	1	15	1	0	1
19	rs8132632	21	41947637	T	C	0.07937	0.006187	0.1039	0.03784	0.785117	rs112307230	DSCAM	0	intronic	2.195	6	1	15	1	0	1
19	rs201921213	21	41947701	T	TA	0.08036	0.006759	0.1033	0.038	0.750861	rs112307230	DSCAM	0	intronic	0.579	NA	1	15	1	0	1
19	rs8128612	21	41948378	T	C	0.07937	0.006187	0.1039	0.03784	0.785117	rs112307230	DSCAM	0	intronic	1.859	5	1	15	1	0	1
19	rs8127599	21	41948547	A	G	0.07937	0.006744	0.1024	0.03766	0.785117	rs112307230	DSCAM	0	intronic	1.484	5	1	15	1	0	1
19	rs17000029	21	41949201	G	A	0.07937	0.006187	0.1039	0.03784	0.785117	rs112307230	DSCAM	0	intronic	1.165	7	1	15	1	0	1
19	rs61282077	21	41949334	C	T	0.07937	0.006187	0.1039	0.03784	0.785117	rs112307230	DSCAM	0	intronic	2.451	5	1	15	1	0	1
19	rs17000036	21	41950111	C	T	0.07937	0.006187	0.1039	0.03784	0.785117	rs112307230	DSCAM	0	intronic	1.09	7	5	15	1	0	1
19	rs113307371	21	41950431	G	T	0.07937	0.006187	0.1039	0.03784	0.785117	rs112307230	DSCAM	0	intronic	3.283	6	5	15	1	0	1
19	rs144706615	21	41950456	C	T	0.07937	0.006187	0.1039	0.03784	0.785117	rs112307230	DSCAM	0	intronic	8.123	6	5	15	1	0	1
19	rs8129702	21	41951066	A	T	0.07937	0.006187	0.1039	0.03784	0.785117	rs112307230	DSCAM	0	intronic	1.052	3a	5	15	1	0	1
19	rs8126952	21	41952023	T	C	0.08036	0.007375	0.1018	0.03786	0.774059	rs112307230	DSCAM	0	intronic	2.002	6	5	15	1	0	1
19	rs73366965	21	41952185	C	T	0.07937	0.006187	0.1039	0.03784	0.785117	rs112307230	DSCAM	0	intronic	1.745	7	5	15	1	0	1
19	rs73366972	21	41956805	G	A	0.09524	0.0003315	0.1385	0.03837	0.966042	rs112307230	DSCAM	0	intronic	4.901	5	5	15	1	0	1
19	rs73366977	21	41958398	C	T	0.09524	0.0002823	0.1402	0.03838	0.966042	rs112307230	DSCAM	0	intronic	0.045	6	5	15	1	0	1
19	rs78773171	21	41959092	A	G	0.1022	0.0003658	0.1382	0.03855	0.893835	rs112307230	DSCAM	0	intronic	2.557	7	5	15	1	0	1
19	rs73366979	21	41960186	T	C	0.09524	0.0002823	0.1402	0.03838	0.966042	rs112307230	DSCAM	0	intronic	1.206	7	5	15	1	0	1
19	rs59315455	21	41962426	G	A	0.09524	0.0002062	0.1433	0.03838	0.966042	rs112307230	DSCAM	0	intronic	3.074	5	1	15	1	0	1
19	rs58070021	21	41962539	T	C	0.09524	0.000152	0.1465	0.03842	0.966042	rs112307230	DSCAM	0	intronic	6.377	6	1	15	1	0	1
19	rs61571305	21	41963215	A	C	0.09524	1.716e-05	0.1672	0.03858	0.966042	rs112307230	DSCAM	0	intronic	10.47	7	5	15	1	0	1
19	rs73366990	21	41963486	A	C	0.09524	1.716e-05	0.1672	0.03858	0.966042	rs112307230	DSCAM	0	intronic	4.004	7	5	15	1	0	1
19	rs73366991	21	41963503	A	C	0.09524	1.716e-05	0.1672	0.03858	0.966042	rs112307230	DSCAM	0	intronic	5.573	6	5	15	1	0	1
19	rs73366993	21	41963698	A	G	0.09524	1.716e-05	0.1672	0.03858	0.966042	rs112307230	DSCAM	0	intronic	8.414	7	5	15	1	0	1
19	rs11909446	21	41964078	T	C	0.09524	1.716e-05	0.1672	0.03858	0.966042	rs112307230	DSCAM	0	intronic	3.647	6	5	15	1	0	1
19	rs141172542	21	41964166	AG	A	0.09524	2.422e-05	0.1646	0.03867	0.966042	rs112307230	DSCAM	0	intronic	0.442	NA	5	15	1	0	1
19	rs73368905	21	41967443	G	C	0.09425	2.692e-05	0.1644	0.03885	0.977145	rs112307230	DSCAM	0	intronic	1.598	6	5	15	1	0	1
19	rs59941772	21	41968532	G	C	0.09425	1.682e-05	0.1683	0.03878	0.977145	rs112307230	DSCAM	0	intronic	0.114	6	5	15	1	0	1
19	rs137924488	21	41968928	G	GA	0.09425	1.682e-05	0.1683	0.03878	0.977145	rs112307230	DSCAM	0	intronic	3.764	NA	5	15	1	0	1
19	rs75454244	21	41969132	A	G	0.09425	1.682e-05	0.1683	0.03878	0.977145	rs112307230	DSCAM	0	intronic	3.372	6	5	15	1	0	1
19	rs79958445	21	41969143	A	G	0.09425	1.682e-05	0.1683	0.03878	0.977145	rs112307230	DSCAM	0	intronic	4.62	7	5	15	1	0	1
19	rs144299503	21	41969280	C	CAAAT	0.09425	1.682e-05	0.1683	0.03878	0.977145	rs112307230	DSCAM	0	intronic	3.069	NA	5	15	1	0	1
19	21:41969281	21	41969281	G	A	0.09425	1.682e-05	0.1683	0.03878	0.977145	rs112307230	DSCAM	0	intronic	5.137	NA	5	15	1	0	1
19	rs73368908	21	41969756	A	C	0.09325	1.263e-05	0.1708	0.03877	0.965165	rs112307230	DSCAM	0	intronic	1.432	7	5	15	1	0	1
19	rs112173919	21	41970525	G	C	0.09425	1.682e-05	0.1683	0.03878	0.977145	rs112307230	DSCAM	0	intronic	1.685	6	5	15	1	0	1
19	rs11910520	21	41974486	G	A	0.09425	5.268e-06	0.1784	0.0388	0.977145	rs112307230	DSCAM	0	intronic	0.681	6	5	15	1	0	1
19	rs73368925	21	41977307	T	A	0.09425	5.795e-06	0.1779	0.03887	0.977145	rs112307230	DSCAM	0	intronic	0.349	6	5	15	1	0	1
19	rs73368926	21	41977354	G	C	0.09425	5.795e-06	0.1779	0.03887	0.977145	rs112307230	DSCAM	0	intronic	0.353	7	5	15	1	0	1
19	rs142730535	21	41981211	C	CGTT	0.09325	4.138e-06	0.1818	0.03909	0.988463	rs112307230	DSCAM	0	intronic	0.099	NA	5	15	1	0	1
19	rs73368940	21	41982407	G	A	0.09325	3.967e-06	0.1823	0.03913	0.988463	rs112307230	DSCAM	0	intronic	1.111	7	5	15	1	0	1
19	rs112601020	21	41983112	G	A	0.09226	3.967e-06	0.1823	0.03913	1	rs112307230	DSCAM	0	intronic	1.766	7	5	15	1	0	1
19	rs112307230	21	41983168	T	A	0.09226	3.967e-06	0.1823	0.03913	1	rs112307230	DSCAM	0	intronic	2.4	7	5	15	1	0	1
19	rs73368943	21	41983321	C	T	0.09226	3.967e-06	0.1823	0.03913	1	rs112307230	DSCAM	0	intronic	1.589	6	5	15	1	0	1
19	rs73368947	21	41984062	G	A	0.09226	3.967e-06	0.1823	0.03913	1	rs112307230	DSCAM	0	intronic	3.736	7	5	15	1	0	1
19	rs60487796	21	41987720	G	A	0.09226	4.618e-06	0.1811	0.03914	1	rs112307230	DSCAM:DSCAM-IT1	0:0	ncRNA_intronic	2.281	4	5	15	1	0	1
19	rs73368956	21	41987879	C	T	0.09226	4.618e-06	0.1811	0.03914	1	rs112307230	DSCAM:DSCAM-IT1	0:0	ncRNA_intronic	0.601	5	5	15	1	0	1

## Sheet: Table S3
Supplementary Table S3. Genes implicated by positional, eQTL, or chromatin interaction mapping of SNPs associated with schistosomiasis serum levels of hyaluronic acid in a GWAS analysis of 637 independent individuals.
Note: SNPs were identified by a suggested significant (P<1e-5) association in GWAS analysis, grouped into LD-independent genomic loci, and mapped to genes using positional mapping, eQTL mapping, and chromatin interaction strategies. pLI = probability of loss of function mutation intolerance (higher scores indicate higher probability); posMap = SNPs mapped to this gene by positional mapping; CADD …
ensg	symbol	posMap	eqtlMap	ciMap	chr	start	end	strand	type	entrezID	HUGO	pLI	ncRVIS	posMapSNPs	posMapMaxCADD	eqtlMapSNPs	eqtlMapminP	eqtlMapminQ	eqtlMapts	eqtlDirection	ciMap	ciMapts	minGwasP	IndSigSNPs	GenomicLocus
ENSG00000258927	RP11-1070N10.5	No	No	Yes	14	96087251	96109622	1	lincRNA	NA	NA	NA	NA	0	0	0	NA	NA	NA	NA	Yes	Mesenchymal_Stem_Cell	1.415e-08	rs34486793	15
ENSG00000270038	RP11-1070N10.7	No	No	Yes	14	96110845	96111569	1	lincRNA	NA	NA	NA	NA	0	0	0	NA	NA	NA	NA	Yes	Mesenchymal_Stem_Cell	1.415e-08	rs34486793	15
ENSG00000187621	TCL6	No	No	Yes	14	96116835	96146170	1	processed_transcript	27004	TCL6	NA	NA	0	0	0	NA	NA	NA	NA	Yes	Mesenchymal_Stem_Cell	1.415e-08	rs34486793	15
ENSG00000259084	RP11-1070N10.6	No	No	Yes	14	96129593	96158967	1	sense_overlapping	NA	NA	NA	NA	0	0	0	NA	NA	NA	NA	Yes	Mesenchymal_Stem_Cell	1.415e-08	rs34486793	15
ENSG00000213231	TCL1B	No	No	Yes	14	96152754	96158980	1	protein_coding	9623	TCL1B	0.00468673	0.408778	0	0	0	NA	NA	NA	NA	Yes	Mesenchymal_Stem_Cell	1.415e-08	rs34486793	15
ENSG00000100721	TCL1A	No	No	Yes	14	96176304	96180533	-1	protein_coding	8115	TCL1A	0.0012233	-0.519151	0	0	0	NA	NA	NA	NA	Yes	Mesenchymal_Stem_Cell	1.415e-08	rs34486793	15
ENSG00000257275	RP11-164H13.1	No	No	Yes	14	96178084	96223993	1	antisense	NA	NA	NA	NA	0	0	0	NA	NA	NA	NA	Yes	Mesenchymal_Stem_Cell	1.415e-08	rs34486793	15
ENSG00000263357	AL133167.1	No	No	Yes	14	96317818	96317927	-1	miRNA	NA	NA	NA	NA	0	0	0	NA	NA	NA	NA	Yes	Mesenchymal_Stem_Cell	1.415e-08	rs34486793	15
ENSG00000240051	RPL23AP10	No	No	Yes	14	96922913	96923378	-1	pseudogene	326293	RPL23AP10	NA	NA	0	0	0	NA	NA	NA	NA	Yes	Mesenchymal_Stem_Cell	1.415e-08	rs34486793	15
ENSG00000258702	RP11-433J8.1	No	No	Yes	14	97059070	97062099	1	lincRNA	NA	NA	NA	NA	0	0	0	NA	NA	NA	NA	Yes	IMR90:Mesenchymal_Stem_Cell:Trophoblast-like_Cell	1.415e-08	rs34486793	15
ENSG00000223299	RN7SKP108	No	No	Yes	14	97104524	97104851	-1	misc_RNA	106480866	RN7SKP108	NA	NA	0	0	0	NA	NA	NA	NA	Yes	Mesenchymal_Stem_Cell	1.415e-08	rs34486793	15
ENSG00000258979	RP11-433J8.2	No	No	Yes	14	97207528	97256950	1	lincRNA	105370646	LINC02299	NA	NA	0	0	0	NA	NA	NA	NA	Yes	IMR90	1.415e-08	rs34486793	15
ENSG00000100749	VRK1	No	No	Yes	14	97263641	97398059	1	protein_coding	7443	VRK1	0.0428984	-0.524568	0	0	0	NA	NA	NA	NA	Yes	IMR90	1.415e-08	rs34486793	15
ENSG00000258825	AL133168.3	No	No	Yes	14	97397704	97409917	1	processed_transcript	NA	NA	NA	NA	0	0	0	NA	NA	NA	NA	Yes	Mesenchymal_Stem_Cell:Trophoblast-like_Cell:hESC	1.415e-08	rs34486793	15
ENSG00000225163	LINC00618	No	No	Yes	14	97409916	97411731	1	lincRNA	145249	LINC00618	NA	NA	0	0	0	NA	NA	NA	NA	Yes	Liver:IMR90:Mesenchymal_Stem_Cell:Trophoblast-like_Cell:hESC	1.415e-08	rs34486793	15
ENSG00000259026	RP11-907D1.1	No	No	Yes	14	97576753	97585584	-1	lincRNA	NA	NA	NA	NA	0	0	0	NA	NA	NA	NA	Yes	IMR90:Trophoblast-like_Cell	1.415e-08	rs34486793	15
ENSG00000258393	RP11-907D1.2	No	No	Yes	14	97582692	97587838	1	lincRNA	NA	NA	NA	NA	0	0	0	NA	NA	NA	NA	Yes	IMR90:Trophoblast-like_Cell	1.415e-08	rs34486793	15
ENSG00000259110	RP11-359N5.1	No	No	Yes	14	97621194	97625073	1	lincRNA	105370648	LINC02304	NA	NA	0	0	0	NA	NA	NA	NA	Yes	Mesenchymal_Stem_Cell	1.415e-08	rs34486793	15
ENSG00000246084	CTD-2506J14.1	No	No	Yes	14	97925153	98047938	1	lincRNA	101929241	LINC02325	NA	NA	0	0	0	NA	NA	NA	NA	Yes	IMR90:Mesenchymal_Stem_Cell:Mesendoderm:hESC	1.415e-08	rs34486793	15
ENSG00000240730	RN7SL710P	No	No	Yes	14	97996228	97996510	-1	misc_RNA	NA	RN7SL710P	NA	NA	0	0	0	NA	NA	NA	NA	Yes	Left_Ventricle:Pancreas:IMR90:Mesenchymal_Stem_Cell:Mesendoderm:Trophoblast-like_Cell:hESC	1.415e-08	rs34486793	15
ENSG00000197176	RP11-76E12.1	No	No	Yes	14	98098984	98152995	-1	lincRNA	100129345	LINC02291	NA	NA	0	0	0	NA	NA	NA	NA	Yes	Aorta	1.415e-08	rs34486793	15
ENSG00000258869	RP11-204N11.1	No	No	Yes	14	98215601	98230326	-1	protein_coding	100132612	LINC02312	NA	NA	0	0	0	NA	NA	NA	NA	Yes	IMR90:Mesendoderm:hESC	1.415e-08	rs34486793	15
ENSG00000258379	RP11-204N11.2	No	No	Yes	14	98252902	98255593	-1	lincRNA	NA	NA	NA	NA	0	0	0	NA	NA	NA	NA	Yes	IMR90:Mesenchymal_Stem_Cell:hESC	1.415e-08	rs34486793	15
ENSG00000246223	C14orf64	No	Yes	Yes	14	98391947	98444461	-1	protein_coding	388011	C14orf64	NA	NA	0	0	7	4.35498e-07	3.63129e-05	BIOSQTL/BIOS_eQTL_geneLevel:GTEx/v8/Adrenal_Gland	-	Yes	IMR90:Mesenchymal_Stem_Cell:Mesendoderm:Neural_Progenitor_Cell:hESC	1.415e-08	rs2008259	15
ENSG00000259097	RP11-61O1.1	Yes	Yes	No	14	98534577	98671480	-1	lincRNA	NA	NA	NA	NA	9	18.75	7	1.50744e-06	2.34619e-22	BIOSQTL/BIOS_eQTL_geneLevel:GTEx/v8/Testis	+	No	NA	1.415e-08	rs34486793	15
ENSG00000258511	RP11-61O1.2	No	Yes	Yes	14	98602411	98605579	1	lincRNA	NA	NA	NA	NA	0	0	2	2.18009e-05	0.0138322	BIOSQTL/BIOS_eQTL_geneLevel	+	Yes	Left_Ventricle:Spleen:Mesenchymal_Stem_Cell:Mesendoderm:hESC	1.415e-08	rs34486793	15
ENSG00000222066	AL163760.1	No	No	Yes	14	98797969	98798087	-1	miRNA	NA	NA	NA	NA	0	0	0	NA	NA	NA	NA	Yes	Mesenchymal_Stem_Cell:Mesendoderm:hESC	1.415e-08	rs34486793	15
ENSG00000258795	RP11-1082A3.1	No	No	Yes	14	98963469	98981135	1	lincRNA	NA	NA	NA	NA	0	0	0	NA	NA	NA	NA	Yes	Aorta:Left_Ventricle:IMR90:Mesenchymal_Stem_Cell:Mesendoderm:Neural_Progenitor_Cell:Trophoblast-like_Cell:hESC	1.415e-08	rs34486793	15
ENSG00000176605	C14orf177	No	No	Yes	14	99177950	99184098	1	protein_coding	283598	C14orf177	0.00674702	-0.809037	0	0	0	NA	NA	NA	NA	Yes	IMR90:Mesenchymal_Stem_Cell:Mesendoderm:Trophoblast-like_Cell:hESC	1.415e-08	rs34486793	15
ENSG00000237342	AL132796.1	No	No	Yes	14	99311233	99311934	1	lincRNA	NA	NA	NA	NA	0	0	0	NA	NA	NA	NA	Yes	IMR90:Mesenchymal_Stem_Cell:Mesendoderm:Trophoblast-like_Cell:hESC	1.415e-08	rs34486793	15
ENSG00000259119	RP11-1127D7.1	No	No	Yes	14	99391474	99394142	-1	lincRNA	NA	NA	NA	NA	0	0	0	NA	NA	NA	NA	Yes	IMR90:Mesendoderm:hESC	1.415e-08	rs34486793	15
ENSG00000232573	RPL3P4	No	No	Yes	14	99439216	99439638	-1	pseudogene	326307	RPL3P4	NA	NA	0	0	0	NA	NA	NA	NA	Yes	IMR90:Mesenchymal_Stem_Cell:Mesendoderm:hESC	1.415e-08	rs34486793	15
ENSG00000234648	AL162151.3	No	No	Yes	14	99439651	99439808	1	pseudogene	NA	NA	NA	NA	0	0	0	NA	NA	NA	NA	Yes	IMR90:Mesenchymal_Stem_Cell:Mesendoderm:Trophoblast-like_Cell:hESC	1.415e-08	rs34486793	15
ENSG00000229402	AL162151.4	No	No	Yes	14	99624753	99626006	1	antisense	NA	NA	NA	NA	0	0	0	NA	NA	NA	NA	Yes	GM12878:IMR90:Mesenchymal_Stem_Cell:Mesendoderm:Neural_Progenitor_Cell:Trophoblast-like_Cell:hESC	1.415e-08	rs34486793	15
ENSG00000127152	BCL11B	No	No	Yes	14	99635624	99737861	-1	protein_coding	64919	BCL11B	0.929785	-2.62425	0	0	0	NA	NA	NA	NA	Yes	Mesendoderm:Neural_Progenitor_Cell:Trophoblast-like_Cell:hESC	1.415e-08	rs34486793	15
ENSG00000235785	AL109767.1	No	No	Yes	14	99729285	99731072	1	antisense	NA	NA	NA	NA	0	0	0	NA	NA	NA	NA	Yes	Mesendoderm:Neural_Progenitor_Cell:Trophoblast-like_Cell:hESC	1.415e-08	rs34486793	15
ENSG00000258383	CTD-2200A16.1	No	No	Yes	14	99791136	99798352	-1	lincRNA	NA	NA	NA	NA	0	0	0	NA	NA	NA	NA	Yes	IMR90:Mesenchymal_Stem_Cell:Mesendoderm:hESC	1.415e-08	rs34486793	15
ENSG00000216173	AL132819.1	No	No	Yes	14	99828628	99828716	1	miRNA	NA	NA	NA	NA	0	0	0	NA	NA	NA	NA	Yes	Mesenchymal_Stem_Cell:Mesendoderm:hESC	1.415e-08	rs34486793	15
ENSG00000183576	SETD3	No	No	Yes	14	99864083	99947216	-1	protein_coding	84193	SETD3	0.371891	-0.140743	0	0	0	NA	NA	NA	NA	Yes	Mesendoderm:Trophoblast-like_Cell:hESC	1.415e-08	rs34486793	15
ENSG00000272439	U6	No	No	Yes	14	99910643	99910749	1	snRNA	NA	NA	NA	NA	0	0	0	NA	NA	NA	NA	Yes	hESC	1.415e-08	rs34486793	15
ENSG00000090061	CCNK	No	No	Yes	14	99947506	100001381	1	protein_coding	8812	CCNK	0.997144	-1.24827	0	0	0	NA	NA	NA	NA	Yes	Mesendoderm:Trophoblast-like_Cell:hESC	1.415e-08	rs34486793	15
ENSG00000206761	U3	No	No	Yes	14	101611818	101612032	-1	snoRNA	NA	NA	NA	NA	0	0	0	NA	NA	NA	NA	Yes	Mesenchymal_Stem_Cell	1.415e-08	rs34486793	15
ENSG00000132819	RBM38	No	Yes	No	20	55966463	55984389	1	protein_coding	55544	RBM38	0.859283	-0.0950351	0	0	3	6.83625e-05	0.0241301	GTEx/v8/Thyroid	-	No	NA	6.52e-07	rs62205791	18
ENSG00000124225	PMEPA1	No	Yes	No	20	56223448	56286592	-1	protein_coding	56937	PMEPA1	0.416595	2.57911	0	0	3	1.78664e-26	3.41549e-21	GTEx/v8/Artery_Aorta:GTEx/v8/Artery_Tibial:GTEx/v8/Heart_Atrial_Appendage:GTEx/v8/Heart_Left_Ventricle:GTEx/v8/Spleen	-	No	NA	6.52e-07	rs62205791	18
ENSG00000221007	AL354984.1	No	No	Yes	20	56493940	56494091	1	miRNA	NA	NA	NA	NA	0	0	0	NA	NA	NA	NA	Yes	IMR90:Mesendoderm:Trophoblast-like_Cell	6.52e-07	rs62205791	18
ENSG00000221385	AL354984.2	No	No	Yes	20	56642512	56642663	1	miRNA	NA	NA	NA	NA	0	0	0	NA	NA	NA	NA	Yes	Left_Ventricle:Liver:IMR90:Mesenchymal_Stem_Cell:Mesendoderm:Trophoblast-like_Cell:hESC	6.52e-07	rs62205791	18
ENSG00000225708	RP13-379L11.1	No	No	Yes	20	56644110	56647126	-1	lincRNA	NA	NA	NA	NA	0	0	0	NA	NA	NA	NA	Yes	Left_Ventricle:Liver:IMR90:Mesenchymal_Stem_Cell:Mesendoderm:Trophoblast-like_Cell:hESC	6.52e-07	rs62205791	18
ENSG00000270411	RP13-379L11.3	No	No	Yes	20	56672323	56672647	1	pseudogene	NA	NA	NA	NA	0	0	0	NA	NA	NA	NA	Yes	Left_Ventricle:Liver:IMR90:Mesenchymal_Stem_Cell:Mesendoderm:Trophoblast-like_Cell:hESC	6.52e-07	rs62205791	18
ENSG00000124237	C20orf85	No	No	Yes	20	56725960	56736206	1	protein_coding	128602	C20orf85	1.3845e-05	-0.140335	0	0	0	NA	NA	NA	NA	Yes	IMR90:hESC	6.52e-07	rs62205791	18
ENSG00000235590	GNAS-AS1	No	No	Yes	20	57393974	57425958	-1	antisense	149775	GNAS-AS1	NA	NA	0	0	0	NA	NA	NA	NA	Yes	IMR90	6.52e-07	rs62205791	18
ENSG00000268333	RP4-806M20.3	No	No	Yes	20	57408864	57411584	-1	lincRNA	NA	NA	NA	NA	0	0	0	NA	NA	NA	NA	Yes	IMR90	6.52e-07	rs62205791	18
ENSG00000087460	GNAS	No	No	Yes	20	57414773	57486247	1	protein_coding	2778	GNAS	0.99954	-0.61056	0	0	0	NA	NA	NA	NA	Yes	IMR90	6.52e-07	rs62205791	18
ENSG00000124205	EDN3	No	No	Yes	20	57875482	57901047	1	protein_coding	1908	EDN3	0.0723949	-1.11128	0	0	0	NA	NA	NA	NA	Yes	IMR90:Mesenchymal_Stem_Cell	6.52e-07	rs62205791	18
ENSG00000141458	NPC1	No	No	Yes	18	21086148	21166862	-1	protein_coding	4864	NPC1	0.000213375	-0.263911	0	0	0	NA	NA	NA	NA	Yes	Mesenchymal_Stem_Cell	8.313e-07	rs9949754	16
ENSG00000199366	Y_RNA	No	No	Yes	18	21161980	21162085	-1	misc_RNA	NA	NA	NA	NA	0	0	0	NA	NA	NA	NA	Yes	Mesenchymal_Stem_Cell	8.313e-07	rs9949754	16
ENSG00000267301	RPL23AP77	No	No	Yes	18	21289789	21290251	-1	pseudogene	728538	RPL23AP77	NA	NA	0	0	0	NA	NA	NA	NA	Yes	IMR90:Mesenchymal_Stem_Cell	8.313e-07	rs9949754	16
ENSG00000221389	AC010754.1	No	No	Yes	18	21474079	21474170	-1	miRNA	NA	NA	NA	NA	0	0	0	NA	NA	NA	NA	Yes	IMR90	8.313e-07	rs9949754	16
ENSG00000265204	RP11-403A21.3	No	No	Yes	18	21656758	21679284	-1	antisense	NA	NA	NA	NA	0	0	0	NA	NA	NA	NA	Yes	Mesenchymal_Stem_Cell	8.313e-07	rs9949754	16
ENSG00000264924	RP11-799B12.2	No	No	Yes	18	21693601	21700967	-1	antisense	NA	NA	NA	NA	0	0	0	NA	NA	NA	NA	Yes	IMR90:Mesenchymal_Stem_Cell	8.313e-07	rs9949754	16
ENSG00000206863	RNU5A-6P	No	No	Yes	18	21704134	21704249	-1	snRNA	100873871	RNU5A-6P	NA	NA	0	0	0	NA	NA	NA	NA	Yes	IMR90:Mesenchymal_Stem_Cell	8.313e-07	rs9949754	16
ENSG00000154040	CABYR	No	No	Yes	18	21718942	21741567	1	protein_coding	26256	CABYR	0.000210501	0.358483	0	0	0	NA	NA	NA	NA	Yes	IMR90:Mesenchymal_Stem_Cell	8.313e-07	rs9949754	16
ENSG00000265750	RP11-799B12.4	No	No	Yes	18	21739473	21742175	-1	lincRNA	NA	NA	NA	NA	0	0	0	NA	NA	NA	NA	Yes	IMR90:Mesendoderm	8.313e-07	rs9949754	16
ENSG00000141447	OSBPL1A	Yes	No	No	18	21742008	21977844	-1	protein_coding	114876	OSBPL1A	4.10679e-05	-0.406105	2	8.593	0	NA	NA	NA	NA	No	NA	8.313e-07	rs9949754	16
ENSG00000199874	RNA5SP452	No	No	Yes	18	21750469	21750587	-1	rRNA	100873697	RNA5SP452	NA	NA	0	0	0	NA	NA	NA	NA	Yes	IMR90:Mesendoderm	8.313e-07	rs9949754	16
ENSG00000206766	RNU6-435P	Yes	No	Yes	18	21798264	21798368	1	snRNA	106479758	RNU6-435P	NA	NA	2	8.593	0	NA	NA	NA	NA	Yes	Left_Ventricle:IMR90:Mesenchymal_Stem_Cell:Mesendoderm:Trophoblast-like_Cell:hESC	8.313e-07	rs9949754	16
ENSG00000265259	RN7SL247P	No	No	Yes	18	21852889	21853170	-1	misc_RNA	NA	RN7SL247P	NA	NA	0	0	0	NA	NA	NA	NA	Yes	Left_Ventricle:Liver:GM12878:IMR90:Mesenchymal_Stem_Cell:Mesendoderm:Trophoblast-like_Cell:hESC	8.313e-07	rs9949754	16
ENSG00000212051	MIR320C2	No	No	Yes	18	21901650	21901699	1	miRNA	100302195	MIR320C2	NA	NA	0	0	0	NA	NA	NA	NA	Yes	IMR90:Mesenchymal_Stem_Cell:Mesendoderm:hESC	8.313e-07	rs9949754	16
ENSG00000264365	RP11-621L6.2	No	No	Yes	18	21944751	21947948	1	antisense	NA	NA	NA	NA	0	0	0	NA	NA	NA	NA	Yes	IMR90:Mesenchymal_Stem_Cell	8.313e-07	rs9949754	16
ENSG00000134489	HRH4	No	No	Yes	18	22040593	22059921	1	protein_coding	59340	HRH4	1.67289e-07	1.50956	0	0	0	NA	NA	NA	NA	Yes	Mesenchymal_Stem_Cell:Mesendoderm:hESC	8.313e-07	rs9949754	16
ENSG00000264695	RP11-178F10.2	No	No	Yes	18	22069339	22071044	1	lincRNA	NA	NA	NA	NA	0	0	0	NA	NA	NA	NA	Yes	Mesenchymal_Stem_Cell:Mesendoderm:hESC	8.313e-07	rs9949754	16
ENSG00000242216	RN7SL97P	No	No	Yes	18	23398200	23398496	-1	misc_RNA	106479258	RN7SL97P	NA	NA	0	0	0	NA	NA	NA	NA	Yes	Mesenchymal_Stem_Cell	8.313e-07	rs9949754	16
ENSG00000264193	RP11-737G21.1	No	No	Yes	18	23533180	23533432	-1	pseudogene	NA	NA	NA	NA	0	0	0	NA	NA	NA	NA	Yes	Mesenchymal_Stem_Cell	8.313e-07	rs9949754	16
ENSG00000251838	SNORA31	No	No	Yes	11	37723675	37723770	-1	snoRNA	677814	SNORA31	NA	NA	0	0	0	NA	NA	NA	NA	Yes	Left_Ventricle:Mesenchymal_Stem_Cell:Mesendoderm:Neural_Progenitor_Cell:Trophoblast-like_Cell:hESC	1.815e-06	rs983360	9
ENSG00000242834	RPL7AP56	No	No	Yes	11	37747216	37748006	1	pseudogene	100271536	RPL7AP56	NA	NA	0	0	0	NA	NA	NA	NA	Yes	Left_Ventricle:Mesenchymal_Stem_Cell:Mesendoderm:Neural_Progenitor_Cell:Trophoblast-like_Cell:hESC	1.815e-06	rs983360	9
ENSG00000254516	RP11-159D8.1	No	No	Yes	11	37960151	37976213	1	lincRNA	105376633	LOC105376633	NA	NA	0	0	0	NA	NA	NA	NA	Yes	Liver:IMR90:Mesenchymal_Stem_Cell:Mesendoderm:Trophoblast-like_Cell:hESC	1.815e-06	rs983360	9
ENSG00000254784	RP11-436H16.1	No	No	Yes	11	38232939	38234349	1	pseudogene	NA	NA	NA	NA	0	0	0	NA	NA	NA	NA	Yes	Mesenchymal_Stem_Cell:Mesendoderm:hESC	1.815e-06	rs983360	9
ENSG00000255477	RP11-63D14.1	No	Yes	Yes	11	38520545	38521736	1	lincRNA	NA	NA	NA	NA	0	0	14	4.08552e-16	0	BIOSQTL/BIOS_eQTL_geneLevel	NA	Yes	Left_Ventricle:Mesenchymal_Stem_Cell:Mesendoderm:hESC	1.815e-06	rs983360	9
ENSG00000255175	RP11-277K23.1	Yes	Yes	Yes	11	38639814	38667906	-1	lincRNA	103312105	LOC103312105	NA	NA	50	8.266	56	3.54798e-11	3.02852e-07	GTEx/v8/Testis	NA	Yes	Left_Ventricle:Mesenchymal_Stem_Cell:Mesendoderm:hESC	1.815e-06	rs983360	9
ENSG00000240975	RP11-313M3.1	No	No	Yes	11	39183003	39183517	1	pseudogene	NA	NA	NA	NA	0	0	0	NA	NA	NA	NA	Yes	Mesendoderm:hESC	1.815e-06	rs983360	9
ENSG00000201591	RNU6-99P	No	No	Yes	11	39282657	39282763	1	snRNA	106479610	RNU6-99P	NA	NA	0	0	0	NA	NA	NA	NA	Yes	hESC	1.815e-06	rs983360	9
ENSG00000255347	RP11-40H19.1	No	No	Yes	11	40105260	40106067	-1	pseudogene	NA	NA	NA	NA	0	0	0	NA	NA	NA	NA	Yes	Mesenchymal_Stem_Cell	1.815e-06	rs983360	9
ENSG00000148948	LRRC4C	No	No	Yes	11	40135753	41481323	-1	protein_coding	57689	LRRC4C	0.953731	-1.11504	0	0	0	NA	NA	NA	NA	Yes	IMR90:Mesenchymal_Stem_Cell	1.815e-06	rs983360	9
ENSG00000254579	RP11-407P18.1	No	No	Yes	11	40466854	40468691	-1	pseudogene	NA	NA	NA	NA	0	0	0	NA	NA	NA	NA	Yes	Left_Ventricle:IMR90:Mesenchymal_Stem_Cell	1.815e-06	rs983360	9
ENSG00000266526	AC090720.1	No	No	Yes	11	40635652	40635765	1	miRNA	NA	NA	NA	NA	0	0	0	NA	NA	NA	NA	Yes	IMR90:Mesenchymal_Stem_Cell	1.815e-06	rs983360	9
ENSG00000255132	RP11-63C8.1	No	No	Yes	11	41416145	41448054	1	lincRNA	NA	NA	NA	NA	0	0	0	NA	NA	NA	NA	Yes	IMR90	1.815e-06	rs983360	9
ENSG00000242729	RP11-124G5.1	No	No	Yes	11	41559984	41560536	1	pseudogene	NA	NA	NA	NA	0	0	0	NA	NA	NA	NA	Yes	IMR90	1.815e-06	rs983360	9
ENSG00000230873	STMND1	No	No	Yes	6	17102489	17131603	1	protein_coding	401236	STMND1	NA	-0.50121	0	0	0	NA	NA	NA	NA	Yes	Left_Ventricle	2.615e-06	rs6902848	5
ENSG00000184612	RPL7P26	No	No	Yes	6	17531130	17531883	-1	pseudogene	728380	RPL7P26	NA	NA	0	0	0	NA	NA	NA	NA	Yes	Mesenchymal_Stem_Cell	2.615e-06	rs6902848	5
ENSG00000218359	SUMO2P13	No	No	Yes	6	17582265	17582536	1	pseudogene	106480263	SUMO2P13	NA	NA	0	0	0	NA	NA	NA	NA	Yes	Mesenchymal_Stem_Cell:hESC	2.615e-06	rs6902848	5
ENSG00000137414	FAM8A1	No	No	Yes	6	17600586	17611950	1	protein_coding	51439	FAM8A1	0.170368	-0.252582	0	0	0	NA	NA	NA	NA	Yes	Left_Ventricle:IMR90:Mesenchymal_Stem_Cell:Mesendoderm:Trophoblast-like_Cell:hESC	2.615e-06	rs6902848	5
ENSG00000124789	NUP153	No	No	Yes	6	17615269	17706656	-1	protein_coding	9972	NUP153	0.999994	-0.738666	0	0	0	NA	NA	NA	NA	Yes	Promoter_anchored_loops:Left_Ventricle:IMR90:Mesenchymal_Stem_Cell:Mesendoderm:Trophoblast-like_Cell:hESC	2.615e-06	rs6902848	5
ENSG00000206881	RNU6-190P	No	No	Yes	6	17619764	17619865	1	snRNA	106481236	RNU6-190P	NA	NA	0	0	0	NA	NA	NA	NA	Yes	Left_Ventricle:IMR90:Mesenchymal_Stem_Cell:Mesendoderm:Trophoblast-like_Cell:hESC	2.615e-06	rs6902848	5
ENSG00000272269	RP11-500C11.3	No	No	Yes	6	17706488	17707575	1	antisense	105374952	LOC105374952	NA	NA	0	0	0	NA	NA	NA	NA	Yes	Promoter_anchored_loops:Left_Ventricle:IMR90:Mesenchymal_Stem_Cell:Mesendoderm:Trophoblast-like_Cell:hESC	2.615e-06	rs6902848	5
ENSG00000137177	KIF13A	No	No	Yes	6	17759414	17987854	-1	protein_coding	63971	KIF13A	0.999959	NA	0	0	0	NA	NA	NA	NA	Yes	IMR90:Mesenchymal_Stem_Cell:Mesendoderm:Trophoblast-like_Cell:hESC	2.615e-06	rs6902848	5
ENSG00000203518	AL023807.1	No	No	Yes	6	17894075	17894300	1	pseudogene	NA	NA	NA	NA	0	0	0	NA	NA	NA	NA	Yes	IMR90:Mesenchymal_Stem_Cell:Mesendoderm:Trophoblast-like_Cell:hESC	2.615e-06	rs6902848	5
ENSG00000220920	RP3-525L6.2	No	No	Yes	6	17953803	17954161	1	pseudogene	NA	NA	NA	NA	0	0	0	NA	NA	NA	NA	Yes	Aorta:Left_Ventricle:Liver:Pancreas:IMR90:Mesenchymal_Stem_Cell:Mesendoderm:Neural_Progenitor_Cell:Trophoblast-like_Cell:hESC	2.615e-06	rs6902848	5
ENSG00000137364	TPMT	Yes	Yes	No	6	18128542	18155305	-1	protein_coding	7172	TPMT	7.57392e-05	-0.842227	8	12.82	27	4.38082e-19	0	DICE/T_CD4_naive_activated:DICE/Monocyte_classical:BIOSQTL/BIOS_eQTL_geneLevel:GTEx/v8/Adipose_Subcutaneous:GTEx/v8/Whole_Blood:GTEx/v8/Artery_Aorta:GTEx/v8/Artery_Tibial:GTEx/v8/Lung:GTEx/v8/Cells_Cultured_fibroblasts:GTEx/v8/Testis:GTEx/v8/Thyroid	+	No	NA	2.615e-06	rs6902848	5
ENSG00000124795	DEK	No	Yes	Yes	6	18224099	18265054	-1	protein_coding	7913	DEK	0.102359	-0.690054	0	0	22	1.00133e-05	0.00710254	GTEx/v8/Thyroid	+	Yes	Promoter_anchored_loops	2.615e-06	rs6902848	5
ENSG00000200681	RNU6-263P	No	No	Yes	6	18307204	18307310	-1	snRNA	106479683	RNU6-263P	NA	NA	0	0	0	NA	NA	NA	NA	Yes	IMR90	2.615e-06	rs6902848	5
ENSG00000217414	RP11-528A10.2	No	No	Yes	6	18363648	18365654	-1	pseudogene	NA	NA	NA	NA	0	0	0	NA	NA	NA	NA	Yes	IMR90	2.615e-06	rs6902848	5
ENSG00000218976	RP11-528A10.1	No	Yes	Yes	6	18366967	18368875	-1	pseudogene	NA	NA	NA	NA	0	0	4	0.000129964	5.71621e-05	GTEx/v8/Thyroid	+	Yes	IMR90	2.615e-06	rs6902848	5
ENSG00000137393	RNF144B	No	Yes	Yes	6	18368779	18469105	1	protein_coding	255488	RNF144B	0.0276377	3.88268	0	0	1	2.43577e-10	0	BIOSQTL/BIOS_eQTL_geneLevel	+	Yes	IMR90	2.615e-06	rs6902848	5
ENSG00000112242	E2F3	No	No	Yes	6	20402398	20493941	1	protein_coding	1871	E2F3	0.842458	-1.60928	0	0	0	NA	NA	NA	NA	Yes	Mesenchymal_Stem_Cell	2.615e-06	rs6902848	5
ENSG00000240869	RN7SL128P	No	No	Yes	6	20421812	20422118	-1	misc_RNA	106481826	RN7SL128P	NA	NA	0	0	0	NA	NA	NA	NA	Yes	Mesenchymal_Stem_Cell	2.615e-06	rs6902848	5
ENSG00000252949	AL136303.1	No	No	Yes	6	20422549	20422632	1	miRNA	NA	NA	NA	NA	0	0	0	NA	NA	NA	NA	Yes	Mesenchymal_Stem_Cell	2.615e-06	rs6902848	5
ENSG00000224707	E2F3-IT1	No	No	Yes	6	20438052	20440409	1	sense_intronic	100874268	E2F3-IT1	NA	NA	0	0	0	NA	NA	NA	NA	Yes	Mesenchymal_Stem_Cell	2.615e-06	rs6902848	5
ENSG00000221560	MIR1302-1	No	No	Yes	12	113132839	113132981	-1	miRNA	100302227	MIR1302-1	NA	NA	0	0	0	NA	NA	NA	NA	Yes	IMR90:Mesenchymal_Stem_Cell:Trophoblast-like_Cell	2.74e-06	rs1001563	11
ENSG00000238487	RNU7-114P	No	No	Yes	12	114040596	114040658	-1	snRNA	NA	RNU7-114P	NA	NA	0	0	0	NA	NA	NA	NA	Yes	IMR90:Mesenchymal_Stem_Cell	2.74e-06	rs1001563	11
ENSG00000122965	RBM19	No	Yes	Yes	12	114254543	114404176	-1	protein_coding	9904	RBM19	1.62207e-05	1.13258	0	0	13	8.23429e-06	0.0056732	BIOSQTL/BIOS_eQTL_geneLevel	-	Yes	IMR90:Mesendoderm:hESC	2.74e-06	rs1001563	11
ENSG00000257359	RP11-780K2.1	No	No	Yes	12	114370374	114375060	1	antisense	NA	NA	NA	NA	0	0	0	NA	NA	NA	NA	Yes	Left_Ventricle:IMR90:Mesendoderm:Trophoblast-like_Cell:hESC	2.74e-06	rs1001563	11
ENSG00000257603	RP11-100F15.1	Yes	No	Yes	12	114514938	114517707	1	lincRNA	NA	NA	NA	NA	12	4.796	0	NA	NA	NA	NA	Yes	Aorta:Dorsolateral_Prefrontal_Cortex:Left_Ventricle:Liver:Pancreas:Right_Ventricle:Spleen:IMR90:Mesenchymal_Stem_Cell:Mesendoderm:Neural_Progenitor_Cell:Trophoblast-like_Cell:hESC	2.74e-06	rs1001563	11
ENSG00000257997	RP11-100F15.2	Yes	No	Yes	12	114518186	114551294	1	lincRNA	NA	NA	NA	NA	22	9.347	0	NA	NA	NA	NA	Yes	Aorta:Dorsolateral_Prefrontal_Cortex:Left_Ventricle:Liver:Pancreas:Right_Ventricle:Spleen:IMR90:Mesenchymal_Stem_Cell:Mesendoderm:Neural_Progenitor_Cell:Trophoblast-like_Cell:hESC	2.74e-06	rs1001563	11
ENSG00000257300	HAUS8P1	Yes	No	Yes	12	114535487	114536028	1	pseudogene	100420901	HAUS8P1	NA	NA	5	9.347	0	NA	NA	NA	NA	Yes	Aorta:Bladder:Dorsolateral_Prefrontal_Cortex:Left_Ventricle:Liver:Lung:Pancreas:Psoas:Right_Ventricle:Small_Bowel:Spleen:IMR90:Mesenchymal_Stem_Cell:Mesendoderm:Neural_Progenitor_Cell:Trophoblast-like_Cell:hESC	2.74e-06	rs1001563	11
ENSG00000257915	GLULP5	Yes	Yes	Yes	12	114542347	114543736	1	pseudogene	100421694	GLULP5	NA	NA	4	5.124	28	1.21266e-05	8.1287e-05	GTEx/v8/Testis	-	Yes	Aorta:Bladder:Dorsolateral_Prefrontal_Cortex:Left_Ventricle:Liver:Lung:Pancreas:Psoas:Right_Ventricle:Small_Bowel:Spleen:IMR90:Mesenchymal_Stem_Cell:Mesendoderm:Neural_Progenitor_Cell:Trophoblast-like_Cell:hESC	2.74e-06	rs1001563	11
ENSG00000257476	RP11-139B1.1	No	No	Yes	12	114676775	114679575	-1	lincRNA	105369996	LINC02459	NA	NA	0	0	0	NA	NA	NA	NA	Yes	Left_Ventricle:Pancreas:Spleen:IMR90:Mesenchymal_Stem_Cell:Mesendoderm:Trophoblast-like_Cell:hESC	2.74e-06	rs1001563	11
ENSG00000089225	TBX5	No	No	Yes	12	114791736	114846247	-1	protein_coding	6910	TBX5	0.991879	-0.562004	0	0	0	NA	NA	NA	NA	Yes	Left_Ventricle:Liver:IMR90:Mesenchymal_Stem_Cell:Mesendoderm:Neural_Progenitor_Cell:Trophoblast-like_Cell:hESC	2.74e-06	rs1001563	11
ENSG00000255399	TBX5-AS1	No	No	Yes	12	114845996	114850636	1	antisense	255480	TBX5-AS1	NA	NA	0	0	0	NA	NA	NA	NA	Yes	Left_Ventricle:Liver:IMR90:Mesenchymal_Stem_Cell:Mesendoderm:Neural_Progenitor_Cell:Trophoblast-like_Cell:hESC	2.74e-06	rs1001563	11
ENSG00000222982	RN7SKP216	No	No	Yes	12	114942681	114942992	-1	misc_RNA	106479190	RN7SKP216	NA	NA	0	0	0	NA	NA	NA	NA	Yes	Promoter_anchored_loops:Aorta:Left_Ventricle:Liver:Lung:Pancreas:Right_Ventricle:Spleen:IMR90:Mesenchymal_Stem_Cell:Mesendoderm:Neural_Progenitor_Cell:Trophoblast-like_Cell:hESC	2.74e-06	rs1001563	11:12:00
ENSG00000255830	RP11-385N17.3	No	No	Yes	12	114986659	114987657	1	pseudogene	NA	NA	NA	NA	0	0	0	NA	NA	NA	NA	Yes	Left_Ventricle:IMR90:Mesenchymal_Stem_Cell:Mesendoderm:hESC	2.74e-06	rs1001563	11:12:00
ENSG00000265632	AC069240.1	No	No	Yes	12	114988567	114988654	-1	miRNA	NA	NA	NA	NA	0	0	0	NA	NA	NA	NA	Yes	Left_Ventricle:IMR90:Mesenchymal_Stem_Cell:Mesendoderm:hESC	2.74e-06	rs1001563	11:12:00
ENSG00000258244	OSTF1P1	No	No	Yes	12	115025999	115026607	1	pseudogene	386654	OSTF1P1	NA	NA	0	0	0	NA	NA	NA	NA	Yes	Left_Ventricle:IMR90:Mesendoderm:Trophoblast-like_Cell:hESC	2.74e-06	rs1001563	11
ENSG00000258254	RP11-162N7.1	No	No	Yes	12	115059566	115060727	1	lincRNA	NA	NA	NA	NA	0	0	0	NA	NA	NA	NA	Yes	Aorta:Left_Ventricle:Liver:IMR90:Mesenchymal_Stem_Cell:Mesendoderm:Trophoblast-like_Cell:hESC	2.74e-06	rs1001563	11:12:00
ENSG00000252459	SNORA27	No	No	Yes	12	115175509	115175603	1	snoRNA	619499	SNORA27	NA	NA	0	0	0	NA	NA	NA	NA	Yes	Mesendoderm:hESC	2.74e-06	rs1001563	11
ENSG00000257519	RP11-116D17.2	No	No	Yes	12	115700975	115708401	1	lincRNA	NA	NA	NA	NA	0	0	0	NA	NA	NA	NA	Yes	Left_Ventricle:IMR90:Mesenchymal_Stem_Cell:Mesendoderm:Trophoblast-like_Cell:hESC	2.74e-06	rs1001563	11
ENSG00000271579	RP11-116D17.3	No	No	Yes	12	115737393	115738513	-1	lincRNA	NA	NA	NA	NA	0	0	0	NA	NA	NA	NA	Yes	Left_Ventricle:Pancreas:IMR90:Mesenchymal_Stem_Cell:Mesendoderm:Trophoblast-like_Cell:hESC	2.74e-06	rs1001563	11
ENSG00000257726	RP11-116D17.1	No	No	Yes	12	115800817	115802550	1	protein_coding	NA	NA	NA	NA	0	0	0	NA	NA	NA	NA	Yes	Left_Ventricle:IMR90:Mesendoderm:hESC	2.74e-06	rs1001563	11
ENSG00000258108	RP11-1028N23.3	No	No	Yes	12	116007469	116019544	1	lincRNA	NA	NA	NA	NA	0	0	0	NA	NA	NA	NA	Yes	IMR90:Mesenchymal_Stem_Cell:Mesendoderm:Trophoblast-like_Cell	2.74e-06	rs1001563	11
ENSG00000258280	RP11-1028N23.2	No	No	Yes	12	116014481	116015420	1	lincRNA	NA	NA	NA	NA	0	0	0	NA	NA	NA	NA	Yes	IMR90:Mesenchymal_Stem_Cell:Mesendoderm:Trophoblast-like_Cell	2.74e-06	rs1001563	11
ENSG00000257407	RP11-1028N23.4	No	No	Yes	12	116019866	116077539	-1	lincRNA	NA	NA	NA	NA	0	0	0	NA	NA	NA	NA	Yes	IMR90:Mesenchymal_Stem_Cell:Mesendoderm	2.74e-06	rs1001563	11
ENSG00000241656	UBA52P7	No	No	Yes	12	116030409	116030788	-1	pseudogene	100128617	UBA52P7	NA	NA	0	0	0	NA	NA	NA	NA	Yes	IMR90:Mesenchymal_Stem_Cell:Mesendoderm:Trophoblast-like_Cell	2.74e-06	rs1001563	11
ENSG00000240205	RN7SL865P	No	No	Yes	12	116155530	116155816	1	misc_RNA	106481154	RN7SL865P	NA	NA	0	0	0	NA	NA	NA	NA	Yes	Left_Ventricle:Liver:IMR90:Mesenchymal_Stem_Cell:Mesendoderm:Trophoblast-like_Cell:hESC	2.74e-06	rs1001563	11
ENSG00000257781	RP11-110L15.1	No	No	Yes	12	116193067	116237741	1	lincRNA	NA	NA	NA	NA	0	0	0	NA	NA	NA	NA	Yes	Aorta:Left_Ventricle:Liver:GM12878:IMR90:Mesenchymal_Stem_Cell:Mesendoderm:Trophoblast-like_Cell:hESC	2.74e-06	rs1001563	11
ENSG00000257683	RP11-110L15.2	No	No	Yes	12	116248164	116323942	-1	lincRNA	NA	NA	NA	NA	0	0	0	NA	NA	NA	NA	Yes	IMR90:Mesenchymal_Stem_Cell:Mesendoderm:Trophoblast-like_Cell:hESC	2.74e-06	rs1001563	11
ENSG00000200112	SNORD56	No	No	Yes	12	116290453	116290523	-1	snoRNA	26793	SNORD56	NA	NA	0	0	0	NA	NA	NA	NA	Yes	Aorta:Left_Ventricle:Liver:Pancreas:IMR90:Mesenchymal_Stem_Cell:Mesendoderm:Trophoblast-like_Cell:hESC	2.74e-06	rs1001563	11
ENSG00000258034	RP11-493P1.2	No	No	Yes	12	116398992	116400538	1	antisense	NA	NA	NA	NA	0	0	0	NA	NA	NA	NA	Yes	Left_Ventricle:GM12878:IMR90:Mesenchymal_Stem_Cell:Mesendoderm:Trophoblast-like_Cell:hESC	2.74e-06	rs1001563	11
ENSG00000207967	MIR620	No	No	Yes	12	116586365	116586459	-1	miRNA	693205	MIR620	NA	NA	0	0	0	NA	NA	NA	NA	Yes	Left_Ventricle:Mesendoderm:hESC	2.74e-06	rs1001563	11
ENSG00000258018	RP11-148B3.1	No	No	Yes	12	116955663	116956625	1	lincRNA	NA	NA	NA	NA	0	0	0	NA	NA	NA	NA	Yes	Left_Ventricle	2.74e-06	rs1001563	11
ENSG00000257654	RP11-497G19.2	No	No	Yes	12	117136141	117140935	1	lincRNA	NA	NA	NA	NA	0	0	0	NA	NA	NA	NA	Yes	IMR90:Mesenchymal_Stem_Cell:Mesendoderm	2.74e-06	rs1001563	11
ENSG00000111412	C12orf49	No	No	Yes	12	117153593	117175875	-1	protein_coding	79794	C12orf49	0.0452103	-1.01496	0	0	0	NA	NA	NA	NA	Yes	Left_Ventricle:IMR90:Mesenchymal_Stem_Cell:Mesendoderm	2.74e-06	rs1001563	11
ENSG00000135119	RNFT2	No	No	Yes	12	117176096	117291436	1	protein_coding	84900	RNFT2	0.79071	2.09968	0	0	0	NA	NA	NA	NA	Yes	Left_Ventricle:IMR90:Mesenchymal_Stem_Cell:Mesendoderm	2.74e-06	rs1001563	11
ENSG00000239374	RP11-407P2.1	No	No	Yes	12	117193200	117193679	-1	pseudogene	NA	NA	NA	NA	0	0	0	NA	NA	NA	NA	Yes	Left_Ventricle:IMR90:Mesenchymal_Stem_Cell:Mesendoderm	2.74e-06	rs1001563	11
ENSG00000240100	RP11-240G22.1	No	No	Yes	12	117346117	117346432	1	pseudogene	NA	NA	NA	NA	0	0	0	NA	NA	NA	NA	Yes	Left_Ventricle:IMR90:Mesenchymal_Stem_Cell	2.74e-06	rs1001563	11
ENSG00000174989	FBXW8	No	No	Yes	12	117348761	117468953	1	protein_coding	26259	FBXW8	8.69107e-13	-0.161468	0	0	0	NA	NA	NA	NA	Yes	Left_Ventricle:IMR90:Mesenchymal_Stem_Cell	2.74e-06	rs1001563	11
ENSG00000257279	RP11-231I16.1	No	No	Yes	12	117415247	117425142	-1	antisense	100506551	LOC100506551	NA	NA	0	0	0	NA	NA	NA	NA	Yes	Left_Ventricle:Liver:IMR90:Mesenchymal_Stem_Cell:Mesendoderm:Trophoblast-like_Cell:hESC	2.74e-06	rs1001563	11
ENSG00000088992	TESC	No	No	Yes	12	117476728	117537284	-1	protein_coding	54997	TESC	0.69214	NA	0	0	0	NA	NA	NA	NA	Yes	Left_Ventricle:IMR90:Mesenchymal_Stem_Cell	2.74e-06	rs1001563	11
ENSG00000258285	RP11-103B5.2	No	No	Yes	12	117537286	117579896	1	lincRNA	NA	NA	NA	NA	0	0	0	NA	NA	NA	NA	Yes	Left_Ventricle:IMR90:Mesenchymal_Stem_Cell	2.74e-06	rs1001563	11
ENSG00000135108	FBXO21	No	No	Yes	12	117581146	117628336	-1	protein_coding	23014	FBXO21	0.990626	-0.850122	0	0	0	NA	NA	NA	NA	Yes	IMR90:Mesenchymal_Stem_Cell:Mesendoderm	2.74e-06	rs1001563	11:12:00
ENSG00000254562	RP11-64I17.1	Yes	Yes	Yes	11	38668026	38695791	1	lincRNA	101928536	LINC01493	NA	NA	71	10.78	14	4.7744e-20	3.51757e-22	GTEx/v8/Testis	NA	Yes	Left_Ventricle:Mesenchymal_Stem_Cell:Mesendoderm:hESC	2.75e-06	rs983360	9
ENSG00000252922	RNU6-365P	No	No	Yes	11	41144457	41144562	-1	snRNA	106479728	RNU6-365P	NA	NA	0	0	0	NA	NA	NA	NA	Yes	Left_Ventricle:IMR90:Mesenchymal_Stem_Cell	2.75e-06	rs983360	9
ENSG00000164400	CSF2	No	No	Yes	5	131409483	131411859	1	protein_coding	1437	CSF2	0.803849	-0.384982	0	0	0	NA	NA	NA	NA	Yes	GM12878:IMR90:Mesendoderm	2.876e-06	rs60934439	4
ENSG00000253067	snoZ6	No	No	Yes	5	131415759	131415826	1	snoRNA	NA	NA	NA	NA	0	0	0	NA	NA	NA	NA	Yes	GM12878:IMR90:Mesendoderm	2.876e-06	rs60934439	4
ENSG00000072682	P4HA2	Yes	Yes	Yes	5	131527531	131631008	-1	protein_coding	8974	P4HA2	6.46128e-05	-0.308598	2	8.815	11	5.6535e-10	0	BIOSQTL/BIOS_eQTL_geneLevel	+	Yes	IMR90:Mesenchymal_Stem_Cell:Mesendoderm:Trophoblast-like_Cell	2.876e-06	rs60934439	4
ENSG00000131435	PDLIM4	No	No	Yes	5	131593364	131609147	1	protein_coding	8572	PDLIM4	0.924089	-0.0661677	0	0	0	NA	NA	NA	NA	Yes	Adult_Cortex:Fetal_Cortex:GM12878:IMR90:Mesenchymal_Stem_Cell:Mesendoderm:Trophoblast-like_Cell:hESC	2.876e-06	rs60934439	4
ENSG00000197208	SLC22A4	Yes	Yes	Yes	5	131630136	131679899	1	protein_coding	6583	SLC22A4	4.64079e-06	-0.515619	7	9.831	24	2.49961e-41	0	BIOSQTL/BIOS_eQTL_geneLevel:GTEx/v8/Cells_Cultured_fibroblasts	-	Yes	Adult_Cortex:Fetal_Cortex:IMR90:Mesenchymal_Stem_Cell:Mesendoderm:Trophoblast-like_Cell	2.876e-06	rs60934439	4
ENSG00000233006	AC034220.3	Yes	Yes	Yes	5	131646978	131705608	-1	processed_transcript	553103	MIR3936HG	NA	NA	9	9.831	25	2.49961e-41	0	BIOSQTL/BIOS_eQTL_geneLevel:GTEx/v8/Adipose_Subcutaneous:GTEx/v8/Adipose_Visceral_Omentum:GTEx/v8/Adrenal_Gland:GTEx/v8/Whole_Blood:GTEx/v8/Artery_Coronary:GTEx/v8/Artery_Tibial:GTEx/v8/Brain_Anterior_cingulate_cortex_BA24:GTEx/v8/Brain_Caudate_basal_ganglia:GTEx/v8/Brain_Cerebellar_Hemisphere:GTEx/v8/Brain_Cortex:GTEx/v8/Brain_Frontal_Cortex_BA9:GTEx/v8/Brain_Hippocampus:GTEx/v8/Brain_Hypothalam…	+	Yes	Adult_Cortex:Fetal_Cortex:Left_Ventricle:GM12878:IMR90:Mesenchymal_Stem_Cell:Mesendoderm:Trophoblast-like_Cell:hESC	2.876e-06	rs60934439	4
ENSG00000263597	MIR3936	Yes	Yes	Yes	5	131701182	131701291	-1	miRNA	100500865	MIR3936	NA	NA	3	6.241	22	1.45295e-06	0.00119313	BIOSQTL/BIOS_eQTL_geneLevel	+	Yes	Adult_Cortex:Fetal_Cortex:Left_Ventricle:GM12878:IMR90:Mesenchymal_Stem_Cell:Mesendoderm:Trophoblast-like_Cell:hESC	2.876e-06	rs60934439	4
ENSG00000197375	SLC22A5	Yes	Yes	Yes	5	131705444	131731306	1	protein_coding	6584	SLC22A5	4.9e-09	0.858089	17	15.24	25	3.19706e-149	0	BIOSQTL/BIOS_eQTL_geneLevel:GTEx/v8/Whole_Blood:GTEx/v8/Artery_Aorta:GTEx/v8/Artery_Tibial:GTEx/v8/Colon_Sigmoid:GTEx/v8/Colon_Transverse:GTEx/v8/Esophagus_Gastroesophageal_Junction:GTEx/v8/Esophagus_Mucosa:GTEx/v8/Esophagus_Muscularis:GTEx/v8/Nerve_Tibial:GTEx/v8/Cells_Cultured_fibroblasts:GTEx/v8/Skin_Sun_Exposed_Lower_leg:GTEx/v8/Thyroid	+	Yes	Adult_Cortex:Fetal_Cortex:Left_Ventricle:GM12878:IMR90:Mesenchymal_Stem_Cell:Mesendoderm:Trophoblast-like_Cell:hESC	2.876e-06	rs60934439	4
ENSG00000197536	C5orf56	Yes	Yes	Yes	5	131746328	131811736	1	protein_coding	441108	C5orf56	0.107649	NA	4	10.69	12	3.80222e-08	8.48054e-12	BIOSQTL/BIOS_eQTL_geneLevel:GTEx/v8/Whole_Blood	+	Yes	Adult_Cortex:GM12878:IMR90:Mesenchymal_Stem_Cell:Mesendoderm:Trophoblast-like_Cell:hESC	2.876e-06	rs60934439	4
ENSG00000223442	AC004041.2	No	No	Yes	5	131966281	131999964	-1	antisense	101927761	TH2LCRR	NA	NA	0	0	0	NA	NA	NA	NA	Yes	Fetal_Cortex:Liver:GM12878:IMR90:Mesenchymal_Stem_Cell:Mesendoderm:Trophoblast-like_Cell:hESC	2.876e-06	rs60934439	4
ENSG00000113520	IL4	No	No	Yes	5	132009678	132018368	1	protein_coding	3565	IL4	0.168021	-0.00419523	0	0	0	NA	NA	NA	NA	Yes	Liver:GM12878:IMR90:Mesenchymal_Stem_Cell:Mesendoderm:Trophoblast-like_Cell:hESC	2.876e-06	rs60934439	4
ENSG00000230612	AC004237.1	No	No	Yes	5	132024373	132057275	1	antisense	NA	NA	NA	NA	0	0	0	NA	NA	NA	NA	Yes	Liver:GM12878:IMR90:Mesenchymal_Stem_Cell:Mesendoderm:Trophoblast-like_Cell:hESC	2.876e-06	rs60934439	4
ENSG00000205089	CCNI2	No	No	Yes	5	132083137	132089856	1	protein_coding	645121	CCNI2	4.53255e-05	0.828805	0	0	0	NA	NA	NA	NA	Yes	Adult_Cortex:Fetal_Cortex:Aorta:Left_Ventricle:Liver:Spleen:GM12878:IMR90:Mesenchymal_Stem_Cell:Mesendoderm:Trophoblast-like_Cell:hESC	2.876e-06	rs60934439	4
ENSG00000164402	2021-09-08	No	No	Yes	5	132086509	132142933	-1	protein_coding	23176	2021-09-08	0.954286	NA	0	0	0	NA	NA	NA	NA	Yes	Adult_Cortex:Fetal_Cortex:Left_Ventricle:Liver:Spleen:GM12878:IMR90:Mesenchymal_Stem_Cell:Mesendoderm:Trophoblast-like_Cell:hESC	2.876e-06	rs60934439	4
ENSG00000198944	SOWAHA	No	No	Yes	5	132149033	132152488	1	protein_coding	134548	SOWAHA	NA	0.0656482	0	0	0	NA	NA	NA	NA	Yes	Adult_Cortex:Fetal_Cortex:Left_Ventricle:Liver:Spleen:GM12878:IMR90:Mesenchymal_Stem_Cell:Mesendoderm:Trophoblast-like_Cell:hESC	2.876e-06	rs60934439	4
ENSG00000272203	AC004775.5	No	No	Yes	5	132152940	132153692	-1	lincRNA	NA	NA	NA	NA	0	0	0	NA	NA	NA	NA	Yes	Promoter_anchored_loops:Adult_Cortex:Fetal_Cortex:Left_Ventricle:Liver:Spleen:GM12878:IMR90:Mesenchymal_Stem_Cell:Mesendoderm:Trophoblast-like_Cell:hESC	2.876e-06	rs60934439	4
ENSG00000164403	SHROOM1	No	Yes	Yes	5	132157833	132166590	-1	protein_coding	134549	SHROOM1	0.00959555	-0.760291	0	0	12	1.35078e-05	0.0192354	GTEx/v8/Pituitary:GTEx/v8/Skin_Not_Sun_Exposed_Suprapubic	+	Yes	Promoter_anchored_loops:GM12878:IMR90:Mesenchymal_Stem_Cell:Mesendoderm	2.876e-06	rs60934439	4
ENSG00000164404	GDF9	No	No	Yes	5	132196873	132202576	-1	protein_coding	2661	GDF9	1.19472e-05	0.352488	0	0	0	NA	NA	NA	NA	Yes	Fetal_Cortex:Aorta:Hippocampus:Left_Ventricle:Liver:Right_Ventricle:Spleen:GM12878:IMR90:Mesenchymal_Stem_Cell:Mesendoderm:Trophoblast-like_Cell:hESC	2.876e-06	rs60934439	4
ENSG00000164405	UQCRQ	No	No	Yes	5	132202252	132203723	1	protein_coding	27089	UQCRQ	0.091913	-0.564493	0	0	0	NA	NA	NA	NA	Yes	Fetal_Cortex:Aorta:Hippocampus:Left_Ventricle:Liver:Right_Ventricle:Spleen:GM12878:IMR90:Mesenchymal_Stem_Cell:Mesendoderm:Trophoblast-like_Cell:hESC	2.876e-06	rs60934439	4
ENSG00000164406	LEAP2	No	No	Yes	5	132208014	132210738	1	protein_coding	116842	LEAP2	0.00789838	1.43845	0	0	0	NA	NA	NA	NA	Yes	Fetal_Cortex:Aorta:Hippocampus:Left_Ventricle:Liver:Right_Ventricle:Spleen:GM12878:IMR90:Mesenchymal_Stem_Cell:Mesendoderm:Trophoblast-like_Cell:hESC	2.876e-06	rs60934439	4
ENSG00000234589	RP11-253E3.1	No	No	Yes	12	3180698	3181314	-1	pseudogene	NA	NA	NA	NA	0	0	0	NA	NA	NA	NA	Yes	IMR90	2.877e-06	12:5750791	10
ENSG00000011105	TSPAN9	No	No	Yes	12	3186521	3395730	1	protein_coding	10867	TSPAN9	0.779778	1.65356	0	0	0	NA	NA	NA	NA	Yes	IMR90	2.877e-06	12:5750791	10
ENSG00000256691	RP11-476M19.3	No	No	Yes	12	3571884	3572752	-1	antisense	NA	NA	NA	NA	0	0	0	NA	NA	NA	NA	Yes	Mesenchymal_Stem_Cell	2.877e-06	12:5750791	10
ENSG00000243507	RP11-476M19.1	No	No	Yes	12	3578116	3578462	1	pseudogene	NA	NA	NA	NA	0	0	0	NA	NA	NA	NA	Yes	Mesenchymal_Stem_Cell	2.877e-06	12:5750791	10
ENSG00000047621	C12orf4	No	No	Yes	12	4596894	4647674	-1	protein_coding	57102	C12orf4	9.82515e-05	-0.75376	0	0	0	NA	NA	NA	NA	Yes	Mesendoderm:Trophoblast-like_Cell	2.877e-06	12:5750791	10
ENSG00000111247	RAD51AP1	No	No	Yes	12	4647950	4669214	1	protein_coding	10635	RAD51AP1	0.0223533	-0.117687	0	0	0	NA	NA	NA	NA	Yes	Mesendoderm:Trophoblast-like_Cell	2.877e-06	12:5750791	10
ENSG00000010219	DYRK4	No	No	Yes	12	4671370	4723325	1	protein_coding	8798	DYRK4	3.79609e-10	0.251197	0	0	0	NA	NA	NA	NA	Yes	Mesendoderm:Trophoblast-like_Cell	2.877e-06	12:5750791	10
ENSG00000256748	RP11-234B24.5	No	No	Yes	12	4711157	4712586	-1	pseudogene	NA	NA	NA	NA	0	0	0	NA	NA	NA	NA	Yes	IMR90	2.877e-06	12:5750791	10
ENSG00000272921	RP11-500M8.7	No	No	Yes	12	4714110	4771809	1	protein_coding	NA	NA	NA	NA	0	0	0	NA	NA	NA	NA	Yes	IMR90	2.877e-06	12:5750791	10
ENSG00000111254	AKAP3	No	No	Yes	12	4724674	4758213	-1	protein_coding	10566	AKAP3	0.026333	-0.3114	0	0	0	NA	NA	NA	NA	Yes	IMR90:Mesendoderm	2.877e-06	12:5750791	10
ENSG00000256799	RP11-500M8.6	No	No	Yes	12	4744515	4745306	-1	pseudogene	NA	NA	NA	NA	0	0	0	NA	NA	NA	NA	Yes	IMR90:Mesendoderm	2.877e-06	12:5750791	10
ENSG00000256381	RP11-500M8.4	No	No	Yes	12	4754662	4757193	1	sense_intronic	NA	NA	NA	NA	0	0	0	NA	NA	NA	NA	Yes	IMR90:Mesendoderm	2.877e-06	12:5750791	10
ENSG00000139180	NDUFA9	No	No	Yes	12	4758261	4798454	1	protein_coding	4704	NDUFA9	0.542744	0.984564	0	0	0	NA	NA	NA	NA	Yes	IMR90:Mesendoderm	2.877e-06	12:5750791	10
ENSG00000255608	RP3-377H17.2	No	No	Yes	12	4948121	4951841	1	sense_intronic	NA	NA	NA	NA	0	0	0	NA	NA	NA	NA	Yes	IMR90:Mesenchymal_Stem_Cell	2.877e-06	12:5750791	10
ENSG00000111262	KCNA1	No	No	Yes	12	5019071	5040527	1	protein_coding	3736	KCNA1	0.0518015	-0.677838	0	0	0	NA	NA	NA	NA	Yes	IMR90:Mesenchymal_Stem_Cell:Mesendoderm:hESC	2.877e-06	12:5750791	10
ENSG00000256790	RP11-429A20.3	No	No	Yes	12	5127631	5130879	1	lincRNA	NA	NA	NA	NA	0	0	0	NA	NA	NA	NA	Yes	IMR90:Mesendoderm	2.877e-06	12:5750791	10
ENSG00000256654	RP11-429A20.4	No	No	Yes	12	5132848	5134758	1	lincRNA	NA	NA	NA	NA	0	0	0	NA	NA	NA	NA	Yes	IMR90:Mesendoderm	2.877e-06	12:5750791	10
ENSG00000255996	RP11-429A20.2	No	No	Yes	12	5141554	5142107	-1	pseudogene	NA	NA	NA	NA	0	0	0	NA	NA	NA	NA	Yes	IMR90:Mesendoderm	2.877e-06	12:5750791	10
ENSG00000130037	KCNA5	No	No	Yes	12	5153085	5155949	1	protein_coding	3741	KCNA5	0.000687392	-0.0221215	0	0	0	NA	NA	NA	NA	Yes	IMR90:Mesendoderm	2.877e-06	12:5750791	10
ENSG00000256115	RP11-319E16.1	No	No	Yes	12	5343163	5352317	-1	lincRNA	101929584	LINC02443	NA	NA	0	0	0	NA	NA	NA	NA	Yes	Liver:IMR90:Mesenchymal_Stem_Cell:Mesendoderm:Trophoblast-like_Cell:hESC	2.877e-06	12:5750791	10
ENSG00000256417	RP11-1038A11.3	No	No	Yes	12	5399646	5492819	1	lincRNA	NA	NA	NA	NA	0	0	0	NA	NA	NA	NA	Yes	IMR90:Mesenchymal_Stem_Cell:Mesendoderm:hESC	2.877e-06	12:5750791	10
ENSG00000256146	RP11-319E16.2	No	No	Yes	12	5425127	5428513	1	lincRNA	NA	NA	NA	NA	0	0	0	NA	NA	NA	NA	Yes	IMR90:Mesenchymal_Stem_Cell:Mesendoderm:hESC	2.877e-06	12:5750791	10
ENSG00000256218	RP11-1038A11.2	No	No	Yes	12	5475214	5476940	-1	lincRNA	NA	NA	NA	NA	0	0	0	NA	NA	NA	NA	Yes	IMR90:Mesenchymal_Stem_Cell:Mesendoderm:hESC	2.877e-06	12:5750791	10
ENSG00000255983	RP11-1038A11.1	No	No	Yes	12	5497755	5515817	1	lincRNA	NA	NA	NA	NA	0	0	0	NA	NA	NA	NA	Yes	IMR90:Mesenchymal_Stem_Cell	2.877e-06	12:5750791	10
ENSG00000185652	NTF3	No	No	Yes	12	5541278	5630702	1	protein_coding	4908	NTF3	0.85444	NA	0	0	0	NA	NA	NA	NA	Yes	Left_Ventricle:IMR90:Mesenchymal_Stem_Cell:Mesendoderm:Neural_Progenitor_Cell:Trophoblast-like_Cell:hESC	2.877e-06	12:5750791	10
ENSG00000047617	ANO2	Yes	No	No	12	5641035	6055398	-1	protein_coding	57101	ANO2	2.84805e-18	-0.198728	10	4.811	0	NA	NA	NA	NA	No	NA	2.877e-06	12:5750791	10
ENSG00000255973	RP11-592H6.3	No	No	Yes	12	5692963	5693251	1	pseudogene	NA	NA	NA	NA	0	0	0	NA	NA	NA	NA	Yes	Left_Ventricle:Pancreas:Spleen:IMR90:Mesenchymal_Stem_Cell:Mesendoderm:Neural_Progenitor_Cell:Trophoblast-like_Cell:hESC	2.877e-06	12:5750791	10
ENSG00000166523	CLEC4E	No	No	Yes	12	8685901	8693559	-1	protein_coding	26253	CLEC4E	0.00355803	0.573692	0	0	0	NA	NA	NA	NA	Yes	Mesenchymal_Stem_Cell	2.877e-06	12:5750791	10
ENSG00000255801	RP11-561P12.5	No	No	Yes	12	8700957	8720209	-1	lincRNA	NA	NA	NA	NA	0	0	0	NA	NA	NA	NA	Yes	Mesenchymal_Stem_Cell	2.877e-06	12:5750791	10
ENSG00000234360	RP11-87N24.1	No	No	Yes	9	10532145	10532411	1	pseudogene	NA	NA	NA	NA	0	0	0	NA	NA	NA	NA	Yes	Left_Ventricle:IMR90:Mesenchymal_Stem_Cell:Mesendoderm:Neural_Progenitor_Cell:hESC	3.074e-06	rs10809696	7
ENSG00000230589	IMP3P1	No	No	Yes	9	10829752	10830308	-1	pseudogene	646087	IMP3P1	NA	NA	0	0	0	NA	NA	NA	NA	Yes	IMR90:Mesenchymal_Stem_Cell:Mesendoderm:Neural_Progenitor_Cell:hESC	3.074e-06	rs10809696	7
ENSG00000234146	RP11-109M17.1	No	No	Yes	9	11011748	11013096	1	pseudogene	NA	NA	NA	NA	0	0	0	NA	NA	NA	NA	Yes	Mesenchymal_Stem_Cell:hESC	3.074e-06	rs10809696	7
ENSG00000224935	RP11-74C3.1	Yes	No	No	9	12098660	12159147	-1	lincRNA	NA	NA	NA	NA	10	8.978	0	NA	NA	NA	NA	No	NA	3.074e-06	rs10809696	7
ENSG00000231491	RP11-71E22.1	No	No	Yes	9	12287320	12288238	1	pseudogene	NA	NA	NA	NA	0	0	0	NA	NA	NA	NA	Yes	Left_Ventricle:Mesenchymal_Stem_Cell:Mesendoderm:hESC	3.074e-06	rs10809696	7
ENSG00000222581	RNU2-47P	No	No	Yes	9	12300266	12300451	-1	snRNA	106480672	RNU2-47P	NA	NA	0	0	0	NA	NA	NA	NA	Yes	Left_Ventricle:Mesenchymal_Stem_Cell:Mesendoderm:hESC	3.074e-06	rs10809696	7
ENSG00000120685	PROSER1	No	No	Yes	13	39584003	39612252	-1	protein_coding	80209	PROSER1	0.736136	-0.470048	0	0	0	NA	NA	NA	NA	Yes	Mesenchymal_Stem_Cell:Mesendoderm:hESC	3.264e-06	rs1072605	13
ENSG00000188811	NHLRC3	No	No	Yes	13	39612443	39624246	1	protein_coding	387921	NHLRC3	0.00380866	-1.00095	0	0	0	NA	NA	NA	NA	Yes	Mesenchymal_Stem_Cell:Mesendoderm:hESC	3.264e-06	rs1072605	13
ENSG00000214823	NXT1P1	No	No	Yes	13	39743773	39744088	-1	pseudogene	100652801	NXT1P1	NA	NA	0	0	0	NA	NA	NA	NA	Yes	Aorta:Left_Ventricle:Right_Ventricle:IMR90:Mesenchymal_Stem_Cell:Mesendoderm:Neural_Progenitor_Cell:Trophoblast-like_Cell:hESC	3.264e-06	rs1072605	13
ENSG00000183722	LHFP	Yes	Yes	Yes	13	39917029	40177665	-1	protein_coding	10186	LHFP	0.463788	0.103632	48	17.05	1	2.05238e-05	9.75126e-06	GTEx/v8/Cells_EBV-transformed_lymphocytes	+	Yes	Left_Ventricle:IMR90:Mesenchymal_Stem_Cell:hESC	3.264e-06	rs1072605	13
ENSG00000238408	snoU13	No	No	Yes	13	40021252	40021353	-1	snoRNA	NA	NA	NA	NA	0	0	0	NA	NA	NA	NA	Yes	Promoter_anchored_loops:Adult_Cortex:Left_Ventricle:Liver:Right_Ventricle:IMR90:Mesenchymal_Stem_Cell:Mesendoderm:Neural_Progenitor_Cell:Trophoblast-like_Cell:hESC	3.264e-06	rs1072605	13
ENSG00000216014	AL512505.1	No	No	Yes	13	40226715	40226806	1	miRNA	NA	NA	NA	NA	0	0	0	NA	NA	NA	NA	Yes	IMR90:Mesenchymal_Stem_Cell:Mesendoderm:hESC	3.264e-06	rs1072605	13
ENSG00000133103	COG6	No	No	Yes	13	40229764	40365802	1	protein_coding	57511	COG6	6.72063e-10	0.102601	0	0	0	NA	NA	NA	NA	Yes	IMR90:Mesenchymal_Stem_Cell:Mesendoderm:hESC	3.264e-06	rs1072605	13
ENSG00000264171	MIR4305	No	No	Yes	13	40238171	40238272	-1	miRNA	100422940	MIR4305	NA	NA	0	0	0	NA	NA	NA	NA	Yes	IMR90:Mesenchymal_Stem_Cell:Mesendoderm:hESC	3.264e-06	rs1072605	13
ENSG00000215483	LINC00598	No	No	Yes	13	41025131	41055143	-1	lincRNA	646982	LINC00598	NA	NA	0	0	0	NA	NA	NA	NA	Yes	Left_Ventricle	3.264e-06	rs1072605	13
ENSG00000102710	SUPT20H	No	No	Yes	13	37583449	37633850	-1	protein_coding	55578	SUPT20H	0.00138199	-0.417264	0	0	0	NA	NA	NA	NA	Yes	Mesenchymal_Stem_Cell	3.864e-06	rs1072605	13
ENSG00000221100	AL138706.1	No	No	Yes	13	37608814	37608929	-1	miRNA	NA	NA	NA	NA	0	0	0	NA	NA	NA	NA	Yes	Mesenchymal_Stem_Cell	3.864e-06	rs1072605	13
ENSG00000180138	CSNK1A1L	No	No	Yes	13	37677398	37679803	-1	protein_coding	122011	CSNK1A1L	0.000361794	0.918204	0	0	0	NA	NA	NA	NA	Yes	IMR90	3.864e-06	rs1072605	13
ENSG00000133115	STOML3	No	No	Yes	13	39540062	39565203	-1	protein_coding	161003	STOML3	1.9729e-08	0.861195	0	0	0	NA	NA	NA	NA	Yes	hESC	3.864e-06	rs1072605	13
ENSG00000150907	FOXO1	No	No	Yes	13	41129804	41240734	-1	protein_coding	2308	FOXO1	0.96638	-1.01598	0	0	0	NA	NA	NA	NA	Yes	Left_Ventricle:Trophoblast-like_Cell	3.864e-06	rs1072605	13
ENSG00000168852	TPTE2P5	No	No	Yes	13	41396432	41495890	-1	pseudogene	100616668	TPTE2P5	NA	NA	0	0	0	NA	NA	NA	NA	Yes	IMR90	3.864e-06	rs1072605	13
ENSG00000239827	SUGT1P3	No	No	Yes	13	41482295	41495910	-1	pseudogene	283507	SUGT1P3	NA	NA	0	0	0	NA	NA	NA	NA	Yes	IMR90	3.864e-06	rs1072605	13
ENSG00000229473	RGS17P1	No	No	Yes	13	41566915	41567467	-1	pseudogene	100128628	RGS17P1	NA	NA	0	0	0	NA	NA	NA	NA	Yes	IMR90	3.864e-06	rs1072605	13
ENSG00000235012	AF121897.4	No	No	Yes	21	40897510	40901782	1	pseudogene	NA	NA	NA	NA	0	0	0	NA	NA	NA	NA	Yes	IMR90:Trophoblast-like_Cell	3.967e-06	rs112307230	19
ENSG00000184809	C21orf88	No	No	Yes	21	40969074	40984748	-1	protein_coding	114041	C21orf88	NA	NA	0	0	0	NA	NA	NA	NA	Yes	Mesenchymal_Stem_Cell	3.967e-06	rs112307230	19
ENSG00000171587	DSCAM	Yes	No	Yes	21	41382926	42219065	-1	protein_coding	1826	DSCAM	1	0.438963	66	10.47	0	NA	NA	NA	NA	Yes	Mesendoderm	3.967e-06	rs112307230	19
ENSG00000263973	MIR4760	No	No	Yes	21	41584279	41584358	-1	miRNA	100616148	MIR4760	NA	NA	0	0	0	NA	NA	NA	NA	Yes	IMR90:Mesendoderm:hESC	3.967e-06	rs112307230	19
ENSG00000235123	DSCAM-AS1	No	No	Yes	21	41755010	41757285	1	antisense	100506492	DSCAM-AS1	NA	NA	0	0	0	NA	NA	NA	NA	Yes	Left_Ventricle:IMR90:Mesenchymal_Stem_Cell:Mesendoderm:Trophoblast-like_Cell:hESC	3.967e-06	rs112307230	19
ENSG00000221396	AF064863.1	Yes	No	Yes	21	41949429	41949538	1	miRNA	NA	NA	NA	NA	24	8.123	0	NA	NA	NA	NA	Yes	IMR90:Mesendoderm:hESC	3.967e-06	rs112307230	19
ENSG00000233756	DSCAM-IT1	Yes	No	Yes	21	41987304	42002693	-1	sense_intronic	100874326	DSCAM-IT1	NA	NA	10	3.736	0	NA	NA	NA	NA	Yes	Mesendoderm:Trophoblast-like_Cell:hESC	3.967e-06	rs112307230	19
ENSG00000230859	YRDCP3	No	No	Yes	21	42235920	42236399	1	pseudogene	100861429	YRDCP3	NA	NA	0	0	0	NA	NA	NA	NA	Yes	Mesendoderm	3.967e-06	rs112307230	19
ENSG00000226496	LINC00323	No	No	Yes	21	42513427	42520060	-1	antisense	284835	LINC00323	NA	NA	0	0	0	NA	NA	NA	NA	Yes	Mesendoderm	3.967e-06	rs112307230	19
ENSG00000263681	MIR3197	No	No	Yes	21	42539484	42539556	1	miRNA	100423023	MIR3197	NA	NA	0	0	0	NA	NA	NA	NA	Yes	Mesendoderm	3.967e-06	rs112307230	19
ENSG00000182240	BACE2	No	No	Yes	21	42539728	42654445	1	protein_coding	25825	BACE2	0.952645	NA	0	0	0	NA	NA	NA	NA	Yes	Mesendoderm	3.967e-06	rs112307230	19
ENSG00000225745	PLAC4	No	No	Yes	21	42548249	42558715	-1	antisense	191585	PLAC4	NA	NA	0	0	0	NA	NA	NA	NA	Yes	Mesendoderm	3.967e-06	rs112307230	19
ENSG00000224388	BACE2-IT1	No	No	Yes	21	42552024	42552553	1	antisense	282569	BACE2-IT1	NA	NA	0	0	0	NA	NA	NA	NA	Yes	Mesendoderm	3.967e-06	rs112307230	19
ENSG00000183844	FAM3B	No	No	Yes	21	42676139	42729358	1	protein_coding	54097	FAM3B	1.17774e-06	NA	0	0	0	NA	NA	NA	NA	Yes	Mesenchymal_Stem_Cell	3.967e-06	rs112307230	19
ENSG00000165097	KDM1B	Yes	Yes	No	6	18155560	18224084	1	protein_coding	221656	KDM1B	0.815088	-0.609535	28	12.82	23	8.31199e-18	0	BIOSQTL/BIOS_eQTL_geneLevel:GTEx/v8/Brain_Cerebellum:GTEx/v8/Skin_Sun_Exposed_Lower_leg:GTEx/v8/Thyroid	-	No	NA	4.047e-06	rs6902848	5
ENSG00000089048	ESF1	No	No	Yes	20	13694969	13765532	-1	protein_coding	51575	ESF1	0.0844453	0.672584	0	0	0	NA	NA	NA	NA	Yes	IMR90:Mesenchymal_Stem_Cell:Mesendoderm	4.489e-06	rs6111234	17
ENSG00000101247	NDUFAF5	No	No	Yes	20	13765596	13799067	1	protein_coding	79133	NDUFAF5	1.00134e-05	0.790816	0	0	0	NA	NA	NA	NA	Yes	IMR90:Mesenchymal_Stem_Cell:Mesendoderm	4.489e-06	rs6111234	17
ENSG00000101251	SEL1L2	No	No	Yes	20	13829893	13977089	-1	protein_coding	80343	SEL1L2	2.69129e-11	0.386554	0	0	0	NA	NA	NA	NA	Yes	Mesenchymal_Stem_Cell	4.489e-06	rs6111234	17
ENSG00000221328	AL117333.1	No	No	Yes	20	13936410	13936503	-1	miRNA	NA	NA	NA	NA	0	0	0	NA	NA	NA	NA	Yes	Left_Ventricle:IMR90:Mesenchymal_Stem_Cell:Mesendoderm	4.489e-06	rs6111234	17
ENSG00000212247	RNU6-278P	No	No	Yes	20	13953962	13954070	-1	snRNA	106481767	RNU6-278P	NA	NA	0	0	0	NA	NA	NA	NA	Yes	Left_Ventricle:IMR90:Mesenchymal_Stem_Cell:Mesendoderm	4.489e-06	rs6111234	17
ENSG00000172264	MACROD2	No	No	Yes	20	13976015	16033842	1	protein_coding	140733	MACROD2	0.0113567	3.34669	0	0	0	NA	NA	NA	NA	Yes	Mesenchymal_Stem_Cell	4.489e-06	rs6111234	17
ENSG00000230935	RPS3P1	No	No	Yes	20	13984154	13984345	1	pseudogene	140754	RPS3P1	NA	NA	0	0	0	NA	NA	NA	NA	Yes	Mesenchymal_Stem_Cell	4.489e-06	rs6111234	17
ENSG00000234187	AIMP1P1	No	No	Yes	20	14108046	14108982	1	pseudogene	170547	AIMP1P1	NA	NA	0	0	0	NA	NA	NA	NA	Yes	IMR90:Mesenchymal_Stem_Cell:Mesendoderm:Neural_Progenitor_Cell	4.489e-06	rs6111234	17
ENSG00000239923	RN7SL864P	No	No	Yes	20	14203687	14203976	1	misc_RNA	106479536	RN7SL864P	NA	NA	0	0	0	NA	NA	NA	NA	Yes	Aorta:Left_Ventricle:IMR90:Mesenchymal_Stem_Cell:Mesendoderm:Trophoblast-like_Cell:hESC	4.489e-06	rs6111234	17
ENSG00000125848	FLRT3	No	No	Yes	20	14303634	14318262	-1	protein_coding	23767	FLRT3	0.988395	-0.403262	0	0	0	NA	NA	NA	NA	Yes	Aorta:Left_Ventricle:Liver:IMR90:Mesenchymal_Stem_Cell:Mesendoderm:Neural_Progenitor_Cell:Trophoblast-like_Cell	4.489e-06	rs6111234	17
ENSG00000199570	RNU6-228P	No	No	Yes	20	14332966	14333071	1	snRNA	106479668	RNU6-228P	NA	NA	0	0	0	NA	NA	NA	NA	Yes	Left_Ventricle:Right_Ventricle:IMR90:Mesenchymal_Stem_Cell:Mesendoderm	4.489e-06	rs6111234	17
ENSG00000227563	RNF11B	No	No	Yes	20	14527830	14528269	-1	pseudogene	170543	RNF11P2	NA	NA	0	0	0	NA	NA	NA	NA	Yes	Left_Ventricle:IMR90:Mesenchymal_Stem_Cell:Mesendoderm	4.489e-06	rs6111234	17
ENSG00000227927	MACROD2-IT1	No	No	Yes	20	14535030	14617170	1	sense_intronic	140848	MACROD2-IT1	NA	NA	0	0	0	NA	NA	NA	NA	Yes	Left_Ventricle:IMR90:Mesenchymal_Stem_Cell:Mesendoderm	4.489e-06	rs6111234	17
ENSG00000213950	RPS10P2	No	No	Yes	20	14738209	14738702	1	pseudogene	140758	RPS10P2	NA	NA	0	0	0	NA	NA	NA	NA	Yes	IMR90:Mesenchymal_Stem_Cell:Mesendoderm	4.489e-06	rs6111234	17
ENSG00000235914	MACROD2-AS1	No	No	Yes	20	14864899	14910161	-1	antisense	100379174	MACROD2-AS1	NA	NA	0	0	0	NA	NA	NA	NA	Yes	Left_Ventricle:IMR90:Mesenchymal_Stem_Cell:Mesendoderm	4.489e-06	rs6111234	17
ENSG00000237832	RP5-974N19.1	No	No	Yes	20	14914489	14916009	-1	antisense	NA	NA	NA	NA	0	0	0	NA	NA	NA	NA	Yes	Left_Ventricle:IMR90:Mesenchymal_Stem_Cell:Mesendoderm	4.489e-06	rs6111234	17
ENSG00000199803	RNU6-1159P	No	No	Yes	20	15002199	15002305	-1	snRNA	106481939	RNU6-1159P	NA	NA	0	0	0	NA	NA	NA	NA	Yes	Left_Ventricle:IMR90:Mesenchymal_Stem_Cell:Mesendoderm:hESC	4.489e-06	rs6111234	17
ENSG00000201180	RNU6-115P	No	No	Yes	20	15003498	15003604	1	snRNA	106479617	RNU6-115P	NA	NA	0	0	0	NA	NA	NA	NA	Yes	Left_Ventricle:IMR90:Mesenchymal_Stem_Cell:Mesendoderm:hESC	4.489e-06	rs6111234	17
ENSG00000222500	RNA5SP475	No	No	Yes	20	15261410	15261519	-1	rRNA	100873717	RNA5SP475	NA	NA	0	0	0	NA	NA	NA	NA	Yes	Left_Ventricle:IMR90:Mesenchymal_Stem_Cell:Mesendoderm:hESC	4.489e-06	rs6111234	17
ENSG00000225181	RP11-388K2.1	No	No	Yes	20	15532802	15533530	-1	antisense	NA	NA	NA	NA	0	0	0	NA	NA	NA	NA	Yes	IMR90:Mesenchymal_Stem_Cell:Mesendoderm:hESC	4.489e-06	rs6111234	17
ENSG00000212111	AL121584.1	No	No	Yes	20	15539025	15539113	-1	miRNA	NA	NA	NA	NA	0	0	0	NA	NA	NA	NA	Yes	IMR90:Mesenchymal_Stem_Cell:Mesendoderm:hESC	4.489e-06	rs6111234	17
ENSG00000224274	ENSAP1	No	No	Yes	20	15600139	15600464	-1	pseudogene	170511	ENSAP1	NA	NA	0	0	0	NA	NA	NA	NA	Yes	Left_Ventricle:IMR90:Mesenchymal_Stem_Cell:Mesendoderm:Neural_Progenitor_Cell:Trophoblast-like_Cell:hESC	4.489e-06	rs6111234	17
ENSG00000089177	KIF16B	No	Yes	Yes	20	16252749	16554078	-1	protein_coding	55614	KIF16B	4.35337e-13	0.161312	0	0	9	5.1399e-33	0	BIOSQTL/BIOS_eQTL_geneLevel:GTEx/v8/Whole_Blood:GTEx/v8/Cells_Cultured_fibroblasts	+	Yes	Mesenchymal_Stem_Cell:Mesendoderm:Trophoblast-like_Cell:hESC	4.489e-06	rs6111234	17
ENSG00000221448	AL118509.1	No	No	Yes	20	16390942	16391036	-1	miRNA	NA	NA	NA	NA	0	0	0	NA	NA	NA	NA	Yes	Left_Ventricle:IMR90:Mesenchymal_Stem_Cell:Mesendoderm:hESC	4.489e-06	rs6111234	17
ENSG00000200494	Y_RNA	Yes	No	No	20	16651286	16651387	-1	misc_RNA	NA	NA	NA	NA	14	7.019	0	NA	NA	NA	NA	No	NA	4.489e-06	rs6111234	17
ENSG00000228809	RP4-705D16.3	No	No	Yes	20	16695489	16711593	-1	antisense	NA	NA	NA	NA	0	0	0	NA	NA	NA	NA	Yes	Mesenchymal_Stem_Cell:Mesendoderm:hESC	4.489e-06	rs6111234	17
ENSG00000125870	SNRPB2	No	No	Yes	20	16710606	16722421	1	protein_coding	6629	SNRPB2	0.320265	0.10055	0	0	0	NA	NA	NA	NA	Yes	Mesenchymal_Stem_Cell:Mesendoderm:hESC	4.489e-06	rs6111234	17
ENSG00000125879	OTOR	No	No	Yes	20	16729003	16750707	1	protein_coding	56914	OTOR	0.0148213	0.50903	0	0	0	NA	NA	NA	NA	Yes	Left_Ventricle:Liver:IMR90:Mesenchymal_Stem_Cell:Mesendoderm:Trophoblast-like_Cell:hESC	4.489e-06	rs6111234	17
ENSG00000232241	DYNLT3P1	No	No	Yes	20	17459730	17460076	-1	pseudogene	170554	DYNLT3P1	NA	NA	0	0	0	NA	NA	NA	NA	Yes	IMR90:Mesenchymal_Stem_Cell:Mesendoderm	4.489e-06	rs6111234	17
ENSG00000125850	OVOL2	No	No	Yes	20	17937623	18039832	-1	protein_coding	58495	OVOL2	0.436097	-0.311451	0	0	0	NA	NA	NA	NA	Yes	IMR90	4.489e-06	rs6111234	17
ENSG00000229262	RP4-726N1.2	No	No	Yes	20	18040137	18051652	1	antisense	NA	NA	NA	NA	0	0	0	NA	NA	NA	NA	Yes	IMR90	4.489e-06	rs6111234	17
ENSG00000207282	Y_RNA	No	No	Yes	20	18094111	18094223	-1	misc_RNA	NA	NA	NA	NA	0	0	0	NA	NA	NA	NA	Yes	IMR90:Mesenchymal_Stem_Cell	4.489e-06	rs6111234	17
ENSG00000232838	PET117	No	No	Yes	20	18118517	18123813	1	protein_coding	100303755	PET117	NA	-0.342149	0	0	0	NA	NA	NA	NA	Yes	IMR90:Mesenchymal_Stem_Cell	4.489e-06	rs6111234	17
ENSG00000149474	CSRP2BP	No	No	Yes	20	18118762	18169031	1	protein_coding	57325	CSRP2BP	1.34917e-08	0.0789853	0	0	0	NA	NA	NA	NA	Yes	IMR90:Mesenchymal_Stem_Cell	4.489e-06	rs6111234	17
ENSG00000232943	RP4-717M23.2	No	No	Yes	20	18200757	18201156	1	pseudogene	NA	NA	NA	NA	0	0	0	NA	NA	NA	NA	Yes	IMR90	4.489e-06	rs6111234	17
ENSG00000266720	RN7SL14P	No	No	Yes	20	18239200	18239495	-1	misc_RNA	106480481	RN7SL14P	NA	NA	0	0	0	NA	NA	NA	NA	Yes	IMR90	4.489e-06	rs6111234	17
ENSG00000252635	RNU2-56P	No	No	Yes	20	18246334	18246523	-1	snRNA	106480221	RNU2-56P	NA	NA	0	0	0	NA	NA	NA	NA	Yes	IMR90	4.489e-06	rs6111234	17
ENSG00000125846	ZNF133	No	No	Yes	20	18269121	18297640	1	protein_coding	7692	ZNF133	0.94961	-0.387691	0	0	0	NA	NA	NA	NA	Yes	IMR90	4.489e-06	rs6111234	17
ENSG00000199719	RN7SKP74	No	No	Yes	20	18275787	18276095	-1	misc_RNA	106479127	RN7SKP74	NA	NA	0	0	0	NA	NA	NA	NA	Yes	IMR90	4.489e-06	rs6111234	17
ENSG00000232136	DUXAP7	No	No	Yes	20	18623426	18624278	-1	pseudogene	503636	DUXAP7	NA	NA	0	0	0	NA	NA	NA	NA	Yes	Left_Ventricle	4.489e-06	rs6111234	17
ENSG00000179447	RP5-1027G4.3	No	No	Yes	20	19222946	19265240	-1	antisense	100130264	LOC100130264	NA	NA	0	0	0	NA	NA	NA	NA	Yes	IMR90	4.489e-06	rs6111234	17
ENSG00000216017	AL139429.1	No	No	Yes	20	19570741	19570831	-1	miRNA	NA	NA	NA	NA	0	0	0	NA	NA	NA	NA	Yes	Mesenchymal_Stem_Cell	4.489e-06	rs6111234	17
ENSG00000089127	OAS1	No	No	Yes	12	113344582	113369990	1	protein_coding	4938	OAS1	0.00123924	-0.362759	0	0	0	NA	NA	NA	NA	Yes	Mesenchymal_Stem_Cell	5.159e-06	rs1001563	11
ENSG00000111335	OAS2	No	No	Yes	12	113416200	113449528	1	protein_coding	4939	OAS2	1.89092e-14	-0.406421	0	0	0	NA	NA	NA	NA	Yes	IMR90:Mesenchymal_Stem_Cell	5.159e-06	rs1001563	11
ENSG00000089116	LHX5	No	No	Yes	12	113899839	113910085	-1	protein_coding	64211	LHX5	0.695818	-0.61706	0	0	0	NA	NA	NA	NA	Yes	IMR90	5.159e-06	rs1001563	11
ENSG00000257935	RP11-82C23.2	No	No	Yes	12	113909808	113918429	1	antisense	NA	NA	NA	NA	0	0	0	NA	NA	NA	NA	Yes	IMR90	5.159e-06	rs1001563	11
ENSG00000135111	TBX3	No	No	Yes	12	115108059	115121969	-1	protein_coding	6926	TBX3	0.948925	0.669983	0	0	0	NA	NA	NA	NA	Yes	hESC	5.159e-06	rs1001563	11
ENSG00000257817	RP4-601P9.2	No	No	Yes	12	115151616	115205762	1	lincRNA	NA	NA	NA	NA	0	0	0	NA	NA	NA	NA	Yes	hESC	5.159e-06	rs1001563	11
ENSG00000257979	SNRPGP18	No	No	Yes	12	116606850	116607063	1	pseudogene	106480680	SNRPGP18	NA	NA	0	0	0	NA	NA	NA	NA	Yes	Mesendoderm	5.159e-06	rs1001563	11
ENSG00000258337	RP11-115H15.2	No	No	Yes	12	116612307	116619100	-1	sense_intronic	NA	NA	NA	NA	0	0	0	NA	NA	NA	NA	Yes	Mesendoderm	5.159e-06	rs1001563	11
ENSG00000258249	RP11-497G19.3	No	No	Yes	12	117037075	117041390	1	lincRNA	NA	NA	NA	NA	0	0	0	NA	NA	NA	NA	Yes	Left_Ventricle	5.159e-06	rs1001563	11
ENSG00000257883	RP11-497G19.1	No	No	Yes	12	117099387	117135870	1	lincRNA	NA	NA	NA	NA	0	0	0	NA	NA	NA	NA	Yes	Left_Ventricle:Mesenchymal_Stem_Cell	5.159e-06	rs1001563	11
ENSG00000135116	HRK	No	No	Yes	12	117293949	117319246	-1	protein_coding	8739	HRK	NA	0.578	0	0	0	NA	NA	NA	NA	Yes	IMR90:Mesenchymal_Stem_Cell:Trophoblast-like_Cell	5.159e-06	rs1001563	11
ENSG00000185736	ADARB2	Yes	No	Yes	10	1228073	1779670	-1	protein_coding	105	ADARB2	0.738169	2.59713	1	4.671	0	NA	NA	NA	NA	Yes	IMR90:Mesenchymal_Stem_Cell	6.098e-06	10:1513971	8
ENSG00000226694	RP11-69C17.2	No	No	Yes	10	2114039	2123291	1	lincRNA	NA	NA	NA	NA	0	0	0	NA	NA	NA	NA	Yes	hESC	6.098e-06	10:1513971	8
ENSG00000234170	RP11-446F3.2	No	No	Yes	10	2488447	2489546	-1	lincRNA	NA	NA	NA	NA	0	0	0	NA	NA	NA	NA	Yes	Mesenchymal_Stem_Cell	6.098e-06	10:1513971	8
ENSG00000264261	AC024908.1	No	No	Yes	10	2495329	2495418	-1	miRNA	NA	NA	NA	NA	0	0	0	NA	NA	NA	NA	Yes	Mesenchymal_Stem_Cell	6.098e-06	10:1513971	8
ENSG00000237500	RP11-526P5.1	No	No	Yes	10	2541913	2542762	1	lincRNA	NA	NA	NA	NA	0	0	0	NA	NA	NA	NA	Yes	IMR90:Mesendoderm:Trophoblast-like_Cell	6.098e-06	10:1513971	8
ENSG00000235281	RP11-526P5.2	No	No	Yes	10	2543975	2609431	1	lincRNA	NA	NA	NA	NA	0	0	0	NA	NA	NA	NA	Yes	IMR90:Mesendoderm:Trophoblast-like_Cell	6.098e-06	10:1513971	8
ENSG00000231743	RP11-89K18.1	No	No	Yes	10	2978213	2978633	1	pseudogene	NA	NA	NA	NA	0	0	0	NA	NA	NA	NA	Yes	IMR90:Mesenchymal_Stem_Cell:Mesendoderm:Trophoblast-like_Cell:hESC	6.098e-06	10:1513971	8
ENSG00000234182	RP11-118K6.2	No	No	Yes	10	3052723	3055303	1	lincRNA	NA	NA	NA	NA	0	0	0	NA	NA	NA	NA	Yes	IMR90:Mesenchymal_Stem_Cell:Mesendoderm:hESC	6.098e-06	10:1513971	8
ENSG00000273001	RP11-118K6.3	No	No	Yes	10	3107616	3108193	-1	lincRNA	NA	NA	NA	NA	0	0	0	NA	NA	NA	NA	Yes	Mesenchymal_Stem_Cell:Mesendoderm:hESC	6.098e-06	10:1513971	8
ENSG00000067057	PFKP	No	No	Yes	10	3108525	3179904	1	protein_coding	5214	PFKP	7.08343e-15	NA	0	0	0	NA	NA	NA	NA	Yes	Mesenchymal_Stem_Cell:Mesendoderm:hESC	6.098e-06	10:1513971	8
ENSG00000175455	CCDC14	No	No	Yes	3	123616152	123680564	-1	protein_coding	64770	CCDC14	3.40559e-07	0.113888	0	0	0	NA	NA	NA	NA	Yes	Left_Ventricle:IMR90:Mesenchymal_Stem_Cell:Mesendoderm:Trophoblast-like_Cell:hESC	6.491e-06	rs106520	1
ENSG00000065371	ROPN1	No	No	Yes	3	123687368	123711025	-1	protein_coding	54763	ROPN1	0.00818535	-0.715621	0	0	0	NA	NA	NA	NA	Yes	Left_Ventricle:IMR90:Mesenchymal_Stem_Cell:Mesendoderm:Trophoblast-like_Cell:hESC	6.491e-06	rs106520	1
ENSG00000238512	AC117401.1	No	No	Yes	3	123780841	123780931	-1	miRNA	NA	NA	NA	NA	0	0	0	NA	NA	NA	NA	Yes	IMR90:Mesenchymal_Stem_Cell:Mesendoderm:hESC	6.491e-06	rs106520	1
ENSG00000160145	KALRN	Yes	Yes	Yes	3	123798870	124445172	1	protein_coding	8997	KALRN	0.999997	-0.642918	2	15.69	2	2.0807e-62	0	DICE/T_CD4_naive:DICE/T_CD4_TFH:DICE/T_CD4_TH17:DICE/T_CD4_TH2:DICE/T_CD4_memory_TREG:BIOSQTL/BIOS_eQTL_geneLevel:GTEx/v8/Esophagus_Mucosa:GTEx/v8/Muscle_Skeletal:GTEx/v8/Pancreas:GTEx/v8/Stomach	+	Yes	IMR90:Mesenchymal_Stem_Cell:Mesendoderm:hESC	6.491e-06	rs106520	1
ENSG00000266383	MIR5002	No	No	Yes	3	123851776	123851872	1	miRNA	100847021	MIR5002	NA	NA	0	0	0	NA	NA	NA	NA	Yes	IMR90:Mesenchymal_Stem_Cell:Mesendoderm	6.491e-06	rs106520	1
ENSG00000240622	RPL7P15	No	No	Yes	3	123870807	123871910	-1	pseudogene	100270850	RPL7P15	NA	NA	0	0	0	NA	NA	NA	NA	Yes	IMR90:Mesenchymal_Stem_Cell:Mesendoderm	6.491e-06	rs106520	1
ENSG00000252751	RNU6-143P	No	No	Yes	3	124126538	124126630	1	snRNA	106479629	RNU6-143P	NA	NA	0	0	0	NA	NA	NA	NA	Yes	IMR90	6.491e-06	rs106520	1
ENSG00000263775	AC080008.1	No	No	Yes	3	124415785	124415883	-1	miRNA	NA	NA	NA	NA	0	0	0	NA	NA	NA	NA	Yes	Liver:IMR90:Mesenchymal_Stem_Cell:Mesendoderm:Trophoblast-like_Cell:hESC	6.491e-06	rs106520	1
ENSG00000260391	RP11-71H17.7	No	Yes	Yes	3	124442635	124445172	1	sense_overlapping	NA	NA	NA	NA	0	0	2	2.11074e-26	0	BIOSQTL/BIOS_eQTL_geneLevel	+	Yes	IMR90:Mesenchymal_Stem_Cell:Mesendoderm:Trophoblast-like_Cell	6.491e-06	rs106520	1
ENSG00000114491	UMPS	No	Yes	Yes	3	124449213	124464040	1	protein_coding	7372	UMPS	0.000109217	1.31277	0	0	2	3.55401e-08	8.31287e-34	BIOSQTL/BIOS_eQTL_geneLevel:GTEx/v8/Esophagus_Mucosa:GTEx/v8/Cells_Cultured_fibroblasts	-	Yes	IMR90:Mesenchymal_Stem_Cell:Mesendoderm:Trophoblast-like_Cell	6.491e-06	rs106520	1
ENSG00000265981	MIR544B	No	No	Yes	3	124451286	124451363	1	miRNA	100422864	MIR544B	NA	NA	0	0	0	NA	NA	NA	NA	Yes	IMR90:Mesenchymal_Stem_Cell:Mesendoderm:Trophoblast-like_Cell	6.491e-06	rs106520	1
ENSG00000242199	RP11-71H17.1	No	No	Yes	3	124452265	124452601	-1	pseudogene	NA	NA	NA	NA	0	0	0	NA	NA	NA	NA	Yes	IMR90:Mesenchymal_Stem_Cell:Mesendoderm:Trophoblast-like_Cell	6.491e-06	rs106520	1
ENSG00000272947	RP11-71H17.9	No	No	Yes	3	124467422	124468120	1	lincRNA	NA	NA	NA	NA	0	0	0	NA	NA	NA	NA	Yes	IMR90:Mesenchymal_Stem_Cell:Mesendoderm:Trophoblast-like_Cell	6.491e-06	rs106520	1
ENSG00000082781	ITGB5	No	Yes	Yes	3	124480795	124620265	-1	protein_coding	3693	ITGB5	0.000480019	1.25334	0	0	1	7.88275e-08	3.77642e-45	GTEx/v8/Artery_Tibial	-	Yes	IMR90:Mesenchymal_Stem_Cell	6.491e-06	rs106520	1
ENSG00000243986	ENO1P3	No	No	Yes	3	124580941	124582164	-1	pseudogene	100419069	ENO1P3	NA	NA	0	0	0	NA	NA	NA	NA	Yes	Left_Ventricle:Liver:IMR90:Mesenchymal_Stem_Cell:Trophoblast-like_Cell	6.491e-06	rs106520	1
ENSG00000238992	snoU13	No	No	Yes	3	125164905	125165007	1	snoRNA	NA	NA	NA	NA	0	0	0	NA	NA	NA	NA	Yes	IMR90:Mesenchymal_Stem_Cell	6.491e-06	rs106520	1
ENSG00000252965	Y_RNA	No	No	Yes	3	125247088	125247193	-1	misc_RNA	NA	NA	NA	NA	0	0	0	NA	NA	NA	NA	Yes	IMR90:Mesenchymal_Stem_Cell	6.491e-06	rs106520	1
ENSG00000144909	OSBPL11	No	No	Yes	3	125247702	125313934	-1	protein_coding	114885	OSBPL11	0.898599	-0.207786	0	0	0	NA	NA	NA	NA	Yes	Mesenchymal_Stem_Cell	6.491e-06	rs106520	1
ENSG00000243072	GS1-388B5.2	No	No	Yes	3	125398417	125398625	1	pseudogene	NA	NA	NA	NA	0	0	0	NA	NA	NA	NA	Yes	Mesenchymal_Stem_Cell	6.491e-06	rs106520	1
ENSG00000242001	GS1-388B5.1	No	No	Yes	3	125400149	125400297	1	pseudogene	NA	NA	NA	NA	0	0	0	NA	NA	NA	NA	Yes	Mesenchymal_Stem_Cell	6.491e-06	rs106520	1
ENSG00000089250	NOS1	Yes	Yes	Yes	12	117645947	117889975	-1	protein_coding	4842	NOS1	0.998695	-0.250592	8	8.172	8	1.89192e-82	1.18684e-72	GTEx/v8/Esophagus_Mucosa:GTEx/v8/Skin_Not_Sun_Exposed_Suprapubic:GTEx/v8/Skin_Sun_Exposed_Lower_leg:GTEx/v8/Vagina	-	Yes	Mesendoderm	6.79e-06	rs61536991	12
ENSG00000171435	KSR2	No	No	Yes	12	117890817	118406788	-1	protein_coding	283455	KSR2	0.999947	-0.119279	0	0	0	NA	NA	NA	NA	Yes	Mesenchymal_Stem_Cell:Mesendoderm	6.79e-06	rs61536991	12
ENSG00000255686	RP11-227B21.2	No	No	Yes	12	117890817	117894791	1	antisense	NA	NA	NA	NA	0	0	0	NA	NA	NA	NA	Yes	Mesendoderm	6.79e-06	rs61536991	12
ENSG00000256071	RP11-465L8.1	No	No	Yes	12	118327259	118328813	1	antisense	NA	NA	NA	NA	0	0	0	NA	NA	NA	NA	Yes	Mesenchymal_Stem_Cell:Mesendoderm	6.79e-06	rs61536991	12
ENSG00000176871	WSB2	No	No	Yes	12	118470712	118500235	-1	protein_coding	55884	WSB2	0.503215	-0.405006	0	0	0	NA	NA	NA	NA	Yes	Mesendoderm	6.79e-06	rs61536991	12
ENSG00000255618	RP11-357K6.1	No	No	Yes	12	119210837	119212942	-1	lincRNA	NA	NA	NA	NA	0	0	0	NA	NA	NA	NA	Yes	IMR90:Mesenchymal_Stem_Cell	6.79e-06	rs61536991	12
ENSG00000139767	SRRM4	No	No	Yes	12	119419300	119600856	1	protein_coding	84530	SRRM4	0.411748	-1.16275	0	0	0	NA	NA	NA	NA	Yes	IMR90:Mesenchymal_Stem_Cell	6.79e-06	rs61536991	12
ENSG00000244112	RN7SL508P	No	No	Yes	12	119431662	119431956	1	misc_RNA	106481061	RN7SL508P	NA	NA	0	0	0	NA	NA	NA	NA	Yes	IMR90:Mesenchymal_Stem_Cell	6.79e-06	rs61536991	12
ENSG00000256031	RP11-364C11.3	No	No	Yes	12	119438581	119439647	1	sense_intronic	NA	NA	NA	NA	0	0	0	NA	NA	NA	NA	Yes	IMR90:Mesenchymal_Stem_Cell	6.79e-06	rs61536991	12
ENSG00000257095	RP11-364C11.2	No	No	Yes	12	119468844	119554766	-1	antisense	NA	NA	NA	NA	0	0	0	NA	NA	NA	NA	Yes	IMR90	6.79e-06	rs61536991	12
ENSG00000256311	RP11-64B16.5	No	No	Yes	12	119663639	119696822	-1	antisense	NA	NA	NA	NA	0	0	0	NA	NA	NA	NA	Yes	Left_Ventricle:IMR90:Mesenchymal_Stem_Cell	6.79e-06	rs61536991	12
ENSG00000183273	CCDC60	No	No	Yes	12	119772517	119978852	1	protein_coding	160777	CCDC60	8.62068e-06	-0.32706	0	0	0	NA	NA	NA	NA	Yes	IMR90:Mesenchymal_Stem_Cell	6.79e-06	rs61536991	12
ENSG00000222647	AC002070.1	No	No	Yes	12	120018597	120018700	1	miRNA	NA	NA	NA	NA	0	0	0	NA	NA	NA	NA	Yes	IMR90:Mesenchymal_Stem_Cell:Trophoblast-like_Cell	6.79e-06	rs61536991	12
ENSG00000224982	TMEM233	No	No	Yes	12	120031264	120079363	1	protein_coding	387890	TMEM233	NA	-0.0689326	0	0	0	NA	NA	NA	NA	Yes	IMR90:Mesenchymal_Stem_Cell:Trophoblast-like_Cell	6.79e-06	rs61536991	12
ENSG00000252886	RN7SKP197	No	No	Yes	12	120068895	120069191	-1	misc_RNA	106480894	RN7SKP197	NA	NA	0	0	0	NA	NA	NA	NA	Yes	IMR90:Mesenchymal_Stem_Cell	6.79e-06	rs61536991	12
ENSG00000258413	RP11-665C16.6	No	No	Yes	14	55729485	55738793	-1	lincRNA	NA	NA	NA	NA	0	0	0	NA	NA	NA	NA	Yes	Left_Ventricle:Mesendoderm	7.436e-06	rs17091769	14
ENSG00000178974	FBXO34	No	No	Yes	14	55738021	55828636	1	protein_coding	55030	FBXO34	0.00459848	0.0534722	0	0	0	NA	NA	NA	NA	Yes	Left_Ventricle:Mesendoderm	7.436e-06	rs17091769	14
ENSG00000239686	RP11-665C16.1	No	No	Yes	14	55749014	55749361	-1	pseudogene	NA	NA	NA	NA	0	0	0	NA	NA	NA	NA	Yes	Left_Ventricle:Mesendoderm	7.436e-06	rs17091769	14
ENSG00000182521	TBPL2	No	No	Yes	14	55880259	55923444	-1	protein_coding	387332	TBPL2	4.93487e-08	1.00328	0	0	0	NA	NA	NA	NA	Yes	IMR90:Mesenchymal_Stem_Cell:Mesendoderm:hESC	7.436e-06	rs17091769	14
ENSG00000239199	RPL21P6	No	No	Yes	14	55880274	55880777	-1	pseudogene	652975	RPL21P6	NA	NA	0	0	0	NA	NA	NA	NA	Yes	IMR90:Mesenchymal_Stem_Cell:Mesendoderm:hESC	7.436e-06	rs17091769	14
ENSG00000186615	KTN1-AS1	No	No	Yes	14	55965996	56046828	-1	antisense	100129075	KTN1-AS1	NA	NA	0	0	0	NA	NA	NA	NA	Yes	IMR90:Mesenchymal_Stem_Cell:Mesendoderm:hESC	7.436e-06	rs17091769	14
ENSG00000213641	RPL7AP4	No	No	Yes	14	56010119	56010887	1	pseudogene	652985	RPL7AP4	NA	NA	0	0	0	NA	NA	NA	NA	Yes	IMR90:Mesenchymal_Stem_Cell:Mesendoderm:hESC	7.436e-06	rs17091769	14
ENSG00000271484	RP11-132J14.3	No	No	Yes	14	56013392	56014841	1	pseudogene	NA	NA	NA	NA	0	0	0	NA	NA	NA	NA	Yes	IMR90:Mesenchymal_Stem_Cell:Mesendoderm:hESC	7.436e-06	rs17091769	14
ENSG00000126777	KTN1	No	No	Yes	14	56025790	56168244	1	protein_coding	3895	KTN1	0.639773	NA	0	0	0	NA	NA	NA	NA	Yes	IMR90:Mesenchymal_Stem_Cell:Mesendoderm:hESC	7.436e-06	rs17091769	14
ENSG00000200742	Y_RNA	No	No	Yes	14	56118252	56118352	1	misc_RNA	NA	NA	NA	NA	0	0	0	NA	NA	NA	NA	Yes	Left_Ventricle:IMR90:Mesenchymal_Stem_Cell:Mesendoderm:hESC	7.436e-06	rs17091769	14
ENSG00000258784	RP11-813I20.2	No	No	Yes	14	56214926	56239921	1	lincRNA	NA	NA	NA	NA	0	0	0	NA	NA	NA	NA	Yes	Left_Ventricle:IMR90:Mesenchymal_Stem_Cell:Mesendoderm:hESC	7.436e-06	rs17091769	14
ENSG00000177350	RPL13AP3	No	No	Yes	14	56232895	56234435	1	pseudogene	645683	RPL13AP3	NA	NA	0	0	0	NA	NA	NA	NA	Yes	Left_Ventricle:IMR90:Mesenchymal_Stem_Cell:Mesendoderm:hESC	7.436e-06	rs17091769	14
ENSG00000258791	LINC00520	No	No	Yes	14	56247864	56263406	-1	processed_transcript	645687	LINC00520	NA	NA	0	0	0	NA	NA	NA	NA	Yes	IMR90:Mesenchymal_Stem_Cell:Mesendoderm:hESC	7.436e-06	rs17091769	14
ENSG00000070269	TMEM260	Yes	No	Yes	14	56955072	57117324	1	protein_coding	54916	TMEM260	5.88266e-12	-0.368845	109	16.57	0	NA	NA	NA	NA	Yes	Mesendoderm:hESC	7.436e-06	rs17091769	14
ENSG00000258803	RP11-624J12.1	No	No	Yes	14	56981049	57018027	1	lincRNA	101927690	LOC101927690	NA	NA	0	0	0	NA	NA	NA	NA	Yes	Aorta:Left_Ventricle:Spleen:IMR90:Mesenchymal_Stem_Cell:Mesendoderm:Trophoblast-like_Cell:hESC	7.436e-06	rs17091769	14
ENSG00000258428	RP11-1085N6.2	Yes	No	Yes	14	57099962	57115376	-1	antisense	NA	NA	NA	NA	53	8.013	0	NA	NA	NA	NA	Yes	Mesendoderm:hESC	7.436e-06	rs17091769	14
ENSG00000270163	RP11-1085N6.6	No	No	Yes	14	57266623	57267306	-1	lincRNA	NA	NA	NA	NA	0	0	0	NA	NA	NA	NA	Yes	IMR90:Mesendoderm:Neural_Progenitor_Cell:hESC	7.436e-06	rs17091769	14
ENSG00000165588	OTX2	No	No	Yes	14	57267425	57277197	-1	protein_coding	5015	OTX2	0.7446	-0.822575	0	0	0	NA	NA	NA	NA	Yes	IMR90:Mesendoderm:Neural_Progenitor_Cell:hESC	7.436e-06	rs17091769	14
ENSG00000248550	OTX2-AS1	No	No	Yes	14	57279901	57618895	1	antisense	100309464	OTX2-AS1	NA	NA	0	0	0	NA	NA	NA	NA	Yes	IMR90:Mesendoderm:Neural_Progenitor_Cell:Trophoblast-like_Cell:hESC	7.436e-06	rs17091769	14
ENSG00000258776	RP11-1085N6.5	No	No	Yes	14	57284288	57360428	-1	lincRNA	NA	NA	NA	NA	0	0	0	NA	NA	NA	NA	Yes	Left_Ventricle:Liver:IMR90:Mesenchymal_Stem_Cell:Mesendoderm:Neural_Progenitor_Cell:Trophoblast-like_Cell:hESC	7.436e-06	rs17091769	14
ENSG00000243801	RN7SL461P	No	No	Yes	14	57291092	57291374	-1	misc_RNA	106481844	RN7SL461P	NA	NA	0	0	0	NA	NA	NA	NA	Yes	IMR90:Mesendoderm:Neural_Progenitor_Cell:Trophoblast-like_Cell:hESC	7.436e-06	rs17091769	14
ENSG00000200818	RNU6-1204P	No	No	Yes	14	57291704	57291810	1	snRNA	106481560	RNU6-1204P	NA	NA	0	0	0	NA	NA	NA	NA	Yes	IMR90:Mesendoderm:Neural_Progenitor_Cell:Trophoblast-like_Cell:hESC	7.436e-06	rs17091769	14
ENSG00000243388	RPL3P3	No	No	Yes	14	57445127	57446339	1	pseudogene	645798	RPL3P3	NA	NA	0	0	0	NA	NA	NA	NA	Yes	Mesenchymal_Stem_Cell:Mesendoderm:Trophoblast-like_Cell:hESC	7.436e-06	rs17091769	14
ENSG00000258758	RP11-613G13.1	No	No	Yes	14	57507603	57509222	1	pseudogene	NA	NA	NA	NA	0	0	0	NA	NA	NA	NA	Yes	Mesendoderm:Neural_Progenitor_Cell:Trophoblast-like_Cell:hESC	7.436e-06	rs17091769	14
ENSG00000259136	RP11-108M12.2	No	No	Yes	14	57511364	57511678	-1	pseudogene	NA	NA	NA	NA	0	0	0	NA	NA	NA	NA	Yes	Mesendoderm:Neural_Progenitor_Cell:Trophoblast-like_Cell:hESC	7.436e-06	rs17091769	14
ENSG00000258592	RP11-108M12.3	No	No	Yes	14	57532978	57579378	-1	lincRNA	NA	NA	NA	NA	0	0	0	NA	NA	NA	NA	Yes	Left_Ventricle:IMR90:Mesenchymal_Stem_Cell:Mesendoderm:Neural_Progenitor_Cell:hESC	7.436e-06	rs17091769	14
ENSG00000070367	EXOC5	No	No	Yes	14	57670518	57735726	-1	protein_coding	10640	EXOC5	0.996683	-1.28206	0	0	0	NA	NA	NA	NA	Yes	Aorta:Left_Ventricle:Liver:GM12878:IMR90:Mesenchymal_Stem_Cell:Mesendoderm:Neural_Progenitor_Cell:Trophoblast-like_Cell:hESC	7.436e-06	rs17091769	14
ENSG00000212928	AL391152.1	No	No	Yes	14	57671888	57673291	1	protein_coding	NA	NA	NA	NA	0	0	0	NA	NA	NA	NA	Yes	Left_Ventricle:Liver:Pancreas:Right_Ventricle:GM12878:IMR90:Mesenchymal_Stem_Cell:Mesendoderm:Neural_Progenitor_Cell:Trophoblast-like_Cell:hESC	7.436e-06	rs17091769	14
ENSG00000053770	AP5M1	No	No	Yes	14	57735627	57756797	1	protein_coding	55745	AP5M1	0.000108637	-0.588213	0	0	0	NA	NA	NA	NA	Yes	Aorta:Left_Ventricle:Liver:GM12878:IMR90:Mesenchymal_Stem_Cell:Mesendoderm:Neural_Progenitor_Cell:Trophoblast-like_Cell:hESC	7.436e-06	rs17091769	14
ENSG00000259008	RP11-932A10.1	No	No	Yes	14	57822164	57826128	1	lincRNA	NA	NA	NA	NA	0	0	0	NA	NA	NA	NA	Yes	Left_Ventricle:IMR90:Mesenchymal_Stem_Cell:Mesendoderm:hESC	7.436e-06	rs17091769	14
ENSG00000139977	NAA30	No	No	Yes	14	57857262	57882635	1	protein_coding	122830	NAA30	0.973715	-1.68299	0	0	0	NA	NA	NA	NA	Yes	Left_Ventricle:Liver:GM12878:IMR90:Mesenchymal_Stem_Cell:Mesendoderm:Trophoblast-like_Cell:hESC	7.436e-06	rs17091769	14
ENSG00000151812	SLC35F4	No	No	Yes	14	58030640	58448912	-1	protein_coding	341880	SLC35F4	0.00969257	NA	0	0	0	NA	NA	NA	NA	Yes	IMR90:Mesenchymal_Stem_Cell	7.436e-06	rs17091769	14
ENSG00000259969	RP11-999E24.3	No	No	Yes	14	58460263	58461243	-1	sense_overlapping	NA	NA	NA	NA	0	0	0	NA	NA	NA	NA	Yes	IMR90:Mesenchymal_Stem_Cell	7.436e-06	rs17091769	14
ENSG00000258836	RP11-349A22.2	No	No	Yes	14	58567703	58568292	1	pseudogene	NA	NA	NA	NA	0	0	0	NA	NA	NA	NA	Yes	IMR90:Mesenchymal_Stem_Cell	7.436e-06	rs17091769	14
ENSG00000243700	RN7SL598P	No	No	Yes	14	58646489	58646779	1	misc_RNA	106481759	RN7SL598P	NA	NA	0	0	0	NA	NA	NA	NA	Yes	Left_Ventricle:IMR90:Mesenchymal_Stem_Cell	7.436e-06	rs17091769	14
ENSG00000258519	RP11-349A22.3	No	No	Yes	14	58651294	58652225	1	pseudogene	NA	NA	NA	NA	0	0	0	NA	NA	NA	NA	Yes	Left_Ventricle:IMR90:Mesenchymal_Stem_Cell	7.436e-06	rs17091769	14
ENSG00000131966	ACTR10	No	No	Yes	14	58666798	58701750	1	protein_coding	55860	ACTR10	0.00473624	NA	0	0	0	NA	NA	NA	NA	Yes	Left_Ventricle:IMR90:Mesenchymal_Stem_Cell	7.436e-06	rs17091769	14
ENSG00000251401	RP11-11N6.1	No	No	Yes	4	91604147	91604274	1	pseudogene	NA	NA	NA	NA	0	0	0	NA	NA	NA	NA	Yes	Mesenchymal_Stem_Cell:Mesendoderm	7.911e-06	rs17020797	3
ENSG00000187653	TMSB4XP8	No	No	Yes	4	91759652	91760263	-1	pseudogene	7117	TMSB4XP8	NA	NA	0	0	0	NA	NA	NA	NA	Yes	Mesenchymal_Stem_Cell	7.911e-06	rs17020797	3
ENSG00000248984	AC004054.1	No	No	Yes	4	92029174	92033941	-1	antisense	NA	NA	NA	NA	0	0	0	NA	NA	NA	NA	Yes	Mesenchymal_Stem_Cell:hESC	7.911e-06	rs17020797	3
ENSG00000249049	RP11-763F8.1	No	No	Yes	4	92240185	92246457	-1	protein_coding	NA	NA	NA	NA	0	0	0	NA	NA	NA	NA	Yes	Left_Ventricle:Mesenchymal_Stem_Cell:hESC	7.911e-06	rs17020797	3
ENSG00000256889	AC093847.1	No	No	Yes	4	92949929	92950119	1	pseudogene	NA	NA	NA	NA	0	0	0	NA	NA	NA	NA	Yes	Mesenchymal_Stem_Cell	7.911e-06	rs17020797	3
ENSG00000248817	RP11-562F9.1	No	No	Yes	4	93103628	93105203	-1	pseudogene	NA	NA	NA	NA	0	0	0	NA	NA	NA	NA	Yes	Mesenchymal_Stem_Cell	7.911e-06	rs17020797	3
ENSG00000249152	RP11-562F9.2	No	No	Yes	4	93189918	93198226	-1	lincRNA	NA	NA	NA	NA	0	0	0	NA	NA	NA	NA	Yes	Liver:Mesenchymal_Stem_Cell:Mesendoderm	7.911e-06	rs17020797	3
ENSG00000248511	RP11-9B6.1	No	No	Yes	4	93218402	93225329	-1	protein_coding	NA	NA	NA	NA	0	0	0	NA	NA	NA	NA	Yes	Mesenchymal_Stem_Cell:Mesendoderm	7.911e-06	rs17020797	3
ENSG00000152208	GRID2	Yes	No	Yes	4	93225550	94695707	1	protein_coding	2895	GRID2	0.999998	-0.760168	45	11.84	0	NA	NA	NA	NA	Yes	Mesenchymal_Stem_Cell:Mesendoderm	7.911e-06	rs17020797	3
ENSG00000249239	RP11-428L21.2	No	No	Yes	4	93743137	93744069	-1	pseudogene	NA	NA	NA	NA	0	0	0	NA	NA	NA	NA	Yes	IMR90	7.911e-06	rs17020797	3
ENSG00000248627	RP11-428L21.1	No	No	Yes	4	93754836	93759993	-1	antisense	NA	NA	NA	NA	0	0	0	NA	NA	NA	NA	Yes	IMR90:Mesenchymal_Stem_Cell	7.911e-06	rs17020797	3
ENSG00000250908	RP11-703C10.1	No	No	Yes	4	94239774	94240937	-1	antisense	NA	NA	NA	NA	0	0	0	NA	NA	NA	NA	Yes	Left_Ventricle:IMR90:Mesenchymal_Stem_Cell:Mesendoderm:hESC	7.911e-06	rs17020797	3
ENSG00000202395	RN7SKP1	No	No	Yes	13	37740489	37740795	-1	misc_RNA	100873845	RN7SKP1	NA	NA	0	0	0	NA	NA	NA	NA	Yes	Left_Ventricle	8.252e-06	rs1072605	13
ENSG00000231490	RPL7L1P2	No	No	Yes	7	51327126	51327864	-1	pseudogene	100420155	RPL7L1P2	NA	NA	0	0	0	NA	NA	NA	NA	Yes	Mesendoderm:Trophoblast-like_Cell	8.646e-06	rs5884297	6
ENSG00000242650	RN7SL292P	No	No	Yes	7	51784354	51784615	1	misc_RNA	106481002	RN7SL292P	NA	NA	0	0	0	NA	NA	NA	NA	Yes	Liver:IMR90:Mesenchymal_Stem_Cell:Mesendoderm:hESC	8.646e-06	rs5884297	6
ENSG00000253028	SNORA31	No	No	Yes	7	52337133	52337265	-1	snoRNA	677814	SNORA31	NA	NA	0	0	0	NA	NA	NA	NA	Yes	Mesenchymal_Stem_Cell:hESC	8.646e-06	rs5884297	6
ENSG00000234304	RP11-398K14.1	No	No	Yes	7	52959530	52965500	-1	pseudogene	NA	NA	NA	NA	0	0	0	NA	NA	NA	NA	Yes	Mesenchymal_Stem_Cell:Mesendoderm:Trophoblast-like_Cell:hESC	8.646e-06	rs5884297	6
ENSG00000221900	POM121L12	No	No	Yes	7	53103349	53104617	1	protein_coding	285877	POM121L12	8.97051e-05	0.567571	0	0	0	NA	NA	NA	NA	Yes	Left_Ventricle:Liver:Mesenchymal_Stem_Cell:Mesendoderm:hESC	8.646e-06	rs5884297	6
ENSG00000271194	RP11-476O21.1	No	No	Yes	7	53383842	53384433	1	pseudogene	NA	NA	NA	NA	0	0	0	NA	NA	NA	NA	Yes	Mesenchymal_Stem_Cell:Mesendoderm:Trophoblast-like_Cell:hESC	8.646e-06	rs5884297	6
ENSG00000199629	RNU1-14P	No	No	Yes	7	53433751	53433902	1	snRNA	26859	RNU1-14P	NA	NA	0	0	0	NA	NA	NA	NA	Yes	Left_Ventricle:Mesenchymal_Stem_Cell:Mesendoderm:Trophoblast-like_Cell:hESC	8.646e-06	rs5884297	6
ENSG00000222154	RN7SKP218	No	No	Yes	7	53557841	53558132	-1	misc_RNA	106480900	RN7SKP218	NA	NA	0	0	0	NA	NA	NA	NA	Yes	Mesendoderm:hESC	8.646e-06	rs5884297	6
ENSG00000228627	GS1-278J22.2	No	No	Yes	7	53626907	53635942	-1	lincRNA	105375283	GS1-278J22.2	NA	NA	0	0	0	NA	NA	NA	NA	Yes	Mesendoderm:hESC	8.646e-06	rs5884297	6
ENSG00000205628	GS1-179L18.1	No	No	Yes	7	53723202	53879624	-1	lincRNA	401337	LINC01446	NA	NA	0	0	0	NA	NA	NA	NA	Yes	Mesendoderm:hESC	8.646e-06	rs5884297	6
ENSG00000222355	RNU2-29P	No	No	Yes	7	53843829	53844017	1	snRNA	106480209	RNU2-29P	NA	NA	0	0	0	NA	NA	NA	NA	Yes	Mesendoderm:hESC	8.646e-06	rs5884297	6
ENSG00000271306	RP11-678B3.3	No	No	Yes	7	53847476	53847956	1	pseudogene	NA	NA	NA	NA	0	0	0	NA	NA	NA	NA	Yes	Mesendoderm:hESC	8.646e-06	rs5884297	6
ENSG00000232418	RP11-678B3.1	No	No	Yes	7	53854860	53854991	1	pseudogene	NA	NA	NA	NA	0	0	0	NA	NA	NA	NA	Yes	Mesendoderm:hESC	8.646e-06	rs5884297	6
ENSG00000235454	RP11-678B3.2	No	No	Yes	7	53929926	53931032	1	pseudogene	NA	NA	NA	NA	0	0	0	NA	NA	NA	NA	Yes	Mesendoderm:hESC	8.646e-06	rs5884297	6
ENSG00000238131	RP11-806J6.1	No	No	Yes	7	53994369	54015437	-1	lincRNA	NA	NA	NA	NA	0	0	0	NA	NA	NA	NA	Yes	Liver:IMR90:Mesenchymal_Stem_Cell:Mesendoderm:hESC	8.646e-06	rs5884297	6
ENSG00000238354	snoU13	No	No	Yes	7	54427585	54427688	1	snoRNA	NA	NA	NA	NA	0	0	0	NA	NA	NA	NA	Yes	IMR90:Mesendoderm:Trophoblast-like_Cell:hESC	8.646e-06	rs5884297	6
ENSG00000213673	SLC25A5P3	No	No	Yes	7	54487137	54488021	1	pseudogene	222005	SLC25A5P3	NA	NA	0	0	0	NA	NA	NA	NA	Yes	Mesendoderm:hESC	8.646e-06	rs5884297	6
ENSG00000170419	VSTM2A	No	No	Yes	7	54610018	54638773	1	protein_coding	222008	VSTM2A	0.107353	0.123299	0	0	0	NA	NA	NA	NA	Yes	Left_Ventricle:IMR90:Mesenchymal_Stem_Cell:Mesendoderm:Trophoblast-like_Cell:hESC	8.646e-06	rs5884297	6
ENSG00000224223	GS1-18A18.1	No	No	Yes	7	54624663	54639419	1	sense_overlapping	285878	VSTM2A-OT1	NA	NA	0	0	0	NA	NA	NA	NA	Yes	Left_Ventricle:IMR90:Mesenchymal_Stem_Cell:Mesendoderm:Trophoblast-like_Cell:hESC	8.646e-06	rs5884297	6
ENSG00000228735	GS1-18A18.2	No	No	Yes	7	54643745	54646487	-1	lincRNA	NA	NA	NA	NA	0	0	0	NA	NA	NA	NA	Yes	Liver:IMR90:Mesenchymal_Stem_Cell:Mesendoderm:Trophoblast-like_Cell:hESC	8.646e-06	rs5884297	6
ENSG00000200471	RNU6-1125P	No	No	Yes	7	54688718	54688824	1	snRNA	106480061	RNU6-1125P	NA	NA	0	0	0	NA	NA	NA	NA	Yes	Mesendoderm:Trophoblast-like_Cell:hESC	8.646e-06	rs5884297	6
ENSG00000232612	RPL31P35	No	No	Yes	7	54724051	54724427	1	pseudogene	100271199	RPL31P35	NA	NA	0	0	0	NA	NA	NA	NA	Yes	Mesendoderm:Neural_Progenitor_Cell:Trophoblast-like_Cell:hESC	8.646e-06	rs5884297	6
ENSG00000132432	SEC61G	No	No	Yes	7	54819943	54827667	-1	protein_coding	23480	SEC61G	0.611529	-0.0796813	0	0	0	NA	NA	NA	NA	Yes	Mesendoderm	8.646e-06	rs5884297	6
ENSG00000234707	RP11-745C15.2	No	No	Yes	7	54827118	54872621	1	antisense	NA	NA	NA	NA	0	0	0	NA	NA	NA	NA	Yes	Mesendoderm	8.646e-06	rs5884297	6
ENSG00000178950	GAK	No	Yes	No	4	843064	926161	-1	protein_coding	2580	GAK	0.973135	-0.566431	0	0	6	2.215e-05	1.11798e-14	GTEx/v8/Esophagus_Gastroesophageal_Junction:GTEx/v8/Pituitary	+	No	NA	9.013e-06	rs11247975	2
ENSG00000145214	DGKQ	No	Yes	No	4	952675	980683	-1	protein_coding	1609	DGKQ	0.00119402	1.05869	0	0	18	2.1401e-09	6.00925e-06	BIOSQTL/BIOS_eQTL_geneLevel	+	No	NA	9.013e-06	rs11247975	2
ENSG00000127415	IDUA	No	Yes	No	4	980785	998316	1	protein_coding	3425	IDUA	2.64182e-08	NA	0	0	19	4.15345e-08	4.54804e-05	BIOSQTL/BIOS_eQTL_geneLevel	+	No	NA	9.013e-06	rs11247975	2
ENSG00000127418	FGFRL1	No	Yes	Yes	4	1003724	1020685	1	protein_coding	53834	FGFRL1	0.582187	0.211896	0	0	23	3.55273e-07	2.99657e-11	BIOSQTL/BIOS_eQTL_geneLevel:GTEx/v8/Skin_Not_Sun_Exposed_Suprapubic	-	Yes	Promoter_anchored_loops:EP_correlation_organ_oneway	9.013e-06	rs11247975	2
ENSG00000178222	RNF212	Yes	Yes	Yes	4	1050038	1107350	-1	protein_coding	285498	RNF212	0.125226	NA	8	14.49	27	6.81554e-32	0	DICE/B_cell_naive:DICE/T_CD4_naive:DICE/T_CD4_naive_activated:DICE/T_CD8_naive:DICE/T_CD8_naive_activated:DICE/NK:DICE/T_CD4_TFH:DICE/T_CD4_TH1:DICE/T_CD4_TH17:DICE/T_CD4_TH1_17:DICE/T_CD4_TH2:DICE/T_CD4_naive_TREG:BIOSQTL/BIOS_eQTL_geneLevel:GTEx/v8/Adipose_Subcutaneous:GTEx/v8/Adipose_Visceral_Omentum:GTEx/v8/Adrenal_Gland:GTEx/v8/Whole_Blood:GTEx/v8/Artery_Aorta:GTEx/v8/Artery_Coronary:GTEx/v8…	-	Yes	Spleen:IMR90:Mesenchymal_Stem_Cell	9.013e-06	rs11247975	2
ENSG00000251639	RP11-20I20.1	Yes	Yes	Yes	4	1093804	1095346	-1	pseudogene	NA	NA	NA	NA	1	0.554	23	3.98778e-07	2.17976e-09	DICE/T_CD4_memory_TREG:BIOSQTL/BIOS_eQTL_geneLevel:GTEx/v8/Heart_Atrial_Appendage:GTEx/v8/Lung:GTEx/v8/Nerve_Tibial:GTEx/v8/Testis	+	Yes	Promoter_anchored_loops:Spleen:IMR90:Mesenchymal_Stem_Cell	9.013e-06	rs11247975	2
ENSG00000251652	RP11-20I20.2	Yes	No	Yes	4	1107427	1126765	1	antisense	105374344	LOC105374344	NA	NA	9	14.49	0	NA	NA	NA	NA	Yes	Spleen:IMR90:Mesenchymal_Stem_Cell	9.013e-06	rs11247975	2
ENSG00000215367	TMED11P	Yes	Yes	Yes	4	1108985	1147514	-1	pseudogene	100379220	TMED11P	NA	NA	18	14.49	19	1.00266e-05	0.00691662	BIOSQTL/BIOS_eQTL_geneLevel	-	Yes	EP_correlation_organ_oneway:IMR90:Mesenchymal_Stem_Cell	9.013e-06	rs11247975	2
ENSG00000212458	SNORA48	Yes	No	Yes	4	1112672	1112801	1	snoRNA	652965	SNORA48	NA	NA	4	14.49	0	NA	NA	NA	NA	Yes	Spleen:IMR90:Mesenchymal_Stem_Cell	9.013e-06	rs11247975	2
ENSG00000227189	AC092535.3	Yes	Yes	Yes	4	1145160	1147489	1	antisense	NA	NA	NA	NA	10	14.07	26	1.16229e-06	0.00241117	DICE/B_cell_naive:BIOSQTL/BIOS_eQTL_geneLevel:GTEx/v8/Ovary:GTEx/v8/Cells_Cultured_fibroblasts:GTEx/v8/Skin_Not_Sun_Exposed_Suprapubic	-	Yes	IMR90:Mesenchymal_Stem_Cell	9.013e-06	rs11247975	2
ENSG00000159674	SPON2	Yes	Yes	Yes	4	1160720	1202750	-1	protein_coding	10417	SPON2	1.08812e-06	NA	5	18.65	22	8.06209e-15	0	BIOSQTL/BIOS_eQTL_geneLevel:GTEx/v8/Brain_Cerebellum:GTEx/v8/Nerve_Tibial:GTEx/v8/Spleen	+	Yes	Promoter_anchored_loops:IMR90	9.013e-06	rs11247975	2
ENSG00000273179	RP11-20I20.4	Yes	Yes	Yes	4	1161566	1161962	1	antisense	NA	NA	NA	NA	4	18.65	26	2.81471e-21	3.59818e-16	DICE/NK:GTEx/v8/Adipose_Subcutaneous:GTEx/v8/Adipose_Visceral_Omentum:GTEx/v8/Whole_Blood:GTEx/v8/Artery_Aorta:GTEx/v8/Artery_Tibial:GTEx/v8/Brain_Cerebellar_Hemisphere:GTEx/v8/Brain_Cerebellum:GTEx/v8/Brain_Nucleus_accumbens_basal_ganglia:GTEx/v8/Breast_Mammary_Tissue:GTEx/v8/Colon_Sigmoid:GTEx/v8/Colon_Transverse:GTEx/v8/Esophagus_Gastroesophageal_Junction:GTEx/v8/Esophagus_Mucosa:GTEx/v8/Esoph…	+	Yes	IMR90	9.013e-06	rs11247975	2
ENSG00000159692	CTBP1	No	Yes	Yes	4	1205236	1243741	-1	protein_coding	1487	CTBP1	0.979764	NA	0	0	27	3.40388e-17	0	BIOSQTL/BIOS_eQTL_geneLevel:GTEx/v8/Skin_Not_Sun_Exposed_Suprapubic:GTEx/v8/Skin_Sun_Exposed_Lower_leg:GTEx/v8/Testis	-	Yes	Promoter_anchored_loops:GM12878:IMR90:Mesenchymal_Stem_Cell	9.013e-06	rs11247975	2
ENSG00000196810	CTBP1-AS2	No	Yes	Yes	4	1243088	1282079	1	antisense	92070	CTBP1-AS2	NA	NA	0	0	26	3.40388e-17	0	BIOSQTL/BIOS_eQTL_geneLevel:GTEx/v8/Adipose_Visceral_Omentum:GTEx/v8/Skin_Sun_Exposed_Lower_leg	+	Yes	Promoter_anchored_loops:GM12878:IMR90:Mesenchymal_Stem_Cell	9.013e-06	rs11247975	2
ENSG00000090316	MAEA	No	Yes	Yes	4	1283639	1333935	1	protein_coding	10296	MAEA	0.844858	-1.28756	0	0	15	3.34778e-11	0	DICE/T_CD4_TFH:BIOSQTL/BIOS_eQTL_geneLevel:GTEx/v8/Adipose_Subcutaneous:GTEx/v8/Adipose_Visceral_Omentum:GTEx/v8/Whole_Blood:GTEx/v8/Breast_Mammary_Tissue:GTEx/v8/Esophagus_Muscularis:GTEx/v8/Lung:GTEx/v8/Nerve_Tibial:GTEx/v8/Skin_Not_Sun_Exposed_Suprapubic:GTEx/v8/Testis:GTEx/v8/Thyroid	-	Yes	EP_correlation_cell_type_oneway:IMR90:Mesenchymal_Stem_Cell	9.013e-06	rs11247975	2
ENSG00000163945	UVSSA	No	Yes	Yes	4	1341054	1381837	1	protein_coding	57654	UVSSA	8.88754e-14	0.251081	0	0	25	6.93338e-18	0	BIOSQTL/BIOS_eQTL_geneLevel:GTEx/v8/Adipose_Subcutaneous:GTEx/v8/Adipose_Visceral_Omentum:GTEx/v8/Whole_Blood:GTEx/v8/Artery_Aorta:GTEx/v8/Artery_Coronary:GTEx/v8/Artery_Tibial:GTEx/v8/Breast_Mammary_Tissue:GTEx/v8/Colon_Sigmoid:GTEx/v8/Colon_Transverse:GTEx/v8/Esophagus_Gastroesophageal_Junction:GTEx/v8/Esophagus_Muscularis:GTEx/v8/Heart_Atrial_Appendage:GTEx/v8/Heart_Left_Ventricle:GTEx/v8/Lung…	+	Yes	Promoter_anchored_loops:EP_correlation_cell_type_oneway:Adult_Cortex:Fetal_Cortex:Spleen:IMR90:Mesenchymal_Stem_Cell:Trophoblast-like_Cell	9.013e-06	rs11247975	2
ENSG00000179979	CRIPAK	No	Yes	No	4	1385340	1389780	1	protein_coding	285464	CRIPAK	2.43127e-12	1.57028	0	0	27	3.27083e-43	0	BIOSQTL/BIOS_eQTL_geneLevel:GTEx/v8/Adipose_Subcutaneous:GTEx/v8/Adipose_Visceral_Omentum:GTEx/v8/Adrenal_Gland:GTEx/v8/Cells_EBV-transformed_lymphocytes:GTEx/v8/Whole_Blood:GTEx/v8/Artery_Aorta:GTEx/v8/Artery_Coronary:GTEx/v8/Artery_Tibial:GTEx/v8/Brain_Anterior_cingulate_cortex_BA24:GTEx/v8/Brain_Caudate_basal_ganglia:GTEx/v8/Brain_Cerebellar_Hemisphere:GTEx/v8/Brain_Cerebellum:GTEx/v8/Brain_Co…	+	No	NA	9.013e-06	rs11247975	2
ENSG00000254094	AC078852.1	No	No	Yes	4	1350369	1351863	1	sense_intronic	NA	NA	NA	NA	0	0	0	NA	NA	NA	NA	Yes	Spleen:IMR90:Mesenchymal_Stem_Cell:Trophoblast-like_Cell	1.217e-05	rs11247975	2
ENSG00000253399	AC078852.2	No	No	Yes	4	1352267	1353249	1	sense_intronic	NA	NA	NA	NA	0	0	0	NA	NA	NA	NA	Yes	Spleen:IMR90:Mesenchymal_Stem_Cell:Trophoblast-like_Cell	1.217e-05	rs11247975	2
ENSG00000272783	RP13-1016M1.2	No	No	Yes	4	1552011	1552299	1	lincRNA	NA	NA	NA	NA	0	0	0	NA	NA	NA	NA	Yes	Promoter_anchored_loops	1.217e-05	rs11247975	2
ENSG00000068078	FGFR3	No	No	Yes	4	1795034	1810599	1	protein_coding	2261	FGFR3	0.00290912	-0.268744	0	0	0	NA	NA	NA	NA	Yes	Promoter_anchored_loops	1.217e-05	rs11247975	2
ENSG00000270372	RP11-109M17.2	No	No	Yes	9	10948372	10948481	-1	lincRNA	NA	NA	NA	NA	0	0	0	NA	NA	NA	NA	Yes	Left_Ventricle:Mesenchymal_Stem_Cell:Mesendoderm:Neural_Progenitor_Cell:Trophoblast-like_Cell:hESC	1.413e-05	rs10809696	7
ENSG00000230365	RP11-23D5.1	No	No	Yes	9	11275314	11276314	-1	lincRNA	NA	NA	NA	NA	0	0	0	NA	NA	NA	NA	Yes	Mesenchymal_Stem_Cell:Mesendoderm:hESC	1.413e-05	rs10809696	7
ENSG00000250259	RP11-460I19.2	No	No	Yes	4	1021466	1022760	1	lincRNA	NA	NA	NA	NA	0	0	0	NA	NA	NA	NA	Yes	Promoter_anchored_loops	1.84e-05	rs11247975	2
ENSG00000235608	NKX1-1	No	No	Yes	4	1396720	1400119	-1	protein_coding	54729	NKX1-1	0.18842	NA	0	0	0	NA	NA	NA	NA	Yes	Promoter_anchored_loops:IMR90	1.84e-05	rs11247975	2
ENSG00000065534	MYLK	No	No	Yes	3	123328896	123603178	-1	protein_coding	4638	MYLK	9.3792e-06	0.303166	0	0	0	NA	NA	NA	NA	Yes	IMR90:Mesenchymal_Stem_Cell	2.358e-05	rs106520	1
ENSG00000173702	MUC13	No	No	Yes	3	124624289	124672663	-1	protein_coding	56667	MUC13	0.0251339	NA	0	0	0	NA	NA	NA	NA	Yes	IMR90:Mesenchymal_Stem_Cell	2.358e-05	rs106520	1
ENSG00000163848	ZNF148	No	No	Yes	3	124944405	125094198	-1	protein_coding	7707	ZNF148	0.932275	-3.31202	0	0	0	NA	NA	NA	NA	Yes	Mesenchymal_Stem_Cell	2.358e-05	rs106520	1
ENSG00000252953	RNU6-232P	No	No	Yes	3	125107778	125107841	1	snRNA	106480388	RNU6-232P	NA	NA	0	0	0	NA	NA	NA	NA	Yes	Mesenchymal_Stem_Cell	2.358e-05	rs106520	1
ENSG00000259868	RP11-1012E15.1	No	No	Yes	14	56382445	56383044	1	lincRNA	NA	NA	NA	NA	0	0	0	NA	NA	NA	NA	Yes	IMR90:Mesenchymal_Stem_Cell:Mesendoderm	3.319e-05	rs17091769	14
ENSG00000243023	UBA52P3	No	No	Yes	14	58607997	58608378	1	pseudogene	122837	UBA52P3	NA	NA	0	0	0	NA	NA	NA	NA	Yes	Mesenchymal_Stem_Cell	3.319e-05	rs17091769	14
ENSG00000258682	CTD-2002H8.2	No	No	Yes	14	58731380	58736399	1	sense_overlapping	NA	NA	NA	NA	0	0	0	NA	NA	NA	NA	Yes	IMR90	3.319e-05	rs17091769	14
ENSG00000180189	HMGB1P14	No	No	Yes	14	58751491	58752116	1	pseudogene	319130	HMGB1P14	NA	NA	0	0	0	NA	NA	NA	NA	Yes	IMR90	3.319e-05	rs17091769	14
ENSG00000268466	AL132989.1	No	No	Yes	14	58754751	58755865	1	protein_coding	NA	NA	NA	NA	0	0	0	NA	NA	NA	NA	Yes	IMR90	3.319e-05	rs17091769	14
ENSG00000252782	RNU6-341P	No	No	Yes	14	58759011	58759106	-1	snRNA	106481287	RNU6-341P	NA	NA	0	0	0	NA	NA	NA	NA	Yes	IMR90	3.319e-05	rs17091769	14
ENSG00000150893	FREM2	No	Yes	No	13	39261266	39460074	1	protein_coding	341640	FREM2	1.25165e-07	0.433904	0	0	5	6.36411e-06	0.014266	GTEx/v8/Spleen	-	No	NA	4.557e-05	rs1072605	13
ENSG00000259133	RP11-1085N6.3	Yes	No	Yes	14	57115683	57197253	-1	protein_coding	NA	NA	NA	NA	20	6.86	0	NA	NA	NA	NA	Yes	Mesendoderm	4.619e-05	rs17091769	14
ENSG00000201640	RN7SKP28	No	No	Yes	4	97269889	97270189	-1	misc_RNA	106479107	RN7SKP28	NA	NA	0	0	0	NA	NA	NA	NA	Yes	Mesenchymal_Stem_Cell	5.402e-05	rs17020797	3
ENSG00000186777	ZNF732	No	No	Yes	4	264464	299110	-1	protein_coding	654254	ZNF732	1.31184e-09	0.0666916	0	0	0	NA	NA	NA	NA	Yes	Promoter_anchored_loops	6.013e-05	rs11247975	2
ENSG00000153707	PTPRD	No	No	Yes	9	8314246	10612723	-1	protein_coding	5789	PTPRD	1	-0.573834	0	0	0	NA	NA	NA	NA	Yes	Mesenchymal_Stem_Cell:hESC	6.551e-05	rs10809696	7
ENSG00000221708	AL353733.1	No	No	Yes	9	9425461	9425558	-1	miRNA	NA	NA	NA	NA	0	0	0	NA	NA	NA	NA	Yes	Left_Ventricle	6.551e-05	rs10809696	7
ENSG00000230920	RP11-527D15.1	No	No	Yes	9	9799423	9803784	1	lincRNA	105375972	LOC105375972	NA	NA	0	0	0	NA	NA	NA	NA	Yes	Left_Ventricle	6.551e-05	rs10809696	7
ENSG00000226717	RP11-87N24.2	No	No	Yes	9	10613202	10620420	1	lincRNA	101929428	PTPRD-AS2	NA	NA	0	0	0	NA	NA	NA	NA	Yes	Mesenchymal_Stem_Cell:hESC	6.551e-05	rs10809696	7
ENSG00000232035	RP11-87N24.3	No	No	Yes	9	10631750	10632203	-1	lincRNA	NA	NA	NA	NA	0	0	0	NA	NA	NA	NA	Yes	Mesenchymal_Stem_Cell:hESC	6.551e-05	rs10809696	7
ENSG00000227138	RP11-421B23.2	No	No	Yes	9	10777357	10777525	1	pseudogene	NA	NA	NA	NA	0	0	0	NA	NA	NA	NA	Yes	Mesenchymal_Stem_Cell:Mesendoderm	6.551e-05	rs10809696	7
ENSG00000229403	RP4-718N17.2	No	No	Yes	7	51681947	51698566	1	lincRNA	NA	NA	NA	NA	0	0	0	NA	NA	NA	NA	Yes	Trophoblast-like_Cell	7.753e-05	rs5884297	6
ENSG00000233960	RP11-153N17.1	No	No	Yes	7	52232931	52260609	-1	lincRNA	NA	NA	NA	NA	0	0	0	NA	NA	NA	NA	Yes	Mesenchymal_Stem_Cell	7.753e-05	rs5884297	6
ENSG00000265676	RN7SL64P	No	No	Yes	7	55960419	55960689	1	misc_RNA	NA	RN7SL64P	NA	NA	0	0	0	NA	NA	NA	NA	Yes	IMR90	7.753e-05	rs5884297	6
ENSG00000175893	ZDHHC21	No	No	Yes	9	14611069	14693469	-1	protein_coding	340481	ZDHHC21	0.0512304	1.0098	0	0	0	NA	NA	NA	NA	Yes	Left_Ventricle	0.000166	rs10809696	7
ENSG00000237714	P4HA2-AS1	No	No	Yes	5	131520569	131528501	1	antisense	100861518	P4HA2-AS1	NA	NA	0	0	0	NA	NA	NA	NA	Yes	Adult_Cortex:IMR90:Mesenchymal_Stem_Cell:Mesendoderm	0.0001941	rs60934439	4
ENSG00000224431	AC063976.7	No	No	Yes	5	131535149	131539180	1	pseudogene	NA	NA	NA	NA	0	0	0	NA	NA	NA	NA	Yes	Fetal_Cortex:IMR90:Mesenchymal_Stem_Cell:Mesendoderm	0.0001941	rs60934439	4
ENSG00000238160	AC116366.5	No	No	Yes	5	131755108	131762406	-1	antisense	NA	NA	NA	NA	0	0	0	NA	NA	NA	NA	Yes	Left_Ventricle:Liver:Spleen:GM12878:IMR90:Mesenchymal_Stem_Cell:Trophoblast-like_Cell	0.0001941	rs60934439	4
ENSG00000202533	Y_RNA	No	No	Yes	5	131803839	131803949	1	misc_RNA	NA	NA	NA	NA	0	0	0	NA	NA	NA	NA	Yes	Left_Ventricle:Liver:Psoas:Spleen:GM12878:IMR90:Mesenchymal_Stem_Cell:Mesendoderm:Trophoblast-like_Cell:hESC	0.0001941	rs60934439	4
ENSG00000234290	AC116366.6	No	Yes	Yes	5	131804582	131808735	-1	antisense	NA	NA	NA	NA	0	0	1	1.85221e-05	0.0120972	BIOSQTL/BIOS_eQTL_geneLevel	+	Yes	Left_Ventricle:Liver:Psoas:Spleen:GM12878:IMR90:Mesenchymal_Stem_Cell:Mesendoderm:Trophoblast-like_Cell:hESC	0.0001941	rs60934439	4
ENSG00000125347	IRF1	No	No	Yes	5	131817301	131826490	-1	protein_coding	3659	IRF1	0.867789	0.555445	0	0	0	NA	NA	NA	NA	Yes	Promoter_anchored_loops:Adult_Cortex:Fetal_Cortex:Left_Ventricle:Liver:Psoas:Spleen:GM12878:IMR90:Mesenchymal_Stem_Cell:Mesendoderm:Trophoblast-like_Cell:hESC	0.0001941	rs60934439	4
ENSG00000113525	IL5	No	No	Yes	5	131877136	131892530	-1	protein_coding	3567	IL5	0.0283744	-0.161789	0	0	0	NA	NA	NA	NA	Yes	Adult_Cortex:Liver:GM12878:IMR90:Mesenchymal_Stem_Cell:Mesendoderm:Trophoblast-like_Cell:hESC	0.0001941	rs60934439	4
ENSG00000113522	RAD50	No	No	Yes	5	131891711	131980313	1	protein_coding	10111	RAD50	3.45028e-15	-1.01827	0	0	0	NA	NA	NA	NA	Yes	Adult_Cortex:Liver:GM12878:IMR90:Mesenchymal_Stem_Cell:Mesendoderm:Trophoblast-like_Cell:hESC	0.0001941	rs60934439	4
ENSG00000169194	IL13	No	No	Yes	5	131991955	131996802	1	protein_coding	3596	IL13	0.0257147	0.123554	0	0	0	NA	NA	NA	NA	Yes	Fetal_Cortex:GM12878:IMR90:Mesenchymal_Stem_Cell	0.0001941	rs60934439	4
ENSG00000131437	KIF3A	No	No	Yes	5	132028320	132073330	-1	protein_coding	11127	KIF3A	0.992416	-0.460356	0	0	0	NA	NA	NA	NA	Yes	Liver:GM12878:IMR90:Mesenchymal_Stem_Cell:Mesendoderm:Trophoblast-like_Cell:hESC	0.0001941	rs60934439	4
ENSG00000201274	RNA5SP192	No	No	Yes	5	132184269	132184388	1	rRNA	100873454	RNA5SP192	NA	NA	0	0	0	NA	NA	NA	NA	Yes	GM12878:IMR90:Mesenchymal_Stem_Cell:Mesendoderm	0.0001941	rs60934439	4
ENSG00000072364	AFF4	No	No	Yes	5	132211071	132299326	-1	protein_coding	27125	AFF4	0.999997	-1.86132	0	0	0	NA	NA	NA	NA	Yes	Adult_Cortex:Fetal_Cortex:GM12878:IMR90:Mesenchymal_Stem_Cell	0.0001941	rs60934439	4
ENSG00000235253	AC010240.2	No	No	Yes	5	132278624	132280742	1	pseudogene	NA	NA	NA	NA	0	0	0	NA	NA	NA	NA	Yes	IMR90:Mesenchymal_Stem_Cell	0.0001941	rs60934439	4
ENSG00000202417	Y_RNA	No	No	Yes	5	132281034	132281146	1	misc_RNA	NA	NA	NA	NA	0	0	0	NA	NA	NA	NA	Yes	GM12878:IMR90:Mesenchymal_Stem_Cell	0.0001941	rs60934439	4
ENSG00000225364	ATP6V0E1P1	No	No	Yes	5	132284185	132284410	1	pseudogene	100874502	ATP6V0E1P1	NA	NA	0	0	0	NA	NA	NA	NA	Yes	GM12878:IMR90:Mesenchymal_Stem_Cell	0.0001941	rs60934439	4
ENSG00000272023	CTC-350I8.1	No	No	Yes	5	132299462	132299856	1	lincRNA	NA	NA	NA	NA	0	0	0	NA	NA	NA	NA	Yes	Adult_Cortex:Fetal_Cortex:GM12878:IMR90:Mesenchymal_Stem_Cell	0.0001941	rs60934439	4
ENSG00000155329	ZCCHC10	No	No	Yes	5	132332677	132362296	-1	protein_coding	54819	ZCCHC10	0.160802	-0.20978	0	0	0	NA	NA	NA	NA	Yes	Adult_Cortex:Fetal_Cortex:GM12878	0.0001941	rs60934439	4
ENSG00000170606	HSPA4	No	No	Yes	5	132387654	132442141	1	protein_coding	3308	HSPA4	0.999958	-0.0696306	0	0	0	NA	NA	NA	NA	Yes	Adult_Cortex:Fetal_Cortex:GM12878	0.0001941	rs60934439	4
ENSG00000113558	SKP1	No	No	Yes	5	133484633	133512729	-1	protein_coding	6500	SKP1	0.224831	2.13201	0	0	0	NA	NA	NA	NA	Yes	Left_Ventricle:Mesenchymal_Stem_Cell	0.0001941	rs60934439	4
ENSG00000181904	C5orf24	No	No	Yes	5	134181370	134195427	1	protein_coding	134553	C5orf24	0.640814	-1.36665	0	0	0	NA	NA	NA	NA	Yes	Left_Ventricle	0.0001941	rs60934439	4
ENSG00000270892	AC006077.4	No	No	Yes	5	134198781	134199123	-1	pseudogene	NA	NA	NA	NA	0	0	0	NA	NA	NA	NA	Yes	Left_Ventricle	0.0001941	rs60934439	4
ENSG00000213622	AL163952.1	No	No	Yes	14	56464932	56465307	-1	pseudogene	NA	NA	NA	NA	0	0	0	NA	NA	NA	NA	Yes	IMR90	0.0001942	rs17091769	14
ENSG00000212522	Y_RNA	No	No	Yes	14	56535161	56535245	1	misc_RNA	NA	NA	NA	NA	0	0	0	NA	NA	NA	NA	Yes	IMR90	0.0001942	rs17091769	14
ENSG00000221254	AL163952.2	No	No	Yes	14	56542198	56542284	1	miRNA	NA	NA	NA	NA	0	0	0	NA	NA	NA	NA	Yes	IMR90	0.0001942	rs17091769	14
ENSG00000242995	RP11-1085N6.1	No	No	Yes	14	57150139	57150459	-1	pseudogene	NA	NA	NA	NA	0	0	0	NA	NA	NA	NA	Yes	Mesendoderm:hESC	0.0001942	rs17091769	14
ENSG00000100557	C14orf105	No	No	Yes	14	57936019	57960585	-1	protein_coding	55195	C14orf105	0.000136147	-0.637275	0	0	0	NA	NA	NA	NA	Yes	IMR90:Mesenchymal_Stem_Cell	0.0001942	rs17091769	14
ENSG00000252837	RN7SKP99	No	No	Yes	14	58304072	58304378	-1	misc_RNA	106479138	RN7SKP99	NA	NA	0	0	0	NA	NA	NA	NA	Yes	IMR90:Mesenchymal_Stem_Cell	0.0001942	rs17091769	14
ENSG00000249592	RP11-440L14.1	No	No	Yes	4	756175	775637	-1	antisense	100129917	LOC100129917	NA	NA	0	0	0	NA	NA	NA	NA	Yes	Promoter_anchored_loops	0.0001976	rs11247975	2
ENSG00000238458	snoU13	No	Yes	No	6	18402182	18402283	-1	snoRNA	NA	NA	NA	NA	0	0	1	2.43577e-10	0	BIOSQTL/BIOS_eQTL_geneLevel	+	No	NA	0.0002034	rs6902848	5
ENSG00000183036	PCP4	No	No	Yes	21	41239243	41301322	1	protein_coding	5121	PCP4	0.0751039	0.134655	0	0	0	NA	NA	NA	NA	Yes	Left_Ventricle	0.0002823	rs112307230	19
ENSG00000250244	CTB-49A3.4	No	No	Yes	5	132592184	132611669	1	antisense	NA	NA	NA	NA	0	0	0	NA	NA	NA	NA	Yes	Promoter_anchored_loops:Mesenchymal_Stem_Cell	0.0006801	rs60934439	4
ENSG00000164398	ACSL6	No	No	Yes	5	131142683	131347936	-1	protein_coding	23305	ACSL6	0.0885623	-1.29258	0	0	0	NA	NA	NA	NA	Yes	IMR90:Mesendoderm	0.0007078	rs60934439	4
ENSG00000223548	AC034228.3	No	No	Yes	5	131339285	131342715	1	antisense	NA	NA	NA	NA	0	0	0	NA	NA	NA	NA	Yes	IMR90:Mesendoderm	0.0007078	rs60934439	4
ENSG00000231585	AC034228.2	No	No	Yes	5	131347141	131348892	1	antisense	NA	NA	NA	NA	0	0	0	NA	NA	NA	NA	Yes	IMR90:Mesendoderm	0.0007078	rs60934439	4
ENSG00000164399	IL3	No	No	Yes	5	131396222	131398897	1	protein_coding	3562	IL3	3.72136e-09	-0.398765	0	0	0	NA	NA	NA	NA	Yes	GM12878	0.0007078	rs60934439	4
ENSG00000229738	AC010240.3	No	No	Yes	5	132323344	132323802	-1	pseudogene	NA	NA	NA	NA	0	0	0	NA	NA	NA	NA	Yes	Mesenchymal_Stem_Cell	0.0007078	rs60934439	4
ENSG00000199677	Y_RNA	No	No	Yes	5	132328791	132328892	-1	misc_RNA	NA	NA	NA	NA	0	0	0	NA	NA	NA	NA	Yes	Mesenchymal_Stem_Cell	0.0007078	rs60934439	4
ENSG00000248648	RP11-485M7.1	No	No	Yes	5	132338811	132339057	1	pseudogene	NA	NA	NA	NA	0	0	0	NA	NA	NA	NA	Yes	Mesenchymal_Stem_Cell	0.0007078	rs60934439	4
ENSG00000249478	CTB-49A3.5	No	No	Yes	5	132579456	132584473	1	antisense	NA	NA	NA	NA	0	0	0	NA	NA	NA	NA	Yes	Mesenchymal_Stem_Cell	0.0007078	rs60934439	4
ENSG00000239642	AC034228.7	No	No	Yes	5	131142816	131281391	-1	pseudogene	728637	MEIKIN	NA	NA	0	0	0	NA	NA	NA	NA	Yes	Mesendoderm	0.0007722	rs60934439	4
ENSG00000234758	AC034228.4	No	No	Yes	5	131280101	131303913	1	antisense	NA	NA	NA	NA	0	0	0	NA	NA	NA	NA	Yes	Mesendoderm	0.0007722	rs60934439	4
ENSG00000213585	VDAC1	No	No	Yes	5	133307606	133340824	-1	protein_coding	7416	VDAC1	0.975595	-0.32609	0	0	0	NA	NA	NA	NA	Yes	Mesenchymal_Stem_Cell	0.0007722	rs60934439	4
ENSG00000271737	CTB-113I20.2	No	No	Yes	5	133340838	133341253	1	lincRNA	NA	NA	NA	NA	0	0	0	NA	NA	NA	NA	Yes	Mesenchymal_Stem_Cell	0.0007722	rs60934439	4
ENSG00000235208	RPL7AL3	Yes	No	No	20	16664753	16665049	-1	pseudogene	128748	RPL7AP13	NA	NA	1	0.763	0	NA	NA	NA	NA	No	NA	0.0009302	rs6111234	17
ENSG00000177675	CD163L1	No	No	Yes	12	7499281	7632493	-1	protein_coding	283316	CD163L1	2.21694e-17	0.629504	0	0	0	NA	NA	NA	NA	Yes	Mesenchymal_Stem_Cell	0.02723	12:5750791	10
ENSG00000187566	NHLRC1	No	Yes	No	6	18120718	18122851	-1	protein_coding	378884	NHLRC1	0.0360065	0.751059	0	0	16	8.8466e-06	6.44089e-17	BIOSQTL/BIOS_eQTL_geneLevel:GTEx/v8/Skin_Not_Sun_Exposed_Suprapubic:GTEx/v8/Skin_Sun_Exposed_Lower_leg	-	No	NA	0.03793	rs6902848	5

## Sheet: Table S4
Supplementary Table S4. Catalogue of previously reported GWAS associations from the database for SNPs identified in analysis of schistosomiasis hyaluronic acid in 637 independent individuals.
Note: Lookup of GWS SNPs was performed using the NHGRI-EBI database as implemented in FUMA. NR=Not reported.
GenomicLocus	IndSigSNP	chr	bp	snp	DateAddedToCatalog	PMID	FirstAuth	Date	Journal	Link	Study	Trait	InitialN	ReplicationN	Region	ReportedGene	MappedGene	UpGene	DownGene	SNP_Gene_ID	UpGeneDist	DownGeneDist	Strongest	SNPs	marged	SNP_ID_cur	Context	intergenic	RiskAF	P	Pmlog	Ptext	OrBeta	95CI	Platform	CNV
2	rs11247975	4	1169813	rs878323	2018-11-16	30072576	Emilsson V	2018-08-02	Science	www.ncbi.nlm.nih.gov/pubmed/30072576	Co-regulatory networks of human serum proteins link genetics to disease.	Blood protein levels	3,200 European ancestry individuals	NA	4p16.3	SPON2	SPON2	NA	NA	ENSG00000159674	NA	NA	rs878323-T	rs878323	0	878323	intron_variant	0	0.68703125	2e-16	15.699	(SPON2, 8099_42_3)	0.212714	[0.16-0.26] unit decrease	Illumina [> 1000000] (imputed)	N
4	rs60934439	5	131722951	rs274555	2019-02-08	30593698	Hubel C	2018-12-28	Am J Med Genet B Neuropsychiatr Genet	www.ncbi.nlm.nih.gov/pubmed/30593698	Genomics of body fat percentage may contribute to sex bias in anorexia nervosa.	Fat-free mass	70,700 European ancestry female individuals, 85,261 European ancestry male individuals	NA	5q31.1	NR	SLC22A5	NA	NA	ENSG00000197375	NA	NA	rs274555-?	rs274555	0	274555	intron_variant	0	NR	2e-16	15.699	NA	0.18633	[0.14-0.23] unit decrease	Affymetrix [7794483] (imputed)	N
4	rs60934439	5	131722951	rs274555	2019-02-08	30593698	Hubel C	2018-12-28	Am J Med Genet B Neuropsychiatr Genet	www.ncbi.nlm.nih.gov/pubmed/30593698	Genomics of body fat percentage may contribute to sex bias in anorexia nervosa.	Fat-free mass	70,700 European ancestry female individuals, 85,261 European ancestry male individuals	NA	5q31.1	NR	SLC22A5	NA	NA	ENSG00000197375	NA	NA	rs274555-?	rs274555	0	274555	intron_variant	0	NR	8e-09	8.09691	(female)	0.14208	[0.094-0.19] unit decrease	Affymetrix [7794483] (imputed)	N
4	rs60934439	5	131722951	rs274555	2019-02-08	30593698	Hubel C	2018-12-28	Am J Med Genet B Neuropsychiatr Genet	www.ncbi.nlm.nih.gov/pubmed/30593698	Genomics of body fat percentage may contribute to sex bias in anorexia nervosa.	Fat-free mass	70,700 European ancestry female individuals, 85,261 European ancestry male individuals	NA	5q31.1	NR	SLC22A5	NA	NA	ENSG00000197375	NA	NA	rs274555-?	rs274555	0	274555	intron_variant	0	NR	6e-10	9.22185	(male)	0.22148	[0.15-0.29] unit decrease	Affymetrix [7794483] (imputed)	N
4	rs60934439	5	131724950	rs274554	2020-01-09	23823483	Rhee EP	2013-07-02	Cell Metab	www.ncbi.nlm.nih.gov/pubmed/23823483	A genome-wide association study of the human metabolome in a community-based cohort.	Metabolite levels	2,076 European ancestry individuals	NA	5q31.1	LOC441108	SLC22A5	NA	NA	ENSG00000197375	NA	NA	rs274554-?	rs274554	0	274554	non_coding_transcript_exon_variant	0	NR	5e-06	5.30103	(carnitine)	0.210812	[0.12-0.3] unit decrease	Affymetrix [at least 2500000] (imputed)	N
4	rs60934439	5	131742228	rs6596075	2008-06-16	17554300	Wellcome Trust Case Control Consortium	2007-06-07	Nature	www.ncbi.nlm.nih.gov/pubmed/17554300	Genome-wide association study of 14,000 cases of seven common diseases and 3,000 shared controls.	Crohn's disease	1,748 European ancestry cases, 2,938 European ancestry controls	(see Parkes 2007)	5q31.1	intergenic	SLC22A5 - IRF1-AS1	ENSG00000197375	ENSG00000197536	NA	10923	4100	rs6596075-C	rs6596075	0	6596075	intergenic_variant	1	0.17	3e-06	5.52288	NA	1.55	[1.00-2.39]	Affymetrix [469557]	N
10	12:5750791	12	5751342	rs2110166	2013-06-14	23382691	Lauc G	2013-01-31	PLoS Genet	www.ncbi.nlm.nih.gov/pubmed/23382691	Loci associated with N-glycosylation of human immunoglobulin G show pleiotropy with autoimmune diseases and haematological cancers.	IgG glycosylation	2,247 European ancestry individuals	NA	12p13.31	NR	ANO2	NA	NA	ENSG00000047617	NA	NA	rs2110166-C	rs2110166	0	2110166	intron_variant	0	0.983043627256318	6e-06	5.22185	(IGP73)	0.562	[0.32-0.81] unit decrease	Illumina [~ 2500000] (imputed)	N
10	12:5750791	12	5751342	rs2110166	2013-06-14	23382691	Lauc G	2013-01-31	PLoS Genet	www.ncbi.nlm.nih.gov/pubmed/23382691	Loci associated with N-glycosylation of human immunoglobulin G show pleiotropy with autoimmune diseases and haematological cancers.	IgG glycosylation	2,247 European ancestry individuals	NA	12p13.31	NR	ANO2	NA	NA	ENSG00000047617	NA	NA	rs2110166-C	rs2110166	0	2110166	intron_variant	0	0.983043522563177	5e-06	5.30103	(IGP52)	0.5673	[0.32-0.81] unit decrease	Illumina [~ 2500000] (imputed)	N
14	rs17091769	14	57066930	rs17091770	2017-09-05	28644415	Guenard F	2017-06-23	Nutrients	www.ncbi.nlm.nih.gov/pubmed/28644415	Genome-Wide Association Study of Dietary Pattern Scores.	Prudent dietary pattern	141 individuals	NA	14q22.3	TMEM260	TMEM260	NA	NA	ENSG00000070269	NA	NA	rs17091770-?	rs17091770	0	17091770	intron_variant	0	NA	5e-06	5.30103	NA	NA	NA	Illumina [2668805]	N
14	rs17091769	14	57112285	rs148485005	2018-12-03	30348214	Zhang Q	2018-10-22	Genome Med	www.ncbi.nlm.nih.gov/pubmed/30348214	Genotype effects contribute to variation in longitudinal methylome patterns in older people.	DNA methylation variation (age effect)	Up to 954 individuals	NA	14q22.3	NR	TMEM260	NA	NA	ENSG00000070269	NA	NA	rs148485005-?	rs148485005	0	148485005	intron_variant	0	NR	1e-09	9	NA	NA	NA	Illumina [7760689] (imputed)	N
15	rs2008259	14	98650988	rs7160389	2019-03-18	30643258	Karlsson Linner R	2019-01-14	Nat Genet	www.ncbi.nlm.nih.gov/pubmed/30643258	Genome-wide association analyses of risk tolerance and risky behaviors in over 1 million individuals identify hundreds of loci and shared genetic influences.	Smoking status (ever vs never smokers)	518,633 European ancestry individuals	NA	14q32.2	C14orf177	LINC02295 - NA	ENSG00000258511	NA	NA	45409	NA	rs7160389-T	rs7160389	0	7160389	intron_variant	1	0.5355	4e-09	8.39794	NA	0.0118826	[0.0079-0.0158] unit decrease	Affymetrix [11514654] (imputed)	N
15	rs2008259	14	98650988	rs7160389	2019-02-08	30595370	Kichaev G	2018-12-27	Am J Hum Genet	www.ncbi.nlm.nih.gov/pubmed/30595370	Leveraging Polygenic Functional Enrichment to Improve GWAS Power.	Eosinophil counts	approximately 440,000 European ancestry individuals	NA	14q32.2	NA	LINC02295 - NA	ENSG00000258511	NA	NA	45409	NA	rs7160389-?	rs7160389	0	7160389	intron_variant	1	NR	3e-08	7.52288	NA	NA	NA	NR [~ 8900000] (imputed)	N
15	rs2008259	14	98655131	rs1381274	2019-03-18	30643258	Karlsson Linner R	2019-01-14	Nat Genet	www.ncbi.nlm.nih.gov/pubmed/30643258	Genome-wide association analyses of risk tolerance and risky behaviors in over 1 million individuals identify hundreds of loci and shared genetic influences.	Risk-taking tendency (4-domain principal component model)	315,894 European ancestry individuals	NA	14q32.2	C14orf177	LINC02295 - NA	ENSG00000258511	NA	NA	49552	NA	rs1381274-T	rs1381274	0	1381274	intron_variant	1	0.4628	6e-13	12.2218	NA	0.0185849	[0.014-0.024] unit increase	Affymetrix [~ 11515000] (imputed)	N
15	rs2008259	14	98655131	rs1381274	2020-09-18	32888494	Vuckovic D	2020-09-01	Cell	www.ncbi.nlm.nih.gov/pubmed/32888494	The Polygenic and Monogenic Basis of Blood Traits and Diseases.	Eosinophil counts	408,112 British individuals	NA	14q32.2	RP11-61O1.1	LINC02295 - NA	ENSG00000258511	NA	NA	49552	NA	rs1381274-T	rs1381274	0	1381274	intron_variant	1	0.463085	2e-09	8.69897	NA	0.0132355	[0.0089-0.0176] unit decrease	Affymetrix [93095623] (imputed)	N
15	rs2008259	14	98655131	rs1381274	2020-09-18	32888494	Vuckovic D	2020-09-01	Cell	www.ncbi.nlm.nih.gov/pubmed/32888494	The Polygenic and Monogenic Basis of Blood Traits and Diseases.	Eosinophil percentage of white cells	408,112 British individuals	NA	14q32.2	RP11-61O1.1	LINC02295 - NA	ENSG00000258511	NA	NA	49552	NA	rs1381274-T	rs1381274	0	1381274	intron_variant	1	0.463081	5e-10	9.30103	NA	0.0138118	[0.0095-0.0182] unit decrease	Affymetrix [93095623] (imputed)	N
15	rs2008259	14	98655131	rs1381274	2019-03-28	30643251	Liu M	2019-01-14	Nat Genet	www.ncbi.nlm.nih.gov/pubmed/30643251	Association studies of up to 1.2 million individuals yield new insights into the genetic etiology of tobacco and alcohol use.	Age of smoking initiation (MTAG)	up to 931,815 European ancestry individuals	NA	14q32.2	NR	LINC02295 - NA	ENSG00000258511	NA	NA	49552	NA	rs1381274-T	rs1381274	0	1381274	intron_variant	1	0.474	1e-10	10	NA	0.00944932	[0.0066-0.0123] unit decrease	NR [9732723] (imputed)	N
15	rs2008259	14	98655131	rs1381274	2019-02-08	30595370	Kichaev G	2018-12-27	Am J Hum Genet	www.ncbi.nlm.nih.gov/pubmed/30595370	Leveraging Polygenic Functional Enrichment to Improve GWAS Power.	Smoking status	approximately 458,000 European ancestry individuals	NA	14q32.2	NA	LINC02295 - NA	ENSG00000258511	NA	NA	49552	NA	rs1381274-?	rs1381274	0	1381274	intron_variant	1	NR	5e-09	8.30103	NA	NA	NA	NR [~ 8900000] (imputed)	N
17	rs6111234	20	16653076	rs2104198	2020-12-24	28322283	Chibnik LB	2017-03-21	Mol Psychiatry	www.ncbi.nlm.nih.gov/pubmed/28322283	Susceptibility to neurofibrillary tangles: role of the PTPRD locus and limited pleiotropy with other neuropathologies.	Neurofibrillary tangles	909 European ancestry individuals	369 individuals	20p12.1	NR	Y_RNA - SNRPB2	ENSG00000201314	ENSG00000125870	NA	1689	57530	rs2104198-C	rs2104198	0	2104198	intergenic_variant	1	0.5	5e-06	5.30103	(EA)	0.08	[0.05-0.12] unit decrease	Affymetrix, Illumina [NR] (imputed)	N
17	rs6111234	20	16660162	rs1885572	2018-09-20	29503163	Yu H	2018-03-01	Lancet Psychiatry	www.ncbi.nlm.nih.gov/pubmed/29503163	Five novel loci associated with antipsychotic treatment response in patients with schizophrenia: a genome-wide association study.	Response to haloperidol in schizophrenia	192 Han Chinese ancestry cases	NA	20p12.1	SNRPB2	Y_RNA - SNRPB2	ENSG00000201314	ENSG00000125870	NA	8775	50444	rs1885572-A	rs1885572	0	1885572	intergenic_variant	1	NR	9e-06	5.04576	NA	12.6252	[7.2-18.05] unit decrease	Illumina [6097251] (imputed)	N
18	rs62205791	20	56324085	rs62205790	2019-02-08	30595370	Kichaev G	2018-12-27	Am J Hum Genet	www.ncbi.nlm.nih.gov/pubmed/30595370	Leveraging Polygenic Functional Enrichment to Improve GWAS Power.	Lung function (FVC)	approximately 372,000 European ancestry individuals	NA	20q13.31	NA	NKILA - NA	ENSG00000278709	NA	NA	36249	NA	rs62205790-?	rs62205790	0	62205790	intergenic_variant	1	NR	3e-08	7.52288	NA	NA	NA	NR [~ 8900000] (imputed)	N
18	rs62205791	20	56325452	rs62205791	2018-09-17	29844566	Davies G	2018-05-29	Nat Commun	www.ncbi.nlm.nih.gov/pubmed/29844566	Study of 300,486 individuals identifies 148 independent genetic loci influencing general cognitive function.	Reaction time	330,069 European ancestry individuals	NA	20q13.31	NR	NKILA - NA	ENSG00000278709	NA	NA	37616	NA	rs62205791-?	rs62205791	0	62205791	intergenic_variant	1	NR	7e-06	5.1549	NA	0.0076957	[0.0043-0.0111] unit decrease	Affymetrix [805426] (imputed)	N

## Sheet: Table S5
Supplementary Table S5. Summary statistics table of associated eQTL rs62205791 according to QTLbase.
eQTL = GWAS SNP linked to gene via expression quantitative trait locus mapping, NA= not available; xQTL: genomic locus (e.g., a genetic variant) that explains all or a fraction of variation in certain molecular trait (no matter which trait) is referred to as xQTL; PVAL=study original P-value (filter <0.1); Effect size = beta, or t-statistic, or chi-squared statistic, or odds ratio, or LOD score; …
Trait	CHR	START	END	Effective_Allele	tissue	Tissue_State	xqtl	Effect_Size	Effect_Size_Desc	SE	SE_Desc	PVAL	FDR	PMID	Journal	year	Platform	Population	Sample_Size
RAB22A	20	56884771	56942563	NA	Blood-Neutrophils CD16+	normal	eQTL	-0.2615	beta	0.1319	Original reported SE	0.0474	0.363	27863251	Cell	2016	HiSeq 2000	MIX	197
PMEPA1	20	56223448	56286592	G	Artery-Aorta	Artery_Aorta	eQTL	-0.409737	beta	0.0776138	Original reported SE	1.47e-06	NA	32913072	Science	2020	null	EUR	387
PMEPA1	20	56223448	56286592	G	Artery-Aorta	normal	eQTL	-0.385133	beta	0.0434693	Original reported SE	3.06e-16	NA	25954001	Science	2015	Illumina HiSeq 2000	EUR	267
PMEPA1	20	56223448	56286592	G	Artery-Tibial	normal	eQTL	-0.228228	beta	0.0304055	Original reported SE	6.05e-13	NA	25954001	Science	2015	Illumina HiSeq 2000	EUR	388
PMEPA1	20	56223448	56286592	G	Blood	null	eQTL	NA	NA	NA	Estimated SE	3.16e-07	NA	bioRxiv_447367	bioRxiv	2018	Illumina HT-12v3, Illumina HT-12v4 and Illumina HT-12v4 WGDASL arrays	MIX	31684
PMEPA1	20	56223448	56286592	G	Blood-Monocytes CD14+	normal	eQTL	-0.08072	beta	0.0312427	Estimated SE	0.0105	0.297	27863251	Cell	2016	HiSeq 2000	MIX	197
PMEPA1	20	56223448	56286592	A	Blood-Monocytes CD14+	normal	eQTL	-0.1548	beta	0.0449145	Estimated SE	0.000694	0.0388	27863251	Cell	2016	HiSeq 2000	MIX	197
PMEPA1	20	56223448	56286592	NA	Blood-Monocytes CD14+	normal	eQTL	-0.502	beta	0.1316	Original reported SE	0.000137	0.0584	27863251	Cell	2016	HiSeq 2000	MIX	197
PMEPA1	20	56223448	56286592	NA	Brain-Prefrontal Cortex	schizophrenia, mood disorder and normal	eQTL	0.109834	beta	0.0264029	Estimated SE	3.79e-05	0.0067	27668389	Nature neuroscience	2016	HiSeq 2500	EUR	467
PMEPA1	20	56223448	56286592	NA	Brain-Prefrontal Cortex	normal	eQTL	NA	NA	NA	Estimated SE	6.4e-06	NA	28869584	Nature neuroscience	2017	Illumina HiSeq	EUR	494
PMEPA1	20	56223448	56286592	NA	Brain-Prefrontal Cortex	schizophrenia, mood disorder and normal	eQTL	0.105755	beta	0.0200355	Estimated SE	2e-07	2.79e-05	27668389	Nature neuroscience	2016	HiSeq 2500	EUR	467
PMEPA1	20	56223448	56286592	G	Heart-Atrial Appendage	Heart_Atrial_Appendage	eQTL	-0.423054	beta	0.085539	Original reported SE	9.32e-06	NA	32913072	Science	2020	null	EUR	372
PMEPA1	20	56223448	56286592	G	Heart-Atrial Appendage	normal	eQTL	-0.281874	beta	0.0512281	Original reported SE	1.07e-07	NA	25954001	Science	2015	Illumina HiSeq 2000	EUR	264
PMEPA1	20	56223448	56286592	G	Heart-Left Ventricle	normal	eQTL	-0.271137	beta	0.0485599	Original reported SE	6.91e-08	NA	25954001	Science	2015	Illumina HiSeq 2000	EUR	272
BMP7	20	55743809	55841697	NA	Brain-Prefrontal Cortex	schizophrenia, mood disorder and normal	eQTL	0.121872	beta	0.037533	Estimated SE	0.00125	0.121	27668389	Nature neuroscience	2016	HiSeq 2500	EUR	467
PPP4R1L	20	56803996	56884507	NA	Blood-Neutrophils CD16+	normal	eQTL	0.2191	beta	0.1326	Original reported SE	0.0983	0.442	27863251	Cell	2016	HiSeq 2000	MIX	197
ZBP1	20	56178902	56195632	G	Blood	null	eQTL	NA	NA	NA	Estimated SE	0.00636	NA	bioRxiv_447367	bioRxiv	2018	Illumina HT-12v3, Illumina HT-12v4 and Illumina HT-12v4 WGDASL arrays	MIX	31684
ZBP1	20	56178902	56195632	G	Blood-T cell CD4+ naive	normal	eQTL	-0.03005	beta	0.0149436	Estimated SE	0.0457	0.589	27863251	Cell	2016	HiSeq 2000	MIX	197
ZBP1	20	56178902	56195632	A	Blood-T cell CD4+ naive	normal	eQTL	-0.0496	beta	0.0201305	Estimated SE	0.0146	0.257	27863251	Cell	2016	HiSeq 2000	MIX	197
ZBP1	20	56178902	56195632	G	Blood-Monocytes CD14+	normal	eQTL	0.03952	beta	0.0148852	Estimated SE	0.00858	0.272	27863251	Cell	2016	HiSeq 2000	MIX	197
ZBP1	20	56178902	56195632	A	Blood-Monocytes CD14+	normal	eQTL	0.0663	beta	0.0238621	Estimated SE	0.00599	0.161	27863251	Cell	2016	HiSeq 2000	MIX	197
AL035541.1	20	56174751	56176256	A	Blood-T cell CD4+ naive	normal	eQTL	-0.3987	beta	0.203765	Estimated SE	0.0518	0.458	27863251	Cell	2016	HiSeq 2000	MIX	197
HMGB1P1	20	56063448	56064083	NA	Blood-T cell CD4+ naive	normal	eQTL	0.2401	beta	0.1392	Original reported SE	0.0846	0.617	27863251	Cell	2016	HiSeq 2000	MIX	197

## Sheet: Table S6
Supplementary Table S6. Schistosomiasis hyaluronic acid susceptibility functional candidate genes identified via SMR analysis
Genes formatted in bold: decreased gene expression linked to increased risk of elevated serum levels of HA. Genes not in bold: increased gene expression linked to increased risk of elevated serum levels of HA. Columns: Tissue; Probe ID; Probe chromosome; Gene, gene name; Probe_bp, probe position; topSNP, SNP ID; topSNP_bp, top eQTL position; A1, effect allele; A2, alternative allele; Freq, freque…
Tissue	probeID	ProbeChr	Gene	Probe_bp	topSNP	topSNP_chr	topSNP_bp	A1	A2	Freq	b_GWAS	se_GWAS	p_GWAS	b_eQTL	se_eQTL	p_eQTL	b_SMR	se_SMR	p_SMR	p_HEIDI	nsnp_HEIDI
Artery_Tibial.v8	ENSG00000124225.15	20	PMEPA1	57648392	rs62205791	20	57750396	G	A	0.0595238	0.1863	0.03706	6.52e-07	-0.258199	0.0287241	2.49672e-19	-0.721536	0.164453	1.14666e-05
Skin_Not_Sun_Exposed_Suprapubic.v8	ENSG00000089250.18	12	NOS1	117208142	rs61536991	12	117353775	GT	G	0.456349	0.1689	0.03722	6.79e-06	-0.543349	0.0481224	1.45401e-29	-0.31085	0.0738264	2.5475e-05	0.403139	10
Artery_Aorta.v8	ENSG00000124225.15	20	PMEPA1	57648392	rs62205790	20	57749029	C	T	0.0595238	0.1556	0.03758	3.93e-05	-0.406889	0.0382137	1.78665e-26	-0.382414	0.0990966	0.000113852
Heart_Atrial_Appendage.v8	ENSG00000124225.15	20	PMEPA1	57648392	rs62205791	20	57750396	G	A	0.0595238	0.1863	0.03706	6.52e-07	-0.252093	0.0439784	9.91326e-09	-0.739013	0.195532	0.000157147
Skin_Sun_Exposed_Lower_leg.v8	ENSG00000176659.7	20	C20orf197	60055925	rs6064881	20	60039185	A	G	0.519841	0.1478	0.03817	0.0001199	0.520071	0.045982	1.16664e-29	0.284192	0.0775758	0.000248881
Whole_Blood.v8	ENSG00000141252.19	17	VPS53	508668	rs12941393	17	543314	C	T	0.193452	0.1448	0.03935	0.0002539	-0.844789	0.0449104	6.18787e-79	-0.171404	0.0474626	0.000304614	0.00393773	20
Skin_Not_Sun_Exposed_Suprapubic.v8	ENSG00000176659.7	20	C20orf197	60055925	rs6015626	20	60040322	G	A	0.519841	0.1445	0.03891	0.000225	0.546618	0.0426488	1.32168e-37	0.264353	0.0741111	0.000361121	0.310798	6
Lung.v8	ENSG00000141252.19	17	VPS53	508668	rs12941393	17	543314	C	T	0.193452	0.1448	0.03935	0.0002539	-0.646206	0.0463311	3.25465e-44	-0.224077	0.0629775	0.000373621	0.00844226	20
Nerve_Tibial.v8	ENSG00000141252.19	17	VPS53	508668	rs12941393	17	543314	C	T	0.193452	0.1448	0.03935	0.0002539	-0.615615	0.0466931	1.08069e-39	-0.235212	0.0663628	0.000393606	0.0410223	14
Brain_Cortex.v8	ENSG00000242686.4	4	RP11-1191J2.2	652850	rs9998786	4	684999	C	T	0.0634921	0.1443	0.03904	0.0002388	-1.0303	0.085329	1.44135e-33	-0.140056	0.0396275	0.000408827
Brain_Nucleus_accumbens_basal_ganglia.v8	ENSG00000242686.4	4	RP11-1191J2.2	652850	rs9998786	4	684999	C	T	0.0634921	0.1443	0.03904	0.0002388	-0.773815	0.066749	4.47646e-31	-0.186479	0.0529536	0.000429033
Lung.v8	ENSG00000261644.2	16	RP11-327F22.1	50727417	rs17313747	16	50740822	G	A	0.0595238	0.1379	0.0376	0.0002666	0.615533	0.0526328	1.35411e-31	0.224033	0.0640186	0.000466124	0.328043	3
Artery_Tibial.v8	ENSG00000261644.2	16	RP11-327F22.1	50727417	rs17313747	16	50740822	G	A	0.0595238	0.1379	0.0376	0.0002666	0.696992	0.0611955	4.71162e-30	0.19785	0.056674	0.000481172	0.22653	3
Pituitary.v8	ENSG00000242686.4	4	RP11-1191J2.2	652850	rs9998786	4	684999	C	T	0.0634921	0.1443	0.03904	0.0002388	-0.888679	0.0843066	5.58755e-26	-0.162376	0.0465528	0.000486664
Muscle_Skeletal.v8	ENSG00000175262.14	1	C1orf127	10946473	rs7511959	1	10957552	C	T	0.238095	0.1467	0.03877	0.0001711	-0.24662	0.0274832	2.87285e-19	-0.594842	0.17061	0.000489272	0.232541	4
Testis.v8	ENSG00000242686.4	4	RP11-1191J2.2	652850	rs9998786	4	684999	C	T	0.0634921	0.1443	0.03904	0.0002388	-0.77779	0.0751381	4.12105e-25	-0.185526	0.0532974	0.000499631
Brain_Hypothalamus.v8	ENSG00000242686.4	4	RP11-1191J2.2	652850	rs9998786	4	684999	C	T	0.0634921	0.1443	0.03904	0.0002388	-0.836388	0.0808535	4.43301e-25	-0.172528	0.0495671	0.000500127
Spleen.v8	ENSG00000141252.19	17	VPS53	508668	rs12941393	17	543314	C	T	0.193452	0.1448	0.03935	0.0002539	-0.980495	0.0920116	1.63115e-26	-0.147681	0.0424582	0.000504694	0.0718226	9
Nerve_Tibial.v8	ENSG00000261644.2	16	RP11-327F22.1	50727417	rs17313747	16	50740822	G	A	0.0595238	0.1379	0.0376	0.0002666	0.734599	0.0671774	7.82202e-28	0.187721	0.0539865	0.000506687	0.239773	3
Testis.v8	ENSG00000144231.10	2	POLR2D	127843551	rs13031513	2	127857816	T	G	0.315476	-0.137	0.03839	0.0003879	0.62002	0.041351	8.02714e-51	-0.220961	0.0636469	0.000517242	0.0887772	20
Brain_Caudate_basal_ganglia.v8	ENSG00000242686.4	4	RP11-1191J2.2	652850	rs9998786	4	684999	C	T	0.0634921	0.1443	0.03904	0.0002388	-0.765991	0.0777375	6.61597e-23	-0.188383	0.0544345	0.000538696
Brain_Frontal_Cortex_BA9.v8	ENSG00000242686.4	4	RP11-1191J2.2	652850	rs9998786	4	684999	C	T	0.0634921	0.1443	0.03904	0.0002388	-0.861575	0.0884042	1.92153e-22	-0.167484	0.0484617	0.000548246
Breast_Mammary_Tissue.v8	ENSG00000141252.19	17	VPS53	508668	rs12941393	17	543314	C	T	0.193452	0.1448	0.03935	0.0002539	-0.524146	0.0526594	2.43437e-23	-0.276259	0.0800407	0.000557522	0.0554354	9
Skin_Sun_Exposed_Lower_leg.v8	ENSG00000089250.18	12	NOS1	117208142	rs4766845	12	117349749	T	G	0.405754	0.1315	0.03756	0.0004971	-0.84595	0.0439801	1.89193e-82	-0.155447	0.0451293	0.000572176	0.0647075	15
Colon_Transverse.v8	ENSG00000141252.19	17	VPS53	508668	rs12941393	17	543314	C	T	0.193452	0.1448	0.03935	0.0002539	-0.640657	0.0664117	5.07379e-22	-0.226018	0.0657382	0.000585703	0.00309376	20
Muscle_Skeletal.v8	ENSG00000144231.10	2	POLR2D	127843551	rs2405635	2	127879651	G	A	0.37004	-0.1406	0.03888	0.0003251	-0.248843	0.0232877	1.18888e-26	0.565015	0.164948	0.000613863	0.00621666	20
Breast_Mammary_Tissue.v8	ENSG00000242686.4	4	RP11-1191J2.2	652850	rs9998786	4	684999	C	T	0.0634921	0.1443	0.03904	0.0002388	-0.505736	0.055538	8.53764e-20	-0.285327	0.0833113	0.000615189
Colon_Sigmoid.v8	ENSG00000242686.4	4	RP11-1191J2.2	652850	rs9998786	4	684999	C	T	0.0634921	0.1443	0.03904	0.0002388	-0.687621	0.0764573	2.39411e-19	-0.209854	0.0613834	0.000629116
Colon_Transverse.v8	ENSG00000273179.1	4	RP11-20I20.4	1167778	rs11538062	4	1171976	T	C	0.181548	0.1491	0.03737	7.409e-05	0.326537	0.0492822	3.45241e-11	0.45661	0.13359	0.000630856	0.558538	9
Esophagus_Muscularis.v8	ENSG00000261644.2	16	RP11-327F22.1	50727417	rs17313747	16	50740822	G	A	0.0595238	0.1379	0.0376	0.0002666	0.749446	0.0803731	1.11416e-20	0.184003	0.0539116	0.000642421	0.538485	3
Adipose_Subcutaneous.v8	ENSG00000261644.2	16	RP11-327F22.1	50727417	rs17313747	16	50740822	G	A	0.0595238	0.1379	0.0376	0.0002666	0.658426	0.0709509	1.69449e-20	0.209439	0.0614039	0.000647625	0.36503	3
Esophagus_Muscularis.v8	ENSG00000242686.4	4	RP11-1191J2.2	652850	rs9998786	4	684999	C	T	0.0634921	0.1443	0.03904	0.0002388	-0.48657	0.0555328	1.92083e-18	-0.296566	0.0870823	0.000660233
Skin_Sun_Exposed_Lower_leg.v8	ENSG00000273179.1	4	RP11-20I20.4	1167778	rs62293577	4	1175485	C	T	0.181548	0.1471	0.03767	0.0001042	0.277701	0.0400931	4.31663e-12	0.529706	0.155722	0.000669901	0.284867	11
Adipose_Subcutaneous.v8	ENSG00000242686.4	4	RP11-1191J2.2	652850	rs9998786	4	684999	C	T	0.0634921	0.1443	0.03904	0.0002388	-0.507494	0.0585238	4.26182e-18	-0.284338	0.0836237	0.00067334
Prostate.v8	ENSG00000242686.4	4	RP11-1191J2.2	652850	rs9998786	4	684999	C	T	0.0634921	0.1443	0.03904	0.0002388	-0.717172	0.0851161	3.58264e-17	-0.201207	0.0594435	0.000712186
Whole_Blood.v8	ENSG00000261644.2	16	RP11-327F22.1	50727417	rs17313747	16	50740822	G	A	0.0595238	0.1379	0.0376	0.0002666	0.433175	0.0493001	1.54304e-18	0.318347	0.0940591	0.000712971	0.0163674	6
Brain_Hippocampus.v8	ENSG00000242686.4	4	RP11-1191J2.2	652850	rs9998786	4	684999	C	T	0.0634921	0.1443	0.03904	0.0002388	-0.689064	0.082565	7.07813e-17	-0.209415	0.0619645	0.000725942
Brain_Cerebellar_Hemisphere.v8	ENSG00000175262.14	1	C1orf127	10946473	rs34691090	1	10957560	C	G	0.237103	0.1522	0.03828	7.869e-05	-0.672633	0.105234	1.63962e-10	-0.226275	0.0670228	0.000735235
Cells_Cultured_fibroblasts.v8	ENSG00000121988.17	2	ZRANB3	135136916	rs16831455	2	135216198	G	A	0.217262	0.1336	0.03747	0.0003897	-0.333101	0.032111	3.27624e-25	-0.40108	0.118948	0.000746522	0.116775	10
Nerve_Tibial.v8	ENSG00000256274.1	12	TAS2R64P	11076769	rs7138108	12	10900730	T	C	0.197421	-0.1358	0.03755	0.0003243	-0.639134	0.070119	7.86813e-20	0.212475	0.0632068	0.000774971	0.0054991	14
Thyroid.v8	ENSG00000144233.9	2	AMMECR1L	127861630	rs7584140	2	127871978	C	A	0.371032	-0.1397	0.03853	0.000313	0.228381	0.0255593	4.05973e-19	-0.611697	0.18207	0.000780308	0.176185	20
Esophagus_Muscularis.v8	ENSG00000178222.12	4	RNF212	1056254	rs28569895	4	1148530	T	A	0.340278	0.1435	0.03829	0.0001953	-0.488221	0.0644031	3.43689e-14	-0.293924	0.0874883	0.000780605	0.302165	14
Colon_Transverse.v8	ENSG00000242686.4	4	RP11-1191J2.2	652850	rs9998786	4	684999	C	T	0.0634921	0.1443	0.03904	0.0002388	-0.498322	0.062293	1.24777e-15	-0.289572	0.0863013	0.000792621
Testis.v8	ENSG00000176601.12	2	MAP3K19	134964491	rs72320452	2	135369576	C	CT	0.21627	0.1294	0.03753	0.0006036	-0.670206	0.0472838	1.32494e-45	-0.193075	0.0576307	0.000807495	0.436391	11
Nerve_Tibial.v8	ENSG00000255374.3	12	TAS2R43	11091287	rs7298262	12	10926663	T	C	0.196429	-0.1351	0.03754	0.0003441	-0.597335	0.0652845	5.70788e-20	0.226171	0.0675324	0.000810806	0.00352298	13
Nerve_Tibial.v8	ENSG00000178222.12	4	RNF212	1056254	rs28569895	4	1148530	T	A	0.340278	0.1435	0.03829	0.0001953	-0.445858	0.0604608	1.65164e-13	-0.321851	0.0963334	0.000834731	0.187778	13
Artery_Tibial.v8	ENSG00000255374.3	12	TAS2R43	11091287	rs11054069	12	10905518	C	T	0.197421	-0.136	0.03751	0.0003135	-0.484556	0.0566241	1.15426e-17	0.280669	0.0840726	0.000842579	0.0374943	9
Cells_Cultured_fibroblasts.v8	ENSG00000261644.2	16	RP11-327F22.1	50727417	rs17313747	16	50740822	G	A	0.0595238	0.1379	0.0376	0.0002666	0.637477	0.0800642	1.69175e-15	0.216322	0.0649391	0.000864902	0.551001	3
Artery_Aorta.v8	ENSG00000261644.2	16	RP11-327F22.1	50727417	rs78636108	16	50777561	A	T	0.0555556	0.1311	0.03769	0.0005413	0.793402	0.0688986	1.10204e-30	0.165238	0.0496241	0.000869127
Lung.v8	ENSG00000178222.12	4	RNF212	1056254	rs28569895	4	1148530	T	A	0.340278	0.1435	0.03829	0.0001953	-0.459819	0.0638135	5.77572e-13	-0.312079	0.0938615	0.00088453	0.0864638	12
Thyroid.v8	ENSG00000137364.4	6	TPMT	18128311	rs146172059	6	18158055	T	C	0.119048	0.1355	0.03785	0.0003709	0.280563	0.0314289	4.38081e-19	0.482957	0.145351	0.000891519	0.350768	8
Heart_Left_Ventricle.v8	ENSG00000124225.15	20	PMEPA1	57648392	rs62205790	20	57749029	C	T	0.0595238	0.1556	0.03758	3.93e-05	-0.230657	0.0417022	3.18312e-08	-0.674595	0.20352	0.000917613
Testis.v8	ENSG00000256274.1	12	TAS2R64P	11076769	rs3851589	12	10950445	G	A	0.196429	-0.1344	0.03761	0.0003785	-0.748311	0.0846007	9.13543e-19	0.179604	0.0542066	0.000921917	0.0156766	9
Thyroid.v8	ENSG00000272927.1	4	RP11-1191J2.5	661209	rs9998786	4	684999	C	T	0.0634921	0.1443	0.03904	0.0002388	0.190488	0.0258722	1.80302e-13	0.757528	0.229324	0.000955494
Artery_Aorta.v8	ENSG00000256274.1	12	TAS2R64P	11076769	rs7138108	12	10900730	T	C	0.197421	-0.1358	0.03755	0.0003243	-0.553991	0.0685358	6.30682e-16	0.24513	0.0742556	0.000962832	0.0331743	12
Spleen.v8	ENSG00000261644.2	16	RP11-327F22.1	50727417	rs78636108	16	50777561	A	T	0.0555556	0.1311	0.03769	0.0005413	1.03039	0.100235	8.69835e-25	0.127233	0.0386157	0.000984699

## Sheet: Table S7
Supplementary Table S7. SNPs in the genomic loci associated with schistosomiasis serum levels of aspartate aminotransferase in GWAS analysis of 637 independent individuals.
Note: Associated genomic loci were defined by all SNPs in LD (r2>0.6) with an independent significant (P < 1e-5) SNP. CADD: Combined Annotation Dependent Depletion score; RDB: Regulome DB score; MAF: effect allele frequency; MAF: Regression coefficient.
rsID	chr	pos	non_effect_allele	effect_allele	MAF	gwasP	beta	se	r2	IndSigSNP	GenomicLocus	nearestGene	dist	func	CADD	RDB	minChrState	commonChrState	posMapFilt	eqtlMapFilt	ciMapFilt
14:45956891	14	45956891	TTTTATTTATTTATTTA	TTTTA	0.09623	2.091e-05	0.1598	0.03728	0.872949	rs370396655	7	RP11-454K7.2	15053	intergenic	NA	NA	9	15	0	0	1
rs138569031	19	55909137	TGAGGTGG	T	0.1409	1.274e-05	0.1651	0.03752	0.817143	rs12460492	11	RPL28	0	intronic	NA	NA	5	5	1	0	1
rs74044137	14	45908158	A	G	0.09325	0.000174	0.141	0.03735	0.834765	rs370396655	7	RP11-454K7.1	49668	intergenic	19.62	6	15	15	0	1	1
rs9560706	13	91507969	T	G	0.0625	0.000353	0.1346	0.03747	0.765402	rs138481477	5	LINC00410	35238	intergenic	19.5	3a	5	15	0	0	1
rs17730159	14	45907992	T	C	0.09325	0.000174	0.141	0.03735	0.834765	rs370396655	7	RP11-454K7.1	49502	intergenic	17.3	7	15	15	0	1	1
rs1954861	18	32418265	G	A	0.04464	4.998e-05	0.1528	0.03741	0.835696	rs511638	9	DTNA	0	intronic	16.02	6	1	15	1	1	1
rs57735278	14	45908903	C	T	0.09425	0.0003025	0.1358	0.03737	0.824616	rs370396655	7	RP11-454K7.1	50413	intergenic	14.8	6	9	15	0	1	1
rs116985620	14	45939627	T	C	0.07639	0.0006398	0.1282	0.03736	0.669321	rs370396655	7	RP11-454K7.2	32317	intergenic	13.99	7	9	15	0	0	1
rs35620481	18	32391436	A	AT	0.04663	0.001169	0.1237	0.03791	0.726946	rs511638	9	DTNA	0	intronic	13.39	NA	5	15	1	0	1
rs143402753	14	45961115	CT	C	0.09425	1.569e-05	0.1625	0.03733	0.893989	rs370396655	7	RP11-454K7.2	10829	intergenic	13.27	NA	7	15	0	1	1
rs74044166	14	45981868	G	A	0.09226	1.569e-05	0.1625	0.03733	0.890144	rs370396655	7	RP11-454K7.2	9524	intergenic	13.21	6	9	15	1	1	1
rs11626999	14	45997304	A	G	0.125	0.0001026	0.1491	0.03812	0.643906	rs370396655	7	RP11-454K7.2	24960	intergenic	12.57	6	9	15	0	1	1
rs56087686	14	45939651	T	C	0.09524	1.959e-05	0.1604	0.03727	0.883366	rs370396655	7	RP11-454K7.2	32293	intergenic	12.28	6	9	15	0	1	1
rs28504981	19	55909116	A	G	0.05159	1.418e-05	0.1639	0.03745	0.85814	rs12460492	11	RPL28	0	intronic	12.2	6	5	5	1	0	1
rs78563403	14	45911923	T	C	0.09325	0.0001719	0.1413	0.03737	0.834765	rs370396655	7	RP11-454K7.1	53433	intergenic	12.18	7	8	15	0	1	1
rs138569031	19	55909137	TGAGGTGGGAGGTGG	T	0.05159	1.274e-05	0.1651	0.03752	0.817143	rs12460492	11	RPL28	0	NA	12.12	NA	5	5	1	0	1
rs17557695	18	32418186	T	A	0.04464	4.808e-05	0.153	0.03737	0.835696	rs511638	9	DTNA	0	intronic	12.11	6	1	15	1	1	1
rs6924024	6	100096427	A	G	0.04067	NA	NA	NA	0.609633	rs4240581	4	Y_RNA	6203	intergenic	11.71	4	9	15	1	0	1
rs143712437	2	172750463	C	T	0.06052	0.0003157	0.1363	0.03764	0.931185	rs145640663	1	SLC25A12	0	intronic	11.65	2b	1	1	1	0	1
rs1786601	18	32419194	T	C	0.04464	4.998e-05	0.1528	0.03741	0.835696	rs511638	9	DTNA	0	intronic	11.62	6	2	15	1	1	1
rs74044134	14	45898415	A	G	0.09325	0.000174	0.141	0.03735	0.834765	rs370396655	7	RP11-454K7.1	39925	intergenic	11.51	7	5	15	0	1	1
rs11963696	6	100166086	C	A	0.04067	NA	NA	NA	0.762997	rs4240581	4	Y_RNA	75862	intergenic	11.46	7	9	15	0	0	1
rs200704787	3	53860668	C	T	0.2163	1.538e-05	0.1694	0.03885	0.945651	rs61124991	2	CHDH	0	intronic	10.77	7	5	15	1	0	1
rs74044143	14	45915795	C	A	0.09325	0.000174	0.141	0.03735	0.834765	rs370396655	7	RP11-454K7.2	56149	intergenic	10.53	7	9	15	0	1	1
rs1790523	18	32396582	A	T	0.04464	0.0003199	0.1356	0.03746	0.835696	rs511638	9	DTNA	0	intronic	10.39	6	4	15	1	1	1
rs1790528	18	32408202	G	C	0.04563	7.505e-05	0.1487	0.03731	0.816235	rs511638	9	DTNA	0	intronic	10.29	1f	4	15	1	1	1
rs374436111	6	100098526	A	G	0.04067	NA	NA	NA	0.609633	rs4240581	4	Y_RNA	8302	intergenic	10.26	7	9	15	1	0	1
rs12637132	3	53862437	T	A	0.2093	9.322e-06	0.1744	0.039	0.987395	rs61124991	2	CHDH	0	intronic	9.991	7	5	15	1	1	1
rs9560705	13	91507566	A	G	0.0625	0.000353	0.1346	0.03747	0.765402	rs138481477	5	LINC00410	35641	intergenic	9.878	6	5	15	0	0	1
rs62432512	6	100114982	C	T	0.04365	NA	NA	NA	0.703681	rs4240581	4	Y_RNA	24758	intergenic	9.737	7	14	15	0	1	1
rs139494362	14	45843815	A	AT	0.07143	0.002616	0.1134	0.03754	0.617906	rs370396655	7	RP11-454K7.1	2655	intergenic	9.657	NA	5	15	1	1	1
rs67876743	14	45890554	G	A	0.09623	0.0003025	0.1358	0.03737	0.804909	rs370396655	7	RP11-454K7.1	32064	intergenic	9.604	6	15	15	0	1	1
rs1790534	18	32409571	T	C	0.04464	4.671e-05	0.1529	0.0373	0.835696	rs511638	9	DTNA	0	intronic	9.57	NA	4	15	1	1	1
rs11624393	14	45907104	A	G	0.09623	0.0003025	0.1358	0.03737	0.804909	rs370396655	7	RP11-454K7.1	48614	intergenic	9.518	6	15	15	0	1	1
rs73760516	6	100132430	G	A	0.04067	NA	NA	NA	0.762997	rs4240581	4	Y_RNA	42206	intergenic	9.357	7	14	15	0	0	1
rs11628937	14	45972939	T	G	0.09623	1.569e-05	0.1625	0.03733	0.872949	rs370396655	7	RP11-454K7.2	595	upstream	9.021	7	5	15	1	1	1
rs145640663	2	172891013	A	G	0.05853	5.885e-07	0.1919	0.03801	1	rs145640663	1	METAP1D	0	intronic	8.801	6	5	15	1	0	0
rs59737054	14	45871610	A	G	0.09226	0.00028	0.1377	0.03769	0.780454	rs370396655	7	RP11-454K7.1	13120	intergenic	8.708	7	5	15	0	1	1
rs75353545	14	45960336	C	G	0.09425	1.569e-05	0.1625	0.03733	0.893989	rs370396655	7	RP11-454K7.2	11608	intergenic	8.617	6	9	15	0	1	1
rs9556049	13	91522070	C	T	0.0625	0.0003842	0.1346	0.03771	0.765402	rs138481477	5	LINC00410	21137	intergenic	8.411	5	5	15	0	0	1
rs12590125	14	45857615	C	T	0.0754	0.003935	0.1089	0.03761	0.60039	rs370396655	7	RP11-454K7.1	0	ncRNA_intronic	7.618	5	8	15	1	1	1
rs9583180	13	108233596	G	A	0.08036	5.071e-06	0.1708	0.03713	0.986515	rs957788	6	FAM155A	0	intronic	7.477	2b	1	15	1	0	1
rs1623716	18	32411292	C	A	0.04464	4.671e-05	0.1529	0.0373	0.835696	rs511638	9	DTNA	0	intronic	7.177	NA	4	15	1	1	1
rs144056621	6	100171256	C	T	0.04067	NA	NA	NA	0.762997	rs4240581	4	Y_RNA	81032	intergenic	6.979	5	9	15	0	0	1
rs12587908	14	45857887	T	G	0.0754	0.003935	0.1089	0.03761	0.60039	rs370396655	7	RP11-454K7.1	0	ncRNA_intronic	6.784	5	8	15	1	1	1
rs80222890	14	45880227	G	T	0.09325	0.000174	0.141	0.03735	0.834765	rs370396655	7	RP11-454K7.1	21737	intergenic	6.724	7	5	15	0	1	1
rs7997511	13	91561009	G	C	0.07143	0.0008989	0.126	0.03777	0.628478	rs138481477	5	LINC00410	0	ncRNA_intronic	6.641	5	5	15	1	0	1
rs34441097	14	45900899	C	A	0.09325	0.000174	0.141	0.03735	0.834765	rs370396655	7	RP11-454K7.1	42409	intergenic	6.606	7	5	15	0	1	1
rs524969	18	32452066	T	A	0.04663	9.857e-06	0.1667	0.0374	0.959009	rs511638	9	DTNA	0	intronic	6.558	5	4	15	1	1	1
rs59010232	14	45920617	C	T	0.09623	0.0003025	0.1358	0.03737	0.804909	rs370396655	7	RP11-454K7.2	51327	intergenic	6.545	7	9	15	0	1	1
rs4240581	6	100201543	A	T	0.05258	6.536e-06	0.1696	0.0373	1	rs4240581	4	Y_RNA	111319	intergenic	6.363	6	13	15	0	1	0
rs9560715	13	91549027	T	A	0.06944	0.0004133	0.1339	0.03772	0.650591	rs138481477	5	LINC00410	0	ncRNA_intronic	6.269	7	5	15	1	0	1
rs28670474	14	45841135	G	A	0.09524	0.0002796	0.1381	0.03778	0.773894	rs370396655	7	RP11-454K7.3	1092	intergenic	6.262	7	5	15	1	1	1
rs12985701	19	55909910	T	C	0.05159	1.418e-05	0.1639	0.03745	0.85814	rs12460492	11	RPL28	0	intronic	6.219	5	1	5	1	0	1
rs10507985	13	91509934	G	A	0.06448	0.0003355	0.1353	0.03752	0.737512	rs138481477	5	LINC00410	33273	intergenic	6.194	5	5	15	0	0	1
rs57525293	18	32402808	G	GTCT	0.04464	4.704e-05	0.1528	0.03728	0.835696	rs511638	9	DTNA	0	intronic	6.164	NA	4	15	1	1	1
rs2891577	19	55914444	T	C	0.04663	1.702e-05	0.1615	0.03726	0.953275	rs12460492	11	RPL28:UBE2S	0:0	exonic	6.012	1f	3	4	1	0	1
rs3810169	19	55896082	C	T	0.06548	0.0002786	0.1372	0.03753	0.661265	rs12460492	11	TMEM238	115	upstream	5.973	NA	1	2	1	1	1
rs1786605	18	32428928	G	A	0.04464	2.908e-05	0.1575	0.03739	0.835696	rs511638	9	DTNA	0	intronic	5.931	1f	4	15	1	1	1
rs12590702	14	45891358	G	A	0.09325	0.000174	0.141	0.03735	0.834765	rs370396655	7	RP11-454K7.1	32868	intergenic	5.884	5	15	15	0	1	1
rs58624710	13	108242222	CCAAA	C	0.07937	5.071e-06	0.1708	0.03713	1	rs957788	6	FAM155A	0	intronic	5.772	NA	5	15	1	0	1
rs949216	18	32422326	T	C	0.04464	4.808e-05	0.153	0.03737	0.835696	rs511638	9	DTNA	0	intronic	5.767	NA	5	15	1	1	1
rs511638	18	32456354	T	C	0.04861	8.95e-06	0.1684	0.0376	1	rs511638	9	DTNA	0	intronic	5.764	NA	4	15	1	1	1
rs74044163	14	45976378	G	C	0.09425	1.569e-05	0.1625	0.03733	0.893989	rs370396655	7	RP11-454K7.2	4034	intergenic	5.721	6	9	15	1	1	1
rs56315017	14	45978189	A	G	0.09921	4.085e-05	0.1541	0.0373	0.842879	rs370396655	7	RP11-454K7.2	5845	intergenic	5.521	7	9	15	1	1	1
rs1958632	14	45911493	G	C	0.09623	0.0003025	0.1358	0.03737	0.804909	rs370396655	7	RP11-454K7.1	53003	intergenic	5.51	7	9	15	0	1	1
14:45874532	14	45874532	T	G	0.07937	0.007598	0.1013	0.03784	0.679638	rs370396655	7	RP11-454K7.1	16042	intergenic	5.488	NA	5	15	0	0	1
rs1540064	18	32425727	A	G	0.04464	4.998e-05	0.1528	0.03741	0.835696	rs511638	9	DTNA	0	intronic	5.455	NA	4	15	1	1	1
rs1622440	18	32414905	A	G	0.04464	4.998e-05	0.1528	0.03741	0.835696	rs511638	9	DTNA	0	intronic	5.415	5	1	15	1	1	1
rs11629109	14	45907191	T	C	0.09623	0.0003025	0.1358	0.03737	0.804909	rs370396655	7	RP11-454K7.1	48701	intergenic	5.406	7	15	15	0	1	1
rs4402465	14	45958984	A	G	0.09623	2.091e-05	0.1598	0.03728	0.872949	rs370396655	7	RP11-454K7.2	12960	intergenic	5.379	7	9	15	0	1	1
rs74044162	14	45970040	G	A	0.09226	1.569e-05	0.1625	0.03733	0.890144	rs370396655	7	RP11-454K7.2	1904	intergenic	5.341	6	5	15	1	1	1
rs11617953	13	108220280	A	C	0.09722	0.005482	0.1067	0.0383	0.602804	rs957788	6	FAM155A	0	intronic	5.334	6	5	15	1	0	1
rs74674054	3	121025815	C	T	0.1042	5.166e-06	0.1795	0.03899	1	rs74674054	3	STXBP5L	0	intronic	5.299	7	9	15	1	0	1
imm_19_53928277	19	49236465	G	A	0.128	5.014e-05	0.1523	0.03729	0.679406	rs62132778	10	RASIP1	0	intronic	5.228	7	4	15	1	1	1
rs112933141	14	45866595	A	T	0.08333	0.000219	0.141	0.03791	0.672059	rs370396655	7	RP11-454K7.1	8105	intergenic	5.216	6	5	15	1	1	1
rs7248405	19	55925356	C	A	0.04663	9.832e-06	0.1659	0.03721	0.953275	rs12460492	11	UBE2S	6210	intergenic	5.144	6	14	15	1	0	1
rs75067524	14	45984561	C	T	0.09226	2.091e-05	0.1598	0.03728	0.890144	rs370396655	7	RP11-454K7.2	12217	intergenic	5.118	6	9	15	0	1	1
rs112828571	19	55908513	G	C	0.05159	1.462e-05	0.1638	0.03749	0.85814	rs12460492	11	RPL28	0	intronic	5.1	7	5	5	1	0	1
rs59252936	14	45991626	TTAAGA	T	0.123	0.0002726	0.1388	0.03791	0.632712	rs370396655	7	RP11-454K7.2	19282	intergenic	4.988	NA	9	15	0	1	1
13:91503956	13	91503956	A	G	0.0625	0.0001034	0.147	0.03761	0.712518	rs138481477	5	LINC00410	39251	intergenic	4.932	NA	1	15	0	0	1
rs78481860	14	46002221	A	C	0.125	0.0003184	0.1381	0.03814	0.643906	rs370396655	7	RP11-454K7.2	29877	intergenic	4.747	7	9	15	0	1	1
rs7152782	14	45878045	T	C	0.09623	0.0003025	0.1358	0.03737	0.804909	rs370396655	7	RP11-454K7.1	19555	intergenic	4.726	7	5	15	0	1	1
rs11846292	14	45881878	A	G	0.09623	0.0003025	0.1358	0.03737	0.804909	rs370396655	7	RP11-454K7.1	23388	intergenic	4.678	6	9	15	0	1	1
rs9946576	18	32408900	T	C	0.04464	4.704e-05	0.1528	0.03728	0.835696	rs511638	9	DTNA	0	intronic	4.64	6	4	15	1	1	1
rs28503188	14	45858083	T	C	0.0754	0.003935	0.1089	0.03761	0.60039	rs370396655	7	RP11-454K7.1	0	ncRNA_intronic	4.606	7	8	15	1	1	1
rs1957404	14	45850323	G	A	0.07143	0.001635	0.1185	0.03745	0.617906	rs370396655	7	RP11-454K7.1	0	ncRNA_intronic	4.602	NA	9	15	1	1	1
rs1617318	18	32444040	G	A	0.04663	2.096e-05	0.1598	0.03729	0.959009	rs511638	9	DTNA	0	intronic	4.6	5	4	15	1	1	1
rs116866566	6	100114571	G	A	0.04067	NA	NA	NA	0.609633	rs4240581	4	Y_RNA	24347	intergenic	4.532	6	14	15	0	0	1
rs10403361	19	55912475	T	C	0.04563	0.0001284	0.1477	0.03833	0.758228	rs12460492	11	RPL28	0	intronic	4.444	4	4	4	1	0	1
rs72674949	14	45994728	A	G	0.125	0.0001844	0.1432	0.03806	0.643906	rs370396655	7	RP11-454K7.2	22384	intergenic	4.408	6	9	15	0	1	1
rs12462594	19	55922885	T	C	0.04663	9.832e-06	0.1659	0.03721	0.953275	rs12460492	11	UBE2S	3739	intergenic	4.392	6	5	15	1	0	1
rs639304	18	32456417	T	A	0.04663	9.896e-06	0.167	0.03747	0.959009	rs511638	9	DTNA	0	intronic	4.296	7	4	15	1	1	1
rs878767	18	32421639	A	G	0.04464	4.808e-05	0.153	0.03737	0.835696	rs511638	9	DTNA	0	intronic	4.262	1f	5	15	1	1	1
rs1790524	18	32397050	T	A	0.04464	0.0003199	0.1356	0.03746	0.835696	rs511638	9	DTNA	0	intronic	4.249	6	4	15	1	1	1
rs10415761	19	55926548	T	C	0.04663	9.832e-06	0.1659	0.03721	0.953275	rs12460492	11	UBE2S	7402	intergenic	4.164	7	13	15	1	0	1
rs548653	6	100132684	G	A	0.04167	NA	NA	NA	0.742283	rs4240581	4	Y_RNA	42460	intergenic	4.13	6	14	15	0	1	1
rs637914	18	32456099	T	A	0.04663	1.499e-05	0.1635	0.03747	0.959009	rs511638	9	DTNA	0	intronic	4.095	6	4	15	1	0	1
rs111672674	13	91502667	C	T	0.06349	0.0001093	0.1465	0.03762	0.724987	rs138481477	5	LINC00410	40540	intergenic	4.043	6	1	15	0	0	1
rs113509843	14	45944582	T	G	0.09821	3.863e-05	0.1546	0.03729	0.852712	rs370396655	7	RP11-454K7.2	27362	intergenic	3.885	6	9	15	0	1	1
rs28635028	19	55910058	G	A	0.0506	1.418e-05	0.1639	0.03745	0.834413	rs12460492	11	RPL28	0	intronic	3.87	5	1	5	1	0	1
rs957788	13	108257220	T	C	0.07937	5.071e-06	0.1708	0.03713	1	rs957788	6	FAM155A	0	intronic	3.798	NA	5	15	1	0	1
rs138815174	13	91503317	A	C	0.0625	0.0001351	0.1445	0.03763	0.712518	rs138481477	5	LINC00410	39890	intergenic	3.784	7	1	15	0	0	1
rs138110178	6	100093084	G	A	0.04067	NA	NA	NA	0.609633	rs4240581	4	Y_RNA	2860	intergenic	3.766	6	13	15	1	0	1
2:172790515	2	172790515	A	G	0.06052	0.0002026	0.1398	0.03741	0.931185	rs145640663	1	SLC25A12:HAT1	0:0	intronic	3.74	7	4	5	1	0	1
rs1786599	18	32405749	T	C	0.04464	4.704e-05	0.1528	0.03728	0.835696	rs511638	9	DTNA	0	intronic	3.718	6	4	15	1	1	1
rs370654672	14	45947108	T	C	0.09623	3.358e-05	0.1563	0.03741	0.872949	rs370396655	7	RP11-454K7.2	24836	intergenic	3.713	6	9	15	0	0	1
rs73504745	6	100099170	T	G	0.04067	NA	NA	NA	0.609633	rs4240581	4	Y_RNA	8946	intergenic	3.685	3a	9	15	1	0	1
rs9560712	13	91544572	T	A	0.06944	0.0004133	0.1339	0.03772	0.650591	rs138481477	5	LINC00410	0	ncRNA_exonic	3.669	7	5	15	1	0	1
rs1540063	18	32425956	C	G	0.04464	4.998e-05	0.1528	0.03741	0.835696	rs511638	9	DTNA	0	intronic	3.667	6	4	15	1	1	1
rs55985795	14	45937576	A	G	0.09524	1.959e-05	0.1604	0.03727	0.883366	rs370396655	7	RP11-454K7.2	34368	intergenic	3.642	6	5	15	0	1	1
rs7996847	13	91581612	C	T	0.06944	0.002046	0.117	0.03779	0.627042	rs138481477	5	LINC00410	2760	intergenic	3.63	6	5	15	1	0	1
rs16970756	13	108237124	A	G	0.07937	5.071e-06	0.1708	0.03713	1	rs957788	6	FAM155A	0	intronic	3.618	5	5	15	1	0	1
rs12977195	19	55909792	A	T	0.0506	1.418e-05	0.1639	0.03745	0.876183	rs12460492	11	RPL28	0	intronic	3.618	4	1	5	1	0	1
rs79613494	14	45962189	G	A	0.08135	0.0003695	0.1343	0.03751	0.752182	rs370396655	7	RP11-454K7.2	9755	intergenic	3.615	5	7	15	1	1	1
rs73606242	19	55923981	A	C	0.04663	9.832e-06	0.1659	0.03721	0.953275	rs12460492	11	UBE2S	4835	intergenic	3.604	7	5	15	1	0	1
rs74044131	14	45889552	C	G	0.09325	0.000174	0.141	0.03735	0.834765	rs370396655	7	RP11-454K7.1	31062	intergenic	3.59	6	9	15	0	1	1
rs143496747	6	100135458	C	T	0.04067	NA	NA	NA	0.762997	rs4240581	4	Y_RNA	45234	intergenic	3.533	7	14	15	0	0	1
rs1786600	18	32413885	C	T	0.04464	4.808e-05	0.153	0.03737	0.835696	rs511638	9	DTNA	0	intronic	3.519	6	4	15	1	1	1
rs74044150	14	45934412	G	A	0.09325	1.959e-05	0.1604	0.03727	0.904825	rs370396655	7	RP11-454K7.2	37532	intergenic	3.497	6	5	15	0	1	1
rs117993179	14	45859660	A	G	0.09226	0.0005325	0.132	0.0379	0.780454	rs370396655	7	RP11-454K7.1	1170	intergenic	3.48	7	5	15	1	1	1
rs56207059	14	45864512	C	T	0.08333	0.0002263	0.1404	0.03784	0.672059	rs370396655	7	RP11-454K7.1	6022	intergenic	3.444	7	5	15	1	1	1
rs73760517	6	100136145	G	C	0.04067	NA	NA	NA	0.762997	rs4240581	4	Y_RNA	45921	intergenic	3.422	7	14	15	0	0	1
rs61124991	3	53864766	T	C	0.2093	4.434e-06	0.1801	0.03885	1	rs61124991	2	CHDH	0	intronic	3.412	6	4	15	1	1	1
rs7236971	18	32361012	G	C	0.04861	0.0009148	0.1254	0.03764	0.730821	rs511638	9	DTNA	0	intronic	3.371	7	5	15	1	0	1
rs74044141	14	45914630	A	G	0.09325	0.000174	0.141	0.03735	0.834765	rs370396655	7	RP11-454K7.1	56140	intergenic	3.349	6	9	15	0	1	1
rs73619625	19	55909500	G	A	0.05159	1.418e-05	0.1639	0.03745	0.85814	rs12460492	11	RPL28	0	intronic	3.337	4	2	5	1	0	1
rs139792130	18	32424519	A	AACTAATAATGCTTTCTCAGGT	0.04464	4.998e-05	0.1528	0.03741	0.835696	rs511638	9	DTNA	0	intronic	3.297	NA	1	15	1	1	1
rs11660071	18	32416667	G	C	0.04464	4.808e-05	0.153	0.03737	0.835696	rs511638	9	DTNA	0	intronic	3.264	6	5	15	1	1	1
rs138143059	6	100103299	G	C	0.04067	NA	NA	NA	0.609633	rs4240581	4	Y_RNA	13075	intergenic	3.208	5	14	15	0	0	1
rs137910642	14	45972119	G	GTGTTTGAGTTTTCAATGACA	0.09524	3.19e-05	0.1564	0.03733	0.857749	rs370396655	7	RP11-454K7.2	0	ncRNA_exonic	3.161	NA	5	15	1	1	1
rs60774035	6	100093733	T	G	0.04067	NA	NA	NA	0.609633	rs4240581	4	Y_RNA	3509	intergenic	3.062	6	7	15	1	0	1
rs149037799	19	55924924	CAATT	C	0.04663	9.832e-06	0.1659	0.03721	0.953275	rs12460492	11	UBE2S	5778	intergenic	3.039	NA	14	15	1	0	1
rs55947766	14	46004928	G	A	0.122	0.0003772	0.1365	0.03816	0.638809	rs370396655	7	RP11-945F5.1	32269	intergenic	3.035	7	9	15	0	1	1
rs112173477	14	45858290	C	T	0.07143	0.003051	0.1118	0.0376	0.617906	rs370396655	7	RP11-454K7.1	0	ncRNA_exonic	3.022	6	5	15	1	1	1
rs111261256	14	45858359	C	T	0.07143	0.003051	0.1118	0.0376	0.617906	rs370396655	7	RP11-454K7.1	0	ncRNA_exonic	2.996	7	5	15	1	1	1
rs199642306	6	100135254	A	AT	0.04067	NA	NA	NA	0.762997	rs4240581	4	Y_RNA	45030	intergenic	2.992	NA	14	15	0	0	1
rs17635954	13	91511242	G	C	0.0625	0.0003355	0.1353	0.03752	0.765402	rs138481477	5	LINC00410	31965	intergenic	2.975	5	5	15	0	0	1
rs4337156	13	91503333	C	T	0.0625	0.0001351	0.1445	0.03763	0.712518	rs138481477	5	LINC00410	39874	intergenic	2.951	7	1	15	0	0	1
rs370396655	14	45951737	A	G	0.08532	4.899e-06	0.175	0.03795	1	rs370396655	7	RP11-454K7.2	20207	intergenic	2.89	7	1	15	0	0	1
rs111331821	19	55910321	T	C	0.05159	1.418e-05	0.1639	0.03745	0.85814	rs12460492	11	RPL28	0	intronic	2.769	4	2	5	1	0	1
rs1944997	18	32394998	A	G	0.04464	0.0003492	0.1352	0.03761	0.835696	rs511638	9	DTNA	0	intronic	2.754	6	5	15	1	1	1
rs145173719	14	45980482	ACT	A	0.09226	1.569e-05	0.1625	0.03733	0.890144	rs370396655	7	RP11-454K7.2	8138	intergenic	2.751	NA	9	15	1	1	1
rs77280684	14	45985250	T	G	0.09524	2.091e-05	0.1598	0.03728	0.883366	rs370396655	7	RP11-454K7.2	12906	intergenic	2.718	6	9	15	0	1	1
rs144893281	13	91496385	A	G	0.06349	0.0001373	0.1448	0.03774	0.724987	rs138481477	5	LINC00410	46822	intergenic	2.698	6	5	15	0	0	1
rs1958634	14	45893269	A	T	0.09623	0.0003025	0.1358	0.03737	0.804909	rs370396655	7	RP11-454K7.1	34779	intergenic	2.641	6	15	15	0	1	1
rs11619840	13	108218958	C	A	0.09722	0.005337	0.1048	0.0375	0.602804	rs957788	6	FAM155A	0	intronic	2.624	5	5	15	1	0	1
rs1958631	14	45941507	C	T	0.09821	3.863e-05	0.1546	0.03729	0.852712	rs370396655	7	RP11-454K7.2	30437	intergenic	2.614	NA	9	15	0	1	1
rs148132872	14	45967073	T	A	0.09425	2.091e-05	0.1598	0.03728	0.868329	rs370396655	7	RP11-454K7.2	4871	intergenic	2.605	5	5	15	1	1	1
rs1790527	18	32407987	G	A	0.04464	4.704e-05	0.1528	0.03728	0.835696	rs511638	9	DTNA	0	intronic	2.579	1f	4	15	1	1	1
rs7336852	13	108230535	G	A	0.07738	NA	NA	NA	0.946523	rs957788	6	FAM155A	0	intronic	2.575	6	5	15	1	0	1
rs2415889	14	45994713	C	A	0.128	0.0002353	0.1409	0.03808	0.626412	rs370396655	7	RP11-454K7.2	22369	intergenic	2.565	6	9	15	0	1	1
rs10414353	19	55926471	G	A	0.04663	9.832e-06	0.1659	0.03721	0.953275	rs12460492	11	UBE2S	7325	intergenic	2.512	7	13	15	1	0	1
rs1786595	18	32399259	C	T	0.04464	2.083e-05	0.1597	0.03725	0.835696	rs511638	9	DTNA	0	intronic	2.478	6	1	15	1	1	1
rs16944943	13	91580558	A	G	0.07143	0.000764	0.1276	0.03774	0.628478	rs138481477	5	LINC00410	1706	intergenic	2.464	5	5	15	1	0	1
rs12608251	18	32362870	T	G	0.04861	0.0009148	0.1254	0.03764	0.730821	rs511638	9	DTNA	0	intronic	2.456	6	5	15	1	1	1
rs113990253	19	55908049	C	T	0.05357	1.576e-05	0.1634	0.03753	0.823987	rs12460492	11	RPL28	0	intronic	2.336	7	5	5	1	0	1
rs7142055	14	45987005	C	T	0.124	0.0003738	0.1358	0.03794	0.626704	rs370396655	7	RP11-454K7.2	14661	intergenic	2.316	7	9	15	0	1	1
rs12979256	19	55909782	T	G	0.0506	1.418e-05	0.1639	0.03745	0.876183	rs12460492	11	RPL28	0	intronic	2.28	4	1	5	1	0	1
rs77557447	14	45849850	T	A	0.07143	0.002157	0.1157	0.03756	0.617906	rs370396655	7	RP11-454K7.1	0	ncRNA_intronic	2.271	6	14	15	1	1	1
rs138481477	13	91506307	G	A	0.08036	7.894e-06	0.1692	0.03755	1	rs138481477	5	LINC00410	36900	intergenic	2.26	5	1	15	0	0	1
kgp2331185	19	55926188	C	A	0.04663	9.832e-06	0.1659	0.03721	0.953275	rs12460492	11	UBE2S	7042	intergenic	2.182	7	13	15	1	0	1
rs10136044	14	45890064	T	G	0.09623	0.0003025	0.1358	0.03737	0.804909	rs370396655	7	RP11-454K7.1	31574	intergenic	2.177	6	15	15	0	1	1
rs949217	18	32421916	C	A	0.04464	4.998e-05	0.1528	0.03741	0.835696	rs511638	9	DTNA	0	intronic	2.096	NA	5	15	1	1	1
rs143560966	14	45974623	TAAAG	T	0.09226	1.569e-05	0.1625	0.03733	0.890144	rs370396655	7	RP11-454K7.2	2279	intergenic	2.076	NA	14	15	1	1	1
rs16944857	13	91514243	C	T	0.0625	0.0003355	0.1353	0.03752	0.765402	rs138481477	5	LINC00410	28964	intergenic	2.049	7	5	15	0	0	1
rs13050198	21	35819082	T	C	0.09127	2.215e-06	0.1782	0.03731	1	rs13050198	12	KCNE1	0	UTR3	1.974	5	2	15	1	0	1
rs74827186	14	45946018	A	T	0.09821	3.863e-05	0.1546	0.03729	0.852712	rs370396655	7	RP11-454K7.2	25926	intergenic	1.94	6	9	15	0	1	1
rs9952825	18	32395456	G	A	0.04464	0.0003372	0.1355	0.03758	0.835696	rs511638	9	DTNA	0	intronic	1.939	5	5	15	1	1	1
rs10682590	14	45897860	A	AAT	0.09623	0.0003025	0.1358	0.03737	0.804909	rs370396655	7	RP11-454K7.1	39370	intergenic	1.92	NA	5	15	0	1	1
rs377165220	14	45967638	A	G	0.09425	2.091e-05	0.1598	0.03728	0.868329	rs370396655	7	RP11-454K7.2	4306	intergenic	1.89	7	5	15	1	0	1
rs8008128	14	45852255	T	G	0.07143	0.002919	0.1122	0.03757	0.617906	rs370396655	7	RP11-454K7.1	0	ncRNA_intronic	1.772	3a	9	15	1	1	1
rs1958633	14	45893270	C	T	0.09623	0.0003025	0.1358	0.03737	0.804909	rs370396655	7	RP11-454K7.1	34780	intergenic	1.757	NA	15	15	0	1	1
rs77553772	14	46000617	C	T	0.121	0.0001279	0.1466	0.03801	0.644997	rs370396655	7	RP11-454K7.2	28273	intergenic	1.752	6	9	15	0	1	1
rs74044160	14	45961374	A	T	0.09425	1.569e-05	0.1625	0.03733	0.893989	rs370396655	7	RP11-454K7.2	10570	intergenic	1.751	7	7	15	0	1	1
rs9560701	13	91495771	C	T	0.06349	0.0001373	0.1448	0.03774	0.724987	rs138481477	5	LINC00410	47436	intergenic	1.741	7	1	15	0	0	1
rs12589140	14	45956323	C	T	0.09524	2.091e-05	0.1598	0.03728	0.883366	rs370396655	7	RP11-454K7.2	15621	intergenic	1.669	7	9	15	0	1	1
rs75792235	19	55910357	C	T	0.0506	1.418e-05	0.1639	0.03745	0.834413	rs12460492	11	RPL28	0	intronic	1.669	4	2	5	1	0	1
rs9560722	13	91588296	G	T	0.07044	0.002025	0.1171	0.03779	0.616172	rs138481477	5	LINC00410	9444	intergenic	1.653	6	5	15	1	0	1
rs8011302	14	45969242	A	G	0.09921	3.141e-05	0.1566	0.03735	0.842879	rs370396655	7	RP11-454K7.2	2702	intergenic	1.616	5	5	15	1	1	1
rs8010307	14	45914421	A	C	0.09524	0.0003025	0.1358	0.03737	0.814666	rs370396655	7	RP11-454K7.1	55931	intergenic	1.614	7	9	15	0	1	1
rs9560711	13	91537839	G	A	0.06845	0.0004133	0.1339	0.03772	0.662116	rs138481477	5	LINC00410	5368	intergenic	1.607	7	9	15	1	0	1
rs4562980	14	46020576	A	G	0.126	0.0002202	0.142	0.0382	0.637992	rs370396655	7	RP11-945F5.1	16621	intergenic	1.589	4	1	15	0	1	1
rs12979229	19	55909768	T	C	0.0506	1.418e-05	0.1639	0.03745	0.876183	rs12460492	11	RPL28	0	intronic	1.568	2b	1	5	1	0	1
rs79206416	18	32452887	G	A	0.03373	NA	NA	NA	0.698923	rs511638	9	DTNA	0	intronic	1.546	5	5	15	1	0	1
rs74044146	14	45926592	C	A	0.09226	7.037e-05	0.1494	0.03732	0.84512	rs370396655	7	RP11-454K7.2	45352	intergenic	1.516	6	9	15	0	1	1
rs56261735	13	108260350	C	T	0.08036	6.035e-06	0.1701	0.03726	0.986515	rs957788	6	FAM155A	0	intronic	1.506	6	5	15	1	0	1
rs141426493	19	55909571	CAAAAAG	C	0.05159	1.418e-05	0.1639	0.03745	0.85814	rs12460492	11	RPL28	0	intronic	1.48	NA	2	5	1	0	1
rs8010708	14	45993792	G	A	0.125	0.0003446	0.1365	0.03793	0.620784	rs370396655	7	RP11-454K7.2	21448	intergenic	1.468	7	9	15	0	1	1
rs376687088	19	55910176	TCTC	T	0.0506	1.418e-05	0.1639	0.03745	0.834413	rs12460492	11	RPL28	0	intronic	1.463	NA	1	5	1	1	1
rs141274890	6	100179050	T	A	0.04067	NA	NA	NA	0.762997	rs4240581	4	Y_RNA	88826	intergenic	1.453	6	14	15	0	0	1
rs9956004	18	32366574	C	T	0.04861	0.0007258	0.1281	0.0377	0.730821	rs511638	9	DTNA	0	intronic	1.452	6	5	15	1	0	1
rs1957400	14	45869073	A	G	0.09226	0.00028	0.1377	0.03769	0.780454	rs370396655	7	RP11-454K7.1	10583	intergenic	1.441	NA	5	15	0	1	1
rs139094827	2	172706097	G	A	0.06151	0.003837	0.1114	0.03837	0.856515	rs145640663	1	SLC25A12	0	intronic	1.424	7	5	5	1	0	1
rs62132778	19	49234624	G	C	0.1756	1.72e-07	0.1961	0.03709	1	rs62132778	10	RASIP1	0	intronic	1.412	4	4	15	1	1	1
rs12460492	19	55923807	G	A	0.04464	4.077e-06	0.1732	0.03725	1	rs12460492	11	UBE2S	4661	intergenic	1.382	7	5	15	1	0	1
rs72258338	19	55914865	AGAAAGAAAG	A	0.04663	1.302e-05	0.1642	0.03736	0.953275	rs12460492	11	UBE2S	0	intronic	1.37	NA	3	4	1	0	1
rs9961576	18	32364353	T	C	0.04861	0.0009148	0.1254	0.03764	0.730821	rs511638	9	DTNA	0	intronic	1.338	6	5	15	1	0	1
rs67153654	13	108224984	T	A	0.09722	0.00287	0.113	0.03774	0.602804	rs957788	6	FAM155A	0	intronic	1.322	6	1	15	1	0	1
rs113894543	6	100090513	A	G	0.04067	NA	NA	NA	0.609633	rs4240581	4	Y_RNA	289	upstream	1.313	6	13	15	1	0	1
rs10426501	19	55894218	C	T	0.06647	0.0002145	0.1405	0.03773	0.65026	rs12460492	11	TMEM238	0	intronic	1.301	4	1	7	1	0	1
rs1626394	18	32405071	C	T	0.04464	4.855e-05	0.1527	0.03734	0.835696	rs511638	9	DTNA	0	intronic	1.285	6	4	15	1	1	1
rs11659517	18	32450942	A	T	0.03373	NA	NA	NA	0.698923	rs511638	9	DTNA	0	intronic	1.283	4	4	15	1	0	1
rs75162016	14	45886401	A	C	0.09325	0.000174	0.141	0.03735	0.834765	rs370396655	7	RP11-454K7.1	27911	intergenic	1.281	6	9	15	0	1	1
6:100200915	6	100200915	G	A	0.04762	0.0001471	0.1424	0.0373	0.899944	rs4240581	4	Y_RNA	110691	intergenic	1.239	7	13	15	0	0	0
rs1957402	14	45868904	A	G	0.09623	0.0003706	0.135	0.0377	0.764706	rs370396655	7	RP11-454K7.1	10414	intergenic	1.238	NA	5	15	0	1	1
rs118000212	6	100145546	T	C	0.03968	NA	NA	NA	0.743768	rs4240581	4	Y_RNA	55322	intergenic	1.235	7	14	15	0	0	1
rs9484245	6	100193003	A	C	0.05258	NA	NA	NA	1	rs4240581	4	Y_RNA	102779	intergenic	1.208	5	7	14	0	1	1
rs1480434	18	32361687	G	A	0.04861	0.0009148	0.1254	0.03764	0.730821	rs511638	9	DTNA	0	intronic	1.195	6	5	15	1	0	1
rs148296519	13	108228295	GTGTA	G	0.09722	0.01067	0.09778	0.03818	0.602804	rs957788	6	FAM155A	0	intronic	1.181	NA	7	15	1	0	1
rs4806669	19	55901653	A	G	0.06448	0.000145	0.1439	0.03764	0.672599	rs12460492	11	RPL28	0	UTR3	1.163	5	3	4	1	0	1
rs1124917	19	55916936	C	T	0.04663	1.499e-05	0.1625	0.03725	0.953275	rs12460492	11	UBE2S	0	intronic	1.148	NA	1	5	1	0	1
rs10131512	14	45977692	A	C	0.09821	4.195e-05	0.154	0.03733	0.852712	rs370396655	7	RP11-454K7.2	5348	intergenic	1.145	6	9	15	1	1	1
rs11968560	6	100143582	T	C	0.04067	NA	NA	NA	0.762997	rs4240581	4	Y_RNA	53358	intergenic	1.13	6	14	15	0	0	1
rs4403955	14	46013228	A	G	0.128	0.0005206	0.1331	0.03816	0.626412	rs370396655	7	RP11-945F5.1	23969	intergenic	1.127	7	9	15	0	1	1
rs11842287	13	91508349	T	C	0.0625	0.000353	0.1346	0.03747	0.765402	rs138481477	5	LINC00410	34858	intergenic	1.114	6	5	15	0	0	1
rs11842161	13	108246475	C	T	0.07937	5.071e-06	0.1708	0.03713	1	rs957788	6	FAM155A	0	intronic	1.083	7	5	15	1	0	1
rs142216307	14	46019579	T	C	0.125	0.001152	0.1244	0.03808	0.620784	rs370396655	7	RP11-945F5.1	17618	intergenic	1.063	7	15	15	0	0	1
rs182104572	6	100102100	A	G	0.03968	NA	NA	NA	0.627425	rs4240581	4	Y_RNA	11876	intergenic	1.053	6	14	15	0	0	1
rs7151659	14	46020502	T	G	0.129	0.0003685	0.1369	0.03821	0.620742	rs370396655	7	RP11-945F5.1	16695	intergenic	0.986	4	1	15	0	1	1
rs113546685	19	55908082	G	C	0.05258	1.521e-05	0.1635	0.03751	0.840753	rs12460492	11	RPL28	0	intronic	0.98	7	5	5	1	0	1
rs138909697	14	46017315	T	G	0.125	0.0002811	0.1394	0.03815	0.643906	rs370396655	7	RP11-945F5.1	19882	intergenic	0.936	7	15	15	0	1	1
rs112026658	19	55909351	A	G	0.05159	1.418e-05	0.1639	0.03745	0.85814	rs12460492	11	RPL28	0	intronic	0.915	5	2	5	1	0	1
rs74718140	14	46018843	T	G	0.129	0.0003685	0.1369	0.03821	0.620742	rs370396655	7	RP11-945F5.1	18354	intergenic	0.885	6	15	15	0	1	1
rs7984080	13	91527194	G	A	0.06845	0.0004216	0.1338	0.03775	0.662116	rs138481477	5	LINC00410	16013	intergenic	0.873	5	5	15	0	0	1
rs7141702	14	45883154	G	A	0.09623	0.0003025	0.1358	0.03737	0.804909	rs370396655	7	RP11-454K7.1	24664	intergenic	0.839	7	9	15	0	1	1
rs141233275	19	55910524	TTTTTCTTTTCTTTTC	T	0.05159	1.442e-05	0.1636	0.03742	0.85814	rs12460492	11	RPL28	0	intronic	0.839	NA	2	5	1	0	1
rs4321830	6	100188491	G	A	0.05258	NA	NA	NA	1	rs4240581	4	Y_RNA	98267	intergenic	0.814	6	13	14	0	1	1
rs28454071	19	55909271	T	C	0.05159	1.418e-05	0.1639	0.03745	0.85814	rs12460492	11	RPL28	0	intronic	0.782	5	2	5	1	0	1
rs10133748	14	45988352	C	G	0.125	0.0003738	0.1358	0.03794	0.620784	rs370396655	7	RP11-454K7.2	16008	intergenic	0.768	6	9	15	0	1	1
13:91517838	13	91517838	C	CCTT	0.0625	0.0003998	0.134	0.03764	0.765402	rs138481477	5	LINC00410	25369	intergenic	0.758	NA	5	15	0	0	1
rs7981911	13	91591464	C	T	0.07044	0.002025	0.1171	0.03779	0.616172	rs138481477	5	LINC00410	12612	intergenic	0.756	7	5	15	0	0	1
rs12977341	19	55909710	C	A	0.05159	1.418e-05	0.1639	0.03745	0.85814	rs12460492	11	RPL28	0	intronic	0.756	2b	1	5	1	0	1
rs10141214	14	45943003	G	A	0.09821	3.863e-05	0.1546	0.03729	0.852712	rs370396655	7	RP11-454K7.2	28941	intergenic	0.742	6	9	15	0	1	1
rs9583181	13	108249040	G	T	0.08036	5.915e-06	0.1704	0.0373	0.986515	rs957788	6	FAM155A	0	intronic	0.698	6	5	15	1	0	1
rs67505584	14	45913322	G	A	0.09425	0.0003025	0.1358	0.03737	0.824616	rs370396655	7	RP11-454K7.1	54832	intergenic	0.681	5	8	15	0	1	1
14:46009018	14	46009018	C	CTCT	0.124	0.0002806	0.1394	0.03815	0.626704	rs370396655	7	RP11-945F5.1	28179	intergenic	0.626	NA	9	15	0	0	1
rs112806508	14	45853472	G	A	0.07143	0.002919	0.1122	0.03757	0.617906	rs370396655	7	RP11-454K7.1	0	ncRNA_intronic	0.612	6	9	15	1	1	1
rs7235339	18	32394342	T	G	0.04464	0.0002325	0.1393	0.03763	0.835696	rs511638	9	DTNA	0	intronic	0.603	6	5	15	1	1	1
rs16944850	13	91512080	A	G	0.0625	0.0003355	0.1353	0.03752	0.765402	rs138481477	5	LINC00410	31127	intergenic	0.601	5	5	15	0	0	1
rs34575738	14	45887213	A	AC	0.09325	0.000174	0.141	0.03735	0.834765	rs370396655	7	RP11-454K7.1	28723	intergenic	0.581	NA	9	15	0	1	1
rs1957401	14	45868990	T	C	0.09425	0.0004039	0.1346	0.03783	0.783261	rs370396655	7	RP11-454K7.1	10500	intergenic	0.54	NA	5	15	0	1	1
rs149829131	14	45885203	C	G	0.09325	0.000174	0.141	0.03735	0.834765	rs370396655	7	RP11-454K7.1	26713	intergenic	0.532	7	9	15	0	1	1
rs3774617	3	53878042	C	T	0.2163	0.0001899	0.1404	0.0374	0.716567	rs61124991	2	CHDH	0	intronic	0.52	2a	1	7	1	0	1
rs11624438	14	45907222	A	C	0.09623	0.0003025	0.1358	0.03737	0.804909	rs370396655	7	RP11-454K7.1	48732	intergenic	0.495	6	15	15	0	1	1
rs140740177	18	32450167	TG	T	0.03373	NA	NA	NA	0.698923	rs511638	9	DTNA	0	intronic	0.474	NA	5	15	1	0	1
rs148520042	14	46019524	C	A	0.128	0.0003685	0.1369	0.03821	0.626412	rs370396655	7	RP11-945F5.1	17673	intergenic	0.468	7	15	15	0	0	1
rs1790539	18	32432682	T	C	0.04663	2.11e-05	0.1596	0.03725	0.959009	rs511638	9	DTNA	0	intronic	0.462	7	4	15	1	1	1
rs138663983	6	100122855	G	A	0.04167	NA	NA	NA	0.742283	rs4240581	4	Y_RNA	32631	intergenic	0.442	7	14	15	0	0	1
rs200110986	14	46015439	G	C	0.123	0.0003184	0.1381	0.03814	0.632712	rs370396655	7	RP11-945F5.1	21758	intergenic	0.422	6	15	15	0	1	1
rs11622664	14	45853153	A	G	0.0744	0.003831	0.1093	0.03765	0.609814	rs370396655	7	RP11-454K7.1	0	ncRNA_intronic	0.404	3a	9	15	1	1	1
rs750153	14	45995332	T	C	0.128	0.000283	0.1388	0.03802	0.626412	rs370396655	7	RP11-454K7.2	22988	intergenic	0.403	NA	9	15	0	1	1
rs2415888	14	45994633	G	A	0.128	0.0002353	0.1409	0.03808	0.626412	rs370396655	7	RP11-454K7.2	22289	intergenic	0.364	6	9	15	0	1	1
rs74044147	14	45926869	C	T	0.09226	7.037e-05	0.1494	0.03732	0.84512	rs370396655	7	RP11-454K7.2	45075	intergenic	0.358	6	9	15	0	1	1
rs150601119	17	14319358	CCTTT	C	0.1071	0.03629	0.08256	0.03934	0.644892	rs12600375	8	AC022816.2	0	ncRNA_intronic	0.344	NA	5	15	1	0	1
rs72672970	14	45844285	G	A	0.07143	0.002616	0.1134	0.03754	0.617906	rs370396655	7	RP11-454K7.1	2185	intergenic	0.336	6	5	15	1	1	1
rs60525205	14	45955349	T	C	0.09921	4.085e-05	0.1541	0.0373	0.842879	rs370396655	7	RP11-454K7.2	16595	intergenic	0.308	7	9	15	0	1	1
rs74044156	14	45943335	A	G	0.09524	1.959e-05	0.1604	0.03727	0.883366	rs370396655	7	RP11-454K7.2	28609	intergenic	0.305	6	9	15	0	1	1
rs2210145	14	45845149	G	A	0.07143	0.001927	0.1169	0.03754	0.617906	rs370396655	7	RP11-454K7.1	1321	intergenic	0.297	NA	5	15	1	1	1
rs112783265	18	32358907	A	G	0.04861	0.001109	0.1233	0.03762	0.730821	rs511638	9	DTNA	0	intronic	0.288	6	5	15	1	0	1
rs76991362	14	45916385	T	A	0.08135	0.0005421	0.13	0.03739	0.68436	rs370396655	7	RP11-454K7.2	55559	intergenic	0.28	6	9	15	0	1	1
rs13343706	19	55911144	C	G	0.0506	1.442e-05	0.1636	0.03742	0.834413	rs12460492	11	RPL28:CTD-2105E13.13	0:0	ncRNA_exonic	0.234	4	2	5	1	0	1
rs55748252	18	32440171	C	T	0.03373	NA	NA	NA	0.698923	rs511638	9	DTNA	0	intronic	0.22	7	1	5	1	0	1
rs9321706	6	100193412	A	C	0.05258	NA	NA	NA	1	rs4240581	4	Y_RNA	103188	intergenic	0.18	7	2	14	0	1	1
rs28411209	19	55910078	C	T	0.0506	1.418e-05	0.1639	0.03745	0.834413	rs12460492	11	RPL28	0	intronic	0.161	5	1	5	1	0	1
rs7336849	13	108230531	G	A	0.07639	NA	NA	NA	0.959357	rs957788	6	FAM155A	0	intronic	0.159	6	5	15	1	0	1
rs1786597	18	32400516	G	T	0.04464	4.704e-05	0.1528	0.03728	0.835696	rs511638	9	DTNA	0	intronic	0.138	1d	1	15	1	1	1
rs3216116	18	32407241	CA	C	0.04464	4.704e-05	0.1528	0.03728	0.835696	rs511638	9	DTNA	0	intronic	0.13	NA	4	15	1	1	1
rs11628895	14	45921618	G	C	0.09127	0.0002035	0.1402	0.03751	0.855686	rs370396655	7	RP11-454K7.2	50326	intergenic	0.122	6	8	15	0	1	1
rs113713892	14	45980550	G	A	0.09226	2.207e-05	0.1596	0.03734	0.890144	rs370396655	7	RP11-454K7.2	8206	intergenic	0.121	7	9	15	1	1	1
rs17657006	14	45909309	G	A	0.09325	0.000174	0.141	0.03735	0.834765	rs370396655	7	RP11-454K7.1	50819	intergenic	0.1	7	9	15	0	1	1
rs12600375	17	14304130	G	A	0.08234	1.881e-06	0.1864	0.0387	1	rs12600375	8	AC022816.2	0	ncRNA_intronic	0.093	6	4	15	1	0	1
rs55703670	14	45910695	G	A	0.09325	0.000174	0.141	0.03735	0.834765	rs370396655	7	RP11-454K7.1	52205	intergenic	0.087	7	9	15	0	1	1
rs12617655	2	172749260	G	A	0.06052	0.0003157	0.1363	0.03764	0.931185	rs145640663	1	SLC25A12	0	intronic	0.066	6	1	5	1	0	1
rs9587408	13	108248045	T	C	0.07937	5.071e-06	0.1708	0.03713	1	rs957788	6	FAM155A	0	intronic	0.044	6	5	15	1	0	1
rs201869979	19	55907636	TA	T	0.05357	4.356e-06	0.1743	0.0376	0.823987	rs12460492	11	RPL28	0	intronic	0.04	NA	5	5	1	0	1
rs35811057	21	35822110	C	T	0.09722	0.0001246	0.1459	0.03779	0.8681	rs13050198	12	KCNE1	0	intronic	0.022	6	4	15	1	0	1
rs60223040	18	32365609	G	A	0.04861	0.0009148	0.1254	0.03764	0.730821	rs511638	9	DTNA	0	intronic	0.02	6	5	15	1	0	1
rs12590750	14	45942769	T	A	0.09524	1.959e-05	0.1604	0.03727	0.883366	rs370396655	7	RP11-454K7.2	29175	intergenic	0.019	6	9	15	0	1	1
rs1790533	18	32411595	A	G	0.04464	4.855e-05	0.1527	0.03734	0.835696	rs511638	9	DTNA	0	intronic	0.015	NA	4	15	1	1	1

## Sheet: Table S8
Supplementary Table S8. Summary statistics table of associated eQTL rs62132778 according to QTLbase.
eQTL = GWAS SNP linked to gene via expression quantitative trait locus mapping, NA= not available; xQTL: genomic locus (e.g., a genetic variant) that explains all or a fraction of variation in certain molecular trait (no matter which trait) is referred to as xQTL; PVAL=study original P-value (filter <0.1); Effect size = beta, or t-statistic, or chi-squared statistic, or odds ratio, or LOD score; …
Trait	CHR	START	END	Effective_Allele	tissue	Tissue_State	xqtl	Effect_Size	Effect_Size_Desc	SE	SE_Desc	PVAL	FDR	PMID	Journal	year	Platform	Population	Sample_Size
ZNF114	19	48773338	48790865	NA	Kidney	nephrotic syndrome	eQTL	-0.281711	beta	0.142256	Original reported SE	0.0505	NA	30057032	American journal of human genetics	2018	Affymetrix 2.1 ST chips	MIX	136
BCAT2	19	49298319	49314286	NA	Kidney	nephrotic syndrome	eQTL	0.377859	beta	0.178953	Original reported SE	0.0373	NA	30057032	American journal of human genetics	2018	Affymetrix 2.1 ST chips	MIX	136
RUVBL2	19	49496819	49519227	NA	Kidney	nephrotic syndrome	eQTL	-0.21706	beta	0.116616	Original reported SE	0.0649	NA	30057032	American journal of human genetics	2018	Affymetrix 2.1 ST chips	MIX	166
RUVBL2	19	49496819	49519227	NA	Kidney	nephrotic syndrome	eQTL	-0.401246	beta	0.130948	Original reported SE	0.00283	NA	30057032	American journal of human genetics	2018	Affymetrix 2.1 ST chips	MIX	136
RASIP1	19	49223842	49243867	C	Fibroblast	normal	eQTL	-0.543876	beta	0.11349	Original reported SE	2.84e-06	NA	25954001	Science	2015	Illumina HiSeq 2000	EUR	300
NOP53	19	48248803	48260315	NA	Brain	normal	eQTL	0.152577	beta	0.0534824	Estimated SE	0.00534	0.886	30224808	Nature neuroscience	2018	Illumina HiSeq 2000 and 2500	MIX	93
NOSIP	19	50058968	50093519	NA	Lymphocyte	control buffer	eQTL	0.445634	beta	0.146347	Estimated SE	0.00274	NA	32787775	BMC Genomics	2020	null	AFR	153
SCAF1	19	50145466	50161899	C	Thyroid Gland	Thyroid	eQTL	0.13957	beta	0.067026	Original reported SE	0.0393	NA	32913072	Science	2020	null	EUR	574
SULT2B1	19	49055332	49102682	NA	Kidney	nephrotic syndrome	eQTL	-0.251912	beta	0.118953	Original reported SE	0.0361	NA	30057032	American journal of human genetics	2018	Affymetrix 2.1 ST chips	MIX	166
IZUMO1	19	49244109	49250166	C	Adipose-Subcutaneous	normal	eQTL	-0.435815	beta	0.0903053	Original reported SE	2.17e-06	NA	25954001	Science	2015	Illumina HiSeq 2000	EUR	385
IZUMO1	19	49244109	49250166	C	Adipose-Visceral	normal	eQTL	-0.404362	beta	0.0833872	Original reported SE	2.13e-06	NA	25954001	Science	2015	Illumina HiSeq 2000	EUR	313
IZUMO1	19	49244109	49250166	C	Esophagus	normal	eQTL	-0.541889	beta	0.0947762	Original reported SE	2.68e-08	NA	25954001	Science	2015	Illumina HiSeq 2000	EUR	358
IZUMO1	19	49244109	49250166	NA	Kidney	nephrotic syndrome	eQTL	-0.366774	beta	0.172435	Original reported SE	0.036	NA	30057032	American journal of human genetics	2018	Affymetrix 2.1 ST chips	MIX	136
IZUMO1	19	49244109	49250166	C	Lung	normal	eQTL	-0.44004	beta	0.0662728	Original reported SE	1.37e-10	NA	25954001	Science	2015	Illumina HiSeq 2000	EUR	383
IZUMO1	19	49244109	49250166	C	Muscle-Skeletal	normal	eQTL	-0.399621	beta	0.0884341	Original reported SE	8.07e-06	NA	25954001	Science	2015	Illumina HiSeq 2000	EUR	491
IZUMO1	19	49244109	49250166	C	Skin	normal	eQTL	-0.436272	beta	0.0991262	Original reported SE	1.44e-05	NA	25954001	Science	2015	Illumina HiSeq 2000	EUR	414
IZUMO1	19	49244109	49250166	C	Spleen	normal	eQTL	-0.679188	beta	0.135577	Original reported SE	1.83e-06	NA	25954001	Science	2015	Illumina HiSeq 2000	EUR	146
IZUMO1	19	49244109	49250166	C	Stomach	normal	eQTL	-0.392141	beta	0.081	Original reported SE	2.58e-06	NA	25954001	Science	2015	Illumina HiSeq 2000	EUR	237
IZUMO1	19	49244109	49250166	C	Thyroid Gland	normal	eQTL	-0.47758	beta	0.0955797	Original reported SE	9.45e-07	NA	25954001	Science	2015	Illumina HiSeq 2000	EUR	399
FUT2	19	49199228	49209207	C	Artery-Aorta	normal	eQTL	0.345283	beta	0.0771912	Original reported SE	1.25e-05	NA	25954001	Science	2015	Illumina HiSeq 2000	EUR	267
FUT2	19	49199228	49209207	C	Brain-Hippocampus	normal	eQTL	-0.239043	beta	0.0518095	Estimated SE	6.18e-06	0.00132	32203495	Nature Neuroscience	2020	null	MIX	263
FUT2	19	49199228	49209207	C	Esophagus	normal	eQTL	0.290763	beta	0.0655589	Original reported SE	1.31e-05	NA	25954001	Science	2015	Illumina HiSeq 2000	EUR	358
FUT2	19	49199228	49209207	NA	Large Intestine-Colon	colon tumours and normal	eQTL	44.9884	beta	8.72222	Estimated SE	8.12e-07	0.00081	30283144	British journal of cancer	2018	Affymetrix Human Genome U219 ArrayPlate	MIX	144
SEC1P	19	49141328	49185502	C	Skin	normal	eQTL	-0.481213	beta	0.0903287	Original reported SE	1.8e-07	NA	25954001	Science	2015	Illumina HiSeq 2000	EUR	414
MAMSTR	19	49215982	49222982	C	Muscle-Skeletal	normal	eQTL	-0.150672	beta	0.0297988	Original reported SE	6.37e-07	NA	25954001	Science	2015	Illumina HiSeq 2000	EUR	491
NTN5	19	49164664	49176338	NA	Brain	normal	eQTL	-0.115141	beta	0.029417	Estimated SE	9.4e-05	0.00798	30545857	Science	2018	RNA-seq	MIX	1866
NTN5	19	49164664	49176338	C	Brain-Cerebellum	normal	eQTL	-0.547795	beta	0.122604	Original reported SE	1.83e-05	NA	25954001	Science	2015	Illumina HiSeq 2000	EUR	154
NTN5	19	49164664	49176338	C	Esophagus	normal	eQTL	-0.281778	beta	0.0639916	Original reported SE	1.51e-05	NA	25954001	Science	2015	Illumina HiSeq 2000	EUR	335
NTN5	19	49164664	49176338	NA	Kidney	nephrotic syndrome	eQTL	0.375194	beta	0.16205	Original reported SE	0.0227	NA	30057032	American journal of human genetics	2018	Affymetrix 2.1 ST chips	MIX	136
NTN5	19	49164664	49176338	C	Skin	normal	eQTL	-0.315036	beta	0.0592052	Original reported SE	1.85e-07	NA	25954001	Science	2015	Illumina HiSeq 2000	EUR	414
NTN5	19	49164664	49176338	C	Thyroid Gland	normal	eQTL	-0.216495	beta	0.0510385	Original reported SE	2.88e-05	NA	25954001	Science	2015	Illumina HiSeq 2000	EUR	399
SYNGR4	19	48867652	48879633	NA	Kidney	nephrotic syndrome	eQTL	-0.254267	beta	0.131141	Original reported SE	0.0546	NA	30057032	American journal of human genetics	2018	Affymetrix 2.1 ST chips	MIX	166

## Sheet: Table S9
Supplementary Table S9. Schistosomiasis aspartate transaminase susceptibility functional candidate genes identified via SMR analysis
Genes formatted in bold: decreased gene expression linked to increased risk of elevated serum levels of AST. Genes not in bold: increased gene expression linked to increased risk of elevated serum levels of AST. Columns: Tissue; Probe ID; Probe chromosome; Gene, gene name; Probe_bp, probe position; topSNP, SNP ID; topSNP_bp, top eQTL position; A1, effect allele; A2, alternative allele; Freq, freq…
Tissue	probeID	ProbeChr	Gene	Probe_bp	topSNP	topSNP_chr	topSNP_bp	A1	A2	Freq	b_GWAS	se_GWAS	p_GWAS	b_eQTL	se_eQTL	p_eQTL	b_SMR	se_SMR	p_SMR	p_HEIDI	nsnp_HEIDI
Muscle_Skeletal.v8	ENSG00000176909.11	19	MAMSTR	48712742	rs62132778	19	48731367	C	G	0.175595	0.1961	0.03709	1.72e-07	-0.166057	0.0261385	2.11191e-10	-1.18092	0.290588	4.82603e-05
Brain_Cerebellum.v8	ENSG00000142233.11	19	NTN5	48661407	rs62132778	19	48731367	C	G	0.175595	0.1961	0.03709	1.72e-07	-0.613686	0.10859	1.59164e-08	-0.319545	0.0827638	0.00011296
Muscle_Skeletal.v8	ENSG00000156113.22	10	KCNMA1	76869601	rs816850	10	77492688	C	G	0.188492	-0.1506	0.03763	7.063e-05	-0.270136	0.0295157	5.57484e-20	0.557497	0.152036	0.000245537	0.193394	16
Testis.v8	ENSG00000250754.5	4	RP11-386B13.3	185051896	rs11730693	4	185033687	G	C	0.526786	0.1545	0.039	8.426e-05	0.294349	0.033146	6.66402e-19	0.524887	0.145082	0.000297035	0.000975221	15
Skin_Not_Sun_Exposed_Suprapubic.v8	ENSG00000120341.18	1	SEC16B	177923956	rs570762	1	177921018	C	T	0.331349	-0.1654	0.03783	1.45e-05	-0.210193	0.0334197	3.18498e-10	0.786896	0.219192	0.000330695	0.0039905	5
Cells_Cultured_fibroblasts.v8	ENSG00000137364.4	6	TPMT	18128311	rs35237970	6	18142077	G	A	0.395833	0.1414	0.03855	0.0002648	0.278154	0.0268491	3.77412e-25	0.508352	0.147022	0.00054492	0.000822145	14
Esophagus_Mucosa.v8	ENSG00000120341.18	1	SEC16B	177923956	rs570762	1	177921018	C	T	0.331349	-0.1654	0.03783	1.45e-05	-0.153111	0.0280597	4.85322e-08	1.08026	0.316607	0.000644881
Thyroid.v8	ENSG00000144815.15	3	NXPE3	101779202	rs73143813	3	101754796	A	G	0.201389	0.1364	0.03763	0.0003139	-0.687954	0.0684598	9.27863e-24	-0.198269	0.0581481	0.000650278	0.256694	9
Lung.v8	ENSG00000137364.4	6	TPMT	18128311	rs35237970	6	18142077	G	A	0.395833	0.1414	0.03855	0.0002648	0.246788	0.0304036	4.77569e-16	0.572961	0.171415	0.000830166	0.00203971	6
Cells_Cultured_fibroblasts.v8	ENSG00000260046.1	14	RP11-454K7.3	45369215	rs137910642	14	45502916	GTGTTTGAGTTTTCAATGACA	G	0.0952381	0.1564	0.03733	3.19e-05	-0.398932	0.0723003	3.43443e-08	-0.392047	0.117493	0.000847624	0.865955	8
Cells_Cultured_fibroblasts.v8	ENSG00000144815.15	3	NXPE3	101779202	rs4377474	3	101701059	A	G	0.195437	0.1291	0.03758	0.0006337	-0.762487	0.0587578	1.65713e-38	-0.169314	0.0509839	0.00089715	0.156315	15
Spleen.v8	ENSG00000122678.16	7	POLM	44072247	rs62458756	7	44065740	A	G	0.0654762	0.1394	0.03774	0.0002406	-0.502181	0.0692376	4.076e-13	-0.277589	0.0843363	0.000996709	0.322634	20
Skin_Sun_Exposed_Lower_leg.v8	ENSG00000089250.18	12	NOS1	117208142	rs4766845	12	117349749	T	G	0.405754	0.1252	0.03749	0.0008854	-0.84595	0.0439801	1.89193e-82	-0.147999	0.04498	0.00100069	0.330454	15
Esophagus_Muscularis.v8	ENSG00000137364.4	6	TPMT	18128311	rs35237970	6	18142077	G	A	0.395833	0.1414	0.03855	0.0002648	0.298677	0.0406775	2.09543e-13	0.473421	0.144278	0.00103323	0.000135222	7

## Sheet: Table S10
Supplementary Table S10. SNPs in the genomic loci associated with schistosomiasis serum levels of albumin in GWAS analysis of 637 independent individuals.
Note: Associated genomic loci were defined by all SNPs in LD (r2>0.6) with an independent significant (P < 1e-5) SNP. CADD: Combined Annotation Dependent Depletion score; RDB: Regulome DB score; MAF: effect allele frequency; MAF: Regression coefficient.
rsID	chr	pos	non_effect_allele	effect_allele	MAF	gwasP	beta	se	r2	IndSigSNP	GenomicLocus	nearestGene	dist	func	CADD	RDB	minChrState	commonChrState	posMapFilt	eqtlMapFilt	ciMapFilt
rs11693809	2	11890138	T	C	0.1944	2.794e-05	-0.1494	0.03539	0.613443	rs4129758	1	LPIN1	0	intronic	1.975	2b	1	7	1	1	1
rs10192566	2	11890428	C	G	0.1944	1.795e-05	-0.1529	0.03536	0.613443	rs4129758	1	LPIN1	0	intronic	2.669	4	1	7	1	1	1
rs10207506	2	11890764	T	C	0.1935	8.775e-06	-0.1584	0.03533	0.617622	rs4129758	1	LPIN1	0	intronic	4.685	4	1	7	1	0	1
rs111706198	2	11890932	T	TAGAC	0.1935	1.52e-05	-0.1543	0.03538	0.617622	rs4129758	1	LPIN1	0	intronic	2.87	NA	1	7	1	0	1
rs77022846	2	11891416	T	TGG	0.1935	2.036e-05	-0.1521	0.03541	0.617622	rs4129758	1	LPIN1	0	intronic	10.94	NA	2	5	1	1	1
rs4315495	2	11892190	G	A	0.1925	2.211e-05	-0.1512	0.03536	0.609925	rs4129758	1	LPIN1	0	intronic	0.874	6	5	5	1	1	1
2:11892609	2	11892609	G	GT	0.1944	1.367e-05	-0.1551	0.03536	0.605359	rs4129758	1	LPIN1	0	intronic	0.564	NA	5	5	1	0	1
rs10199492	2	11892714	C	T	0.1935	1.277e-05	-0.1553	0.03529	0.605758	rs4129758	1	LPIN1	0	intronic	2.135	7	5	5	1	0	1
rs10166887	2	11892761	T	G	0.1935	1.277e-05	-0.1553	0.03529	0.605758	rs4129758	1	LPIN1	0	intronic	3.887	7	5	5	1	0	1
rs11676086	2	11892997	T	C	0.1944	2.419e-05	-0.1512	0.03552	0.605359	rs4129758	1	LPIN1	0	intronic	0.016	5	5	5	1	1	1
rs10169802	2	11893213	T	C	0.1944	2.791e-05	-0.15	0.03552	0.605359	rs4129758	1	LPIN1	0	intronic	0.677	4	2	7	1	1	1
rs140953177	2	11893332	G	GGGCTTTGGT	0.1944	1.365e-05	-0.1553	0.03541	0.613443	rs4129758	1	LPIN1	0	intronic	8.721	NA	2	7	1	0	1
rs7595221	2	11896975	G	A	0.1915	3.06e-05	-0.1485	0.03535	0.606002	rs4129758	1	LPIN1	0	intronic	0.026	7	4	5	1	1	1
rs13407101	2	11901856	G	A	0.1925	1.543e-05	-0.1535	0.03524	0.625492	rs4129758	1	LPIN1	0	intronic	1.28	7	4	5	1	1	1
rs11892204	2	11903854	A	T	0.1944	1.811e-05	-0.154	0.03564	0.617133	rs4129758	1	LPIN1	0	intronic	0.765	5	4	5	1	1	1
rs11897144	2	11903855	G	C	0.1944	1.811e-05	-0.154	0.03564	0.617133	rs4129758	1	LPIN1	0	intronic	1.007	5	4	5	1	1	1
rs35249080	2	11903980	G	GTCC	0.1935	2.615e-05	-0.1499	0.03537	0.621294	rs4129758	1	LPIN1	0	intronic	2.056	NA	4	5	1	1	1
rs72773994	2	11904142	G	A	0.1935	1.543e-05	-0.1535	0.03524	0.621294	rs4129758	1	LPIN1	0	intronic	6.457	6	4	5	1	1	1
rs893342	2	11904486	T	C	0.1925	1.965e-05	-0.1522	0.03538	0.601864	rs4129758	1	LPIN1	0	intronic	0.098	4	4	5	1	1	1
rs1006538	2	11905317	T	C	0.1915	1.632e-05	-0.153	0.03521	0.606002	rs4129758	1	LPIN1	0	intronic	2.748	5	4	5	1	0	1
rs10209969	2	11905876	C	T	0.1915	1.634e-05	-0.153	0.03521	0.606002	rs4129758	1	LPIN1	0	intronic	1.424	6	4	4	1	1	1
rs4027156	2	11913058	CTCTA	C	0.1935	1.881e-05	-0.1509	0.035	0.621294	rs4129758	1	LPIN1	0	intronic	0.467	NA	4	4	1	1	1
rs2358041	2	11913245	C	T	0.1925	1.541e-05	-0.1522	0.03494	0.625492	rs4129758	1	LPIN1	0	intronic	2.417	6	4	4	1	1	1
rs2358042	2	11913438	C	T	0.1925	1.05e-05	-0.1548	0.03485	0.625492	rs4129758	1	LPIN1	0	intronic	0.037	5	4	4	1	1	1
rs13412852	2	11914941	C	T	0.1935	1.173e-05	-0.1538	0.03481	0.621294	rs4129758	1	LPIN1	0	intronic	0.391	5	4	4	1	1	1
rs10205312	2	11915221	A	T	0.1944	1.88e-05	-0.1508	0.03497	0.617133	rs4129758	1	LPIN1	0	intronic	3.681	6	2	5	1	1	1
rs10205400	2	11915284	A	C	0.1944	2.527e-05	-0.1485	0.03499	0.617133	rs4129758	1	LPIN1	0	intronic	0.619	7	2	5	1	1	1
rs6717910	2	11917278	T	C	0.1944	1.677e-05	-0.155	0.03571	0.637419	rs4129758	1	LPIN1	0	intronic	4.036	5	4	5	1	1	1
rs1469952	2	11917519	G	A	0.1935	2.028e-05	-0.1534	0.03571	0.641697	rs4129758	1	LPIN1	0	UTR5	0.24	2b	4	5	1	1	1
rs2278513	2	11917905	T	C	0.1935	1.84e-05	-0.1541	0.03569	0.641697	rs4129758	1	LPIN1	0	intronic	0.876	2c	4	5	1	1	1
rs112852830	2	11918264	G	GT	0.1935	2.263e-05	-0.1528	0.03578	0.641697	rs4129758	1	LPIN1	0	intronic	1.268	NA	2	5	1	1	1
rs76885618	2	11918270	G	C	0.1825	NA	NA	NA	0.620712	rs4129758	1	LPIN1	0	intronic	0.064	5	2	5	1	1	1
rs2289193	2	11919498	G	A	0.1389	1.732e-05	-0.1529	0.03529	0.933371	rs4129758	1	LPIN1	0	intronic	12.36	2a	1	5	1	0	1
rs2358125	2	11920199	G	C	0.1429	9.327e-06	-0.158	0.03535	0.918346	rs4129758	1	LPIN1	0	intronic	1.337	7	4	5	1	0	1
rs7587836	2	11922855	A	G	0.1369	7.213e-06	-0.1601	0.03536	1	rs4129758	1	LPIN1	0	intronic	5.4	3a	4	4	1	1	1
rs17603197	2	11922987	C	T	0.1369	4.275e-06	-0.1635	0.03524	1	rs4129758	1	LPIN1	0	intronic	0.023	4	4	4	1	0	1
rs4129758	2	11923408	A	G	0.1369	4.275e-06	-0.1635	0.03524	1	rs4129758	1	LPIN1	0	intronic	1.73	NA	4	4	1	0	1
rs4129757	2	11923418	A	G	0.1935	2.505e-05	-0.1526	0.03593	0.657441	rs4129758	1	LPIN1	0	intronic	0.401	NA	4	4	1	1	1
rs3762583	2	11924293	G	A	0.1448	5.691e-06	-0.1634	0.03568	0.903165	rs4129758	1	LPIN1	0	intronic	0.02	6	4	4	1	1	1
rs11695081	2	11925782	C	T	0.1111	5.315e-06	-0.1634	0.03556	0.741336	rs4129758	1	LPIN1	0	intronic	1.9	2b	4	4	1	0	1
rs11694797	2	11925891	T	G	0.1369	3.047e-05	-0.1489	0.03544	0.983082	rs4129758	1	LPIN1	0	intronic	1.956	5	4	4	1	1	1
rs62113359	2	11927692	C	T	0.1369	1.385e-05	-0.1556	0.0355	0.983082	rs4129758	1	LPIN1	0	intronic	0.834	5	4	4	1	0	1
rs6757892	2	11929399	G	A	0.1925	0.000187	-0.1364	0.03627	0.653155	rs4129758	1	LPIN1	0	intronic	1.213	2b	4	4	1	1	1
rs62114960	2	11929464	T	C	0.1369	1.379e-05	-0.1561	0.03561	0.983082	rs4129758	1	LPIN1	0	intronic	4.073	4	2	4	1	0	1
rs17603420	2	11929740	G	A	0.1915	0.0001366	-0.1391	0.03622	0.65747	rs4129758	1	LPIN1	0	intronic	4.778	4	2	4	1	1	1
rs2358126	2	11930279	A	G	0.1925	6.57e-05	-0.146	0.03631	0.653155	rs4129758	1	LPIN1	0	intronic	2.498	1f	4	4	1	1	1
rs11679358	2	11931498	A	G	0.1369	2.202e-05	-0.1526	0.03567	0.983082	rs4129758	1	LPIN1	0	intronic	7.156	6	4	4	1	0	1
rs78343196	2	11931931	A	AT	0.1349	5.105e-05	-0.1473	0.03609	0.965671	rs4129758	1	LPIN1	0	intronic	10.26	NA	4	4	1	0	1
rs7561070	2	11932173	G	T	0.1925	NA	NA	NA	0.653155	rs4129758	1	LPIN1	0	intronic	0.322	7	4	4	1	1	1
rs7607755	2	11932335	T	C	0.1935	NA	NA	NA	0.648878	rs4129758	1	LPIN1	0	intronic	0.661	5	4	4	1	1	1
rs10520097	2	11933386	A	G	0.1369	1.56e-05	-0.1558	0.03577	0.983082	rs4129758	1	LPIN1	0	intronic	0.056	5	4	4	1	0	1
rs1446505	2	168814408	T	C	0.255	4.991e-05	-0.142	0.03477	0.836525	rs77391674	2	STK39	0	intronic	4.609	NA	4	5	1	0	1
rs59087209	2	168815659	C	T	0.2202	1.067e-05	-0.1543	0.03475	0.962761	rs77391674	2	STK39	0	intronic	4.604	5	4	5	1	0	1
rs10201928	2	168816526	C	T	0.2708	0.0009408	-0.1169	0.03518	0.767172	rs77391674	2	STK39	0	intronic	0.443	6	4	5	1	0	1
rs76678524	2	168817899	A	C	0.2202	8.564e-06	-0.1561	0.03479	0.994646	rs77391674	2	STK39	0	intronic	12.63	5	4	5	1	0	1
rs12692866	2	168820046	A	ACAC	0.2034	1.349e-05	-0.1545	0.03521	0.916759	rs77391674	2	STK39	0	intronic	0.396	NA	4	5	1	0	1
rs3213942	2	168821469	T	C	0.2202	7.623e-06	-0.1572	0.03483	0.994646	rs77391674	2	STK39	0	intronic	1.547	NA	4	5	1	0	1
rs77391674	2	168822415	T	C	0.2192	7.623e-06	-0.1572	0.03483	1	rs77391674	2	STK39	0	intronic	12.7	7	4	5	1	0	1
rs7604572	2	168823532	C	T	0.2173	1.008e-05	-0.155	0.03481	0.989317	rs77391674	2	STK39	0	intronic	11.74	5	2	5	1	0	1
rs139173853	2	168824350	CT	C	0.2143	1.02e-05	-0.1552	0.03488	0.973531	rs77391674	2	STK39	0	intronic	0.904	NA	1	5	1	0	1
rs61097286	2	168826266	T	C	0.2202	1.842e-05	-0.1513	0.03504	0.994646	rs77391674	2	STK39	0	intronic	3.866	7	4	5	1	0	1
rs7579964	2	168826850	T	C	0.3016	0.005341	-0.0984	0.0352	0.664706	rs77391674	2	STK39	0	intronic	0.478	7	5	5	1	1	1
rs59726340	2	168827329	T	C	0.2202	1.842e-05	-0.1513	0.03504	0.994646	rs77391674	2	STK39	0	intronic	0.508	6	5	5	1	0	1
rs6730927	2	168827478	T	C	0.2748	0.001851	-0.1102	0.03525	0.747026	rs77391674	2	STK39	0	intronic	0.098	5	5	5	1	0	1
rs143195103	2	168831159	CTG	C	0.2143	2.468e-05	-0.1491	0.03507	0.973531	rs77391674	2	STK39	0	intronic	0.872	NA	5	5	1	0	1
rs2390624	2	168832719	A	T	0.246	0.0001928	-0.1318	0.03513	0.827749	rs77391674	2	STK39	0	intronic	1.301	7	5	5	1	1	1
rs6718279	2	168833081	G	A	0.2153	1.842e-05	-0.1513	0.03504	0.978762	rs77391674	2	STK39	0	intronic	8.075	7	4	5	1	0	1
rs6730946	2	168836471	G	A	0.2143	4.187e-05	-0.1445	0.03501	0.962937	rs77391674	2	STK39	0	intronic	0.83	7	4	5	1	0	1
rs138961997	2	168837387	TTTC	T	0.2143	4.187e-05	-0.1445	0.03501	0.962937	rs77391674	2	STK39	0	intronic	1.22	NA	4	5	1	0	1
rs4578820	2	168837768	C	A	0.2937	0.005427	-0.09826	0.03521	0.646042	rs77391674	2	STK39	0	intronic	0.132	6	4	5	1	1	1
rs75807146	2	168837878	T	A	0.2143	4.187e-05	-0.1445	0.03501	0.962937	rs77391674	2	STK39	0	intronic	4.75	6	4	5	1	0	1
rs116483692	2	168839792	C	A	0.2143	4.187e-05	-0.1445	0.03501	0.962937	rs77391674	2	STK39	0	intronic	1.074	7	4	5	1	0	1
rs74474528	2	168840402	G	T	0.2173	4.233e-05	-0.1447	0.03508	0.978649	rs77391674	2	STK39	0	intronic	3.627	6	4	5	1	0	1
rs10187864	2	168841840	C	T	0.247	0.0004082	-0.1252	0.03522	0.841193	rs77391674	2	STK39	0	intronic	7.987	6	4	5	1	1	1
rs77024984	2	168842143	G	A	0.2143	4.187e-05	-0.1445	0.03501	0.962937	rs77391674	2	STK39	0	intronic	6.885	7	4	5	1	0	1
rs4667989	2	168842510	C	T	0.244	0.0004217	-0.1246	0.03513	0.825549	rs77391674	2	STK39	0	intronic	0.335	7	5	5	1	1	1
rs75872874	2	168843060	G	A	0.2143	4.187e-05	-0.1445	0.03501	0.962937	rs77391674	2	STK39	0	intronic	0.547	5	4	5	1	0	1
rs79687838	2	168843269	C	T	0.2143	4.187e-05	-0.1445	0.03501	0.962937	rs77391674	2	STK39	0	intronic	5.804	5	2	5	1	0	1
rs58570538	2	168844858	G	A	0.2143	4.187e-05	-0.1445	0.03501	0.962937	rs77391674	2	STK39	0	intronic	13.11	5	4	5	1	0	1
rs58184996	2	168846808	G	T	0.2173	4.233e-05	-0.1447	0.03508	0.978649	rs77391674	2	STK39	0	intronic	19.1	5	5	5	1	0	1
rs6712239	2	168849447	G	T	0.244	0.0002333	-0.1299	0.0351	0.825549	rs77391674	2	STK39	0	intronic	1.291	5	5	5	1	0	1
rs6721630	2	168853091	T	C	0.2986	0.008256	-0.09276	0.035	0.649295	rs77391674	2	STK39	0	intronic	5.178	6	4	5	1	1	1
rs4667997	2	168853757	C	G	0.247	0.0002935	-0.1276	0.03503	0.823603	rs77391674	2	STK39	0	intronic	3.01	7	4	5	1	1	1
rs77093316	2	168854116	C	T	0.2173	2.854e-05	-0.1471	0.03488	0.978649	rs77391674	2	STK39	0	intronic	5.01	7	4	5	1	0	1
rs7582997	2	168855717	T	G	0.2143	2.715e-05	-0.1473	0.03485	0.962937	rs77391674	2	STK39	0	intronic	1.331	5	4	5	1	0	1
rs147303917	2	168855998	G	C	0.2143	2.852e-05	-0.1471	0.03488	0.952401	rs77391674	2	STK39	0	intronic	3.214	6	4	5	1	0	1
rs112305099	2	168856223	C	T	0.2321	0.0002594	-0.1308	0.03559	0.806886	rs77391674	2	STK39	0	intronic	0.3	6	4	5	1	0	1
rs17779495	2	168856424	G	A	0.2302	0.0003892	-0.1305	0.03657	0.770213	rs77391674	2	STK39	0	intronic	14.23	5	4	5	1	0	1
rs79026433	2	168857403	A	G	0.2123	0.000215	-0.1304	0.03503	0.9317	rs77391674	2	STK39	0	intronic	4.307	5	4	5	1	0	1
rs75451725	2	168857776	C	T	0.2103	0.0002362	-0.1298	0.0351	0.931679	rs77391674	2	STK39	0	intronic	0.055	6	4	5	1	0	1
rs529234296	2	168861242	CA	C	0.2282	NA	NA	NA	0.690039	rs77391674	2	STK39	0	intronic	0.91	NA	4	5	1	0	1
rs76599421	2	168865815	G	T	0.2143	0.0001961	-0.1311	0.03499	0.952401	rs77391674	2	STK39	0	intronic	1.917	5	4	5	1	0	1
rs59926529	2	168866766	G	GAAAATATAT	0.2153	0.0001736	-0.1321	0.03497	0.94708	rs77391674	2	STK39	0	intronic	0.418	NA	4	5	1	1	1
rs80166353	2	168867508	A	C	0.2143	0.0001568	-0.133	0.03496	0.952401	rs77391674	2	STK39	0	intronic	5.016	6	4	5	1	0	1
rs1823294	2	168868869	G	C	0.2143	0.0001568	-0.133	0.03496	0.952401	rs77391674	2	STK39	0	intronic	1.213	6	4	5	1	0	1
rs3769424	2	168871749	G	A	0.2222	0.0001164	-0.1346	0.03471	0.840587	rs77391674	2	STK39	0	intronic	2.575	NA	4	5	1	1	1
rs3769423	2	168872075	C	A	0.2222	0.0001164	-0.1346	0.03471	0.840587	rs77391674	2	STK39	0	intronic	6.872	NA	4	5	1	1	1
rs3769422	2	168872254	G	A	0.2222	0.0001164	-0.1346	0.03471	0.840587	rs77391674	2	STK39	0	intronic	5.297	NA	4	5	1	1	1
rs6433028	2	168872402	A	G	0.2222	0.0001164	-0.1346	0.03471	0.840587	rs77391674	2	STK39	0	intronic	1.61	4	4	5	1	1	1
rs6759360	2	168872829	T	A	0.2212	0.0001164	-0.1346	0.03471	0.845422	rs77391674	2	STK39	0	intronic	5.389	5	4	5	1	1	1
rs3769421	2	168873190	C	T	0.2212	0.0001164	-0.1346	0.03471	0.845422	rs77391674	2	STK39	0	intronic	2.385	NA	4	5	1	1	1
rs16854564	2	168873763	A	G	0.2778	0.005732	-0.0966	0.03484	0.613159	rs77391674	2	STK39	0	intronic	10.23	7	4	5	1	0	1
rs80039116	2	168873842	A	T	0.2222	0.0001164	-0.1346	0.03471	0.840587	rs77391674	2	STK39	0	intronic	0.365	6	5	5	1	0	1
rs7597077	2	168873950	G	A	0.2222	0.0001164	-0.1346	0.03471	0.840587	rs77391674	2	STK39	0	intronic	0.343	6	5	5	1	1	1
rs111653965	2	168873961	C	A	0.2222	0.0001164	-0.1346	0.03471	0.840587	rs77391674	2	STK39	0	intronic	0.797	6	5	5	1	0	1
rs140555837	2	168873970	A	ACCTCCGTCT	0.2222	0.0001164	-0.1346	0.03471	0.840587	rs77391674	2	STK39	0	intronic	0.68	NA	5	5	1	1	1
rs7597286	2	168874090	G	C	0.2222	0.0001164	-0.1346	0.03471	0.840587	rs77391674	2	STK39	0	intronic	0.755	6	5	5	1	1	1
rs7558277	2	168874178	T	C	0.2242	0.0001164	-0.1346	0.03471	0.850701	rs77391674	2	STK39	0	intronic	3.665	7	5	5	1	1	1
rs75190850	2	168874179	G	A	0.2222	0.0001164	-0.1346	0.03471	0.840587	rs77391674	2	STK39	0	intronic	2.554	7	5	5	1	0	1
rs7574351	2	168875155	A	G	0.2242	0.0001164	-0.1346	0.03471	0.850701	rs77391674	2	STK39	0	intronic	2.666	7	5	5	1	1	1
rs6433029	2	168875512	T	C	0.2242	0.0001164	-0.1346	0.03471	0.850701	rs77391674	2	STK39	0	intronic	0.343	5	5	5	1	1	1
rs4368297	2	168875696	G	A	0.2242	0.0001164	-0.1346	0.03471	0.850701	rs77391674	2	STK39	0	intronic	4.946	5	5	5	1	1	1
rs4271738	2	168875803	G	C	0.2242	0.0001164	-0.1346	0.03471	0.850701	rs77391674	2	STK39	0	intronic	1.141	7	5	5	1	1	1
rs4549047	2	168875834	T	C	0.2242	0.0001164	-0.1346	0.03471	0.850701	rs77391674	2	STK39	0	intronic	1.968	6	5	5	1	1	1
rs4613237	2	168875986	T	C	0.2242	0.0001164	-0.1346	0.03471	0.850701	rs77391674	2	STK39	0	intronic	4.81	7	5	5	1	1	1
rs4578821	2	168876003	C	A	0.2242	0.0001164	-0.1346	0.03471	0.850701	rs77391674	2	STK39	0	intronic	0.136	7	5	5	1	1	1
rs77545967	2	168876093	C	T	0.2242	0.0001164	-0.1346	0.03471	0.850701	rs77391674	2	STK39	0	intronic	10.39	7	5	5	1	0	1
rs77371338	2	168877675	A	G	0.2232	0.000104	-0.1357	0.03474	0.855528	rs77391674	2	STK39	0	intronic	2.147	7	5	5	1	0	1
rs73971114	2	168880865	C	T	0.2222	0.0004871	-0.1222	0.03484	0.860391	rs77391674	2	STK39	0	intronic	1.364	5	4	5	1	1	1
rs57473443	2	168882376	C	T	0.2202	0.0004871	-0.1222	0.03484	0.850292	rs77391674	2	STK39	0	intronic	0.905	4	2	5	1	1	1
rs60753027	2	168882844	C	T	0.2202	0.0004871	-0.1222	0.03484	0.850292	rs77391674	2	STK39	0	intronic	12.86	7	4	5	1	1	1
rs57177742	2	168882944	A	G	0.2212	0.0004871	-0.1222	0.03484	0.845422	rs77391674	2	STK39	0	intronic	15.52	5	4	5	1	0	1
rs200832679	2	168886595	CA	C	0.2202	0.0004871	-0.1222	0.03484	0.850292	rs77391674	2	STK39	0	intronic	2.863	NA	4	5	1	0	1
rs6433031	2	168888003	G	A	0.2202	0.0004871	-0.1222	0.03484	0.850292	rs77391674	2	STK39	0	intronic	0.402	7	4	5	1	0	1
rs6726723	2	168888168	C	T	0.2202	0.0004871	-0.1222	0.03484	0.850292	rs77391674	2	STK39	0	intronic	0.476	5	4	5	1	0	1
rs11891885	2	168889664	G	A	0.2192	0.0006155	-0.1202	0.03493	0.845288	rs77391674	2	STK39	0	intronic	0.921	7	4	5	1	0	1
rs7584593	2	168890247	G	A	0.2192	0.0006155	-0.1202	0.03493	0.845288	rs77391674	2	STK39	0	intronic	0.924	5	4	5	1	0	1
rs78750962	2	168890780	C	A	0.2212	0.0006155	-0.1202	0.03493	0.855326	rs77391674	2	STK39	0	intronic	3.512	4	4	5	1	0	1
rs74328730	2	168891212	G	A	0.2212	0.0006155	-0.1202	0.03493	0.855326	rs77391674	2	STK39	0	intronic	11.75	5	4	5	1	0	1
rs59927773	2	168892472	C	A	0.2212	0.0006155	-0.1202	0.03493	0.855326	rs77391674	2	STK39	0	intronic	3.708	7	4	5	1	0	1
2:168892918	2	168892918	A	G	0.2014	0.006051	-0.09762	0.03544	0.752904	rs77391674	2	STK39	0	intronic	1.32	NA	4	5	1	0	1
rs7605419	2	168893797	A	C	0.2302	0.00116	-0.1144	0.03506	0.816947	rs77391674	2	STK39	0	intronic	4.578	6	4	5	1	0	1
rs7605670	2	168893984	A	G	0.2202	0.0004176	-0.1239	0.03494	0.840414	rs77391674	2	STK39	0	intronic	8.747	5	4	5	1	0	1
rs191685400	2	168895994	C	T	0.2401	0.0003603	-0.1276	0.03555	0.78809	rs77391674	2	STK39	0	intronic	3.007	6	4	5	1	0	1
rs10169506	2	168896548	C	T	0.2123	0.001526	-0.1124	0.03529	0.799496	rs77391674	2	STK39	0	intronic	3.451	5	4	5	1	0	1
rs6741749	2	168897267	C	T	0.2183	0.00133	-0.1135	0.03519	0.838759	rs77391674	2	STK39	0	intronic	14.69	5	4	5	1	0	1
rs74901086	2	168897535	T	C	0.2212	0.0007007	-0.1199	0.0352	0.844641	rs77391674	2	STK39	0	intronic	1.73	7	4	5	1	0	1
rs11334435	2	168897980	TA	TAA	0.2143	0.001547	-0.1126	0.03541	0.806733	rs77391674	2	STK39	0	intronic	NA	NA	4	5	1	0	1
rs80352200	2	168901157	T	C	0.2173	0.001404	-0.1139	0.03549	0.834548	rs77391674	2	STK39	0	intronic	3.201	4	4	5	1	0	1
rs77318559	2	168901244	G	A	0.2153	0.001371	-0.114	0.03546	0.833787	rs77391674	2	STK39	0	intronic	2.531	4	4	5	1	0	1
rs79709779	2	168909015	T	C	0.2073	0.007522	-0.09547	0.0356	0.816485	rs77391674	2	STK39	0	intronic	0.415	5	4	5	1	0	1
rs12470996	2	168911618	G	C	0.2004	0.005638	-0.09875	0.03555	0.792739	rs77391674	2	STK39	0	intronic	9.263	5	4	5	1	0	1
rs12479070	2	168912084	A	G	0.2024	0.007522	-0.09547	0.0356	0.801949	rs77391674	2	STK39	0	intronic	8.997	6	4	5	1	0	1
rs145584255	2	168914056	GCA	G	0.1835	0.002303	-0.1079	0.03526	0.790348	rs77391674	2	STK39	0	intronic	1.069	NA	4	5	1	0	1
rs60062919	2	168917767	C	A	0.1845	0.002817	-0.1055	0.03518	0.794803	rs77391674	2	STK39	0	intronic	1.467	2b	4	5	1	0	1
rs2290106	2	168921669	C	T	0.1964	0.005527	-0.09836	0.03532	0.76203	rs77391674	2	STK39	0	intronic	12.51	NA	4	5	1	0	1
rs75172895	2	168922154	C	T	0.1974	0.005859	-0.09755	0.03528	0.766551	rs77391674	2	STK39	0	intronic	1.709	6	4	5	1	0	1
rs3835855	2	168922550	C	CAAA	0.1974	0.005527	-0.09836	0.03532	0.766551	rs77391674	2	STK39	0	intronic	0.665	NA	4	5	1	0	1
rs3769419	2	168922651	T	C	0.2004	0.005859	-0.09755	0.03528	0.782095	rs77391674	2	STK39	0	intronic	6.347	NA	4	5	1	0	1
rs57290981	2	168923638	G	A	0.1964	0.005859	-0.09755	0.03528	0.762998	rs77391674	2	STK39	0	intronic	2.381	7	4	5	1	0	1
rs3739115	2	168931610	G	A	0.1954	0.004826	-0.0992	0.03507	0.748927	rs77391674	2	STK39	0	intronic	10.49	NA	4	5	1	0	1
rs11403583	2	168932542	A	AG	0.2014	0.003673	-0.1027	0.03523	0.776999	rs77391674	2	STK39	0	intronic	9.73	NA	4	5	1	0	1
rs4667553	2	168932644	G	T	0.2014	0.003702	-0.1028	0.03529	0.776999	rs77391674	2	STK39	0	intronic	0.762	5	4	5	1	0	1
rs79200035	2	168933420	C	G	0.1954	0.002377	-0.1072	0.03514	0.758522	rs77391674	2	STK39	0	intronic	16.11	5	5	5	1	0	1
rs74844071	2	168933900	C	T	0.1944	0.002231	-0.108	0.03518	0.754071	rs77391674	2	STK39	0	intronic	1.098	7	5	5	1	0	1
rs185111039	2	168934795	C	CCCA	0.2004	0.003734	-0.1026	0.03526	0.782095	rs77391674	2	STK39	0	intronic	12.87	NA	5	5	1	0	1
rs16854669	2	168935123	C	G	0.1994	0.003683	-0.1029	0.0353	0.787231	rs77391674	2	STK39	0	intronic	0.622	6	5	5	1	0	1
rs16854676	2	168936331	G	A	0.1994	0.004601	-0.1046	0.03678	0.787231	rs77391674	2	STK39	0	intronic	0.095	7	4	5	1	0	1
rs79405031	2	168936685	A	G	0.1994	NA	NA	NA	0.787231	rs77391674	2	STK39	0	intronic	3.092	6	4	5	1	0	1
rs113853756	2	168937012	T	C	0.2014	NA	NA	NA	0.776999	rs77391674	2	STK39	0	intronic	1.169	6	4	5	1	0	1
rs12472379	2	168937679	C	T	0.1954	NA	NA	NA	0.768177	rs77391674	2	STK39	0	intronic	0.176	7	4	5	1	0	1
3:196542407	3	196542407	A	C	0.01091	5.454e-07	0.1966	0.03884	1	3:196542407	3	PAK2	0	intronic	1.646	7	4	5	1	0	1
rs144941866	5	179620141	C	T	0.2272	NA	NA	NA	0.689744	rs17080096	4	RASGEF1C	0	intronic	2.667	7	5	15	1	1	1
rs140087186	5	179620836	GCAGA	G	0.2282	NA	NA	NA	0.694716	rs17080096	4	RASGEF1C	0	intronic	2.223	NA	5	15	1	1	1
rs79917833	5	179624702	A	G	0.2331	2.235e-05	-0.1502	0.03515	0.971003	rs17080096	4	RASGEF1C	0	intronic	9.379	5	5	15	1	1	1
rs17080096	5	179626519	G	A	0.2302	6.704e-06	-0.1576	0.03469	1	rs17080096	4	RASGEF1C	0	intronic	1.162	5	5	15	1	1	1
rs72494564	5	179626546	C	T	0.2302	1.479e-05	-0.1521	0.03484	1	rs17080096	4	RASGEF1C	0	intronic	3.39	5	5	15	1	1	1
rs76586448	5	179627119	G	T	0.2302	1.479e-05	-0.1521	0.03484	1	rs17080096	4	RASGEF1C	0	intronic	0.084	7	5	15	1	1	1
rs77871238	5	179627525	G	C	0.2302	1.479e-05	-0.1521	0.03484	1	rs17080096	4	RASGEF1C	0	intronic	0.954	7	5	15	1	1	1
rs76013700	5	179630608	G	C	0.2312	0.0001251	-0.1382	0.0358	0.982364	rs17080096	4	RASGEF1C	0	intronic	1.066	7	5	14	1	1	1
rs9329102	5	179632061	C	T	0.2887	0.0005714	-0.1268	0.0366	0.613325	rs17080096	4	RASGEF1C	0	intronic	0.048	5	5	14	1	1	1
rs7707586	5	179633432	G	C	0.2887	0.0005953	-0.1265	0.03663	0.613325	rs17080096	4	RASGEF1C	0	intronic	0.151	5	5	14	1	1	1
rs141223431	5	179636319	C	A	0.2063	NA	NA	NA	0.721082	rs17080096	4	RASGEF1C	165	upstream	5.725	4	1	14	1	1	1
rs67560429	5	179636575	A	G	0.247	NA	NA	NA	0.671269	rs17080096	4	RASGEF1C	421	upstream	7.38	4	1	14	1	1	1
5:179637209	5	179637209	G	C	0.01389	NA	NA	NA	0.710983	rs17080096	4	RASGEF1C	1055	NA	1.224	NA	5	14	1	0	1
5:179637209	5	179637209	G	A	0.2083	NA	NA	NA	0.710983	rs17080096	4	RASGEF1C	1055	intergenic	1.781	4	5	14	1	1	1
rs3111535	5	179638637	C	T	0.2183	0.0004865	-0.1265	0.03605	0.795405	rs17080096	4	RASGEF1C	2483	intergenic	1.08	NA	5	14	1	1	1
rs3099060	5	179641349	A	G	0.2421	0.0005198	-0.1238	0.03546	0.7067	rs17080096	4	RASGEF1C	5195	intergenic	4.583	NA	5	15	1	1	1
rs3111531	5	179641978	G	A	0.2262	0.0001249	-0.135	0.03497	0.817906	rs17080096	4	RASGEF1C	5824	intergenic	2.856	NA	5	15	1	1	1
rs3111529	5	179643117	C	T	0.2252	9.337e-05	-0.1385	0.03521	0.823384	rs17080096	4	RASGEF1C	6963	intergenic	0.658	NA	5	9	1	1	1
rs3099065	5	179649862	G	A	0.2232	0.0001217	-0.135	0.0349	0.801943	rs17080096	4	RP11-252I14.1	3515	intergenic	3.175	NA	5	9	1	1	1
rs3111524	5	179651704	C	T	0.2232	0.0001297	-0.1345	0.03492	0.801943	rs17080096	4	RP11-252I14.1	1673	intergenic	0.31	NA	5	9	1	1	1
rs3111521	5	179653647	C	T	0.2321	0.0002683	-0.1283	0.035	0.757009	rs17080096	4	RP11-252I14.1	0	ncRNA_exonic	3.062	NA	4	9	1	1	1
rs3111519	5	179654415	T	C	0.2331	0.0002914	-0.1275	0.03498	0.751976	rs17080096	4	RP11-252I14.1	414	upstream	2.321	NA	5	9	1	1	1
rs3111518	5	179655477	G	A	0.2302	0.0002574	-0.1299	0.03534	0.764696	rs17080096	4	RP11-252I14.1	1476	intergenic	0.87	NA	4	15	1	1	1
rs3099062	5	179655478	C	A	0.2312	0.000228	-0.132	0.03561	0.731445	rs17080096	4	RP11-252I14.1	1477	intergenic	0.188	NA	4	15	1	1	1
rs76388801	5	179658098	G	A	0.2163	0.0002616	-0.1291	0.03517	0.730838	rs17080096	4	MAPK9	2044	intergenic	1.248	5	4	5	1	1	1
kgp1384339	5	179677517	G	A	0.2192	0.001322	-0.1136	0.03523	0.692789	rs17080096	4	MAPK9	0	intronic	5.578	5	4	8	1	1	1
rs192391130	7	91228026	C	T	0.01687	NA	NA	NA	0.821673	7:91254938	5	CTB-111F10.1	40135	intergenic	1.919	5	5	15	0	0	1
7:91254938	7	91254938	G	A	0.01587	4.038e-09	0.2358	0.03952	1	7:91254938	5	CTB-111F10.1	13223	intergenic	3.578	6	5	15	0	0	1
8:26571257	8	26571257	C	T	0.005952	5.972e-06	0.1726	0.03779	1	8:26571257	6	ADRA1A	34409	intergenic	0.25	7	5	15	0	0	1
10:62509003	10	62509003	C	T	0.01091	3.513e-07	0.1985	0.03856	1	10:62509003	7	RP11-131N11.4	7416	intergenic	0.577	7	5	15	1	0	1
rs2495725	10	102364004	A	G	0.3571	NA	NA	NA	0.624265	rs34117613	8	HIF1AN	44248	intergenic	6.025	NA	13	14	0	1	1
rs2495724	10	102364598	C	T	0.2867	NA	NA	NA	0.603664	rs34117613	8	HIF1AN	44842	intergenic	1.9	NA	9	14	0	1	1
rs2495723	10	102365929	C	T	0.2877	NA	NA	NA	0.60705	rs34117613	8	HIF1AN	46173	intergenic	0.858	NA	9	14	0	1	1
rs1936361	10	102370841	T	C	0.377	NA	NA	NA	0.657147	rs34117613	8	HIF1AN	51085	intergenic	0.183	NA	9	14	0	1	1
rs1936363	10	102370965	G	A	0.373	NA	NA	NA	0.650924	rs34117613	8	HIF1AN	51209	intergenic	0.534	6	9	14	0	1	1
rs4573623	10	102371381	C	T	0.371	4.889e-05	-0.1499	0.03662	0.665784	rs34117613	8	HIF1AN	51625	intergenic	4.591	5	9	14	0	1	1
rs2495721	10	102374107	G	A	0.2946	8.479e-06	-0.1565	0.03484	0.911532	rs34117613	8	HIF1AN	54351	intergenic	14.38	NA	5	14	0	1	1
rs7092999	10	102375258	A	G	0.3294	3.749e-05	-0.1442	0.03472	0.838273	rs34117613	8	HIF1AN	55502	intergenic	19.95	5	5	14	0	1	1
rs2489029	10	102375362	A	G	0.3006	9.687e-06	-0.1546	0.03465	0.940301	rs34117613	8	HIF1AN	55606	intergenic	3.897	NA	5	14	0	1	1
rs2489028	10	102376261	A	T	0.3026	2.383e-05	-0.1484	0.03486	0.94949	rs34117613	8	HIF1AN	56505	intergenic	3.393	7	5	14	0	1	1
rs2495720	10	102377329	G	C	0.3026	2.175e-05	-0.1513	0.03535	0.959023	rs34117613	8	HIF1AN	57573	intergenic	11.74	5	5	13	0	1	1
rs3763696	10	102377607	A	G	0.3294	3.44e-05	-0.1461	0.03502	0.853898	rs34117613	8	HIF1AN	57851	intergenic	0.446	5	5	14	0	1	1
rs34117613	10	102377923	T	TA	0.2976	7.63e-06	-0.1639	0.03629	1	rs34117613	8	HIF1AN	58167	intergenic	16.59	NA	5	14	0	0	1
rs2489025	10	102378539	T	C	0.3085	1.278e-05	-0.1556	0.03537	0.932288	rs34117613	8	HIF1AN	58783	intergenic	1.593	NA	5	13	0	1	1
rs721298	10	102378770	A	G	0.2996	6.695e-05	-0.1414	0.03523	0.728057	rs34117613	8	HIF1AN	59014	intergenic	1.354	NA	5	13	0	1	1
rs7902336	10	102379091	G	A	0.2996	9.067e-05	-0.1402	0.03558	0.720218	rs34117613	8	HIF1AN	59335	intergenic	3.364	5	5	13	0	1	1
rs2495718	10	102379297	C	T	0.2728	1.731e-05	-0.1544	0.03564	0.818966	rs34117613	8	HIF1AN	59541	intergenic	0.093	NA	5	13	0	1	1
rs7083004	10	102380361	G	C	0.3442	2.648e-05	-0.1543	0.03643	0.779215	rs34117613	8	HIF1AN	60605	intergenic	4.523	5	5	13	0	1	1
rs11190624	10	102380479	C	T	0.3423	2.853e-05	-0.154	0.0365	0.771682	rs34117613	8	HIF1AN	60723	intergenic	7.558	5	5	13	0	1	1
rs7087316	10	102381044	A	C	0.3462	NA	NA	NA	0.760676	rs34117613	8	HIF1AN	61288	intergenic	1.159	5	5	13	0	1	1
rs11343166	10	102381468	G	GA	0.3204	NA	NA	NA	0.718246	rs34117613	8	HIF1AN	61712	intergenic	18.41	NA	5	13	0	1	1
rs10883514	10	102381636	G	A	0.3492	NA	NA	NA	0.751967	rs34117613	8	HIF1AN	61880	intergenic	5.033	5	5	13	0	1	1
rs56066532	10	102381936	C	G	0.3601	NA	NA	NA	0.715913	rs34117613	8	HIF1AN	62180	intergenic	3.234	5	5	13	0	0	1
rs6584387	10	102382727	T	C	0.3502	NA	NA	NA	0.742421	rs34117613	8	HIF1AN	62971	intergenic	10.28	5	5	13	0	1	1
rs7089626	10	102383132	T	G	0.3224	NA	NA	NA	0.770329	rs34117613	8	HIF1AN	63376	intergenic	2.759	5	5	13	0	1	1
rs114781961	11	8417621	A	G	0.01389	NA	NA	NA	0.727713	11:8536826	9	STK33	0	intronic	0.16	7	4	15	1	0	1
11:8536826	11	8536826	G	A	0.01389	3.775e-06	0.1839	0.03941	1	11:8536826	9	STK33	0	intronic	3.254	6	9	15	1	0	1
rs1600809	11	13208412	C	T	0.3581	0.0001078	-0.1422	0.03646	0.770352	rs1384023	10	RP11-413N13.1	34516	intergenic	8.192	NA	5	15	0	1	1
rs4757122	11	13209260	G	T	0.3611	9.523e-05	-0.1434	0.03648	0.779181	rs1384023	10	RP11-413N13.1	35364	intergenic	4.337	7	5	15	0	1	1
rs7111898	11	13209375	T	C	0.3611	9.523e-05	-0.1434	0.03648	0.779181	rs1384023	10	RP11-413N13.1	35479	intergenic	8.652	6	5	15	0	1	1
rs137941186	11	13209448	A	ATAT	0.4167	5.796e-06	-0.1646	0.03597	0.991793	rs1384023	10	RP11-413N13.1	35552	intergenic	6.431	NA	5	15	0	0	1
rs7123902	11	13209767	C	G	0.3631	4.226e-05	-0.15	0.03635	0.786027	rs1384023	10	RP11-413N13.1	35871	intergenic	1.633	5	5	15	0	1	1
rs1384023	11	13209777	T	A	0.4187	5.386e-06	-0.1651	0.03597	1	rs1384023	10	RP11-413N13.1	35881	intergenic	1.809	5	5	15	0	1	1
rs10831993	11	13210794	C	T	0.3591	9.818e-05	-0.1428	0.03641	0.773735	rs1384023	10	RP11-413N13.1	36898	intergenic	1.499	7	5	15	0	1	1
rs1481878	11	13213753	A	T	0.4147	8.053e-06	-0.1568	0.03483	0.975496	rs1384023	10	RP11-413N13.1	39857	intergenic	2.698	6	5	15	0	0	1
rs10831994	11	13213910	C	T	0.3581	0.0001999	-0.1331	0.03558	0.770352	rs1384023	10	RP11-413N13.1	40014	intergenic	4.541	6	5	15	0	1	1
rs5789772	11	13215592	C	CT	0.4127	1.839e-05	-0.1501	0.03478	0.975584	rs1384023	10	RP11-413N13.1	41696	intergenic	12.99	NA	5	15	0	0	1
rs2403660	11	13216275	A	C	0.4137	8.968e-06	-0.1557	0.03477	0.979622	rs1384023	10	RP11-413N13.1	42379	intergenic	2.504	NA	5	15	0	0	1
kgp8397375	11	13216503	T	C	0.4137	1.28e-05	-0.1527	0.03471	0.979622	rs1384023	10	RP11-413N13.1	42607	intergenic	1.896	6	5	15	0	0	1
rs150505915	11	13216606	AT	A	0.4742	NA	NA	NA	0.766245	rs1384023	10	RP11-413N13.1	42710	NA	2.441	NA	5	15	0	0	1
rs558255753	11	13216606	A	T	0.009921	NA	NA	NA	0.766245	rs1384023	10	RP11-413N13.1	42710	intergenic	3.777	NA	5	15	0	0	1
rs2219997	11	13216861	T	C	0.4137	8.958e-06	-0.1555	0.03473	0.979622	rs1384023	10	RP11-413N13.1	42965	intergenic	4.43	7	5	15	0	0	1
rs6486103	11	13217007	T	A	0.4137	1.051e-05	-0.1545	0.03477	0.979622	rs1384023	10	RP11-413N13.1	43111	intergenic	5.476	6	5	15	0	1	1
rs1600804	11	13217416	G	C	0.4147	1.048e-05	-0.1546	0.0348	0.975496	rs1384023	10	RP11-413N13.1	43520	intergenic	1.518	7	5	15	0	1	1
rs1600805	11	13217438	A	G	0.4137	8.958e-06	-0.1555	0.03473	0.979622	rs1384023	10	RP11-413N13.1	43542	intergenic	6.076	7	5	15	0	0	1
rs1600806	11	13217853	A	G	0.4137	1.051e-05	-0.1545	0.03477	0.979622	rs1384023	10	RP11-413N13.1	43957	intergenic	3.541	7	5	15	0	1	1
rs1080775	11	13218438	C	T	0.4137	8.958e-06	-0.1555	0.03473	0.979622	rs1384023	10	RP11-413N13.1	44542	intergenic	7.4	NA	5	9	0	0	1
rs1585999	11	13218911	T	C	0.3581	0.0001914	-0.1331	0.03548	0.770352	rs1384023	10	RP11-413N13.1	45015	intergenic	1.386	3a	5	9	0	1	1
rs1586000	11	13218935	G	A	0.3591	0.0002044	-0.1326	0.0355	0.765564	rs1384023	10	RP11-413N13.1	45039	intergenic	0.806	3a	5	9	0	1	1
rs10831995	11	13219151	A	T	0.4137	8.958e-06	-0.1555	0.03473	0.979622	rs1384023	10	RP11-413N13.1	45255	intergenic	1.111	5	5	9	0	0	1
rs4512799	11	13219305	T	C	0.4137	8.958e-06	-0.1555	0.03473	0.979622	rs1384023	10	RP11-413N13.1	45409	intergenic	1.332	5	5	9	0	0	1
rs4641449	11	13219612	A	T	0.4137	8.958e-06	-0.1555	0.03473	0.979622	rs1384023	10	RP11-413N13.1	45716	intergenic	1.404	5	5	9	0	0	1
rs7478844	11	13219840	T	C	0.4137	1.051e-05	-0.1545	0.03477	0.979622	rs1384023	10	RP11-413N13.1	45944	intergenic	1.551	6	5	15	0	1	1
rs4511265	11	13220169	C	A	0.4137	8.958e-06	-0.1555	0.03473	0.979622	rs1384023	10	RP11-413N13.1	46273	intergenic	0.681	7	5	15	0	0	1
rs34160033	11	13220392	GA	G	0.4137	1.051e-05	-0.1545	0.03477	0.979622	rs1384023	10	RP11-413N13.1	46496	intergenic	0.521	NA	5	15	0	0	1
rs34765071	11	13220982	C	CAA	0.4137	1.557e-05	-0.152	0.0349	0.979622	rs1384023	10	RP11-413N13.1	47086	intergenic	0.449	NA	5	15	0	0	1
rs1905051	11	13221031	C	T	0.4137	8.958e-06	-0.1555	0.03473	0.979622	rs1384023	10	RP11-413N13.1	47135	intergenic	0.81	NA	5	15	0	0	1
rs2403659	11	13221320	C	A	0.4137	8.958e-06	-0.1555	0.03473	0.979622	rs1384023	10	RP11-413N13.1	47424	intergenic	0.777	7	5	15	0	0	1
rs34431496	11	13221661	A	G	0.3571	0.0001935	-0.1332	0.03551	0.767675	rs1384023	10	RP11-413N13.1	47765	intergenic	1.369	7	5	15	0	1	1
rs61882080	11	13221793	C	T	0.3591	0.0001557	-0.1354	0.03558	0.773055	rs1384023	10	RP11-413N13.1	47897	intergenic	0.936	6	5	15	0	1	1
rs61882081	11	13221818	G	C	0.3581	0.0001813	-0.1339	0.03555	0.770352	rs1384023	10	RP11-413N13.1	47922	intergenic	0.63	7	5	15	0	1	1
rs10831996	11	13221916	C	T	0.4137	8.406e-06	-0.1564	0.03483	0.979622	rs1384023	10	RP11-413N13.1	48020	intergenic	0.417	7	5	15	0	0	1
rs4757124	11	13222615	C	T	0.4137	8.885e-06	-0.1561	0.03485	0.979622	rs1384023	10	RP11-413N13.1	48719	intergenic	0.047	7	5	15	0	0	1
rs11022703	11	13223466	T	C	0.3581	0.000181	-0.1337	0.03548	0.770352	rs1384023	10	RP11-413N13.1	49570	intergenic	7.28	7	5	15	0	1	1
rs10766055	11	13224065	G	T	0.4137	1.091e-05	-0.155	0.03495	0.979622	rs1384023	10	RP11-413N13.1	50169	intergenic	9.464	7	5	15	0	1	1
rs111980814	11	13224167	A	AAACT	0.4137	1.058e-05	-0.1554	0.03499	0.979622	rs1384023	10	RP11-413N13.1	50271	intergenic	6.001	NA	5	15	0	0	1
rs7123040	11	13224250	T	A	0.4137	2.027e-05	-0.1504	0.03502	0.979622	rs1384023	10	RP11-413N13.1	50354	intergenic	7.946	7	5	15	0	1	1
rs7120447	11	13224794	A	T	0.4147	2.452e-05	-0.1502	0.03533	0.983649	rs1384023	10	RP11-413N13.1	50898	intergenic	3.144	6	5	15	0	1	1
rs34811437	11	13225174	C	CA	0.4137	2.403e-05	-0.1504	0.03534	0.979622	rs1384023	10	RP11-413N13.1	51278	intergenic	1.21	NA	5	15	0	0	1
rs2086547	11	13225433	G	C	0.4147	2.729e-05	-0.1494	0.03535	0.983649	rs1384023	10	RP11-413N13.1	51537	intergenic	10.5	5	5	15	0	1	1
rs2086548	11	13225468	G	A	0.4137	2.733e-05	-0.1496	0.03538	0.979622	rs1384023	10	RP11-413N13.1	51572	intergenic	2.813	5	5	15	0	1	1
rs112607352	11	13225600	T	TA	0.4137	2.768e-05	-0.1495	0.03539	0.979622	rs1384023	10	RP11-413N13.1	51704	intergenic	0.826	NA	5	15	0	0	1
rs4757125	11	13226013	C	T	0.4137	4.231e-05	-0.1464	0.03549	0.979622	rs1384023	10	RP11-413N13.1	52117	intergenic	0.656	6	5	15	0	0	1
rs10766056	11	13226611	G	T	0.4127	4.25e-05	-0.1466	0.03555	0.975634	rs1384023	10	RP11-413N13.1	52715	intergenic	0.828	7	5	15	0	0	1
rs10766057	11	13226615	A	G	0.4127	4.25e-05	-0.1466	0.03555	0.975634	rs1384023	10	RP11-413N13.1	52719	intergenic	2.019	7	5	15	0	0	1
rs11022704	11	13227272	A	C	0.4167	5.804e-05	-0.1455	0.03593	0.967294	rs1384023	10	RP11-413N13.1	53376	intergenic	2.069	2b	2	15	0	0	1
rs10831997	11	13227981	G	A	0.4107	2.241e-05	-0.1519	0.03556	0.967772	rs1384023	10	RP11-413N13.1	54085	intergenic	0.04	4	5	15	0	0	1
rs7941871	11	13228006	G	T	0.4107	2.241e-05	-0.1519	0.03556	0.967772	rs1384023	10	RP11-413N13.1	54110	intergenic	1.751	4	5	15	0	0	1
rs7929040	11	13228063	A	G	0.4107	2.241e-05	-0.1519	0.03556	0.967772	rs1384023	10	RP11-413N13.1	54167	intergenic	13.4	5	5	15	0	0	1
rs922760	11	13228222	T	G	0.3591	0.0001372	-0.1348	0.03512	0.758848	rs1384023	10	RP11-413N13.1	54326	intergenic	13.72	6	5	15	0	1	1
rs922761	11	13228228	C	T	0.4127	1.411e-05	-0.1555	0.03552	0.959501	rs1384023	10	RP11-413N13.1	54332	intergenic	13.65	7	5	15	0	0	1
kgp1143834	11	13228375	A	G	0.3581	6.034e-05	-0.1411	0.03493	0.763607	rs1384023	10	RP11-413N13.1	54479	intergenic	5.584	5	5	15	0	1	1
rs922763	11	13228523	C	G	0.4117	1.344e-05	-0.1553	0.03538	0.963696	rs1384023	10	RP11-413N13.1	54627	intergenic	2.74	5	5	15	0	0	1
rs12369864	12	69867823	A	G	0.3056	NA	NA	NA	0.933975	rs727948	11	FRS2	0	intronic	0.354	6	1	5	1	1	1
rs57342443	12	69879962	AT	A	0.3482	NA	NA	NA	0.691786	rs727948	11	FRS2	0	intronic	0.181	NA	4	5	1	0	1
rs12371904	12	69880959	T	A	0.2917	0.001007	0.12	0.03631	0.924708	rs727948	11	FRS2	0	intronic	10.65	5	4	5	1	1	1
rs12809428	12	69883434	G	A	0.2986	0.000583	0.125	0.03613	0.956844	rs727948	11	FRS2	0	intronic	0.215	7	5	5	1	1	1
rs35733726	12	69883596	GT	G	0.3085	0.0004807	0.1282	0.0365	0.920728	rs727948	11	FRS2	0	intronic	3.749	NA	5	5	1	0	1
rs12370028	12	69893064	A	G	0.3026	0.0002461	0.1326	0.03595	0.957026	rs727948	11	FRS2	0	intronic	0.389	7	5	5	1	1	1
rs11177694	12	69893974	G	A	0.2937	0.0003121	0.1302	0.03591	0.933722	rs727948	11	FRS2	0	intronic	1.505	7	5	5	1	1	1
rs11177695	12	69895745	G	T	0.4058	NA	NA	NA	0.603471	rs727948	11	FRS2	0	intronic	0.687	6	2	5	1	0	1
rs73140582	12	69905740	G	A	0.2927	0.0003275	0.1292	0.03575	0.929199	rs727948	11	FRS2	0	intronic	8.563	5	5	5	1	1	1
rs73140585	12	69906542	T	C	0.2937	0.0003275	0.1292	0.03575	0.924391	rs727948	11	FRS2	0	intronic	5.919	6	5	5	1	1	1
rs201134804	12	69906895	CT	C	0.2937	0.0004935	0.1253	0.03577	0.924391	rs727948	11	FRS2	0	intronic	0.286	NA	5	5	1	1	1
rs11177699	12	69907602	A	G	0.2946	0.0001337	0.1372	0.0357	0.91961	rs727948	11	FRS2	0	intronic	4.55	7	5	5	1	1	1
rs140198318	12	69913373	G	GT	0.2966	7.487e-05	0.1433	0.03593	0.91977	rs727948	11	FRS2	0	intronic	15.17	NA	5	15	1	0	1
rs35612761	12	69919827	C	T	0.2956	4.451e-05	0.1472	0.03578	0.9245	rs727948	11	FRS2	0	intronic	0.023	6	5	5	1	1	1
rs68085116	12	69920256	TTAA	T	0.2946	4.841e-05	0.1463	0.03575	0.929256	rs727948	11	FRS2	0	intronic	3.562	NA	5	5	1	1	0
rs73142614	12	69921408	A	G	0.3016	7.457e-05	0.1429	0.03582	0.961735	rs727948	11	FRS2	0	intronic	2.867	4	2	5	1	1	0
rs502736	12	69922738	A	G	0.3026	5.6e-05	0.1452	0.03579	0.957026	rs727948	11	FRS2	0	intronic	4.827	NA	5	5	1	1	0
rs11177710	12	69934588	G	A	0.2917	0.0001011	0.1389	0.03548	0.934033	rs727948	11	FRS2	0	intronic	3.851	3a	4	5	1	1	0
rs566133	12	69935182	A	G	0.3998	0.0004404	0.1273	0.03602	0.602092	rs727948	11	FRS2	0	intronic	1.201	4	4	5	1	1	0
rs12370365	12	69936101	G	A	0.2986	0.000157	0.1355	0.03562	0.966358	rs727948	11	FRS2	0	intronic	0.652	7	4	5	1	1	0
rs478600	12	69936919	T	C	0.3998	0.0004475	0.1273	0.03605	0.602092	rs727948	11	FRS2	0	intronic	1.628	7	4	5	1	1	0
rs12828578	12	69939174	C	T	0.2927	0.0001044	0.1385	0.03546	0.93855	rs727948	11	FRS2	0	intronic	2.935	4	4	5	1	1	0
rs546962	12	69942564	T	C	0.3998	0.0004166	0.1277	0.03597	0.602092	rs727948	11	FRS2	0	intronic	1.307	5	5	5	1	1	0
rs4761243	12	69949400	G	A	0.2966	9.321e-05	0.1388	0.03529	0.976116	rs727948	11	FRS2	0	intronic	0.369	2b	2	5	1	1	0
rs12367127	12	69954052	C	T	0.2917	2.757e-05	0.1504	0.03559	0.934717	rs727948	11	FRS2	0	intronic	0.448	6	5	5	1	1	0
rs11177719	12	69958605	G	A	0.2986	4.465e-05	0.1471	0.03577	0.966688	rs727948	11	FRS2	0	intronic	12.31	6	4	5	1	1	0
rs11177726	12	69969010	G	T	0.2917	2.64e-05	0.1496	0.03533	0.934717	rs727948	11	FRS2	0	UTR3	14.81	6	4	4	1	1	1
rs3759202	12	69977344	A	G	0.3016	5.844e-05	0.144	0.03556	0.980899	rs727948	11	MIR3913-1	1157	intergenic	11.01	3a	5	5	1	1	1
rs11177730	12	69978953	T	C	0.2946	4.959e-05	0.1446	0.03537	0.94822	rs727948	11	CCT2	160	upstream	10.23	2b	1	1	1	1	1
rs11177731	12	69979077	C	T	0.2937	3.15e-05	0.1476	0.0352	0.943686	rs727948	11	CCT2	36	upstream	7.791	4	1	1	1	1	1
rs11177732	12	69981111	G	A	0.2996	5.027e-05	0.1419	0.03476	0.990432	rs727948	11	CCT2	0	intronic	4.994	5	3	4	1	1	1
rs11177733	12	69982854	A	G	0.3016	7.793e-05	0.1388	0.03489	0.990453	rs727948	11	CCT2	0	intronic	2.875	6	4	4	1	1	1
rs3841585	12	69983062	C	CTT	0.4048	9.419e-05	0.1373	0.03494	0.603636	rs727948	11	CCT2	0	intronic	2.199	NA	4	4	1	0	1
rs3841585	12	69983062	CTTT	CTT	0.002976	9.419e-05	0.1373	0.03494	0.603636	rs727948	11	CCT2	0	intronic	NA	NA	4	4	1	0	1
rs698132	12	69984006	A	G	0.4048	0.0001151	0.1354	0.03488	0.601675	rs727948	11	CCT2	0	intronic	0.69	NA	4	4	1	1	1
rs553144	12	69985168	C	G	0.4058	0.0001129	0.1356	0.0349	0.601029	rs727948	11	CCT2	0	intronic	1.923	4	4	4	1	1	1
rs3884028	12	69985315	T	TATA	0.4058	0.0001151	0.1354	0.03488	0.601029	rs727948	11	CCT2	0	intronic	0.64	NA	4	4	1	1	1
rs3858594	12	69985452	T	A	0.3016	7.793e-05	0.1388	0.03489	0.981048	rs727948	11	CCT2	0	intronic	6.153	5	4	4	1	1	1
rs144572373	12	69985659	AAAC	A	0.3016	5.027e-05	0.1419	0.03476	0.981048	rs727948	11	CCT2	0	intronic	2.343	NA	4	4	1	1	1
rs1043434	12	69986788	A	G	0.3026	7.793e-05	0.1388	0.03489	0.985829	rs727948	11	CCT2	0	exonic	12.25	5	4	4	1	1	1
rs11177738	12	69987936	T	C	0.2956	7.793e-05	0.1388	0.03489	0.95309	rs727948	11	CCT2	0	intronic	0.108	6	4	4	1	1	1
rs35956654	12	69988091	A	G	0.3026	7.793e-05	0.1388	0.03489	0.985829	rs727948	11	CCT2	0	intronic	3.273	7	4	4	1	1	1
rs36011898	12	69989573	ATGT	A	0.2927	5.027e-05	0.1419	0.03476	0.957853	rs727948	11	CCT2	0	intronic	1.469	NA	4	4	1	1	1
rs66471750	12	69990023	TATG	T	0.2927	5.027e-05	0.1419	0.03476	0.957853	rs727948	11	CCT2	0	intronic	7.088	NA	4	4	1	1	1
rs3217625	12	69991568	AAT	A	0.2917	5.027e-05	0.1419	0.03476	0.953333	rs727948	11	CCT2	0	intronic	6.186	NA	4	4	1	1	1
rs11832926	12	69991660	A	T	0.2917	5.283e-05	0.1416	0.03479	0.953333	rs727948	11	CCT2	0	intronic	6.5	7	4	4	1	1	1
rs4761246	12	69992448	G	A	0.2917	5.027e-05	0.1419	0.03476	0.953333	rs727948	11	CCT2	0	intronic	5.585	4	4	4	1	1	1
rs3837482	12	69994438	T	TC	0.2927	5.027e-05	0.1419	0.03476	0.948831	rs727948	11	CCT2	0	intronic	1.84	NA	4	4	1	1	1
rs11177742	12	69995039	C	A	0.2946	5.404e-05	0.1415	0.0348	0.948548	rs727948	11	CCT2	0	intronic	11.59	7	4	4	1	1	1
rs7200	12	69995273	T	C	0.2937	4.337e-05	0.1431	0.03475	0.944039	rs727948	11	CCT2	0	UTR3	11.31	6	4	4	1	1	1
rs3177122	12	69995347	A	G	0.2937	5.027e-05	0.1419	0.03476	0.944039	rs727948	11	CCT2	0	UTR3	0.342	6	4	4	1	1	1
rs35988455	12	69995441	AATG	A	0.2937	5.283e-05	0.1416	0.03479	0.944039	rs727948	11	CCT2	90	downstream	6.02	NA	4	4	1	1	1
rs35232489	12	69997282	G	A	0.3026	5.027e-05	0.1419	0.03476	0.985829	rs727948	11	CCT2	1931	intergenic	1.913	4	4	4	1	1	1
rs61929307	12	69997422	T	G	0.3036	5.027e-05	0.1419	0.03476	0.981126	rs727948	11	CCT2	2071	intergenic	9.772	5	4	5	1	1	1
rs11177745	12	69998187	C	T	0.3006	5.027e-05	0.1419	0.03476	0.995225	rs727948	11	CCT2	2836	intergenic	9.076	7	4	5	1	1	1
rs4761247	12	69998315	T	C	0.3006	5.283e-05	0.1416	0.03479	0.995225	rs727948	11	CCT2	2964	intergenic	8.148	5	4	5	1	1	1
12:69999036	12	69999036	C	CT	0.2976	7.22e-05	0.1418	0.03548	0.942113	rs727948	11	LRRC10	3314	intergenic	3.555	NA	2	5	1	0	1
rs112731306	12	69999383	G	T	0.3036	4.608e-05	0.1431	0.03487	0.981126	rs727948	11	LRRC10	2967	intergenic	0.078	7	5	5	1	1	1
rs11177748	12	70000065	C	G	0.3006	5.004e-05	0.142	0.03477	0.995225	rs727948	11	LRRC10	2285	intergenic	1.669	5	2	15	1	1	1
rs727948	12	70000518	A	G	0.2996	9.431e-06	0.1555	0.0348	1	rs727948	11	LRRC10	1832	intergenic	2.012	6	1	15	1	0	1
rs12367890	12	70001455	G	A	0.2966	1.252e-05	0.1535	0.03485	0.938691	rs727948	11	LRRC10	895	downstream	0.487	7	1	15	1	1	1
rs71437114	12	70001530	AAAATTG	A	0.2966	1.504e-05	0.1524	0.03493	0.929413	rs727948	11	LRRC10	820	downstream	3.278	NA	1	15	1	1	1
rs67136226	12	70001814	AAGTC	A	0.2976	1.252e-05	0.1535	0.03485	0.933966	rs727948	11	LRRC10	536	downstream	2.899	NA	1	15	1	1	1
rs11177751	12	70002488	A	G	0.3056	1.452e-05	0.1524	0.03487	0.971623	rs727948	11	LRRC10	0	UTR3	7.487	4	1	15	1	1	1
rs56245141	12	70006216	A	AC	0.3135	4.1e-05	0.1471	0.03559	0.926981	rs727948	11	LRRC10	1273	intergenic	0.72	NA	1	15	1	1	1
rs10784788	12	70008759	C	T	0.3125	1.855e-05	0.159	0.03682	0.913061	rs727948	11	LRRC10	3816	intergenic	0.361	7	5	15	1	1	1
rs34929418	12	70013323	C	G	0.3085	NA	NA	NA	0.799132	rs727948	11	LRRC10	8380	intergenic	0.236	7	5	15	1	1	1
rs71454237	12	70013415	G	A	0.3085	NA	NA	NA	0.800187	rs727948	11	LRRC10	8472	intergenic	4.574	6	5	15	1	1	1
rs541204742	12	77396924	T	TA	0.09028	NA	NA	NA	0.869646	rs10862951	12	E2F7	18102	intergenic	3.67	NA	5	15	0	0	1
rs17759056	12	77397010	C	G	0.08333	0.001873	-0.1138	0.03642	0.925342	rs10862951	12	E2F7	18016	intergenic	2.061	7	5	15	0	1	1
rs17815571	12	77398434	A	G	0.08333	0.0004377	-0.128	0.0362	0.925342	rs10862951	12	E2F7	16592	intergenic	0.508	7	5	15	0	1	1
rs17815608	12	77398721	A	T	0.08433	0.0001159	-0.14	0.03606	0.91339	rs10862951	12	E2F7	16305	intergenic	7.616	5	5	15	0	1	1
rs17759214	12	77399915	T	C	0.08631	0.000199	-0.1349	0.03604	0.962732	rs10862951	12	E2F7	15111	intergenic	16	5	5	15	0	1	1
rs10862951	12	77404522	A	G	0.08532	4.993e-07	-0.176	0.03465	1	rs10862951	12	E2F7	10504	intergenic	16.17	5	1	15	0	0	1
rs12822322	12	91022199	A	G	0.06349	7.533e-06	-0.1638	0.03624	1	rs12822322	13	RP11-632B21.1	5599	intergenic	5.367	7	5	15	1	0	1
rs59856488	12	91025937	A	T	0.06349	0.00017	-0.1347	0.0356	0.772721	rs12822322	13	RP11-632B21.1	9337	intergenic	1.379	6	7	15	1	0	1
rs12827173	12	91027923	G	A	0.06349	0.00017	-0.1347	0.0356	0.772721	rs12822322	13	RP11-632B21.1	11323	intergenic	0.017	7	9	15	0	0	1
rs12316508	12	91036272	C	T	0.07044	0.00112	-0.1139	0.0348	0.658124	rs12822322	13	RP11-632B21.1	19672	intergenic	2.534	7	14	15	0	0	1
rs12310034	12	91037942	C	T	0.0625	0.0002371	-0.1283	0.0347	0.756202	rs12822322	13	RP11-632B21.1	21342	intergenic	1.961	6	7	15	0	0	1
rs10506992	12	91038334	T	C	0.0625	0.0002371	-0.1283	0.0347	0.756202	rs12822322	13	RP11-632B21.1	21734	intergenic	1.467	NA	14	15	0	0	1
rs17018168	12	91038568	G	A	0.0625	0.0002371	-0.1283	0.0347	0.756202	rs12822322	13	RP11-632B21.1	21968	intergenic	6.996	7	14	15	0	0	1
rs10859008	12	91039805	G	A	0.07044	0.001175	-0.1135	0.03483	0.658124	rs12822322	13	RP11-632B21.1	23205	intergenic	0.909	6	9	15	0	0	1
rs11105721	12	91042157	G	A	0.06349	0.0004523	-0.1233	0.03496	0.742641	rs12822322	13	RP11-632B21.1	25557	intergenic	0.227	7	9	15	0	0	1
rs58893501	12	91044832	CTTTAA	C	0.0625	0.0004847	-0.1226	0.03496	0.756202	rs12822322	13	RP11-632B21.1	28232	intergenic	7.475	NA	14	15	0	0	1
rs10219625	12	91045176	A	T	0.0625	0.0004847	-0.1226	0.03496	0.756202	rs12822322	13	RP11-632B21.1	28576	intergenic	5.656	7	14	15	0	0	1
rs11503340	12	91046130	C	A	0.07143	0.002137	-0.108	0.03503	0.647356	rs12822322	13	RP11-632B21.1	29530	intergenic	9.37	5	7	15	0	0	1
rs150351441	12	91048150	TAATA	T	0.0625	0.0004847	-0.1226	0.03496	0.756202	rs12822322	13	RP11-632B21.1	31550	intergenic	2.668	NA	9	15	0	0	1
12:91049834	12	91049834	GGAGAGAGA	GGAGA	0.0625	0.0005015	-0.1224	0.035	0.756202	rs12822322	13	RP11-632B21.1	33234	intergenic	NA	NA	14	15	0	0	1
rs35562301	12	91050798	A	G	0.0625	0.0004847	-0.1226	0.03496	0.756202	rs12822322	13	RP11-632B21.1	34198	intergenic	1.202	6	14	15	0	0	1
rs36074144	12	91050979	C	G	0.0625	0.0004847	-0.1226	0.03496	0.756202	rs12822322	13	RP11-632B21.1	34379	intergenic	0.4	7	14	15	0	0	1
rs12815887	12	91051321	A	G	0.07044	0.001234	-0.1173	0.03613	0.658124	rs12822322	13	RP11-632B21.1	34721	intergenic	5.802	6	14	15	0	0	1
rs10859014	12	91054309	T	C	0.07044	0.002137	-0.108	0.03503	0.658124	rs12822322	13	RP11-632B21.1	37709	intergenic	2.143	6	14	15	0	0	1
rs10859015	12	91054347	A	G	0.07044	0.002137	-0.108	0.03503	0.658124	rs12822322	13	RP11-632B21.1	37747	intergenic	1.4	7	14	15	0	0	1
rs11105731	12	91056296	G	A	0.07044	0.002155	-0.1082	0.03512	0.658124	rs12822322	13	RP11-632B21.1	39696	intergenic	3.381	6	9	15	0	0	1
rs11105733	12	91057266	A	G	0.0625	0.0004961	-0.1227	0.03505	0.756202	rs12822322	13	RP11-632B21.1	40666	intergenic	1.692	7	14	15	0	0	1
rs11609765	12	91058082	G	A	0.0625	0.0002373	-0.1306	0.03533	0.756202	rs12822322	13	RP11-632B21.1	41482	intergenic	0.024	6	9	15	0	0	1
rs2816725	14	49260570	A	G	0.1131	0.04753	-0.06964	0.03508	0.615362	rs2585383	14	RP11-737F10.1	27992	intergenic	0.345	6	5	15	0	0	1
rs2585344	14	49261472	T	C	0.1151	0.04298	-0.07127	0.03514	0.628877	rs2585383	14	RP11-737F10.1	27090	intergenic	2.524	NA	7	15	0	0	1
rs2585334	14	49263235	T	C	0.1151	0.04298	-0.07127	0.03514	0.628877	rs2585383	14	RP11-737F10.1	25327	intergenic	1.888	NA	9	15	0	0	1
rs114375350	14	49263322	C	A	0.1151	0.04298	-0.07127	0.03514	0.628877	rs2585383	14	RP11-737F10.1	25240	intergenic	1.477	6	9	15	0	0	1
rs2816731	14	49264061	G	A	0.1151	0.04298	-0.07127	0.03514	0.628877	rs2585383	14	RP11-737F10.1	24501	intergenic	1.237	6	9	15	0	0	1
rs2585320	14	49264657	C	A	0.1151	0.04298	-0.07127	0.03514	0.628877	rs2585383	14	RP11-737F10.1	23905	intergenic	1.082	NA	9	15	0	0	1
rs2585319	14	49264674	T	C	0.1151	0.04298	-0.07127	0.03514	0.628877	rs2585383	14	RP11-737F10.1	23888	intergenic	7.505	NA	9	15	0	0	1
rs2816732	14	49264822	G	C	0.1151	0.04298	-0.07127	0.03514	0.628877	rs2585383	14	RP11-737F10.1	23740	intergenic	0.098	6	14	15	0	0	1
rs2816735	14	49266160	A	G	0.1131	0.04298	-0.07127	0.03514	0.615362	rs2585383	14	RP11-737F10.1	22402	intergenic	9.344	6	14	15	0	0	1
rs146144969	14	49267000	C	T	0.1131	0.04298	-0.07127	0.03514	0.615362	rs2585383	14	RP11-737F10.1	21562	intergenic	1.49	7	9	15	0	0	1
rs2585383	14	49269680	C	G	0.1696	3.841e-06	-0.1613	0.0346	1	rs2585383	14	RP11-737F10.1	18882	intergenic	0.02	7	9	15	0	0	1
rs2585382	14	49270792	G	T	0.1667	6.447e-06	-0.1575	0.03462	0.977964	rs2585383	14	RP11-737F10.1	17770	intergenic	0.17	NA	9	15	0	0	1
rs765368	14	49271744	C	G	0.1696	3.841e-06	-0.1613	0.0346	1	rs2585383	14	RP11-737F10.1	16818	intergenic	1.117	6	9	15	0	0	1
rs765367	14	49271815	C	T	0.1696	3.841e-06	-0.1613	0.0346	1	rs2585383	14	RP11-737F10.1	16747	intergenic	2.396	NA	9	15	0	0	1
rs147330127	14	49272818	TC	T	0.1657	1.259e-05	-0.1529	0.03473	0.970628	rs2585383	14	RP11-737F10.1	15744	intergenic	1.982	NA	7	15	0	0	1
rs72688123	14	49277962	C	T	0.1667	1.85e-05	-0.1497	0.03468	0.96309	rs2585383	14	RP11-737F10.1	10600	intergenic	0.617	7	9	15	0	0	1
rs76459502	14	49283376	C	T	0.1647	1.806e-05	-0.1505	0.03482	0.948533	rs2585383	14	RP11-737F10.1	5186	intergenic	3.614	6	9	15	1	0	1
rs56177443	14	49284851	A	T	0.1667	2.882e-05	-0.1481	0.03514	0.948331	rs2585383	14	RP11-737F10.1	3711	intergenic	1.81	7	9	15	1	0	1
rs4335707	14	49288364	G	T	0.1696	9.742e-06	-0.1552	0.03479	0.956044	rs2585383	14	RP11-737F10.1	198	upstream	6.504	6	9	15	1	0	1
rs55846804	14	49289634	G	C	0.1716	5.495e-06	-0.1595	0.0348	0.942312	rs2585383	14	RP11-737F10.1	837	downstream	0.243	6	9	15	1	0	1
rs72688138	14	49290282	G	A	0.1696	9.742e-06	-0.1552	0.03479	0.956044	rs2585383	14	RP11-737F10.1	1485	intergenic	0.201	7	9	15	1	0	1
rs34851771	14	49291509	C	CA	0.1716	5.495e-06	-0.1595	0.0348	0.942312	rs2585383	14	RP11-737F10.1	2712	intergenic	4.227	NA	9	15	1	0	1
rs8016811	14	49295210	T	A	0.1726	6.814e-05	-0.1419	0.03539	0.9348	rs2585383	14	RP11-737F10.1	6413	intergenic	0.847	6	9	15	1	0	1
rs5808466	14	49296752	AGTGT	A	0.1696	1.141e-05	-0.1538	0.03475	0.956044	rs2585383	14	RP11-737F10.1	7955	intergenic	2.048	NA	7	15	1	0	1
rs4287469	14	49296827	A	T	0.1716	1.163e-05	-0.1534	0.03471	0.942312	rs2585383	14	RP11-737F10.1	8030	intergenic	2.336	6	7	15	1	0	1
rs4591049	14	49296968	A	G	0.1716	1.482e-05	-0.1511	0.03462	0.942312	rs2585383	14	RP11-737F10.1	8171	intergenic	1.038	6	7	15	1	0	1
rs72688144	14	49298200	C	T	0.1716	1.163e-05	-0.1534	0.03471	0.942312	rs2585383	14	RP11-737F10.1	9403	intergenic	0.094	7	5	15	1	0	1
rs6572520	14	49300194	G	T	0.1627	1.703e-05	-0.1507	0.03476	0.876382	rs2585383	14	RP11-737F10.1	11397	intergenic	7.245	7	5	15	0	0	1
rs138848962	14	49300318	C	T	0.1617	3.324e-05	-0.1463	0.03499	0.869393	rs2585383	14	RP11-737F10.1	11521	intergenic	2.414	6	5	15	0	0	1
rs72688148	14	49301115	C	T	0.1667	1.169e-05	-0.155	0.03507	0.905226	rs2585383	14	RP11-737F10.1	12318	intergenic	6.117	7	5	15	0	0	1
rs72688149	14	49301406	C	T	0.1667	1.013e-05	-0.1565	0.03516	0.905226	rs2585383	14	RP11-737F10.1	12609	intergenic	1.296	6	5	15	0	0	1
rs7143211	14	49302009	T	G	0.1915	1.381e-05	-0.1565	0.0357	0.750293	rs2585383	14	RP11-737F10.1	13212	intergenic	1.264	7	5	15	0	0	1
rs7143415	14	49302161	T	A	0.1647	1.366e-05	-0.1542	0.03517	0.919277	rs2585383	14	RP11-737F10.1	13364	intergenic	6.838	7	5	15	0	0	1
rs111432240	14	49302486	CATTGG	C	0.1667	9.079e-06	-0.157	0.03508	0.905226	rs2585383	14	RP11-737F10.1	13689	intergenic	4.277	NA	5	15	0	0	1
rs73265307	14	49303219	T	C	0.1786	3.784e-05	-0.1452	0.03499	0.829008	rs2585383	14	RP11-737F10.1	14422	intergenic	0.726	7	5	15	0	0	1
rs144648243	14	49303303	AG	A	0.1766	3.408e-05	-0.1483	0.03551	0.815033	rs2585383	14	RP11-737F10.1	14506	intergenic	1.019	NA	5	15	0	0	1
kgp3583856	14	49303556	G	A	0.1776	2.995e-05	-0.1459	0.03469	0.808929	rs2585383	14	RP11-737F10.1	14759	intergenic	0.313	7	5	15	0	0	1
rs4900870	14	49303827	C	T	0.1776	0.000131	-0.1348	0.03503	0.786679	rs2585383	14	RP11-737F10.1	15030	intergenic	1.234	7	5	15	0	0	1
rs117575174	14	65554188	C	T	0.1825	4.014e-06	-0.1663	0.03573	0.804673	rs7342509	15	MAX:RP11-840I19.3	0:0	ncRNA_intronic	1.677	5	4	4	1	0	1
rs1957947	14	65554890	C	T	0.2173	0.0004418	-0.1269	0.0359	0.62287	rs7342509	15	MAX:RP11-840I19.3	0:0	ncRNA_intronic	0.028	NA	4	4	1	1	1
rs7151350	14	65556049	T	C	0.2173	0.0004418	-0.1269	0.0359	0.62287	rs7342509	15	MAX:RP11-840I19.3	0:0	ncRNA_intronic	3.687	6	4	4	1	1	1
rs59696788	14	65560023	A	G	0.1895	1.43e-05	-0.1577	0.03604	0.657106	rs7342509	15	MAX:RP11-840I19.3	0:0	ncRNA_intronic	0.636	6	4	4	1	0	1
rs1256416	14	65563775	C	T	0.1984	7.657e-06	-0.1627	0.03604	0.705412	rs7342509	15	MAX	0	intronic	1.326	NA	2	6	1	1	1
rs1256415	14	65563822	C	T	0.2173	0.0004418	-0.1269	0.0359	0.62287	rs7342509	15	MAX	0	intronic	6.211	NA	2	6	1	1	1
rs33995031	14	65566419	GAA	G	0.2093	0.0004418	-0.1269	0.0359	0.660755	rs7342509	15	MAX	0	intronic	2.747	NA	1	5	1	0	1
rs2781371	14	65567500	G	C	0.2103	0.0004418	-0.1269	0.0359	0.656482	rs7342509	15	MAX	0	intronic	6.974	7	1	5	1	1	1
rs1953230	14	65570037	T	C	0.2093	0.0004333	-0.1268	0.03584	0.660755	rs7342509	15	MAX	623	upstream	9.509	4	1	2	1	1	1
rs1953231	14	65570269	C	A	0.2093	0.0004333	-0.1268	0.03584	0.660755	rs7342509	15	MAX	855	upstream	1.085	4	1	2	1	1	1
rs945014	14	65574391	G	T	0.2153	0.0006784	-0.1194	0.03497	0.693922	rs7342509	15	MAX	4977	intergenic	4.486	4	2	15	1	1	1
rs8017356	14	65581781	G	A	0.2113	0.0004043	-0.1263	0.0355	0.70621	rs7342509	15	RNU2-14P	9288	intergenic	0.066	7	14	15	1	1	1
rs12895232	14	65585219	G	T	0.2073	0.0002628	-0.1321	0.03598	0.680186	rs7342509	15	RNU2-14P	5850	intergenic	20.6	2b	2	15	1	1	1
rs6573590	14	65586097	A	G	0.2103	0.000413	-0.1275	0.0359	0.699642	rs7342509	15	RNU2-14P	4972	intergenic	7.663	7	14	15	1	1	1
rs2225676	14	65594460	T	C	0.2113	0.0004985	-0.1242	0.03548	0.70621	rs7342509	15	RNU2-14P	3199	intergenic	2.539	7	14	15	1	1	1
rs11626796	14	65596148	C	A	0.2143	0.0004205	-0.1275	0.03594	0.728548	rs7342509	15	RNU2-14P	4887	intergenic	1.759	6	14	15	1	1	1
rs7342509	14	65599443	C	A	0.1706	9.407e-07	-0.1768	0.03566	1	rs7342509	15	RNU2-14P	8182	intergenic	0.575	7	5	15	1	0	1
15:57085343	15	57085343	C	A	0.006944	2.473e-07	0.2092	0.04011	1	15:57085343	16	ZNF280D	0	intronic	6.791	7	5	15	1	0	1
rs191769059	15	57100848	C	G	0.006944	NA	NA	NA	1	15:57085343	16	ZNF280D	0	intronic	4.069	5	5	9	1	0	1
rs1906779	15	63303416	G	A	0.4673	1.242e-06	0.175	0.03572	0.959912	rs12442303	17	TPM1	31414	intergenic	1.889	4	2	15	0	1	1
rs77899283	15	63304736	C	A	0.4722	9.5e-07	0.1747	0.03526	0.995932	rs12442303	17	TPM1	30094	intergenic	0.699	6	5	15	0	1	1
rs59705303	15	63305871	C	T	0.4722	9.5e-07	0.1747	0.03526	0.995932	rs12442303	17	TPM1	28959	intergenic	12.82	2b	2	15	0	1	1
rs11638819	15	63306206	T	C	0.4742	1.802e-06	0.1703	0.03531	0.987867	rs12442303	17	TPM1	28624	intergenic	1.827	6	2	15	0	1	1
rs79694409	15	63306896	C	G	0.4722	1.231e-06	0.1728	0.03527	0.995932	rs12442303	17	TPM1	27934	intergenic	0.891	5	5	15	0	1	1
rs77224727	15	63307181	T	G	0.4732	1.129e-06	0.1734	0.03525	0.9919	rs12442303	17	TPM1	27649	intergenic	0.66	NA	2	15	0	1	1
rs8029221	15	63308583	C	T	0.4921	2.03e-05	0.1495	0.03481	0.848022	rs12442303	17	TPM1	26247	intergenic	1.996	5	2	15	0	1	1
rs11071710	15	63309193	A	G	0.4921	3.099e-05	0.1466	0.03494	0.848022	rs12442303	17	TPM1	25637	intergenic	0.518	5	5	15	0	1	1
rs8034365	15	63309203	C	T	0.4921	3.099e-05	0.1466	0.03494	0.848022	rs12442303	17	TPM1	25627	intergenic	1.481	5	5	15	0	1	1
rs138756403	15	63309496	GTTGT	G	0.4931	2.775e-05	0.1478	0.03501	0.851536	rs12442303	17	TPM1	25334	intergenic	3.521	NA	5	15	0	1	1
rs12593573	15	63309919	G	A	0.4931	2.769e-05	0.148	0.03504	0.851536	rs12442303	17	TPM1	24911	intergenic	2.525	7	5	15	0	1	1
rs12593531	15	63309936	C	G	0.4921	2.156e-05	0.1502	0.03509	0.848022	rs12442303	17	TPM1	24894	intergenic	2.324	7	5	15	0	1	1
rs11071711	15	63310185	C	T	0.4931	2.769e-05	0.148	0.03504	0.851536	rs12442303	17	TPM1	24645	intergenic	0.52	7	5	15	0	1	1
rs11071712	15	63310281	C	T	0.494	2.133e-05	0.1503	0.03508	0.847458	rs12442303	17	TPM1	24549	intergenic	0.21	6	5	15	0	1	1
rs11071713	15	63310283	T	C	0.494	2.133e-05	0.1503	0.03508	0.847458	rs12442303	17	TPM1	24547	intergenic	3.018	6	5	15	0	1	1
rs11071714	15	63310383	T	C	0.4931	2.769e-05	0.148	0.03504	0.851536	rs12442303	17	TPM1	24447	intergenic	0.348	6	5	15	0	1	1
rs11071715	15	63310389	T	C	0.4931	2.769e-05	0.148	0.03504	0.851536	rs12442303	17	TPM1	24441	intergenic	3.914	6	5	15	0	1	1
rs58819603	15	63310866	T	A	0.4921	2.516e-05	0.1489	0.03507	0.848022	rs12442303	17	TPM1	23964	intergenic	2.183	7	5	15	0	1	1
rs59418037	15	63310871	A	G	0.4931	2.769e-05	0.148	0.03504	0.851536	rs12442303	17	TPM1	23959	intergenic	1.301	7	5	15	0	1	1
rs11636033	15	63311091	A	C	0.4931	2.769e-05	0.148	0.03504	0.851536	rs12442303	17	TPM1	23739	intergenic	2.796	4	5	15	0	1	1
rs12442303	15	63311993	C	T	0.4712	4.387e-07	0.18	0.03523	1	rs12442303	17	TPM1	22837	intergenic	8.199	1f	2	15	0	1	1
rs12595635	15	63313311	G	A	0.4712	4.387e-07	0.18	0.03523	1	rs12442303	17	TPM1	21519	intergenic	2.309	4	5	15	0	1	1
rs12595658	15	63313386	G	A	0.4712	4.387e-07	0.18	0.03523	1	rs12442303	17	TPM1	21444	intergenic	1.971	5	5	15	0	1	1
rs11071716	15	63313542	G	A	0.4712	4.387e-07	0.18	0.03523	1	rs12442303	17	TPM1	21288	intergenic	3.591	5	5	15	0	1	1
rs11071717	15	63313560	C	A	0.4712	4.387e-07	0.18	0.03523	1	rs12442303	17	TPM1	21270	intergenic	1.331	5	5	15	0	1	1
rs12591539	15	63314485	A	C	0.4772	NA	NA	NA	0.967985	rs12442303	17	TPM1	20345	intergenic	4.148	5	5	15	0	1	1
rs1873146	15	63316652	G	A	0.4692	NA	NA	NA	0.983741	rs12442303	17	TPM1	18178	intergenic	0.429	NA	5	15	0	1	1
rs78812090	15	63317121	CTTAAATGTCCCTGGCTTCACAGT	C	0.4683	NA	NA	NA	0.987855	rs12442303	17	TPM1	17709	intergenic	4.022	NA	5	15	0	1	1
rs16946312	15	63317191	G	A	0.4692	NA	NA	NA	0.975589	rs12442303	17	TPM1	17639	intergenic	1.397	5	5	15	0	1	1
rs79717162	15	63319746	A	G	0.4683	NA	NA	NA	0.963521	rs12442303	17	TPM1	15084	intergenic	2.059	5	5	15	0	1	1
rs16946319	15	63320840	A	T	0.4683	NA	NA	NA	0.955622	rs12442303	17	TPM1	13990	intergenic	13.96	3a	5	15	0	1	1
rs7496697	15	63321527	C	A	0.4663	NA	NA	NA	0.955728	rs12442303	17	TPM1	13303	intergenic	2.546	7	5	15	0	1	1
rs12593315	15	63322026	G	A	0.4563	NA	NA	NA	0.909081	rs12442303	17	TPM1	12804	intergenic	12.2	4	2	15	0	1	1
rs12593321	15	63322194	C	G	0.4583	NA	NA	NA	0.900823	rs12442303	17	TPM1	12636	intergenic	4.638	1f	2	15	0	1	1
rs8026047	15	63323347	G	C	0.4504	NA	NA	NA	0.860057	rs3825973	17	TPM1	11483	intergenic	0.83	6	5	15	0	1	1
rs2899687	15	63325548	T	C	0.4861	NA	NA	NA	0.802413	rs3825973	17	TPM1	9282	intergenic	1.395	5	5	15	1	1	1
rs11071718	15	63327533	C	A	0.4345	2.739e-06	0.169	0.03568	0.976146	rs3825973	17	TPM1	7297	intergenic	7.378	1f	2	15	1	1	1
rs7172943	15	63327710	G	A	0.4335	2.035e-06	0.1693	0.03529	0.980128	rs3825973	17	TPM1	7120	intergenic	4.729	1f	2	15	1	1	1
rs12440304	15	63329404	G	A	0.4335	5.572e-06	0.1597	0.03484	0.996041	rs3825973	17	TPM1	5426	intergenic	0.002	7	5	14	1	1	1
rs12595171	15	63330245	G	A	0.4196	1.33e-05	0.1542	0.03512	0.913992	rs3825973	17	TPM1	4585	intergenic	0.159	5	5	14	1	1	1
rs12442706	15	63330450	G	A	0.4157	9.026e-06	0.1572	0.03511	0.929778	rs3825973	17	TPM1	4380	intergenic	0.636	5	5	14	1	1	1
rs12148057	15	63331509	T	A	0.4464	3.309e-05	0.1454	0.03478	0.945736	rs3825973	17	TPM1	3321	intergenic	2.261	5	5	14	1	1	1
rs4775608	15	63331940	G	A	0.4464	3.256e-05	0.1454	0.03473	0.945736	rs3825973	17	TPM1	2890	intergenic	3.21	7	5	14	1	1	1
rs4775610	15	63332057	G	A	0.4464	3.256e-05	0.1454	0.03473	0.945736	rs3825973	17	TPM1	2773	intergenic	5.819	6	5	14	1	1	1
rs4775612	15	63332157	C	T	0.4464	3.256e-05	0.1454	0.03473	0.945736	rs3825973	17	TPM1	2673	intergenic	7.491	5	5	14	1	1	1
rs10851721	15	63332383	C	T	0.4464	3.256e-05	0.1454	0.03473	0.945736	rs3825973	17	TPM1	2447	intergenic	5.88	5	5	14	1	1	1
rs4774471	15	63332645	T	A	0.4464	3.191e-05	0.1454	0.0347	0.945736	rs3825973	17	TPM1	2185	intergenic	3.895	1f	5	14	1	1	1
rs5813187	15	63333134	GA	G	0.4464	3.191e-05	0.1454	0.0347	0.945736	rs3825973	17	TPM1	1696	intergenic	3.606	NA	2	13	1	1	1
rs3809565	15	63333619	G	A	0.4464	3.129e-05	0.1456	0.03471	0.945736	rs3825973	17	TPM1	1211	intergenic	18.26	2b	1	13	1	1	1
rs3809566	15	63333724	G	A	0.4405	1.551e-05	0.1509	0.03465	0.976422	rs3825973	17	TPM1	1106	intergenic	6.244	4	1	13	1	1	1
rs3809567	15	63334520	C	A	0.4345	5.313e-06	0.1603	0.03491	1	rs3825973	17	TPM1	310	upstream	9.877	2b	1	1	1	1	1
rs3809568	15	63334609	C	G	0.4415	8.079e-06	0.1573	0.03495	0.972664	rs3825973	17	TPM1	221	upstream	8.444	4	1	1	1	1	1
rs3825973	15	63334635	C	G	0.4345	5.313e-06	0.1603	0.03491	1	rs3825973	17	TPM1	195	upstream	4.871	4	1	1	1	1	1
rs8042834	15	63334698	C	G	0.4355	7.231e-06	0.1578	0.03488	0.988144	rs3825973	17	TPM1	132	upstream	11.28	4	1	1	1	1	1
rs150546552	15	63335326	T	TTTG	0.4395	8.198e-06	0.1579	0.0351	0.964599	rs3825973	17	TPM1	0	intronic	15.45	NA	1	1	1	1	1
rs5813188	15	63337545	CT	C	0.4415	1.401e-05	0.1538	0.03513	0.956753	rs3825973	17	TPM1	0	intronic	11.76	NA	1	1	1	1	1
rs8042331	15	63338457	T	C	0.4415	1.295e-05	0.1548	0.0352	0.956753	rs3825973	17	TPM1:RP11-244F12.3	0:0	ncRNA_exonic	5.308	4	1	13	1	1	1
rs8026502	15	63338757	T	C	0.4415	1.295e-05	0.1548	0.0352	0.956753	rs3825973	17	TPM1:RP11-244F12.3	0:0	ncRNA_exonic	10.77	2b	1	5	1	1	1
rs79854225	15	63339271	G	A	0.4355	5.183e-06	0.1618	0.03518	0.980188	rs3825973	17	TPM1:RP11-244F12.3	0:0	ncRNA_exonic	0.627	2b	1	3	1	1	1
rs57645645	15	63339578	G	A	0.4415	1.424e-05	0.1539	0.03517	0.956753	rs3825973	17	TPM1:RP11-244F12.3	0:0	ncRNA_exonic	11.24	4	1	3	1	1	1
rs73431508	15	63340416	A	G	0.4415	1.62e-05	0.1527	0.03514	0.956753	rs3825973	17	TPM1:RP11-244F12.3	0:0	ncRNA_exonic	9.583	1f	1	1	1	1	1
rs4075047	15	63340607	T	C	0.4415	1.62e-05	0.1527	0.03514	0.956753	rs3825973	17	TPM1:RP11-244F12.3	0:0	ncRNA_exonic	13.82	NA	1	1	1	1	1
rs111470259	15	63340705	C	T	0.4345	8.756e-06	0.1592	0.0355	0.984102	rs3825973	17	TPM1:RP11-244F12.3	0:0	ncRNA_exonic	14.64	2b	1	1	1	1	1
rs148517607	15	63340989	C	CG	0.4415	3.876e-05	0.1469	0.03544	0.956753	rs3825973	17	TPM1:RP11-244F12.3	0:0	ncRNA_exonic	6.155	NA	1	1	1	1	1
rs117389407	15	63340990	C	T	0.4415	3.876e-05	0.1469	0.03544	0.956753	rs3825973	17	TPM1:RP11-244F12.3	0:0	ncRNA_exonic	7.248	2b	1	1	1	1	1
rs12441488	15	63341502	A	C	0.4415	4.252e-05	0.1475	0.03576	0.948903	rs3825973	17	TPM1:RP11-244F12.3	0:0	ncRNA_exonic	9.565	3a	1	2	1	1	1
rs12443634	16	81524274	C	A	0.1369	4.539e-05	-0.148	0.03601	0.788746	rs2966093	18	CMIP	0	intronic	2.678	5	4	5	1	0	1
rs56823429	16	81533789	A	C	0.1458	4.481e-05	-0.1438	0.03498	0.869263	rs2966093	18	CMIP	0	intronic	0.144	3a	2	7	1	0	1
rs2966092	16	81537760	G	C	0.1438	2.12e-05	-0.1512	0.03527	0.900356	rs2966093	18	CMIP	0	intronic	0.152	NA	4	5	1	0	1
rs2966093	16	81538620	A	G	0.1567	8.298e-06	-0.1578	0.03509	1	rs2966093	18	CMIP	0	intronic	6.543	1f	2	5	1	0	1
rs2966094	16	81538637	C	A	0.1508	1.098e-05	-0.1554	0.03506	0.953331	rs2966093	18	CMIP	0	intronic	5.724	4	2	5	1	0	1
rs2927307	16	81543832	A	G	0.1577	6.298e-05	-0.1414	0.03509	0.869335	rs2966093	18	CMIP	0	intronic	1.559	NA	4	5	1	0	1
rs2966095	16	81549458	G	A	0.1548	0.0001336	-0.1365	0.03552	0.861445	rs2966093	18	CMIP	0	intronic	2.58	5	4	5	1	0	1
rs2966097	16	81549708	T	C	0.1548	0.0002001	-0.1328	0.03548	0.861445	rs2966093	18	CMIP	0	intronic	1.143	6	4	5	1	0	1
rs75067618	17	16247734	G	A	0.02083	NA	NA	NA	0.853827	17:16285404	19	PIGL:CENPV	0:0	intronic	4.142	5	4	4	1	1	0
rs112533199	17	16248087	T	A	0.02679	NA	NA	NA	0.65493	17:16285404	19	PIGL:CENPV	0:0	intronic	2.888	6	4	5	1	0	0
rs150520645	17	16264081	T	C	0.01885	NA	NA	NA	0.948041	17:16285404	19	CENPV	7110	intergenic	8.292	6	5	15	1	0	0
rs28610260	17	16274687	T	C	0.01984	NA	NA	NA	1	17:16285404	19	UBB	9424	intergenic	2.402	6	5	15	1	1	1
rs8065945	17	16278998	C	T	0.01885	NA	NA	NA	0.948041	17:16285404	19	UBB	5113	intergenic	1.357	7	5	15	1	1	1
rs144699710	17	16280131	G	A	0.0248	NA	NA	NA	0.791736	17:16285404	19	UBB	3980	intergenic	0.073	7	5	15	1	1	1
rs76403078	17	16280370	C	T	0.0248	NA	NA	NA	0.791736	17:16285404	19	UBB	3741	intergenic	3.909	5	5	15	1	1	1
rs11331934	17	16282303	CT	C	0.03175	NA	NA	NA	0.609504	17:16285404	19	UBB	1808	intergenic	0.108	NA	2	15	1	0	1
rs9893057	17	16283125	G	A	0.01984	NA	NA	NA	1	17:16285404	19	UBB	986	upstream	1.078	5	2	15	1	1	1
rs9893097	17	16283172	G	A	0.01984	NA	NA	NA	1	17:16285404	19	UBB	939	upstream	0.913	4	2	15	1	1	1
rs9908067	17	16285063	C	G	0.01984	NA	NA	NA	1	17:16285404	19	UBB	0	intronic	1.23	4	1	1	1	1	1
17:16285404	17	16285404	C	T	0.01984	1.581e-06	0.1887	0.03894	1	17:16285404	19	UBB	0	exonic	21	5	1	3	1	1	1
rs56884277	17	16286623	G	A	0.01984	NA	NA	NA	1	17:16285404	19	UBB	563	upstream:downstream	9.477	4	1	3	1	1	1
rs116472694	17	16288409	A	G	0.01984	NA	NA	NA	1	17:16285404	19	UBB	2349	intergenic	0.139	5	5	5	1	1	1
rs28833845	17	16289375	C	T	0.01984	NA	NA	NA	1	17:16285404	19	UBB	3315	intergenic	0.002	5	1	5	1	1	1
rs72429062	17	16293796	TGAC	T	0.01984	NA	NA	NA	1	17:16285404	19	FTLP12	951	upstream	2.622	NA	5	15	1	1	1
rs77224248	17	16294786	G	A	0.01984	NA	NA	NA	1	17:16285404	19	FTLP12	0	ncRNA_exonic	0.724	7	4	15	1	1	1
rs181902222	17	16296615	T	A	0.02976	NA	NA	NA	0.652893	17:16285404	19	FTLP12	1418	intergenic	0.016	6	5	15	1	1	1
rs145197040	17	16297919	TG	T	0.02579	NA	NA	NA	0.778746	17:16285404	19	FTLP12	2722	intergenic	1.163	NA	5	15	1	1	1
rs60865756	17	16298174	G	A	0.02381	NA	NA	NA	0.826446	17:16285404	19	FTLP12	2977	intergenic	3.965	7	5	15	1	1	1
rs144745091	17	16316707	T	C	0.0248	NA	NA	NA	0.791736	17:16285404	19	RP11-138I1.2	1130	intergenic	2.395	7	5	15	1	1	1
rs116435040	17	16319880	G	T	0.02282	NA	NA	NA	0.775998	17:16285404	19	RP11-138I1.2:TRPV2	0:0	ncRNA_exonic	2.936	4	1	1	1	1	1
kgp9805060	18	22673934	A	G	0.1359	0.0002104	-0.1297	0.03479	0.661153	rs12958285	20	ZNF521	0	intronic	2.369	6	5	15	1	0	1
rs35889630	18	22676398	T	G	0.1339	5.052e-05	-0.1428	0.03497	0.672996	rs12958285	20	ZNF521	0	intronic	5.767	5	5	15	1	0	1
rs34276564	18	22679588	G	C	0.131	5.7e-05	-0.1419	0.03501	0.670125	rs12958285	20	ZNF521	0	intronic	2.242	6	5	15	1	0	1
rs71375166	18	22682471	C	CTA	0.124	0.0001559	-0.1333	0.03503	0.69771	rs12958285	20	ZNF521	0	intronic	0.792	NA	5	15	1	0	1
rs4129315	18	22683434	A	G	0.1359	0.0001099	-0.1353	0.03476	0.672013	rs12958285	20	ZNF521	0	intronic	15	NA	5	15	1	0	1
rs56233715	18	22683632	C	A	0.13	0.0002087	-0.1302	0.03489	0.694409	rs12958285	20	ZNF521	0	intronic	2.221	3a	5	15	1	0	1
rs12953891	18	22689509	C	T	0.131	3.275e-05	-0.1495	0.03571	0.688083	rs12958285	20	ZNF521	0	intronic	10.49	7	4	15	1	0	1
rs12958285	18	22690876	G	A	0.12	4.915e-06	-0.1626	0.03526	1	rs12958285	20	ZNF521	0	intronic	0.247	7	5	15	1	0	1
rs8092754	18	22692083	T	G	0.12	7.78e-06	-0.1592	0.03529	1	rs12958285	20	ZNF521	0	intronic	0.503	7	4	15	1	0	1
rs66702172	18	22692618	G	T	0.12	9.531e-06	-0.158	0.03538	1	rs12958285	20	ZNF521	0	intronic	3.724	6	4	15	1	0	1
rs35988486	18	22693092	G	T	0.12	9.307e-06	-0.1576	0.03525	1	rs12958285	20	ZNF521	0	intronic	20.5	7	4	15	1	0	1
rs72017668	18	22693587	CAGAAAA	C	0.119	9.307e-06	-0.1576	0.03525	0.990585	rs12958285	20	ZNF521	0	intronic	14.69	NA	5	15	1	0	1
rs35266103	18	22694304	A	G	0.1181	9.307e-06	-0.1576	0.03525	0.981218	rs12958285	20	ZNF521	0	intronic	4.626	7	5	15	1	0	1
rs35050905	18	22696887	G	GTA	0.1151	3.029e-05	-0.1474	0.03508	0.953278	rs12958285	20	ZNF521	0	intronic	0.327	NA	5	15	1	0	1
GSA-rs34963938	18	22698930	A	G	0.1151	0.001166	-0.114	0.03493	0.934523	rs12958285	20	ZNF521	0	intronic	4.039	7	5	15	1	0	1
rs34382132	18	22699308	T	A	0.119	0.001204	-0.1136	0.03492	0.880804	rs12958285	20	ZNF521	0	intronic	14.91	5	5	15	1	0	1
18:22700675	18	22700675	A	G	0.119	0.0007932	-0.1177	0.03491	0.880804	rs12958285	20	ZNF521	0	intronic	4.34	6	4	15	1	0	1
rs35195345	18	22702153	C	T	0.1181	0.001192	-0.1142	0.03508	0.871707	rs12958285	20	ZNF521	0	intronic	15.96	7	5	15	1	0	1
rs201729321	18	22703102	CT	C	0.1181	0.001244	-0.1136	0.03503	0.871707	rs12958285	20	ZNF521	0	intronic	0.814	NA	4	15	1	0	1
rs35473451	18	22705391	G	T	0.119	0.001171	-0.1139	0.03494	0.880804	rs12958285	20	ZNF521	0	intronic	5.027	7	5	15	1	0	1
rs72887750	18	22705604	T	C	0.121	0.0005354	-0.1218	0.03501	0.863778	rs12958285	20	ZNF521	0	intronic	6.894	5	5	15	1	0	1
rs4315417	18	22706783	A	G	0.121	0.0002182	-0.1303	0.03503	0.900171	rs12958285	20	ZNF521	0	intronic	11.49	2b	5	15	1	0	1
rs72887758	18	22709098	G	A	0.123	0.0002359	-0.1297	0.03507	0.883354	rs12958285	20	ZNF521	0	intronic	2.62	7	5	15	1	0	1
rs7230316	18	22710340	T	A	0.121	0.0005106	-0.1223	0.03501	0.900171	rs12958285	20	ZNF521	0	intronic	0.138	6	4	15	1	0	1
18:22711523	18	22711523	T	C	0.121	0.0008408	-0.1173	0.03497	0.863778	rs12958285	20	ZNF521	0	intronic	2.751	6	4	15	1	0	1
18:22712555	18	22712555	G	A	0.121	0.0004936	-0.1224	0.03494	0.863778	rs12958285	20	ZNF521	0	intronic	18.97	7	4	15	1	0	1
rs34030163	18	22713239	T	A	0.121	0.0006841	-0.1195	0.035	0.863778	rs12958285	20	ZNF521	0	intronic	13.75	5	4	15	1	0	1
rs7228750	18	22714149	G	A	0.119	0.001162	-0.114	0.03494	0.880804	rs12958285	20	ZNF521	0	intronic	0.64	5	4	15	1	0	1
rs35528725	18	22718230	A	T	0.12	0.001102	-0.1154	0.0352	0.854687	rs12958285	20	ZNF521	0	intronic	1.395	7	4	15	1	0	1
rs35098295	18	22720031	C	G	0.121	0.001519	-0.112	0.03517	0.829131	rs12958285	20	ZNF521	0	intronic	0.474	7	5	15	1	0	1
rs67298107	18	22726086	G	T	0.12	0.003469	-0.1032	0.03517	0.854687	rs12958285	20	ZNF521	0	intronic	11.62	7	5	15	1	0	1
rs12959390	18	22726975	C	T	0.1181	0.00165	-0.111	0.0351	0.854084	rs12958285	20	ZNF521	0	intronic	0.017	NA	4	15	1	0	1
rs12962215	18	22730645	T	C	0.122	0.003468	-0.1028	0.03505	0.838166	rs12958285	20	ZNF521	0	intronic	7.788	7	4	15	1	0	1
rs8083432	18	22731360	A	C	0.12	0.003309	-0.1031	0.03498	0.854687	rs12958285	20	ZNF521	0	intronic	0.695	6	4	15	1	0	1
rs12959363	18	22741340	C	T	0.1171	0.001798	-0.1113	0.03549	0.841838	rs12958285	20	ZNF521	0	intronic	15.83	6	4	15	1	0	1
rs12961010	18	22745505	G	T	0.1161	0.002689	-0.1064	0.03532	0.852543	rs12958285	20	ZNF521	0	intronic	21.6	4	1	15	1	0	1
rs35051233	18	22746124	A	G	0.119	NA	NA	NA	0.861994	rs12958285	20	ZNF521	0	intronic	5.352	7	4	15	1	1	1

[truncated: 9 more sheets: Table S11, Table S12, Table S13, Table S14, Table S15, Table S16, Table S17, Table S18, Table S19]
